# Supplementary material
Source: PubMed Central journal article supplement (PMC7654567)

# Pd(II)-Catalyzed Enantioselective $\gamma$ -C(sp<sup>3</sup>)-H Functionalizations of Free Cyclopropylmethamines

Zhe Zhuang,<sup>1</sup> and Jin-Quan Yu<sup>1\*</sup>

<sup>1</sup>Department of Chemistry, The Scripps Research Institute, 10550 N. Torrey Pines Road, La Jolla, CA 92037, United States

## Table of Contents

|                                                                                           |      |
|-------------------------------------------------------------------------------------------|------|
| General Information                                                                       | S2   |
| Experimental Section                                                                      |      |
| Preparation of aliphatic primary and secondary amines                                     | S3   |
| General procedure of the preparation of thioether ligands                                 | S4   |
| Table S1. Ligand investigation for $\gamma$ -C(sp <sup>3</sup> )-H arylation              | S5   |
| Table S2. Pd source investigation for $\gamma$ -C(sp <sup>3</sup> )-H arylation           | S6   |
| Table S3. Ag salt investigation for $\gamma$ -C(sp <sup>3</sup> )-H arylation             | S7   |
| Table S4. Concentration investigation for $\gamma$ -C(sp <sup>3</sup> )-H arylation       | S8   |
| Table S5. Thioether ligand investigation for $\gamma$ -C(sp <sup>3</sup> )-H arylation    | S9   |
| Table S6. Aryl iodide loading investigation for $\gamma$ -C(sp <sup>3</sup> )-H arylation | S10  |
| Table S7. Optimization of conditions for $\gamma$ -C(sp <sup>3</sup> )-H carbonylation    | S11  |
| Table S8. Optimization of conditions for $\gamma$ -C(sp <sup>3</sup> )-H olefination      | S12  |
| Table S9. Selected other substrates for $\gamma$ -C(sp <sup>3</sup> )-H arylation         | S13  |
| General procedure for $\gamma$ -C(sp <sup>3</sup> )-H arylation                           | S14  |
| Substrate scope for $\gamma$ -C(sp <sup>3</sup> )-H arylation                             | S15  |
| Aryl and heteroaryl iodide scope for $\gamma$ -C(sp <sup>3</sup> )-H arylation            | S55  |
| General procedure for $\gamma$ -C(sp <sup>3</sup> )-H carbonylation                       | S91  |
| Substrate scope for $\gamma$ -C(sp <sup>3</sup> )-H carbonylation                         | S92  |
| General procedure for $\gamma$ -C(sp <sup>3</sup> )-H olefination                         | S102 |
| Substrate scope for $\gamma$ -C(sp <sup>3</sup> )-H olefination                           | S103 |
| References                                                                                | S113 |
| <sup>1</sup> H and <sup>13</sup> C NMR Spectra                                            | S114 |

**General Information:** HFIP was obtained from Oakwood. Pd(OAc)<sub>2</sub>, Pd(TFA)<sub>2</sub>, and Ag<sub>2</sub>O were obtained from Strem. Ag<sub>2</sub>CO<sub>3</sub>, NaOAc, and Mo(CO)<sub>6</sub> were purchased from Sigma-Aldrich. Pentafluorostyrene was purchased from Combi-Blocks. Free aliphatic primary and secondary amines were obtained from the commercial sources or synthesized following literature procedures. Other reagents were purchased at the highest commercial quality and used without further purification, unless otherwise stated. Analytical thin layer chromatography was performed on 0.25 mm silica gel 60-F254. Visualization was carried out with short-wave UV light or KMnO<sub>4</sub> and heat as developing agents. <sup>1</sup>H NMR spectra were recorded on Bruker DRX-600 instrument. Chemical shifts were quoted in parts per million (ppm) referenced to 0.00 ppm for TMS. The following abbreviations (or combinations thereof) were used to explain multiplicities: s = singlet, d = doublet, t = triplet, q = quartet, m = multiplet, br = broad. Coupling constants, *J*, were reported in Hertz unit (Hz). <sup>13</sup>C NMR spectra were recorded on Bruker DRX-600 and were fully decoupled by broad band proton decoupling. Chemical shifts were reported in ppm referenced to the center line of a triplet at 77.16 ppm of CDCl<sub>3</sub>. Column chromatography was performed using E. Merck silica (60, particle size 0.043–0.063 mm), and pTLC was performed on Merck silica plates (60F-254). High-resolution mass spectra (HRMS) were recorded on an Agilent Mass spectrometer using ESI-TOF (electrospray ionization-time of flight). Enantiomeric ratios (er) were determined on the Agilent Technologies supercritical fluid chromatography (SFC) system using commercially available chiral columns.

## Preparation of aliphatic primary and secondary amines

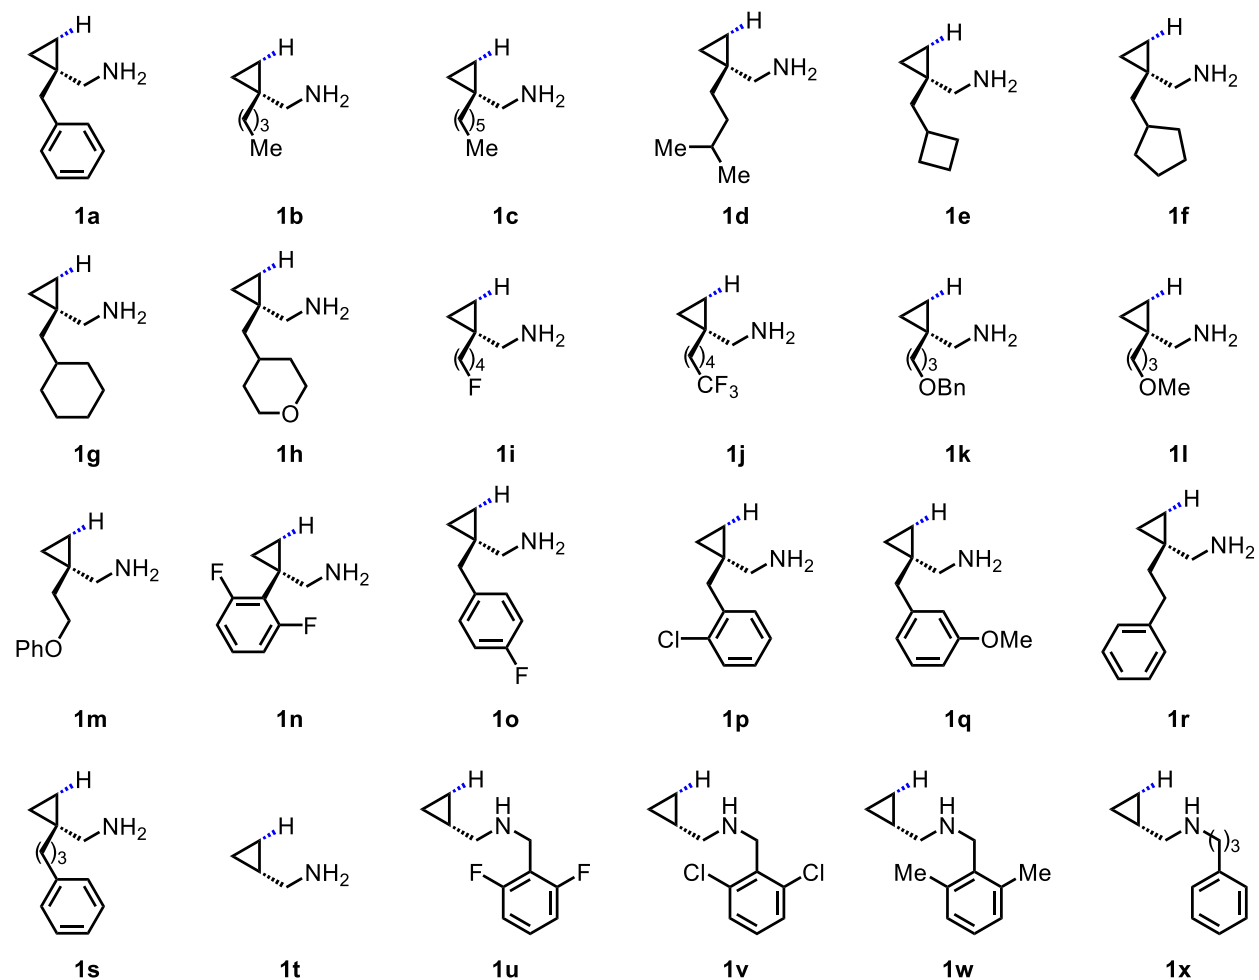

Aliphatic primary and secondary amines were obtained from the commercial sources or synthesized following literature procedures<sup>1-3</sup>.

## General procedure of the preparation of thioether ligands

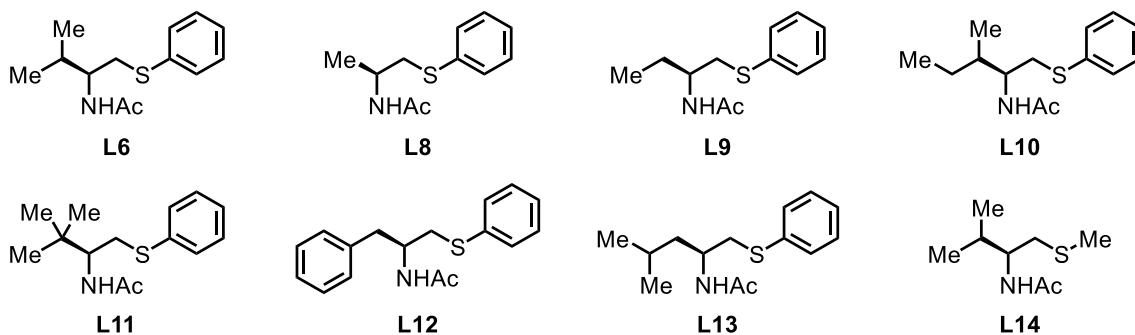

Thioether ligands (**L6** and **L8** to **L14**) were synthesized following literature procedure<sup>4</sup> with slight modification:

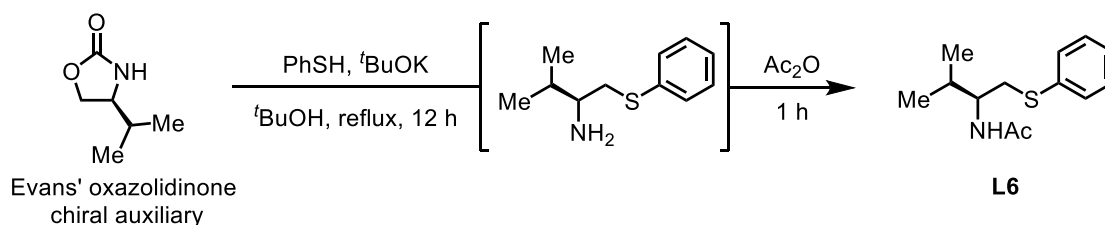

To the *t*-BuOH (10.0 mL) solution of thiophenol (15.0 mmol, 1.54 mL) was added *t*-BuOK (11.0 mmol, 1.23 g) and the mixture was stirred at rt for 10 min. Then Evans oxazolidone chiral auxiliary (10.0 mmol, 1.29 g) was added to the solution and the mixture was stirred under reflux for 12 h. After being allowed to cool to room temperature, Ac<sub>2</sub>O (15.0 mmol, 1.42 mL) was added to the solution and the mixture was stirred at rt for 1 h. The mixture was then concentrated *in vacuo*, diluted with EA, and washed with saturated NH<sub>4</sub>Cl and NaHCO<sub>3</sub>. The organic layer was dried over MgSO<sub>4</sub>, concentrated *in vacuo* and then purified by recrystallization in EA to yield thioether ligand **L6** (2.18 g, 92% yield). The NMR data matches the reported data<sup>5</sup>.

**Table S1. Ligand investigation for  $\gamma$ -C(sp<sup>3</sup>)-H arylation<sup>a,b</sup>**

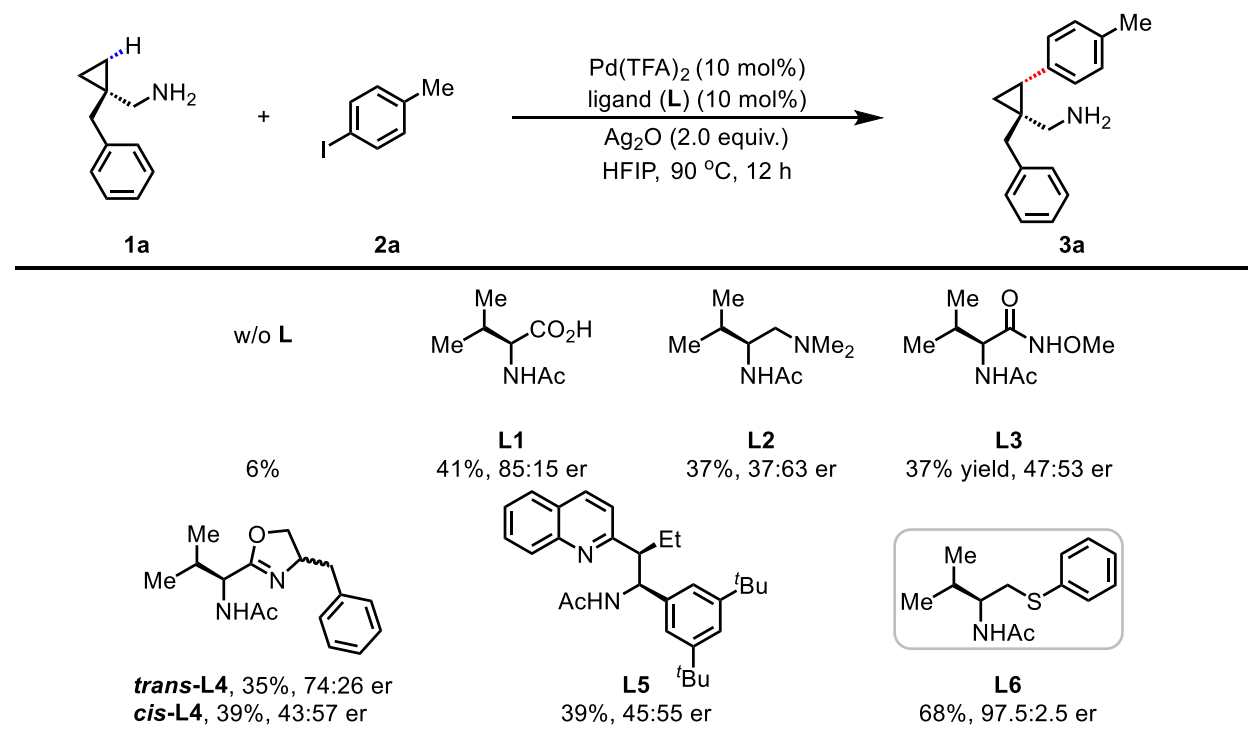

<sup>a</sup>Conditions: **1a** (0.1 mmol), Pd(TFA)<sub>2</sub> (10 mol%), ligand (**L**) (10 mol%), 4-iodotoluene **2a** (2.0 equiv.), Ag<sub>2</sub>O (2.0 equiv.), HFIP (0.2 mL), 90 °C, 12 h. <sup>b</sup>The yields were determined by <sup>1</sup>H NMR analysis of the crude product using CH<sub>2</sub>Br<sub>2</sub> as the internal standard. The er values were determined on the SFC system using commercially available chiral columns.

**Table S2. Pd source investigation for  $\gamma$ -C(sp<sup>3</sup>)-H arylation<sup>a,b</sup>**

Reaction scheme: 1a + 2a  $\xrightarrow[\text{HFIP, 90 }^\circ\text{C, 12 h}]{\text{Pd source (10 mol\%), L6 (10 mol\%), Ag}_2\text{CO}_3 \text{ (2.0 equiv.)}}$  3a

| entry | Pd source                                           | yield (%) | er       | entry | Pd source                                                           | yield (%) | er        |
|-------|-----------------------------------------------------|-----------|----------|-------|---------------------------------------------------------------------|-----------|-----------|
| 1     | w/o                                                 | 0         | n.d.     | 7     | [Pd(allyl)Cl] <sub>2</sub>                                          | 47        | 88:12     |
| 2     | Pd(OAc) <sub>2</sub>                                | 54        | 89:11    | 8     | PdCl <sub>2</sub>                                                   | 0         | n.d.      |
| 3     | Pd(OPiv) <sub>2</sub>                               | 50        | 77:23    | 9     | PdI <sub>2</sub>                                                    | 46        | 88.5:11.5 |
| 4     | Pd(TFA) <sub>2</sub>                                | 56        | 93:7     | 10    | Pd(CH <sub>3</sub> CN) <sub>4</sub> (BF <sub>4</sub> ) <sub>2</sub> | 48        | 89:11     |
| 5     | Pd(CH <sub>3</sub> CN) <sub>2</sub> Cl <sub>2</sub> | 44        | 90.5:9.5 | 11    | Pd <sub>2</sub> (dba) <sub>3</sub>                                  | 39        | 87.5:12.5 |
| 6     | Pd(PhCN) <sub>2</sub> Cl <sub>2</sub>               | 44        | 90:10    |       |                                                                     |           |           |

<sup>a</sup>Conditions: **1a** (0.1 mmol), Pd source (10 mol%), **L6** (10 mol%), 4-iodotoluene **2a** (2.0 equiv.), Ag<sub>2</sub>CO<sub>3</sub> (2.0 equiv.), HFIP (0.3 mL), 90 °C, 12 h. <sup>b</sup>The yields were determined by <sup>1</sup>H NMR analysis of the crude product using CH<sub>2</sub>Br<sub>2</sub> as the internal standard. The er values were determined on the SFC system using commercially available chiral columns.

**Table S3. Ag salt investigation for  $\gamma$ -C(sp<sup>3</sup>)-H arylation<sup>a,b</sup>**

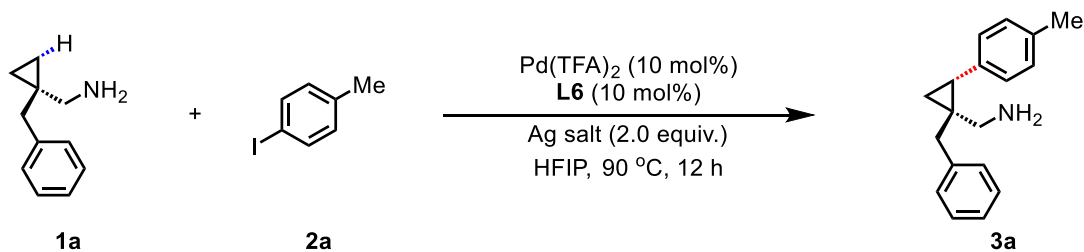

| entry | Ag salt                         | yield (%) | er        | entry | Ag salt                         | yield (%) | er    |
|-------|---------------------------------|-----------|-----------|-------|---------------------------------|-----------|-------|
| 1     | w/o                             | 0         | n.d.      | 5     | Ag <sub>2</sub> O               | 58        | 95:5  |
| 2     | Ag <sub>2</sub> CO <sub>3</sub> | 56        | 93:7      | 6     | AgO                             | 53        | 90:10 |
| 3     | AgOAc                           | 47        | 47.5:52.5 | 7     | Ag <sub>3</sub> PO <sub>4</sub> | 0         | n.d.  |
| 4     | AgTFA                           | 0         | n.d.      |       |                                 |           |       |

<sup>a</sup>Conditions: **1a** (0.1 mmol), Pd(TFA)<sub>2</sub> (10 mol%), **L6** (10 mol%), 4-iodotoluene **2a** (2.0 equiv.), Ag salt (2.0 equiv.), HFIP (0.3 mL), 90 °C, 12 h. <sup>b</sup>The yields were determined by <sup>1</sup>H NMR analysis of the crude product using CH<sub>2</sub>Br<sub>2</sub> as the internal standard. The er values were determined on the SFC system using commercially available chiral columns.

**Table S4. Concentration investigation for  $\gamma$ -C(sp<sup>3</sup>)-H arylation<sup>a,b</sup>**

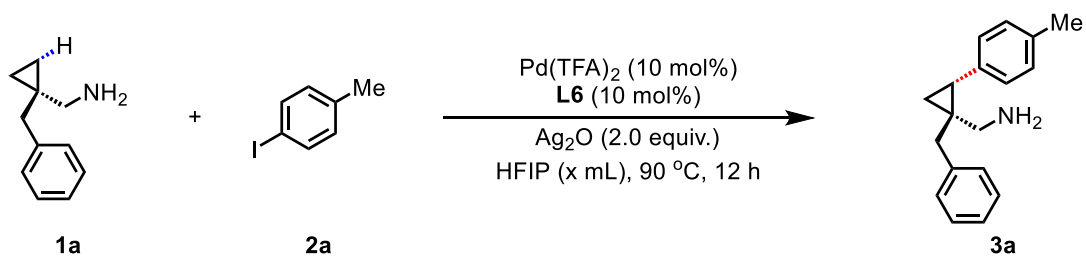

| entry | x mL | yield (%) | er       |
|-------|------|-----------|----------|
| 1     | 1.0  | 46        | 80:20    |
| 2     | 0.5  | 55        | 85:15    |
| 3     | 0.3  | 58        | 95:5     |
| 4     | 0.2  | 68        | 97.5:2.5 |

<sup>a</sup>Conditions: **1a** (0.1 mmol), Pd(TFA)<sub>2</sub> (10 mol%), **L6** (10 mol%), 4-iodotoluene **2a** (2.0 equiv.), Ag<sub>2</sub>O (2.0 equiv.), HFIP (x mL), 90 °C, 12 h. <sup>b</sup>The yields were determined by <sup>1</sup>H NMR analysis of the crude product using CH<sub>2</sub>Br<sub>2</sub> as the internal standard. The er values were determined on the SFC system using commercially available chiral columns.



**Table S5. Thioether ligand investigation for  $\gamma$ -C(sp<sup>3</sup>)-H arylation<sup>a,b</sup>**

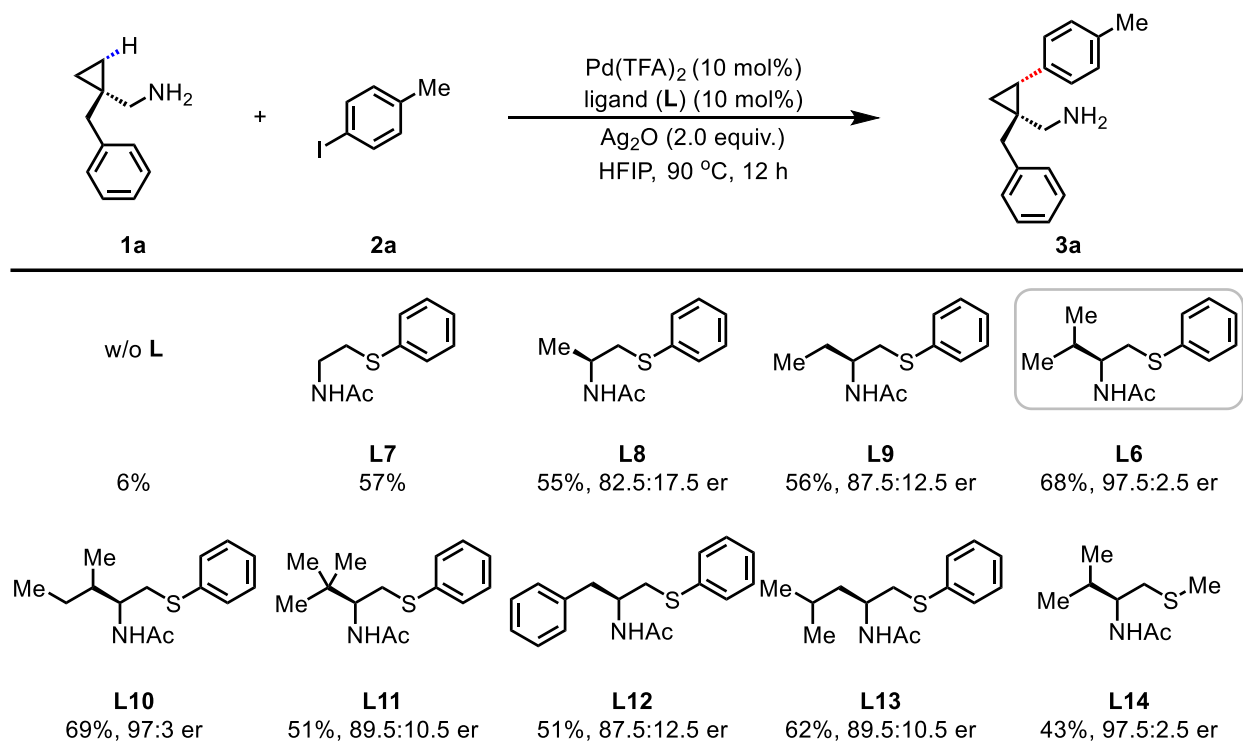

<sup>a</sup>Conditions: **1a** (0.1 mmol), Pd(TFA)<sub>2</sub> (10 mol%), ligand (**L**) (10 mol%), 4-iodotoluene **2a** (2.0 equiv.), Ag<sub>2</sub>O (2.0 equiv.), HFIP (0.2 mL), 90 °C, 12 h. <sup>b</sup>The yields were determined by <sup>1</sup>H NMR analysis of the crude product using CH<sub>2</sub>Br<sub>2</sub> as the internal standard. The er values were determined on the SFC system using commercially available chiral columns.

**Table S6. Aryl iodide loading investigation for  $\gamma$ -C(sp<sup>3</sup>)-H arylation<sup>a,b</sup>**

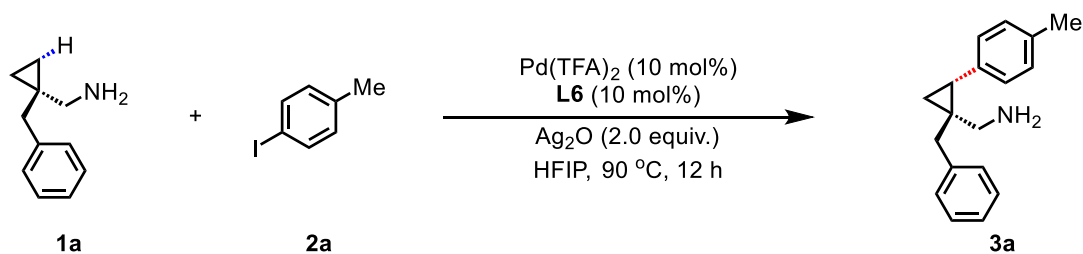

| entry | <b>2a</b> (x equiv.) | yield (%)            | er       |
|-------|----------------------|----------------------|----------|
| 1     | 2.0                  | 68                   | 97.5:2.5 |
| 2     | 3.0                  | 73(68 <sup>c</sup> ) | 97.5:2.5 |
| 3     | 4.0                  | 75                   | 97:3     |

<sup>a</sup>Conditions: **1a** (0.1 mmol), Pd(TFA)<sub>2</sub> (10 mol%), **L6** (10 mol%), 4-iodotoluene **2a** (x equiv.), Ag<sub>2</sub>O (2.0 equiv.), HFIP (0.2 mL), 90 °C, 12 h. <sup>b</sup>The yields were determined by <sup>1</sup>H NMR analysis of the crude product using CH<sub>2</sub>Br<sub>2</sub> as the internal standard. The er values were determined on the SFC system using commercially available chiral columns.

<sup>c</sup>Isolated yield of the corresponding Boc-protected amine.

**Table S7. Optimization of conditions for  $\gamma$ -C(sp<sup>3</sup>)-H carbonylation<sup>a,b</sup>**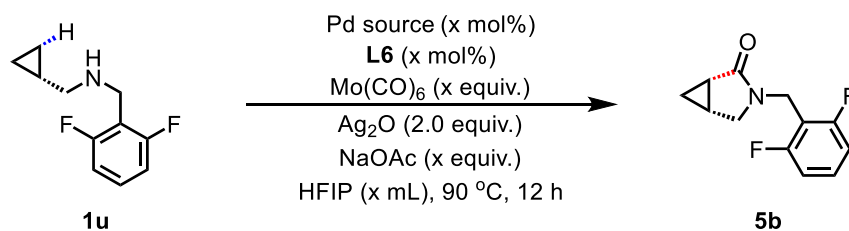

| entry | Pd source/ <b>L6</b> (x mol%)              | Mo(CO) <sub>6</sub> (x equiv.) | NaOAc (x equiv.) | HFIP (x mL) | yield (%)            | er       |
|-------|--------------------------------------------|--------------------------------|------------------|-------------|----------------------|----------|
| 1     | Pd(TFA) <sub>2</sub> / <b>L6</b> (10 mol%) | 0.5                            | w/o              | 0.2         | 13                   | 93.5:6.5 |
| 2     | Pd(OAc) <sub>2</sub> / <b>L6</b> (10 mol%) | 0.5                            | w/o              | 0.2         | 15                   | 93.5:6.5 |
| 3     | Pd(OAc) <sub>2</sub> / <b>L6</b> (10 mol%) | 0.5                            | 1.0              | 0.2         | 38                   | 91.5:8.5 |
| 4     | Pd(OAc) <sub>2</sub> / <b>L6</b> (10 mol%) | 0.3                            | 1.0              | 0.2         | 40                   | 93:7     |
| 5     | Pd(OAc) <sub>2</sub> / <b>L6</b> (10 mol%) | 0.3                            | 1.0              | 0.1         | 38                   | 94.5:5.5 |
| 6     | Pd(OAc) <sub>2</sub> / <b>L6</b> (15 mol%) | 0.3                            | 1.0              | 0.1         | 43(45 <sup>c</sup> ) | 95:5     |

<sup>a</sup>Conditions: **1u** (0.1 mmol), Pd source (x mol%), **L6** (x mol%), Mo(CO)<sub>6</sub> (x equiv.), Ag<sub>2</sub>O (2.0 equiv.), NaOAc (x equiv.), HFIP (x mL), 90 °C, 12 h. <sup>b</sup>The yields were determined by <sup>1</sup>H NMR analysis of the crude product using CH<sub>2</sub>Br<sub>2</sub> as the internal standard. The er values were determined on the SFC system using commercially available chiral columns. <sup>c</sup>Isolated yield.

**Table S8. Optimization of conditions for  $\gamma$ -C(sp<sup>3</sup>)-H olefination<sup>a,b</sup>**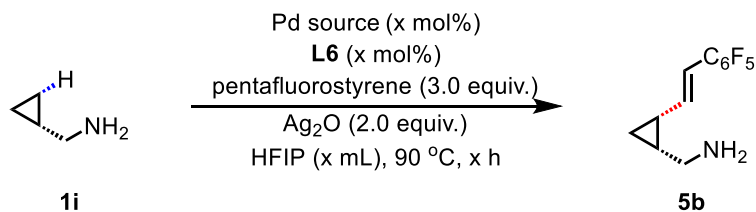

| entry | Pd source/L6 (x mol%)              | HFIP (x mL) | time (x h) | yield (%)            | er       |
|-------|------------------------------------|-------------|------------|----------------------|----------|
| 1     | Pd(TFA) <sub>2</sub> /L6 (10 mol%) | 0.2         | 12         | 14                   | 91:9     |
| 2     | Pd(OAc) <sub>2</sub> /L6 (10 mol%) | 0.2         | 12         | 22                   | 90:10    |
| 3     | Pd(OAc) <sub>2</sub> /L6 (10 mol%) | 0.1         | 12         | 28                   | 95.5:4.5 |
| 4     | Pd(OAc) <sub>2</sub> /L6 (15 mol%) | 0.1         | 12         | 36                   | 95:5     |
| 5     | Pd(OAc) <sub>2</sub> /L6 (15 mol%) | 0.1         | 6          | 41(39 <sup>c</sup> ) | 95.5:4.5 |

<sup>a</sup>Conditions: **1i** (0.1 mmol), Pd source (x mol%), **L6** (x mol%), Ag<sub>2</sub>O (2.0 equiv.), HFIP (x mL), 90 °C, x h. <sup>b</sup>The yields were determined by <sup>1</sup>H NMR analysis of the crude product using CH<sub>2</sub>Br<sub>2</sub> as the internal standard. The er values were determined on the SFC system using commercially available chiral columns. <sup>c</sup>Isolated yield of the corresponding Boc-protected amine.

**Table S9. Selected other substrates for  $\gamma$ -C(sp<sup>3</sup>)-H arylation**

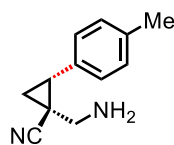

<5%, er n.d.

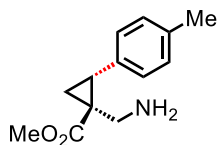

<5%, er n.d.

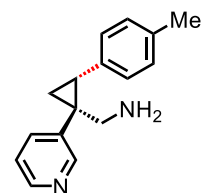

<5%, er n.d.

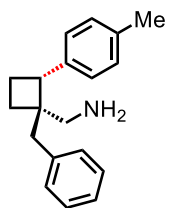

<5%, er n.d.

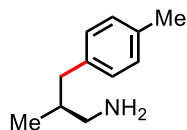

70% yield (3:1 mono:di),  
75:25 er

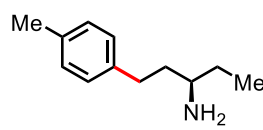

60% yield (6:1 mono:di),  
80:20 er

### General procedure for $\gamma$ -C(sp<sup>3</sup>)-H arylation

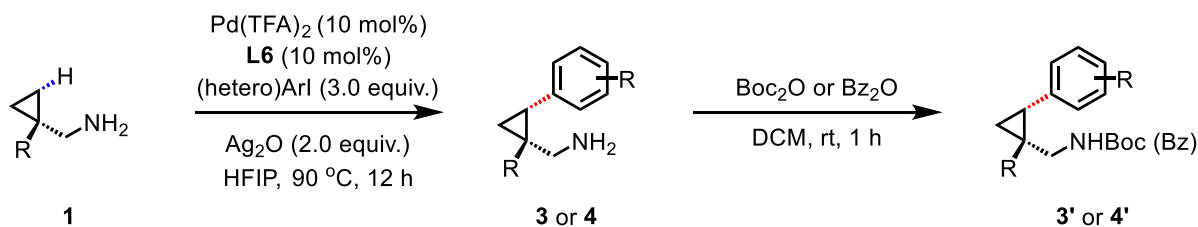

**General Procedure A:** In the culture tube, Pd(TFA)<sub>2</sub> (10 mol%, 3.3 mg), ligand **L6** (10 mol%, 2.4 mg), (hetero)aryl iodide (3.0 equiv.), Ag<sub>2</sub>O (2.0 equiv., 46.3 mg), and free aliphatic amine **1** (0.1 mmol) in order were weighed in air and placed with a magnetic stir bar. Then HFIP (0.2 mL) were added. The reaction mixture was stirred at rt for 3 min, and then heated to 90 °C for 12 h (150 rpm). After being allowed to cool to room temperature, the mixture was diluted with DCM, filtered through a Celite plug, and concentrated *in vacuo*. The resulting mixture was dissolved in DCM (1.0 mL) and treated with Boc<sub>2</sub>O (2.0 equiv., 46  $\mu$ L) (HFIP residue can catalyze Boc protection of free amines<sup>6</sup>) or Bz<sub>2</sub>O (2.0 equiv., 45.2 mg). After being stirred at rt for 1 h, the crude mixture was concentrated *in vacuo* and purified by pTLC (hexane/EA or toluene/EA) to afford the corresponding Boc- or Bz-protected amine.

### Substrate scope for $\gamma$ -C(sp<sup>3</sup>)-H arylation

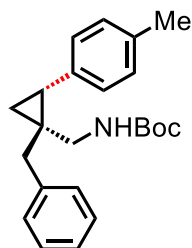

#### ***tert*-Butyl (((1*S*,2*R*)-1-benzyl-2-(*p*-tolyl)cyclopropyl)methyl)carbamate (**3a'**)**

Following **General Procedure A** on 0.1 mmol scale. Purification by pTLC (hexane/EA) afforded the title compound (colorless oil, 24.0 mg, 68% yield, 97.5:2.5 er). The enantiomeric purity was determined by SFC analysis on a Chiralpak IC column (10% IPA/CO<sub>2</sub>, 2.0 mL/min) with retention time 5.50 min (minor) and 5.91 min (major).

<sup>1</sup>H NMR (600 MHz, CDCl<sub>3</sub>)  $\delta$  7.35 – 7.31 (m, 2H), 7.29 (d,  $J$  = 7.2 Hz, 2H), 7.25 – 7.22 (m, 1H), 7.05 (d,  $J$  = 7.7 Hz, 2H), 7.02 (d,  $J$  = 7.7 Hz, 2H), 4.25 (br s, 1H), 2.92 – 2.80 (m, 2H), 2.80 – 2.70 (m, 2H), 2.29 (s, 3H), 2.15 (dd,  $J$  = 8.3, 6.3 Hz, 1H), 1.40 (s, 9H), 1.06 – 1.01 (m, 1H), 0.98 – 0.90 (m, 1H).

<sup>13</sup>C NMR (150 MHz, CDCl<sub>3</sub>)  $\delta$  155.94, 139.35, 135.82, 135.20, 129.68, 129.18, 128.68, 128.50, 126.52, 79.08, 42.85, 41.77, 29.85, 28.54, 27.68, 21.13, 14.67.

HRMS (ESI-TOF) Calcd for C<sub>18</sub>H<sub>22</sub>N [M-Boc]: 252.1752; found: 252.1753.

The absolute stereochemistry was assigned by analogy to compound **3t'**.

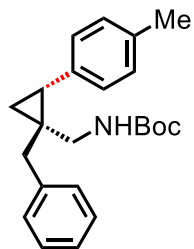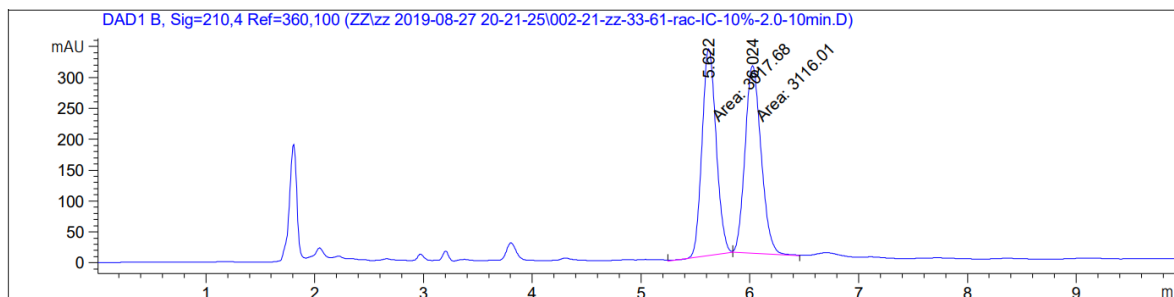

Signal 2: DAD1 B, Sig=210,4 Ref=360,100

| Peak # | RetTime [min] | Type | Width [min] | Area [mAU*s] | Height [mAU] | Area %  |
|--------|---------------|------|-------------|--------------|--------------|---------|
| 1      | 5.622         | MM   | 0.1502      | 3017.67651   | 334.90594    | 49.1984 |
| 2      | 6.024         | MM   | 0.1712      | 3116.01196   | 303.34796    | 50.8016 |

Totals : 6133.68848 638.25391

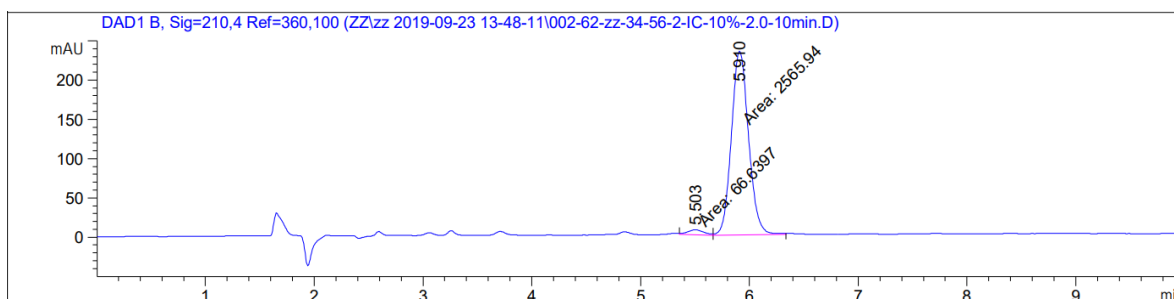

| Peak # | RetTime [min] | Type | Width [min] | Area [mAU*s] | Height [mAU] | Area %  |
|--------|---------------|------|-------------|--------------|--------------|---------|
| 1      | 5.503         | MM   | 0.1748      | 66.63972     | 6.35382      | 2.5313  |
| 2      | 5.910         | MM   | 0.1829      | 2565.94434   | 233.83130    | 97.4687 |

Totals : 2632.58405 240.18512



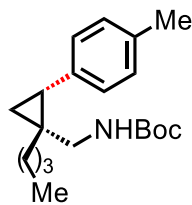

***tert*-Butyl (((1*R*,2*R*)-1-butyl-2-(*p*-tolyl)cyclopropyl)methyl)carbamate (**3b'**)**

Following **General Procedure A** on 0.1 mmol scale. Purification by pTLC (hexane/EA) afforded the title compound (colorless oil, 20.0 mg, 63% yield, 97:3 er). The enantiomeric purity was determined by SFC analysis on a Chiralpak AD column (10% IPA/CO<sub>2</sub>, 2.0 mL/min) with retention time 2.54 min (minor) and 2.80 min (major).

<sup>1</sup>H NMR (600 MHz, CDCl<sub>3</sub>) δ 7.07 (s, 4H), 4.22 (br s, 1H), 2.89 (dd, *J* = 14.1, 6.6 Hz, 1H), 2.81 (dd, *J* = 14.1, 5.2 Hz, 1H), 2.31 (s, 3H), 1.96 (dd, *J* = 8.4, 6.0 Hz, 1H), 1.52 – 1.43 (m, 4H), 1.39 (s, 9H), 1.35 – 1.31 (m, 2H), 0.99 – 0.90 (m, 4H), 0.77 (dd, *J* = 8.4, 5.1 Hz, 1H).

<sup>13</sup>C NMR (150 MHz, CDCl<sub>3</sub>) δ 156.02, 135.67, 135.63, 129.15, 128.69, 78.98, 42.41, 36.18, 28.93, 28.53, 28.26, 27.58, 23.15, 21.13, 15.58, 14.23.

HRMS (ESI-TOF) Calcd for C<sub>15</sub>H<sub>24</sub>N [M-Boc]: 218.1909; found: 218.1913.

The absolute stereochemistry was assigned by analogy to compound **3t'**.

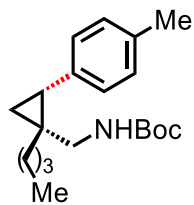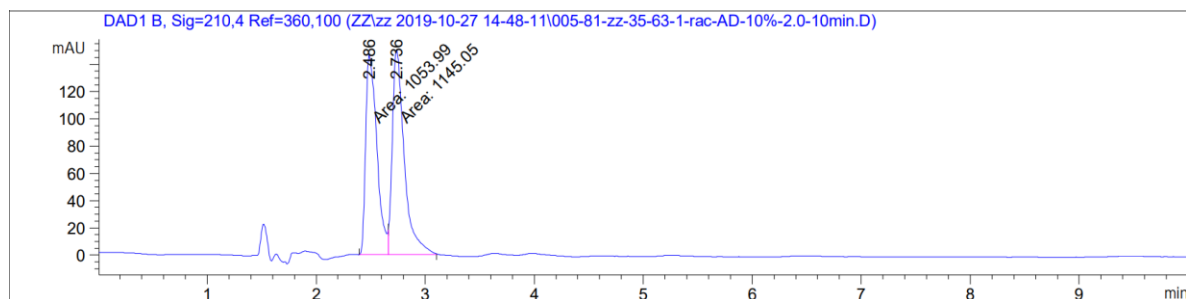

| Peak # | RetTime [min] | Type | Width [min] | Area [mAU*s] | Height [mAU] | Area %  |
|--------|---------------|------|-------------|--------------|--------------|---------|
| 1      | 2.486         | MF   | 0.1191      | 1053.99414   | 147.45099    | 47.9296 |
| 2      | 2.736         | FM   | 0.1266      | 1145.05188   | 150.70715    | 52.0704 |

Totals : 2199.04602 298.15814

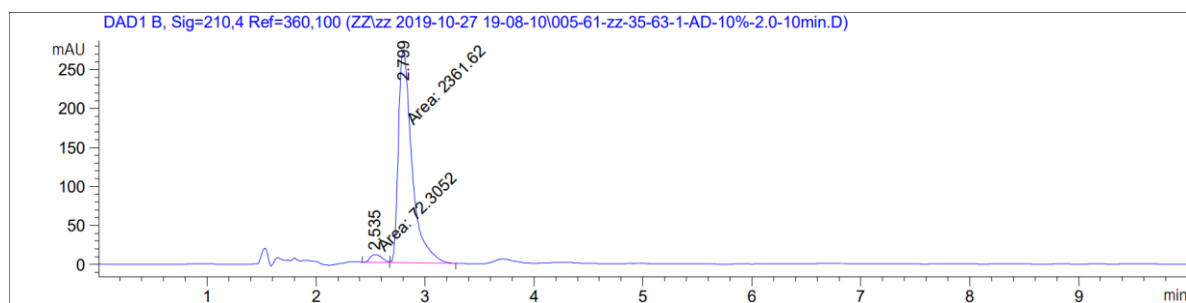

| Peak # | RetTime [min] | Type | Width [min] | Area [mAU*s] | Height [mAU] | Area %  |
|--------|---------------|------|-------------|--------------|--------------|---------|
| 1      | 2.535         | MM   | 0.1239      | 72.30518     | 9.72252      | 2.9707  |
| 2      | 2.799         | MM   | 0.1449      | 2361.62134   | 271.59396    | 97.0293 |

Totals : 2433.92651 281.31648

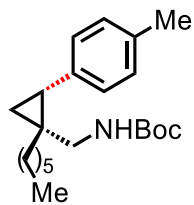

**tert-Butyl (((1R,2R)-1-hexyl-2-(p-tolyl)cyclopropyl)methyl)carbamate (3c')**

Following **General Procedure A** on 0.1 mmol scale. Purification by pTLC (hexane/EA) afforded the title compound (colorless oil, 23.0 mg, 67% yield, 97:3 er). The enantiomeric purity was determined by SFC analysis on a Chiralpak IC column (3% IPA/CO<sub>2</sub>, 2.0 mL/min) with retention time 9.27 min (minor) and 10.13 min (major).

<sup>1</sup>H NMR (600 MHz, CDCl<sub>3</sub>) δ 7.11 – 7.00 (s, 4H), 4.22 (br s, 1H), 2.89 (dd, *J* = 14.4, 6.5 Hz, 1H), 2.80 (dd, *J* = 14.4, 5.0 Hz, 1H), 2.30 (s, 3H), 1.96 (t, *J* = 7.3 Hz, 1H), 1.51 – 1.44 (m, 3H), 1.39 (s, 9H), 1.36 – 1.24 (m, 7H), 1.00 – 0.92 (m, 1H), 0.89 (t, *J* = 6.6 Hz, 3H), 0.82 – 0.70 (m, 1H).

<sup>13</sup>C NMR (150 MHz, CDCl<sub>3</sub>) δ 156.00, 135.66, 135.62, 129.14, 128.68, 78.97, 42.39, 36.48, 31.96, 29.77, 28.52, 28.25, 27.57, 26.68, 22.84, 21.13, 15.57, 14.26.

HRMS (ESI-TOF) Calcd for C<sub>17</sub>H<sub>28</sub>N [M-Boc]: 246.2222; found: 246.2225.

The absolute stereochemistry was assigned by analogy to compound **3t'**.

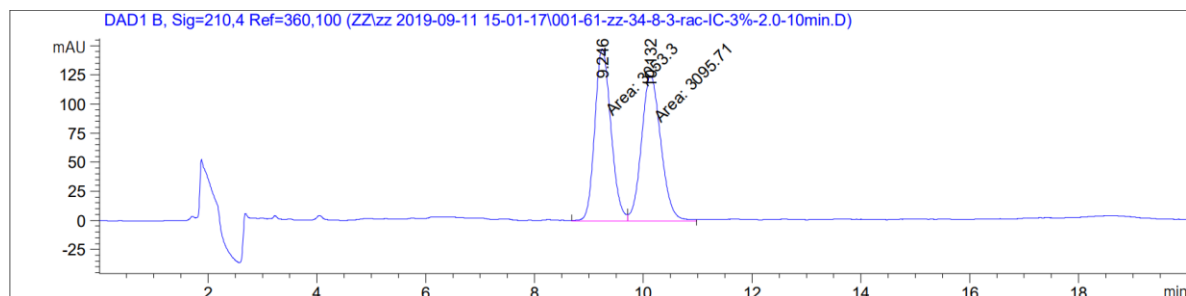

| Peak # | RetTime [min] | Type | Width [min] | Area [mAU*s] | Height [mAU] | Area %  |
|--------|---------------|------|-------------|--------------|--------------|---------|
| 1      | 9.246         | MF   | 0.3445      | 3053.29663   | 147.73560    | 49.6551 |
| 2      | 10.132        | FM   | 0.4140      | 3095.70801   | 124.61242    | 50.3449 |

Totals : 6149.00464 272.34801

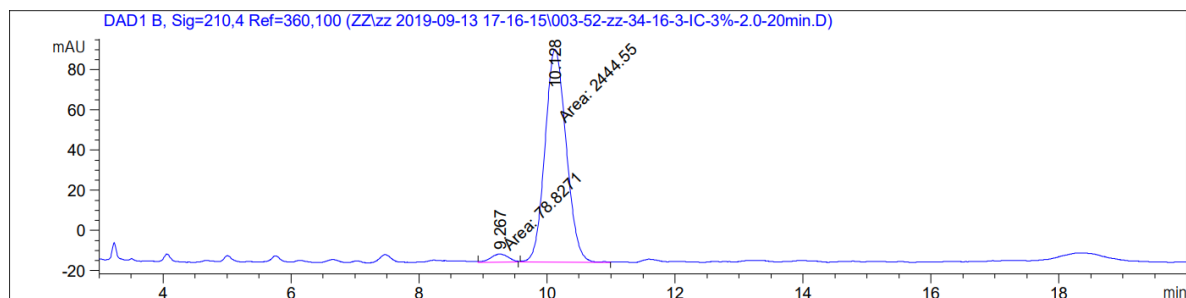

| Peak # | RetTime [min] | Type | Width [min] | Area [mAU*s] | Height [mAU] | Area %  |
|--------|---------------|------|-------------|--------------|--------------|---------|
| 1      | 9.267         | MM   | 0.3245      | 78.82707     | 4.04836      | 3.1239  |
| 2      | 10.128        | MM   | 0.3842      | 2444.54810   | 106.03723    | 96.8761 |

Totals : 2523.37517 110.08560

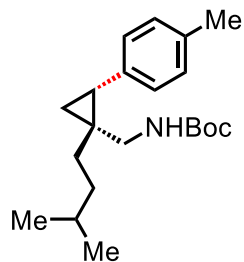

***tert*-Butyl (((1*R*,2*R*)-1-isopentyl-2-(*p*-tolyl)cyclopropyl)methyl)carbamate (**3d'**)**

Following **General Procedure A** on 0.1 mmol scale. Purification by pTLC (hexane/EA) afforded the title compound (colorless oil, 18.0 mg, 54% yield, 97.5:2.5 er). The enantiomeric purity was determined by SFC analysis on a Chiralpak AD column (10% IPA/CO<sub>2</sub>, 2.0 mL/min) with retention time 2.37 min (minor) and 2.54 min (major).

<sup>1</sup>H NMR (600 MHz, CDCl<sub>3</sub>) δ 7.07 (s, 4H), 4.20 (br s, 1H), 2.90 (dd, *J* = 14.2, 6.7 Hz, 1H), 2.80 (dd, *J* = 14.2, 5.2 Hz, 1H), 2.31 (s, 3H), 1.95 (dd, *J* = 8.4, 6.0 Hz, 1H), 1.56 – 1.48 (m, 1H), 1.48 – 1.43 (m, 2H), 1.39 (s, 9H), 1.36 – 1.27 (m, 2H), 0.94 (t, *J* = 5.6 Hz, 1H), 0.91 (d, *J* = 6.6 Hz, 6H), 0.76 (dd, *J* = 8.3, 5.1 Hz, 1H).

<sup>13</sup>C NMR (150 MHz, CDCl<sub>3</sub>) δ 155.98, 135.68, 135.63, 129.15, 128.69, 78.97, 42.34, 35.74, 34.16, 28.53, 28.46, 28.33, 27.74, 22.82, 22.73, 21.14, 15.59.

HRMS (ESI-TOF) Calcd for C<sub>16</sub>H<sub>26</sub>N [M-Boc]: 232.2065; found: 232.2066.

The absolute stereochemistry was assigned by analogy to compound **3t'**.

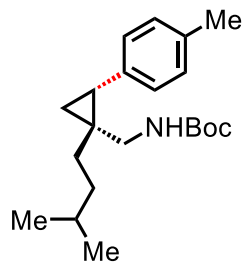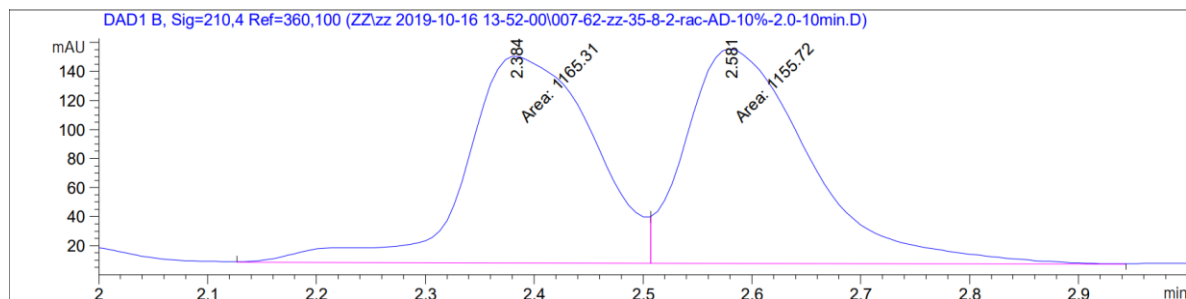

| Peak # | RetTime [min] | Type | Width [min] | Area [mAU*s] | Height [mAU] | Area %  |
|--------|---------------|------|-------------|--------------|--------------|---------|
| 1      | 2.384         | MF   | 0.1365      | 1165.30933   | 142.28049    | 50.2066 |
| 2      | 2.581         | FM   | 0.1304      | 1155.71887   | 147.69949    | 49.7934 |

Totals : 2321.02820 289.97998

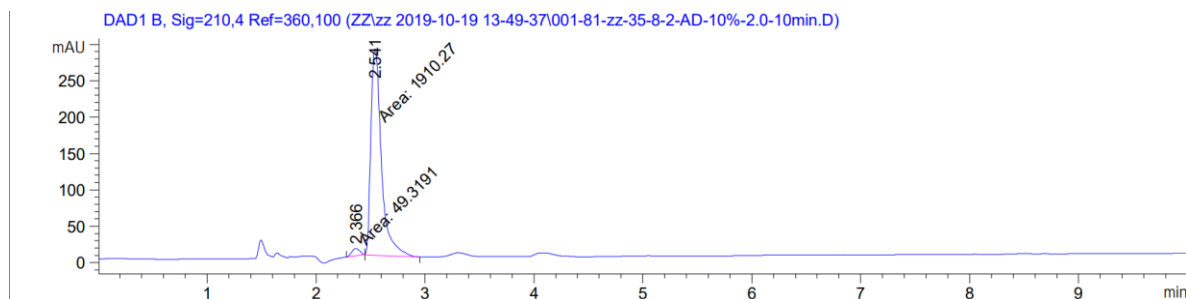

| Peak # | RetTime [min] | Type | Width [min] | Area [mAU*s] | Height [mAU] | Area %  |
|--------|---------------|------|-------------|--------------|--------------|---------|
| 1      | 2.366         | MM   | 0.0841      | 49.31909     | 9.77089      | 2.5168  |
| 2      | 2.541         | MM   | 0.1119      | 1910.26697   | 284.41635    | 97.4832 |

Totals : 1959.58606 294.18724

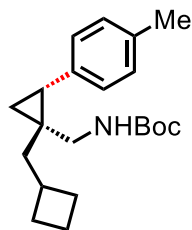

***tert*-Butyl (((1*R*,2*R*)-1-(cyclobutylmethyl)-2-(*p*-tolyl)cyclopropyl)methyl)carbamate (**3e'**)**

Following **General Procedure A** on 0.1 mmol scale. Purification by pTLC (toluene/EA) afforded the title compound (colorless oil, 20.0 mg, 61% yield, 97.5:2.5 er). The enantiomeric purity was determined by SFC analysis on a Chiralpak AD column (10% IPA/CO<sub>2</sub>, 2.0 mL/min) with retention time 3.04 min (minor) and 3.33 min (major).

<sup>1</sup>H NMR (600 MHz, CDCl<sub>3</sub>) δ 7.06 (s, 4H), 4.23 (br s, 1H), 2.85 – 2.75 (m, 2H), 2.57 (dt, *J* = 16.6, 7.8 Hz, 1H), 2.30 (s, 3H), 2.19 – 2.06 (m, 2H), 2.03 – 1.95 (m, 1H), 1.95 – 1.85 (m, 1H), 1.84 – 1.73 (m, 2H), 1.73 – 1.63 (m, 2H), 1.40 (s, 10H), 0.91 (t, *J* = 5.3 Hz, 1H), 0.75 (dd, *J* = 8.3, 5.3 Hz, 1H).

<sup>13</sup>C NMR (150 MHz, CDCl<sub>3</sub>) δ 155.99, 135.69, 135.58, 129.13, 128.73, 79.00, 43.39, 42.93, 34.28, 29.64, 29.56, 28.54, 27.59, 26.33, 21.14, 19.25, 14.92.

HRMS (ESI-TOF) Calcd for C<sub>16</sub>H<sub>24</sub>N [M-Boc]: 230.1909; found: 230.1910.

The absolute stereochemistry was assigned by analogy to compound **3t'**.

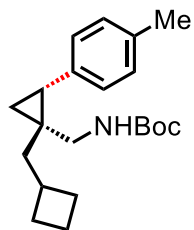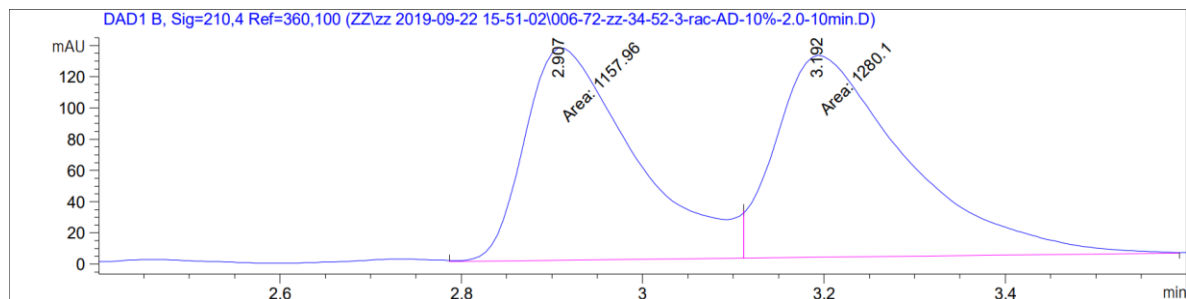

| Peak # | RetTime [min] | Type | Width [min] | Area [mAU*s] | Height [mAU] | Area %  |
|--------|---------------|------|-------------|--------------|--------------|---------|
| 1      | 2.907         | MF   | 0.1416      | 1157.96472   | 136.31445    | 47.4952 |
| 2      | 3.192         | FM   | 0.1649      | 1280.10205   | 129.40999    | 52.5048 |

Totals : 2438.06677 265.72444

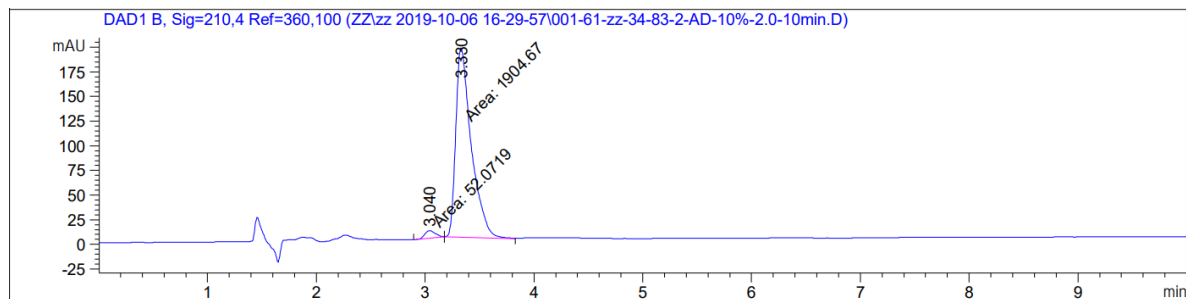

| Peak # | RetTime [min] | Type | Width [min] | Area [mAU*s] | Height [mAU] | Area %  |
|--------|---------------|------|-------------|--------------|--------------|---------|
| 1      | 3.040         | MM   | 0.1123      | 52.07194     | 7.72780      | 2.6612  |
| 2      | 3.330         | MM   | 0.1654      | 1904.66663   | 191.91554    | 97.3388 |

Totals : 1956.73857 199.64334



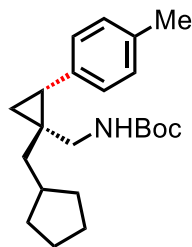

***tert*-Butyl (((1*R*,2*R*)-1-(cyclopentylmethyl)-2-(*p*-tolyl)cyclopropyl)methyl)carbamate (**3f'**)**

Following **General Procedure A** on 0.1 mmol scale. Purification by pTLC (hexane/EA) afforded the title compound (colorless oil, 19.0 mg, 55% yield, 97.5:2.5 er). The enantiomeric purity was determined by SFC analysis on a Chiralpak AD column (7% IPA/CO<sub>2</sub>, 2.0 mL/min) with retention time 3.89 min (minor) and 4.37 min (major).

<sup>1</sup>H NMR (600 MHz, CDCl<sub>3</sub>) δ 7.08 (s, 4H), 4.23 (br s, 1H), 2.98 – 2.89 (m, 1H), 2.89 – 2.80 (m, 1H), 2.31 (s, 3H), 2.10 – 2.02 (m, 1H), 2.02 – 1.95 (m, 1H), 1.95 – 1.86 (m, 1H), 1.86 – 1.80 (m, 1H), 1.67 – 1.60 (m, 2H), 1.59 – 1.51 (m, 3H), 1.39 (s, 9H), 1.24 – 1.15 (m, 1H), 1.15 – 1.07 (m, 1H), 0.96 (t, *J* = 5.6 Hz, 1H), 0.90 – 0.81 (m, 1H), 0.77 (dd, *J* = 8.2, 5.9 Hz, 1H).

<sup>13</sup>C NMR (150 MHz, CDCl<sub>3</sub>) δ 155.99, 135.69, 135.63, 129.14, 128.67, 79.01, 42.52, 38.22, 33.56, 33.40, 29.85, 28.52, 28.30, 26.94, 25.12, 21.14, 15.51 (1 carbon signal was not assigned due to overlaps).

HRMS (ESI-TOF) Calcd for C<sub>17</sub>H<sub>26</sub>N [M-Boc]: 244.2065; found: 244.2065.

The absolute stereochemistry was assigned by analogy to compound **3t'**.

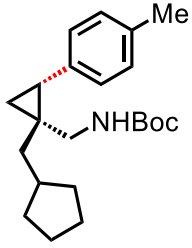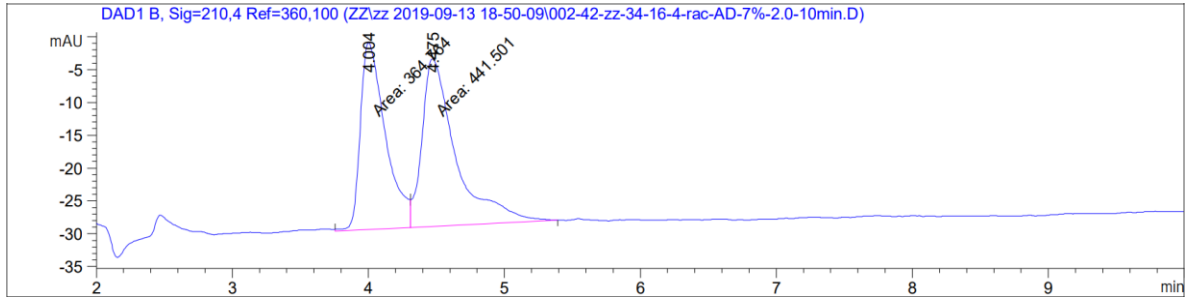

| Peak # | RetTime [min] | Type | Width [min] | Area [mAU*s] | Height [mAU] | Area %  |
|--------|---------------|------|-------------|--------------|--------------|---------|
| 1      | 4.004         | MF   | 0.2137      | 364.76437    | 28.45213     | 45.2412 |
| 2      | 4.475         | FM   | 0.2880      | 441.50079    | 25.54582     | 54.7588 |

Totals : 806.26517 53.99795

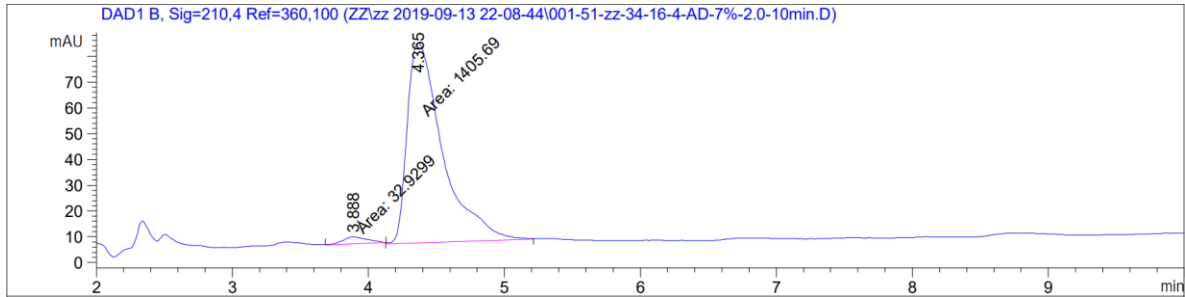

| Peak # | RetTime [min] | Type | Width [min] | Area [mAU*s] | Height [mAU] | Area %  |
|--------|---------------|------|-------------|--------------|--------------|---------|
| 1      | 3.888         | MM   | 0.2052      | 32.92994     | 2.67472      | 2.2890  |
| 2      | 4.365         | MM   | 0.3021      | 1405.69324   | 77.56008     | 97.7110 |

Totals : 1438.62318 80.23480

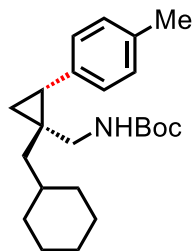

***tert*-Butyl (((1*R*,2*R*)-1-(cyclohexylmethyl)-2-(*p*-tolyl)cyclopropyl)methyl)carbamate (**3g'**)**

Following **General Procedure A** on 0.1 mmol scale. Purification by pTLC (hexane/EA) afforded the title compound (colorless oil, 25.0 mg, 70% yield, 98:2 er). The enantiomeric purity was determined by SFC analysis on a Chiralpak AD column (7% IPA/CO<sub>2</sub>, 2.0 mL/min) with retention time 4.19 min (minor) and 4.70 min (major).

<sup>1</sup>H NMR (600 MHz, CDCl<sub>3</sub>) δ 7.08 (s, 4H), 4.21 (br s, 1H), 3.01 (dd, *J* = 14.3, 6.9 Hz, 1H), 2.78 (dd, *J* = 14.3, 4.9 Hz, 1H), 2.31 (s, 3H), 1.98 – 1.89 (m, 1H), 1.89 – 1.75 (m, 2H), 1.75 – 1.63 (m, 3H), 1.63 – 1.58 (m, 1H), 1.39 (s, 9H), 1.33 – 1.21 (m, 4H), 1.20 – 1.11 (m, 1H), 0.98 (t, *J* = 5.6 Hz, 1H), 0.96 – 0.85 (m, 2H), 0.75 (dd, *J* = 8.1, 5.3 Hz, 1H).

<sup>13</sup>C NMR (150 MHz, CDCl<sub>3</sub>) δ 155.94, 135.66, 135.60, 129.15, 128.58, 78.98, 44.42, 42.19, 35.52, 34.11, 34.07, 28.52, 28.39, 26.77, 26.42, 25.78, 21.12, 15.70 (1 carbon signal was not assigned due to overlaps).

HRMS (ESI-TOF) Calcd for C<sub>18</sub>H<sub>28</sub>N [M-Boc]: 258.2222; found: 258.2226.

The absolute stereochemistry was assigned by analogy to compound **3t'**.

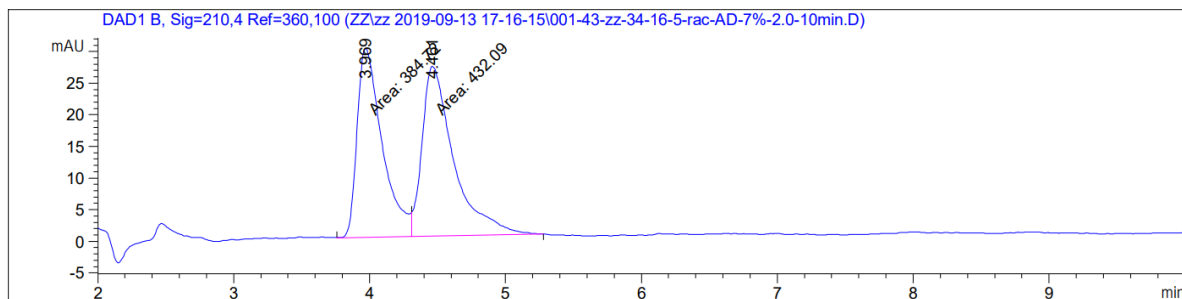

| Peak # | RetTime [min] | Type | Width [min] | Area [mAU*s] | Height [mAU] | Area %  |
|--------|---------------|------|-------------|--------------|--------------|---------|
| 1      | 3.969         | MF   | 0.2145      | 384.71997    | 29.89201     | 47.1003 |
| 2      | 4.461         | FM   | 0.2686      | 432.09021    | 26.81486     | 52.8997 |

Totals : 816.81018 56.70687

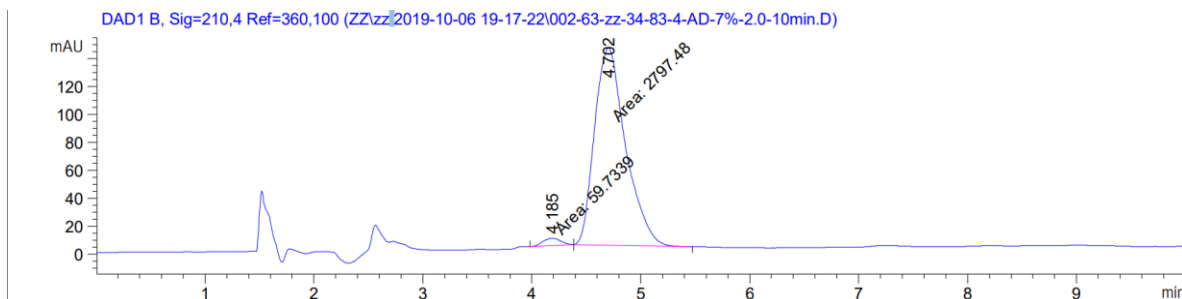

| Peak # | RetTime [min] | Type | Width [min] | Area [mAU*s] | Height [mAU] | Area %  |
|--------|---------------|------|-------------|--------------|--------------|---------|
| 1      | 4.185         | MM   | 0.1899      | 59.73391     | 5.24326      | 2.0906  |
| 2      | 4.702         | MM   | 0.3302      | 2797.47827   | 141.22035    | 97.9094 |

Totals : 2857.21218 146.46362

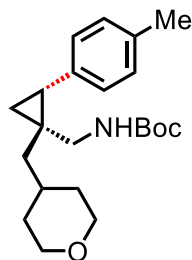

***tert*-Butyl (((1*R*,2*R*)-1-((tetrahydro-2*H*-pyran-4-yl)methyl)-2-(*p*-tolyl)cyclopropyl)methyl) carbamate (**3h'**)**

Following **General Procedure A** on 0.1 mmol scale. Purification by pTLC (hexane/EA) afforded the title compound (colorless oil, 21.0 mg, 58% yield, 98.5:1.5 er). The enantiomeric purity was determined by SFC analysis on a Chiralpak IC column (10% IPA/CO<sub>2</sub>, 2.0 mL/min) with retention time 9.44 min (major) and 11.63 min (minor).

<sup>1</sup>H NMR (600 MHz, CDCl<sub>3</sub>) δ 7.09 (d, *J* = 8.2 Hz, 2H), 7.07 (d, *J* = 8.2 Hz, 2H), 4.18 (br s, 1H), 4.00 – 3.92 (m, 2H), 3.47 – 3.39 (m, 2H), 3.09 (dd, *J* = 14.3, 7.0 Hz, 1H), 2.75 (dd, *J* = 14.3, 4.9 Hz, 1H), 2.31 (s, 3H), 1.98 – 1.88 (m, 2H), 1.76 – 1.66 (m, 2H), 1.39 (s, 9H), 1.38 – 1.31 (m, 2H), 1.31 – 1.24 (m, 2H), 0.99 (t, *J* = 5.6 Hz, 1H), 0.79 (dd, *J* = 8.5, 5.3 Hz, 1H).

<sup>13</sup>C NMR (150 MHz, CDCl<sub>3</sub>) δ 155.95, 135.88, 135.28, 129.25, 128.53, 79.12, 68.19, 68.15, 43.89, 41.98, 33.93, 33.59, 32.92, 28.51, 25.59, 21.13, 15.56, 13.76.

HRMS (ESI-TOF) Calcd for C<sub>17</sub>H<sub>26</sub>NO [M-Boc]: 260.2014; found: 260.2020.

The absolute stereochemistry was assigned by analogy to compound **3t'**.

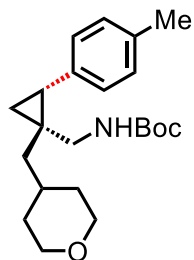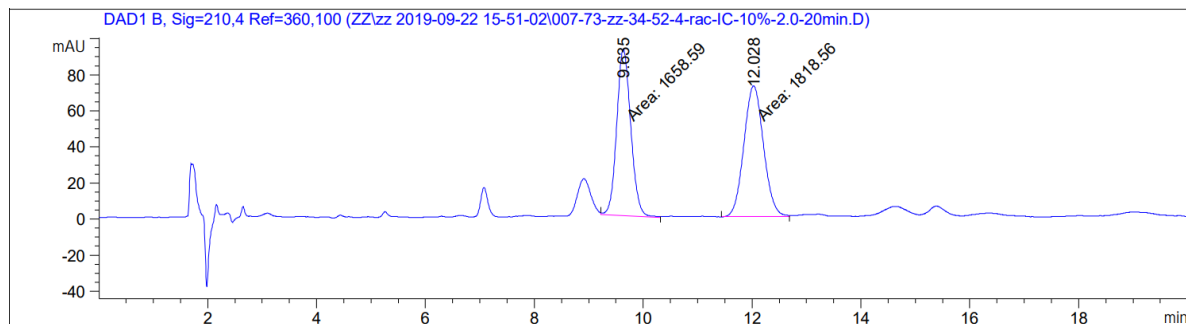

| Peak # | RetTime [min] | Type | Width [min] | Area [mAU*s] | Height [mAU] | Area %  |
|--------|---------------|------|-------------|--------------|--------------|---------|
| 1      | 9.635         | MM   | 0.2994      | 1658.59436   | 92.32034     | 47.6997 |
| 2      | 12.028        | MM   | 0.4178      | 1818.56433   | 72.54531     | 52.3003 |

Totals : 3477.15869 164.86565

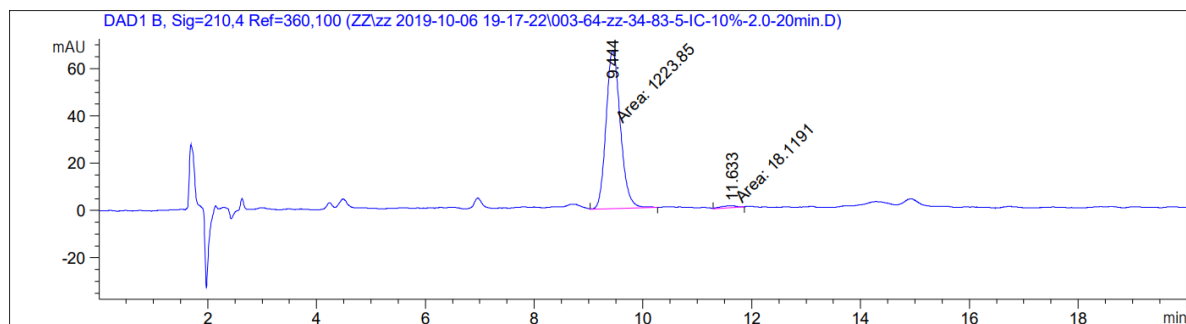

| Peak # | RetTime [min] | Type | Width [min] | Area [mAU*s] | Height [mAU] | Area %  |
|--------|---------------|------|-------------|--------------|--------------|---------|
| 1      | 9.444         | MM   | 0.3046      | 1223.84570   | 66.95682     | 98.5411 |
| 2      | 11.633        | MM   | 0.2804      | 18.11912     | 7.69049e-1   | 1.4589  |

Totals : 1241.96482 67.72587

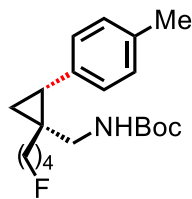

***tert*-Butyl (((1*R*,2*R*)-1-(4-fluorobutyl)-2-(*p*-tolyl)cyclopropyl)methyl)carbamate (**3i'**)**

Following **General Procedure A** on 0.1 mmol scale. Purification by pTLC (hexane/EA) afforded the title compound (colorless oil, 22.0 mg, 66% yield, 97:3 er). The enantiomeric purity was determined by SFC analysis on a Chiralpak IC column (5% IPA/CO<sub>2</sub>, 2.0 mL/min) with retention time 6.92 min (major) and 8.81 min (minor).

<sup>1</sup>H NMR (600 MHz, CDCl<sub>3</sub>) δ 7.08 (d, *J* = 8.5 Hz, 2H), 7.07 (d, *J* = 8.5 Hz, 2H), 4.47 (dt, *J* = 47.3, 6.2 Hz, 2H), 4.21 (br s, 1H), 2.94 (dd, *J* = 14.3, 6.8 Hz, 1H), 2.78 (dd, *J* = 14.3, 5.3 Hz, 1H), 2.31 (s, 3H), 1.98 (dd, *J* = 8.5, 6.0 Hz, 1H), 1.79 – 1.67 (m, 2H), 1.66 – 1.60 (m, 2H), 1.53 – 1.46 (m, 1H), 1.42 – 1.36 (m, 10H), 0.97 (t, *J* = 5.6 Hz, 1H), 0.79 (dd, *J* = 8.5, 5.2 Hz, 1H).

<sup>13</sup>C NMR (150 MHz, CDCl<sub>3</sub>) δ 156.04, 135.81, 135.36, 129.20, 128.67, 84.29 (d, *J* = 164.1 Hz), 79.09, 42.24, 36.10, 30.79 (d, *J* = 19.4 Hz), 28.51, 28.26, 22.52 (d, *J* = 6.2 Hz), 21.13, 18.72, 15.49.

HRMS (ESI-TOF) Calcd for C<sub>15</sub>H<sub>23</sub>FN [M-Boc]: 236.1815; found: 236.1818.

The absolute stereochemistry was assigned by analogy to compound **3t'**.

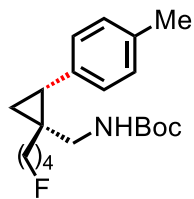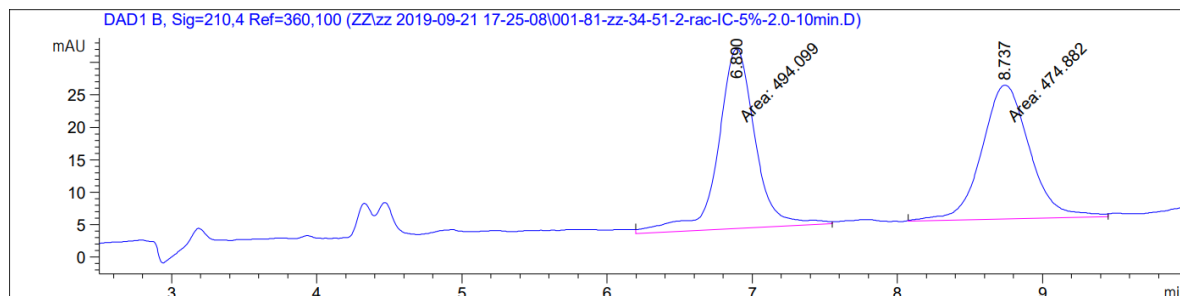

| Peak # | RetTime [min] | Type | Width [min] | Area [mAU*s] | Height [mAU] | Area %  |
|--------|---------------|------|-------------|--------------|--------------|---------|
| 1      | 6.890         | MM   | 0.2962      | 494.09866    | 27.80464     | 50.9916 |
| 2      | 8.737         | MM   | 0.3829      | 474.88190    | 20.66815     | 49.0084 |

Totals : 968.98056 48.47279

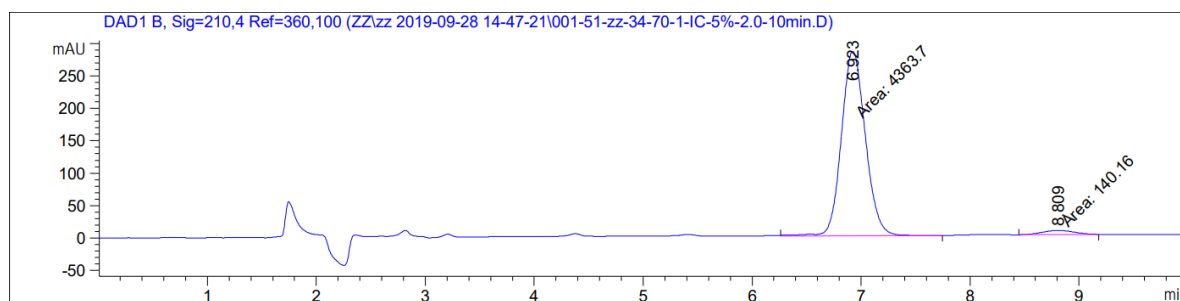

| Peak # | RetTime [min] | Type | Width [min] | Area [mAU*s] | Height [mAU] | Area %  |
|--------|---------------|------|-------------|--------------|--------------|---------|
| 1      | 6.923         | MM   | 0.2551      | 4363.70313   | 285.05414    | 96.8880 |
| 2      | 8.809         | MM   | 0.3553      | 140.16045    | 6.57462      | 3.1120  |

Totals : 4503.86357 291.62876



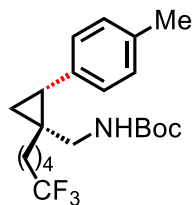

***tert*-Butyl (((1*R*,2*R*)-2-(*p*-tolyl)-1-(5,5,5-trifluoropentyl)cyclopropyl)methyl)carbamate (**3j'**)**

Following **General Procedure A** on 0.1 mmol scale. Purification by pTLC (hexane/EA) afforded the title compound (colorless oil, 25.0 mg, 65% yield, 96:4 er). The enantiomeric purity was determined by SFC analysis on a Chiralpak OD column (3% IPA/CO<sub>2</sub>, 2.0 mL/min) with retention time 4.04 min (minor) and 4.72 min (major).

<sup>1</sup>H NMR (600 MHz, CDCl<sub>3</sub>) δ 7.09 (d, *J* = 8.1 Hz, 2H), 7.06 (d, *J* = 8.1 Hz, 2H), 4.20 (br s, 1H), 2.95 (dd, *J* = 14.2, 6.8 Hz, 1H), 2.76 (dd, *J* = 14.2, 5.2 Hz, 1H), 2.31 (s, 3H), 2.16 – 2.05 (m, 2H), 1.96 (dd, *J* = 8.5, 6.0 Hz, 1H), 1.65 – 1.54 (m, 5H), 1.42 – 1.34 (m, 10H), 0.96 (t, *J* = 5.6 Hz, 1H), 0.78 (dd, *J* = 8.5, 5.2 Hz, 1H).

<sup>13</sup>C NMR (150 MHz, CDCl<sub>3</sub>) δ 156.06, 135.88, 135.27, 129.23, 128.64, 127.38 (q, *J* = 276.3 Hz), 79.15, 42.10, 35.98, 33.83 (q, *J* = 28.6 Hz), 28.49, 28.33, 27.53, 25.84, 22.18 (q, *J* = 3.0 Hz), 21.13, 15.42.

HRMS (ESI-TOF) Calcd for C<sub>16</sub>H<sub>23</sub>F<sub>3</sub>N [M-Boc]: 286.1783; found: 286.1785.

The absolute stereochemistry was assigned by analogy to compound **3t'**.

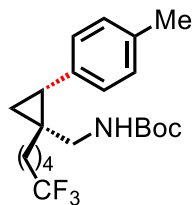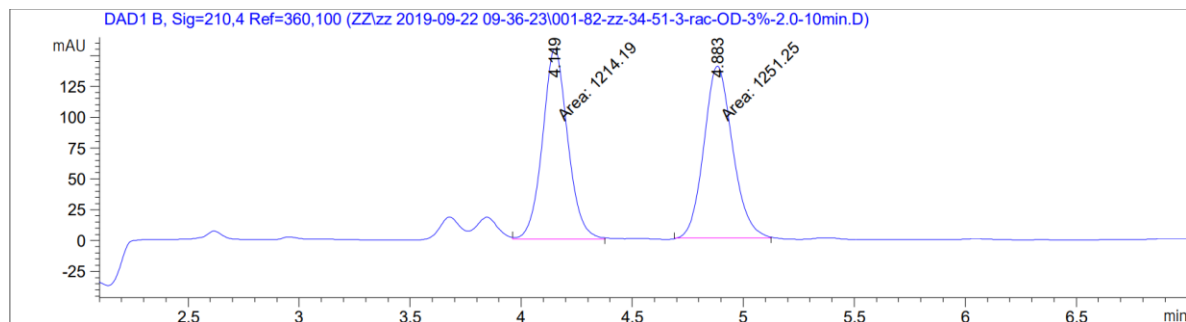

| Peak # | RetTime [min] | Type | Width [min] | Area [mAU*s] | Height [mAU] | Area %  |
|--------|---------------|------|-------------|--------------|--------------|---------|
| 1      | 4.149         | MM   | 0.1309      | 1214.18713   | 154.60463    | 49.2484 |
| 2      | 4.883         | MM   | 0.1493      | 1251.24866   | 139.66620    | 50.7516 |

Totals : 2465.43579 294.27083

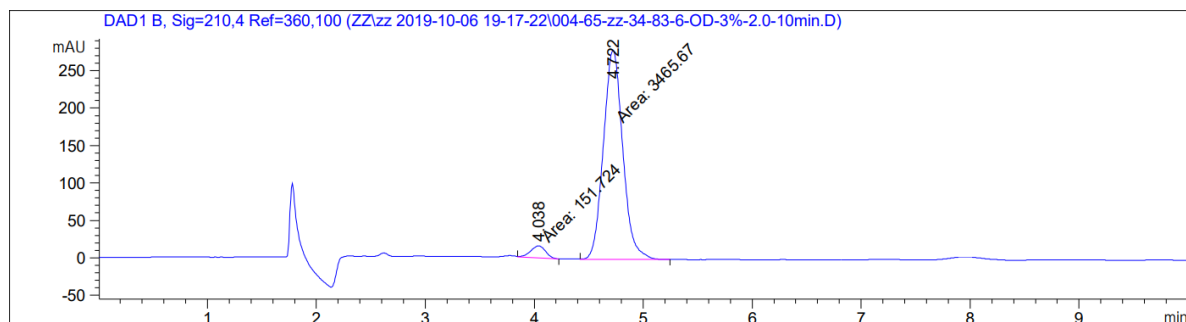

| Peak # | RetTime [min] | Type | Width [min] | Area [mAU*s] | Height [mAU] | Area %  |
|--------|---------------|------|-------------|--------------|--------------|---------|
| 1      | 4.038         | MM   | 0.1569      | 151.72357    | 16.12165     | 4.1943  |
| 2      | 4.722         | MM   | 0.2066      | 3465.66724   | 279.58203    | 95.8057 |

Totals : 3617.39081 295.70368

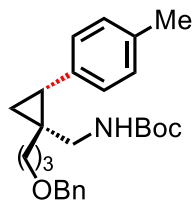

***tert*-Butyl (((1*R*,2*R*)-1-(3-(benzyloxy)propyl)-2-(*p*-tolyl)cyclopropyl)methyl)carbamate (**3k'**)**

Following **General Procedure A** on 0.1 mmol scale. Purification by pTLC (hexane/EA) afforded the title compound (colorless oil, 19.5 mg, 48% yield, 97:3 er). The enantiomeric purity was determined by SFC analysis on a Chiralpak OD column (20% IPA/CO<sub>2</sub>, 2.0 mL/min) with retention time 3.77 min (minor) and 4.27 min (major).

<sup>1</sup>H NMR (600 MHz, CDCl<sub>3</sub>) δ 7.38 – 7.30 (m, 4H), 7.31 – 7.26 (m, 1H), 7.06 (s, 4H), 4.52 (s, 2H), 4.26 (br s, 1H), 3.52 (t, *J* = 6.4 Hz, 2H), 2.91 (dd, *J* = 14.6, 6.7 Hz, 1H), 2.80 (dd, *J* = 14.6, 4.6 Hz, 1H), 2.30 (s, 3H), 1.98 (t, *J* = 7.4 Hz, 1H), 1.90 – 1.72 (m, 3H), 1.49 – 1.41 (m, 1H), 1.38 (s, 9H), 1.00 – 0.91 (m, 1H), 0.84 – 0.73 (m, 1H).

<sup>13</sup>C NMR (150 MHz, CDCl<sub>3</sub>) δ 156.04, 138.75, 135.74, 135.43, 129.17, 128.69, 128.50, 127.80, 127.65, 79.04, 72.97, 70.49, 42.32, 32.93, 28.52, 28.24, 27.28, 27.00, 21.13, 15.59.

HRMS (ESI-TOF) Calcd for C<sub>21</sub>H<sub>28</sub>NO [M-Boc]: 310.2171; found: 310.2171.

The absolute stereochemistry was assigned by analogy to compound **3t'**.

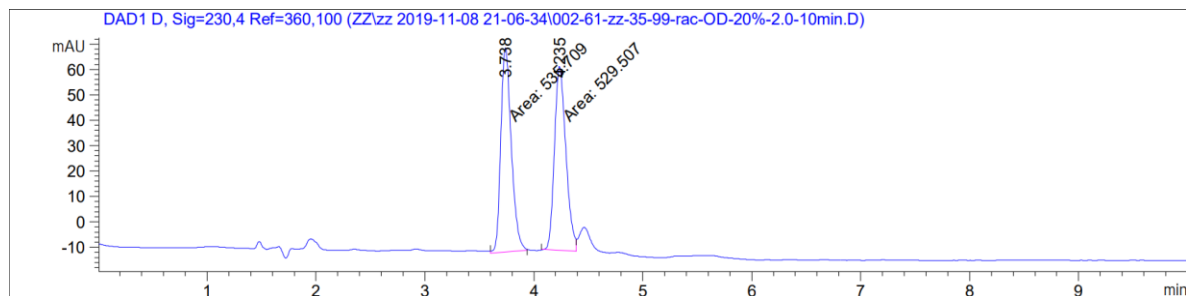

| Peak # | RetTime [min] | Type | Width [min] | Area [mAU*s] | Height [mAU] | Area %  |
|--------|---------------|------|-------------|--------------|--------------|---------|
| 1      | 3.738         | MM   | 0.1112      | 535.70868    | 80.30118     | 50.2911 |
| 2      | 4.235         | MF   | 0.1218      | 529.50677    | 72.45930     | 49.7089 |

Totals : 1065.21545 152.76048

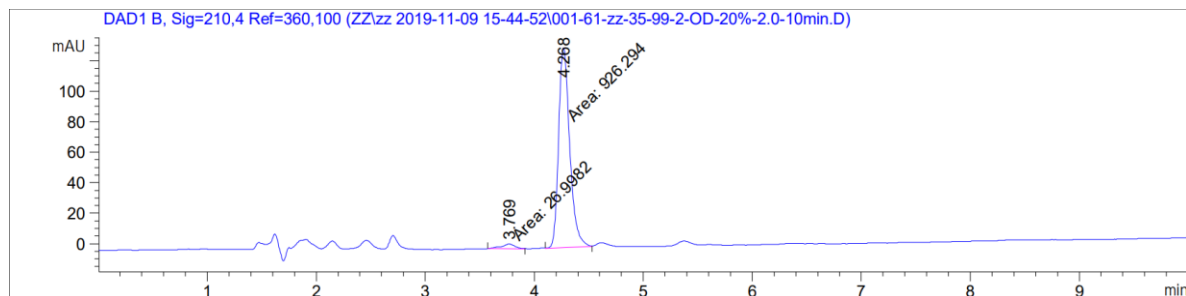

| Peak # | RetTime [min] | Type | Width [min] | Area [mAU*s] | Height [mAU] | Area %  |
|--------|---------------|------|-------------|--------------|--------------|---------|
| 1      | 3.769         | MM   | 0.1432      | 26.99818     | 3.14201      | 2.8321  |
| 2      | 4.268         | MM   | 0.1176      | 926.29449    | 131.32811    | 97.1679 |

Totals : 953.29268 134.47012

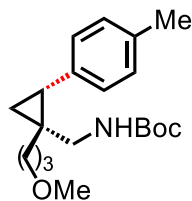

***tert*-Butyl (((1*R*,2*R*)-1-(3-methoxypropyl)-2-(*p*-tolyl)cyclopropyl)methyl)carbamate (**3l'**)**

Following **General Procedure A** on 0.1 mmol scale. Purification by pTLC (hexane/EA) afforded the title compound (colorless oil, 18.0 mg, 54% yield, 97.5:2.5 er). The enantiomeric purity was determined by SFC analysis on a Chiralpak AD column (10% IPA/CO<sub>2</sub>, 2.0 mL/min) with retention time 3.88 min (minor) and 4.53 min (major).

<sup>1</sup>H NMR (600 MHz, CDCl<sub>3</sub>) δ 7.07 (s, 4H), 4.26 (br s, 1H), 3.42 (t, *J* = 6.3 Hz, 2H), 3.34 (s, 3H), 2.92 (dd, *J* = 15.1, 6.2 Hz, 1H), 2.84 – 2.74 (m, 1H), 2.31 (s, 3H), 1.99 (dd, *J* = 8.5, 6.1 Hz, 1H), 1.85 – 1.71 (m, 2H), 1.72 – 1.62 (m, 1H), 1.56 – 1.49 (m, 1H), 1.39 (s, 9H), 0.97 (t, *J* = 5.7 Hz, 1H), 0.80 (dd, *J* = 8.5, 5.2 Hz, 1H).

<sup>13</sup>C NMR (150 MHz, CDCl<sub>3</sub>) δ 156.05, 135.76, 135.43, 129.18, 128.69, 79.04, 72.85, 58.62, 42.28, 32.87, 28.51, 28.27, 26.84, 21.13, 15.57, 10.64.

HRMS (ESI-TOF) Calcd for C<sub>15</sub>H<sub>24</sub>NO [M-Boc]: 234.1858; found: 234.1863.

The absolute stereochemistry was assigned by analogy to compound **3t'**.

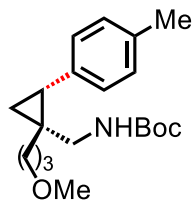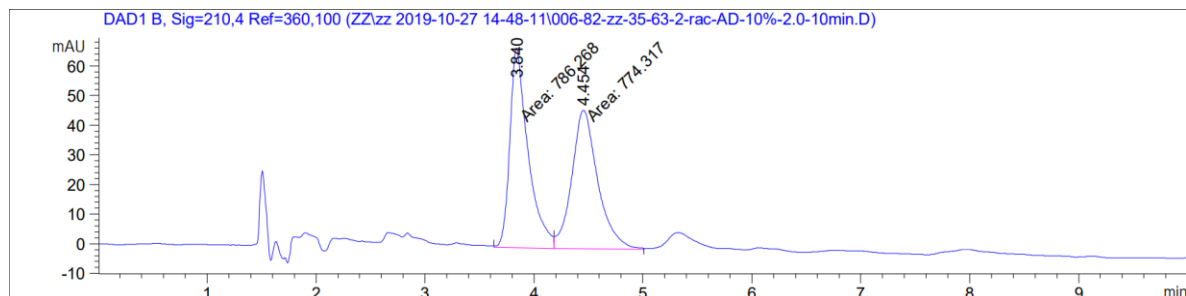

| Peak # | RetTime [min] | Type | Width [min] | Area [mAU*s] | Height [mAU] | Area %  |
|--------|---------------|------|-------------|--------------|--------------|---------|
| 1      | 3.840         | MF   | 0.1943      | 786.26825    | 67.44659     | 50.3829 |
| 2      | 4.454         | FM   | 0.2764      | 774.31677    | 46.68417     | 49.6171 |

Totals : 1560.58502 114.13076

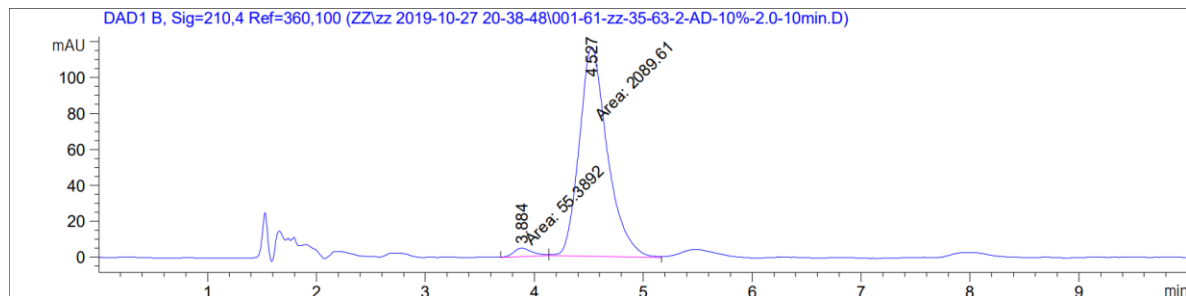

| Peak # | RetTime [min] | Type | Width [min] | Area [mAU*s] | Height [mAU] | Area %  |
|--------|---------------|------|-------------|--------------|--------------|---------|
| 1      | 3.884         | MM   | 0.1939      | 55.38919     | 4.76218      | 2.5822  |
| 2      | 4.527         | MM   | 0.2989      | 2089.61230   | 116.50014    | 97.4178 |

Totals : 2145.00150 121.26232

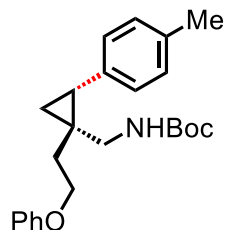

***tert*-Butyl (((1*S*,2*R*)-1-(2-phenoxyethyl)-2-(*p*-tolyl)cyclopropyl)methyl)carbamate (**3m'**)**

Following **General Procedure A** on 0.1 mmol scale. Purification by pTLC (hexane/EA) afforded the title compound (colorless oil, 17.0 mg, 45% yield, 96.5:3.5 er). The enantiomeric purity was determined by SFC analysis on a Chiralpak IC column (15% IPA/CO<sub>2</sub>, 2.0 mL/min) with retention time 4.62 min (minor) and 5.10 min (major).

<sup>1</sup>H NMR (600 MHz, CDCl<sub>3</sub>) δ 7.29 (dd, *J* = 8.8, 7.2 Hz, 2H), 7.10 (d, *J* = 8.2 Hz, 2H), 7.07 (d, *J* = 8.2 Hz, 2H), 7.00 – 6.90 (m, 3H), 4.49 (br s, 1H), 4.27 – 4.20 (m, 1H), 4.20 – 4.12 (m, 1H), 2.93 (dd, *J* = 14.4, 6.7 Hz, 1H), 2.87 (dd, *J* = 14.4, 5.2 Hz, 1H), 2.31 (s, 3H), 2.18 – 2.12 (m, 1H), 2.07 – 2.00 (m, 1H), 1.89 – 1.81 (m, 1H), 1.39 (s, 9H), 1.04 (t, *J* = 5.7 Hz, 1H), 0.91 (dd, *J* = 8.5, 5.3 Hz, 1H).

<sup>13</sup>C NMR (150 MHz, CDCl<sub>3</sub>) δ 158.92, 135.92, 135.14, 129.61, 129.21, 128.82, 120.81, 114.67, 114.56, 79.12, 66.07, 42.98, 35.99, 28.53, 28.31, 27.57, 21.15, 15.47.

HRMS (ESI-TOF) Calcd for C<sub>19</sub>H<sub>24</sub>NO [M-Boc]: 282.1858; found: 282.1864.

The absolute stereochemistry was assigned by analogy to compound **3t'**.

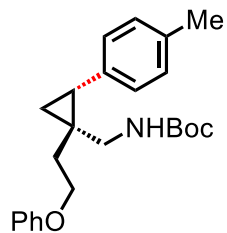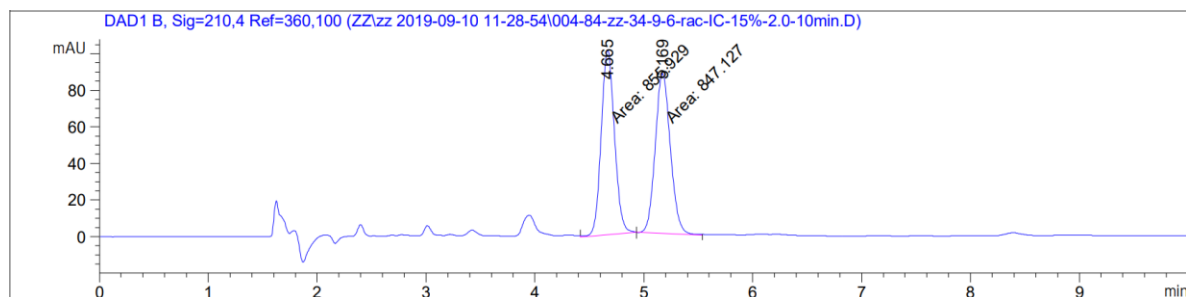

| Peak # | RetTime [min] | Type | Width [min] | Area [mAU*s] | Height [mAU] | Area %  |
|--------|---------------|------|-------------|--------------|--------------|---------|
| 1      | 4.665         | MM   | 0.1408      | 855.92877    | 101.32438    | 50.2584 |
| 2      | 5.169         | MM   | 0.1614      | 847.12720    | 87.49296     | 49.7416 |

Totals : 1703.05597 188.81734

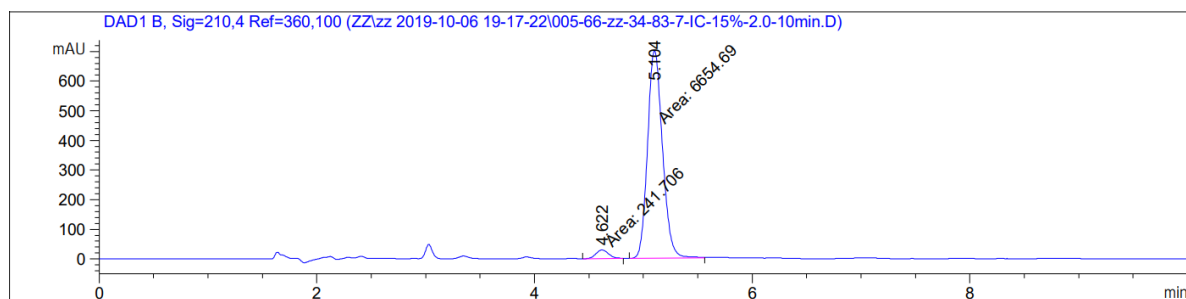

| Peak # | RetTime [min] | Type | Width [min] | Area [mAU*s] | Height [mAU] | Area %  |
|--------|---------------|------|-------------|--------------|--------------|---------|
| 1      | 4.622         | MM   | 0.1364      | 241.70641    | 29.53849     | 3.5048  |
| 2      | 5.104         | MM   | 0.1582      | 6654.69189   | 701.03290    | 96.4952 |

Totals : 6896.39830 730.57139



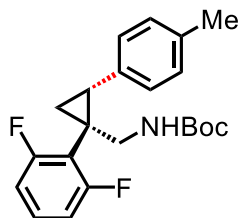

***tert*-Butyl (((1*R*,2*R*)-1-(2,6-difluorophenyl)-2-(*p*-tolyl)cyclopropyl)methyl)carbamate (**3n'**)**

Following **General Procedure A** on 0.1 mmol scale. Purification by pTLC (hexane/EA) afforded the title compound (colorless oil, 18.0 mg, 48% yield, 99:1 er). The enantiomeric purity was determined by SFC analysis on a Chiralpak IC column (10% IPA/CO<sub>2</sub>, 2.0 mL/min) with retention time 4.67 min (minor) and 5.40 min (major).

<sup>1</sup>H NMR (600 MHz, CDCl<sub>3</sub>) δ 7.31 (d, *J* = 7.8 Hz, 2H), 7.25 – 7.16 (m, 1H), 7.15 (d, *J* = 7.8 Hz, 2H), 6.89 (t, *J* = 8.3 Hz, 2H), 4.43 (br s, 1H), 3.17 (dd, *J* = 14.2, 7.2 Hz, 1H), 2.91 (dd, *J* = 14.2, 4.8 Hz, 1H), 2.53 – 2.42 (m, 1H), 2.34 (s, 3H), 1.52 (t, *J* = 6.3 Hz, 1H), 1.38 – 1.33 (m, 1H), 1.28 (s, 9H).

<sup>13</sup>C NMR (150 MHz, CDCl<sub>3</sub>) δ 162.97 (dd, *J* = 248.4, 7.9 Hz), 155.82, 136.36, 134.26, 129.31, 129.04, 128.79 (t, *J* = 10.5 Hz), 119.48 (t, *J* = 17.3 Hz), 111.58 (dd, *J* = 25.9, 3.4 Hz), 78.96, 44.81, 28.38, 28.24, 22.66, 21.22, 15.65.

HRMS (ESI-TOF) Calcd for C<sub>17</sub>H<sub>18</sub>F<sub>2</sub>N [M-Boc]: 274.1407; found: 274.1407.

The absolute stereochemistry was assigned by analogy to compound **3t'**.

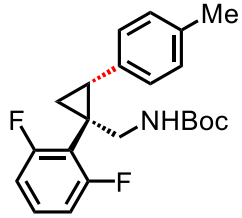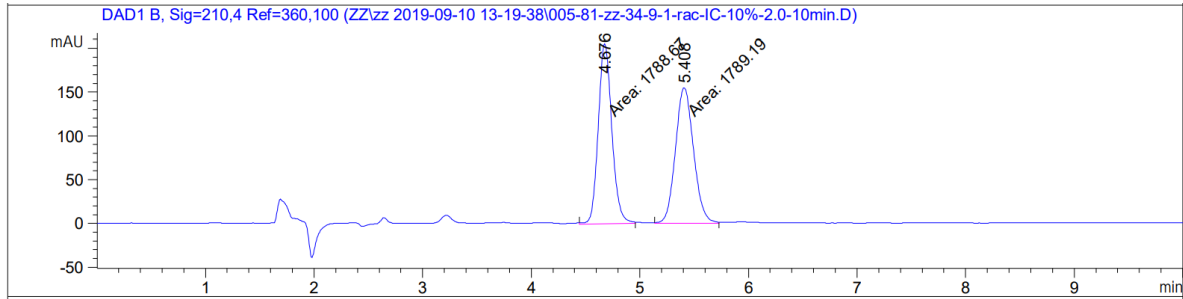

Signal 2: DAD1 B, Sig=210,4 Ref=360,100

| Peak # | RetTime [min] | Type | Width [min] | Area [mAU*s] | Height [mAU] | Area %  |
|--------|---------------|------|-------------|--------------|--------------|---------|
| 1      | 4.676         | MM   | 0.1450      | 1788.66638   | 205.55940    | 49.9927 |
| 2      | 5.408         | MM   | 0.1927      | 1789.18604   | 154.74773    | 50.0073 |

Totals : 3577.85242 360.30713

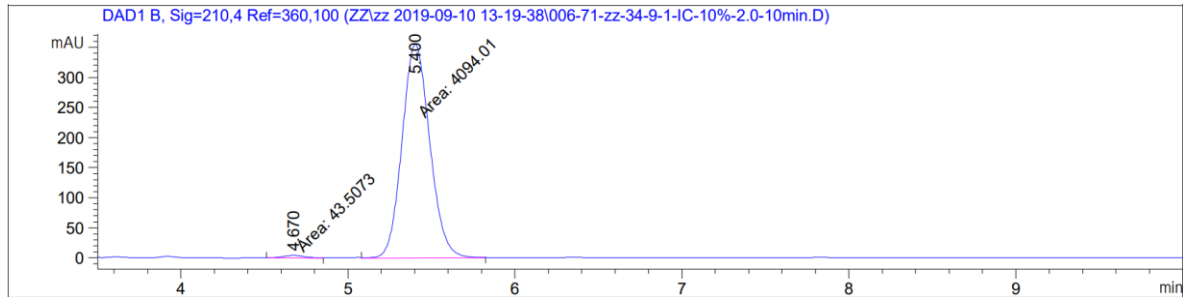

Signal 2: DAD1 B, Sig=210,4 Ref=360,100

| Peak # | RetTime [min] | Type | Width [min] | Area [mAU*s] | Height [mAU] | Area %  |
|--------|---------------|------|-------------|--------------|--------------|---------|
| 1      | 4.670         | MM   | 0.1632      | 43.50726     | 4.44184      | 1.0515  |
| 2      | 5.400         | MM   | 0.1921      | 4094.01270   | 355.20718    | 98.9485 |

Totals : 4137.51995 359.64902

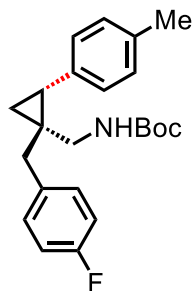

***tert*-Butyl (((1*S*,2*R*)-1-(4-fluorobenzyl)-2-(*p*-tolyl)cyclopropyl)methyl)carbamate (**3o'**)**

Following **General Procedure A** on 0.1 mmol scale. Purification by pTLC (hexane/EA) afforded the title compound (colorless oil, 22.5 mg, 61% yield, 96:4 er). The enantiomeric purity was determined by SFC analysis on a Chiralpak OJ column (5% IPA/CO<sub>2</sub>, 2.0 mL/min) with retention time 4.30 min (minor) and 5.01 min (major).

<sup>1</sup>H NMR (600 MHz, CDCl<sub>3</sub>) δ 7.31 – 7.19 (m, 2H), 7.06 (d, *J* = 7.7 Hz, 2H), 7.05 – 6.94 (m, 4H), 4.22 (br s, 1H), 2.88 (dd, *J* = 14.0, 6.5 Hz, 1H), 2.83 – 2.68 (m, 3H), 2.30 (s, 3H), 2.13 (dd, *J* = 8.6, 6.0 Hz, 1H), 1.40 (s, 9H), 1.03 (t, *J* = 6.0 Hz, 1H), 0.97 – 0.90 (m, 1H).

<sup>13</sup>C NMR (150 MHz, CDCl<sub>3</sub>) δ 161.21 (d, *J* = 244.1 Hz), 155.32, 135.35, 134.47, 134.45, 130.40 (d, *J* = 8.0 Hz), 128.64, 128.03, 114.67 (d, *J* = 21.2 Hz), 78.55, 42.02, 40.32, 33.88, 27.92, 27.07, 20.53, 14.10.

HRMS (ESI-TOF) Calcd for C<sub>18</sub>H<sub>21</sub>FN [M-Boc]: 270.1658; found: 270.1659.

The absolute stereochemistry was assigned by analogy to compound **3t'**.

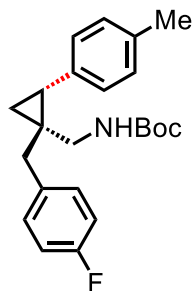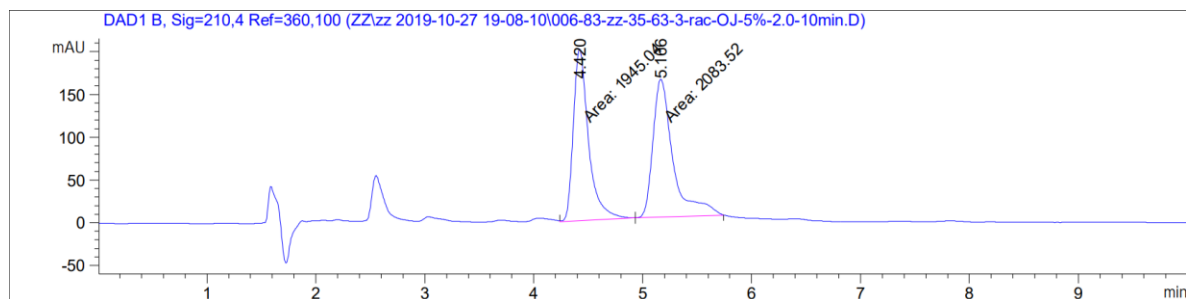

| Peak # | RetTime [min] | Type | Width [min] | Area [mAU*s] | Height [mAU] | Area %  |
|--------|---------------|------|-------------|--------------|--------------|---------|
| 1      | 4.420         | MM   | 0.1614      | 1945.04150   | 200.82118    | 48.2813 |
| 2      | 5.166         | MM   | 0.2156      | 2083.52246   | 161.07678    | 51.7187 |

Totals : 4028.56396 361.89796

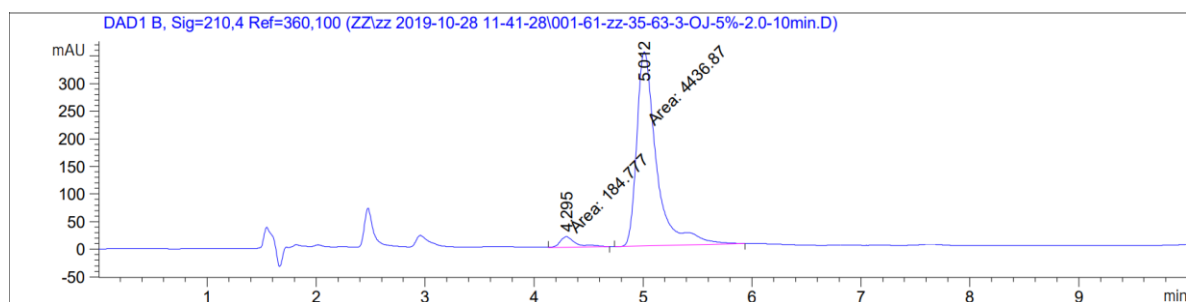

| Peak # | RetTime [min] | Type | Width [min] | Area [mAU*s] | Height [mAU] | Area %  |
|--------|---------------|------|-------------|--------------|--------------|---------|
| 1      | 4.295         | MM   | 0.1633      | 184.77670    | 18.85480     | 3.9981  |
| 2      | 5.012         | MM   | 0.2102      | 4436.86963   | 351.77042    | 96.0019 |

Totals : 4621.64633 370.62522

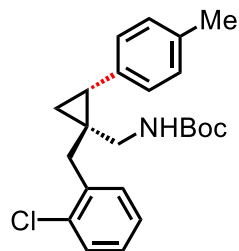

***tert*-Butyl (((1*S*,2*R*)-1-(2-chlorobenzyl)-2-(*p*-tolyl)cyclopropyl)methyl)carbamate (**3p'**)**

Following **General Procedure A** on 0.1 mmol scale. Purification by pTLC (hexane/EA) afforded the title compound (colorless oil, 28.0 mg, 73% yield, 97:3 er). The enantiomeric purity was determined by SFC analysis on a Chiralpak IC column (10% IPA/CO<sub>2</sub>, 2.0 mL/min) with retention time 6.57 min (minor) and 8.17 min (major).

<sup>1</sup>H NMR (600 MHz, CDCl<sub>3</sub>) δ 7.38 (d, *J* = 7.7 Hz, 1H), 7.35 (dd, *J* = 7.5, 1.5 Hz, 1H), 7.23 (td, *J* = 7.5, 1.2 Hz, 1H), 7.18 (td, *J* = 7.7, 1.5 Hz, 1H), 7.07 (s, 4H), 4.38 (br s, 1H), 3.21 (d, *J* = 13.5 Hz, 1H), 3.04 (dd, *J* = 14.3, 7.5 Hz, 1H), 2.91 (d, *J* = 13.5 Hz, 1H), 2.78 (dd, *J* = 14.3, 4.4 Hz, 1H), 2.30 (s, 3H), 2.04 – 1.98 (m, 1H), 1.40 (s, 9H), 1.06 – 1.01 (m, 1H), 0.87 – 0.80 (m, 1H).

<sup>13</sup>C NMR (150 MHz, CDCl<sub>3</sub>) δ 156.12, 136.66, 135.82, 135.16, 134.92, 131.81, 129.72, 129.19, 128.67, 128.01, 126.84, 79.11, 43.71, 37.45, 28.54, 27.27, 26.55, 21.14, 13.52.

HRMS (ESI-TOF) Calcd for C<sub>18</sub>H<sub>21</sub>ClN [M-Boc]: 286.1363; found: 286.1369.

The absolute stereochemistry was assigned by analogy to compound **3t'**.

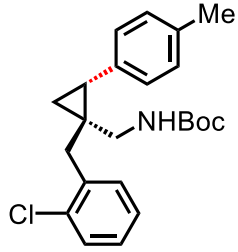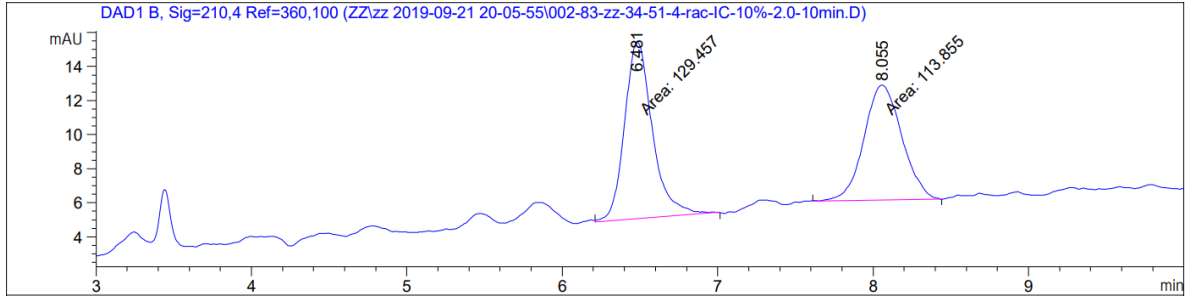

| Peak # | RetTime [min] | Type | Width [min] | Area [mAU*s] | Height [mAU] | Area %  |
|--------|---------------|------|-------------|--------------|--------------|---------|
| 1      | 6.481         | MM   | 0.2070      | 129.45726    | 10.42374     | 53.2062 |
| 2      | 8.055         | MM   | 0.2814      | 113.85495    | 6.74379      | 46.7938 |

Totals : 243.31221 17.16753

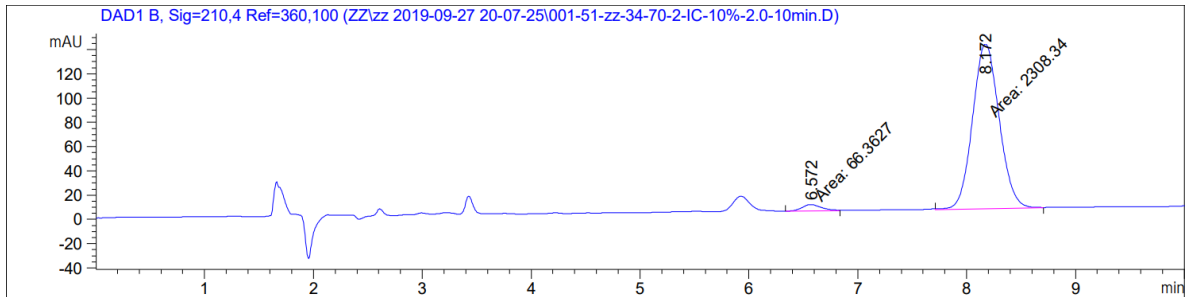

| Peak # | RetTime [min] | Type | Width [min] | Area [mAU*s] | Height [mAU] | Area %  |
|--------|---------------|------|-------------|--------------|--------------|---------|
| 1      | 6.572         | MM   | 0.2090      | 66.36269     | 5.29160      | 2.7946  |
| 2      | 8.172         | MM   | 0.2832      | 2308.33740   | 135.85718    | 97.2054 |

Totals : 2374.70009 141.14878

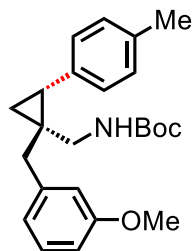

***tert*-Butyl (((1*S*,2*R*)-1-(3-methoxybenzyl)-2-(*p*-tolyl)cyclopropyl)methyl)carbamate (**3q'**)**

Following **General Procedure A** on 0.1 mmol scale. Purification by pTLC (hexane/EA) afforded the title compound (colorless oil, 25.0 mg, 66% yield, 96:4 er). The enantiomeric purity was determined by SFC analysis on a Chiralpak IC column (20% IPA/CO<sub>2</sub>, 2.0 mL/min) with retention time 4.15 min (minor) and 4.68 min (major).

<sup>1</sup>H NMR (600 MHz, CDCl<sub>3</sub>) δ 7.25 – 7.22 (m, 1H), 7.06 (d, *J* = 7.9 Hz, 2H), 7.03 (d, *J* = 7.9 Hz, 2H), 6.88 (d, *J* = 7.5 Hz, 1H), 6.85 (s, 1H), 6.79 (ddd, *J* = 8.2, 2.6, 0.9 Hz, 1H), 4.25 (br s, 1H), 3.82 (s, 3H), 2.90 (dd, *J* = 13.9, 6.2 Hz, 1H), 2.85 – 2.60 (m, 3H), 2.29 (s, 3H), 2.19 – 2.11 (m, 1H), 1.39 (s, 9H), 1.05 (t, *J* = 5.7 Hz, 1H), 0.98 – 0.91 (m, 1H).

<sup>13</sup>C NMR (150 MHz, CDCl<sub>3</sub>) δ 159.72, 155.93, 140.93, 135.83, 135.18, 129.42, 129.18, 128.68, 122.03, 115.31, 112.04, 79.05, 55.33, 42.79, 41.89, 28.51, 28.50, 27.82, 21.13, 14.73.

HRMS (ESI-TOF) Calcd for C<sub>19</sub>H<sub>24</sub>NO [M-Boc]: 282.1858; found: 282.1864.

The absolute stereochemistry was assigned by analogy to compound **3t'**.

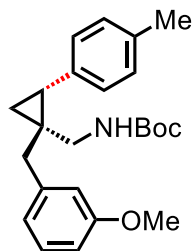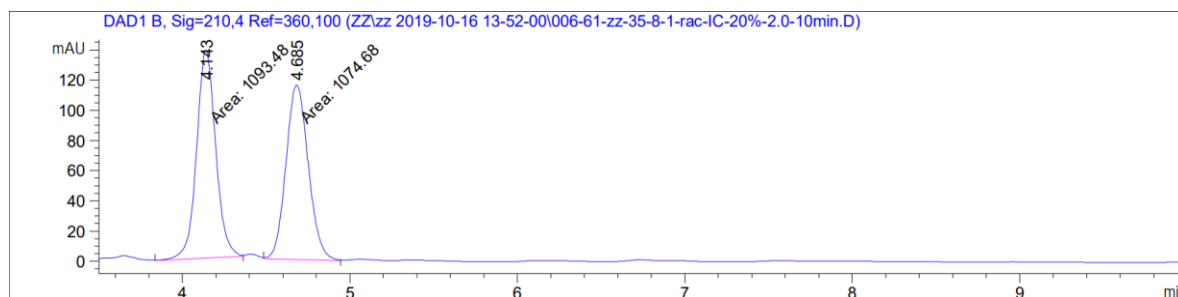

| Peak # | RetTime [min] | Type | Width [min] | Area [mAU*s] | Height [mAU] | Area %  |
|--------|---------------|------|-------------|--------------|--------------|---------|
| 1      | 4.143         | MM   | 0.1322      | 1093.48474   | 137.86510    | 50.4335 |
| 2      | 4.685         | MM   | 0.1547      | 1074.68481   | 115.81234    | 49.5665 |

Totals : 2168.16956 253.67744

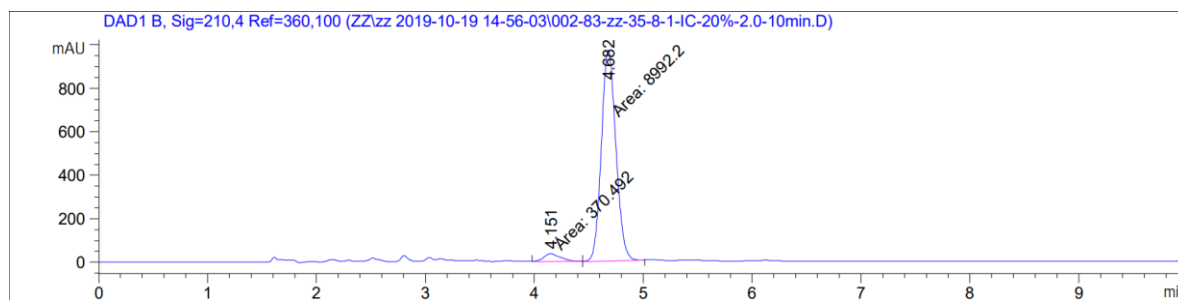

| Peak # | RetTime [min] | Type | Width [min] | Area [mAU*s] | Height [mAU] | Area %  |
|--------|---------------|------|-------------|--------------|--------------|---------|
| 1      | 4.151         | MM   | 0.1742      | 370.49158    | 35.45380     | 3.9571  |
| 2      | 4.682         | MM   | 0.1544      | 8992.20215   | 970.43518    | 96.0429 |

Totals : 9362.69373 1005.88898



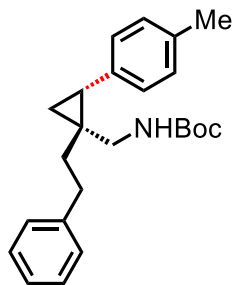

***tert*-Butyl (((1*R*,2*R*)-1-phenethyl-2-(*p*-tolyl)cyclopropyl)methyl)carbamate (**3r'**)**

Following **General Procedure A** on 0.1 mmol scale. Purification by pTLC (hexane/EA) afforded the title compound (colorless oil, 19.0 mg, 52% yield, 97.5:2.5 er). The enantiomeric purity was determined by SFC analysis on a Chiralpak IC column (15% IPA/CO<sub>2</sub>, 2.0 mL/min) with retention time 3.78 min (minor) and 4.54 min (major).

<sup>1</sup>H NMR (600 MHz, CDCl<sub>3</sub>) δ 7.33 – 7.26 (m, 2H), 7.23 (d, *J* = 7.0 Hz, 2H), 7.20 – 7.16 (m, 1H), 7.08 (d, *J* = 7.5 Hz, 2H), 7.02 (d, *J* = 7.5 Hz, 2H), 4.25 (br s, 1H), 3.05 (dd, *J* = 14.5, 6.9 Hz, 1H), 2.92 – 2.73 (m, 3H), 2.31 (s, 3H), 2.03 – 1.95 (m, 1H), 1.78 – 1.66 (m, 2H), 1.42 (s, 9H), 1.01 – 0.94 (m, 1H), 0.83 – 0.75 (m, 1H).

<sup>13</sup>C NMR (150 MHz, CDCl<sub>3</sub>) δ 156.10, 142.64, 135.83, 135.32, 129.19, 128.70, 128.63, 128.47, 125.83, 79.14, 42.10, 38.92, 33.22, 28.55, 27.75, 27.57, 21.14, 15.54.

HRMS (ESI-TOF) Calcd for C<sub>19</sub>H<sub>24</sub>N [M-Boc]: 266.1909; found: 266.1909.

The absolute stereochemistry was assigned by analogy to compound **3t'**.

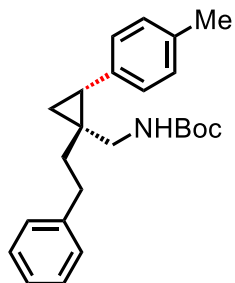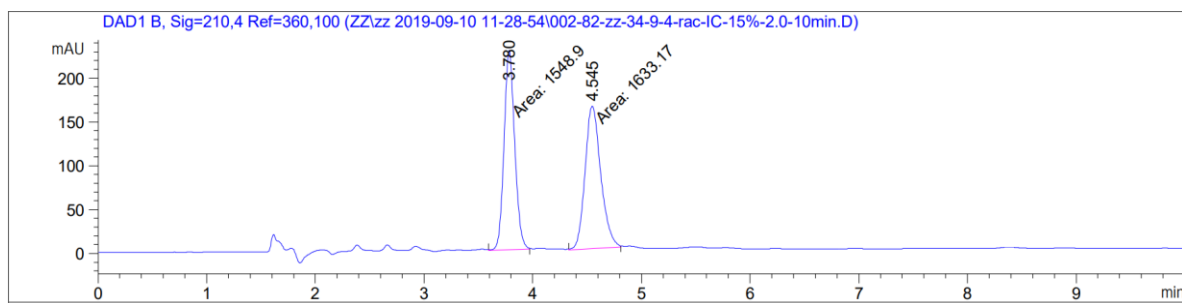

Signal 2: DAD1 B, Sig=210,4 Ref=360,100

| Peak # | RetTime [min] | Type | Width [min] | Area [mAU*s] | Height [mAU] | Area %  |
|--------|---------------|------|-------------|--------------|--------------|---------|
| 1      | 3.780         | MM   | 0.1131      | 1548.90222   | 228.16875    | 48.6759 |
| 2      | 4.545         | MM   | 0.1673      | 1633.17151   | 162.74539    | 51.3241 |

Totals : 3182.07373 390.91414

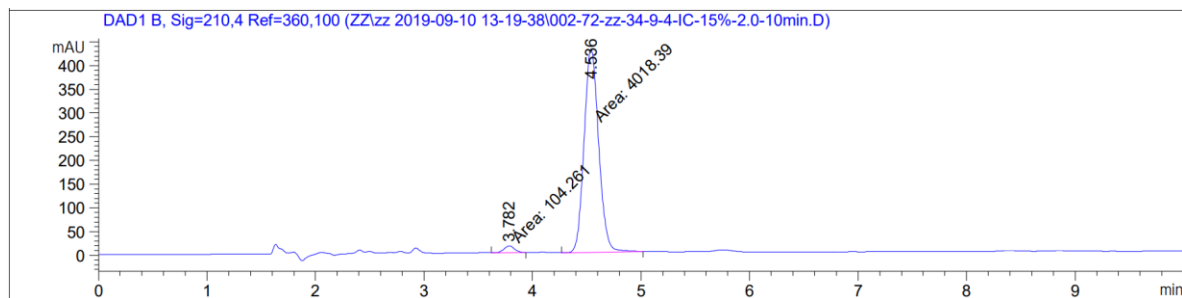

| Peak # | RetTime [min] | Type | Width [min] | Area [mAU*s] | Height [mAU] | Area %  |
|--------|---------------|------|-------------|--------------|--------------|---------|
| 1      | 3.782         | MM   | 0.1183      | 104.26067    | 14.68604     | 2.5290  |
| 2      | 4.536         | MM   | 0.1559      | 4018.38794   | 429.61642    | 97.4710 |

Totals : 4122.64861 444.30246

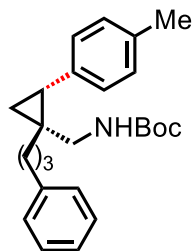

**tert-Butyl (((1R,2R)-1-(3-phenylpropyl)-2-(*p*-tolyl)cyclopropyl)methyl)carbamate (3s')**

Following **General Procedure A** on 0.1 mmol scale. Purification by pTLC (hexane/EA) afforded the title compound (colorless oil, 28.0 mg, 74% yield, 96:4 er). The enantiomeric purity was determined by SFC analysis on a Chiralpak IC column (15% IPA/CO<sub>2</sub>, 2.0 mL/min) with retention time 4.05 min (major) and 4.61 min (minor).

<sup>1</sup>H NMR (600 MHz, CDCl<sub>3</sub>) δ 7.28 (t, *J* = 7.6 Hz, 2H), 7.20 (d, *J* = 7.6 Hz, 2H), 7.19 – 7.14 (m, 1H), 7.06 (s, 4H), 4.19 (br s, 1H), 2.92 (dd, *J* = 14.3, 6.5 Hz, 1H), 2.80 (dd, *J* = 14.3, 4.6 Hz, 1H), 2.64 (t, *J* = 7.6 Hz, 2H), 2.30 (s, 3H), 1.94 (dd, *J* = 8.3, 6.3 Hz, 1H), 1.91 – 1.76 (m, 2H), 1.54 – 1.47 (m, 1H), 1.46 – 1.40 (m, 1H), 1.39 (s, 9H), 0.95 (t, *J* = 5.6 Hz, 1H), 0.75 (dd, *J* = 8.3, 5.1 Hz, 1H).

<sup>13</sup>C NMR (150 MHz, CDCl<sub>3</sub>) δ 156.00, 142.54, 135.74, 135.44, 129.16, 128.68, 128.56, 128.44, 125.84, 79.03, 42.38, 36.32, 36.14, 28.53, 28.26, 27.48, 21.13, 15.55, 13.30.

HRMS (ESI-TOF) Calcd for C<sub>20</sub>H<sub>26</sub>N [M-Boc]: 280.2065; found: 280.2071.

The absolute stereochemistry was assigned by analogy to compound **3t'**.

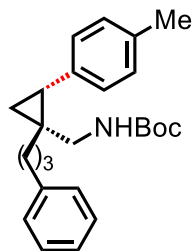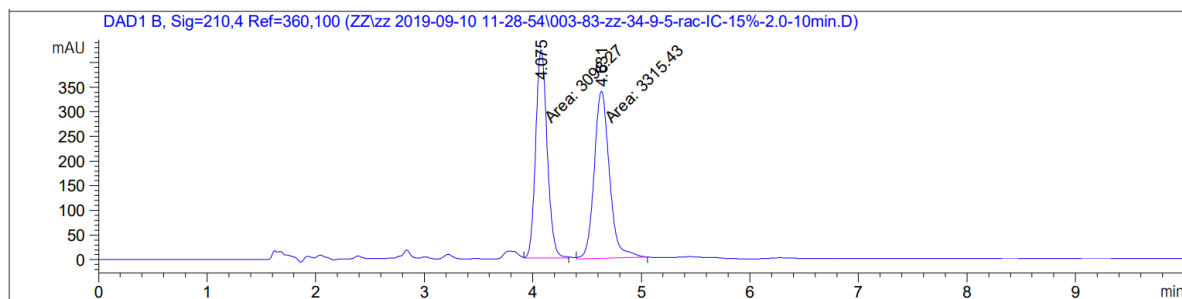

| Peak # | RetTime [min] | Type | Width [min] | Area [mAU*s] | Height [mAU] | Area %  |
|--------|---------------|------|-------------|--------------|--------------|---------|
| 1      | 4.075         | MM   | 0.1221      | 3098.27393   | 422.95941    | 48.3071 |
| 2      | 4.631         | MM   | 0.1631      | 3315.43188   | 338.89459    | 51.6929 |

Totals : 6413.70581 761.85400

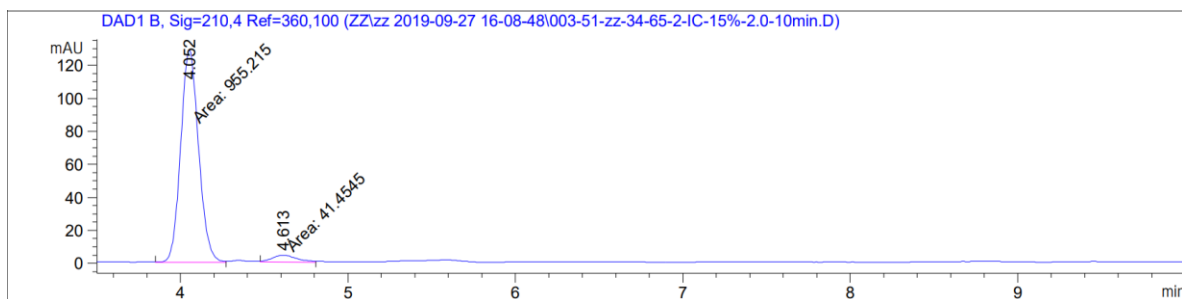

| Peak # | RetTime [min] | Type | Width [min] | Area [mAU*s] | Height [mAU] | Area %  |
|--------|---------------|------|-------------|--------------|--------------|---------|
| 1      | 4.052         | MM   | 0.1236      | 955.21539    | 128.82640    | 95.8407 |
| 2      | 4.613         | MM   | 0.1698      | 41.45452     | 4.06780      | 4.1593  |

Totals : 996.66991 132.89420

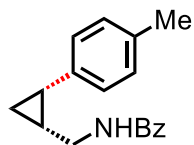

***N*-(((1*R*,2*S*)-2-(*p*-tolyl)cyclopropyl)methyl)benzamide (3*t'*)**

Following **General Procedure A** on 0.1 mmol scale. Purification by pTLC (hexane/EA) afforded the title compound (colorless oil, 11.0 mg, 42% yield, 96.5:3.5 er). The enantiomeric purity was determined by SFC analysis on a Chiralpak AD column (30% IPA/CO<sub>2</sub>, 2.0 mL/min) with retention time 3.30 min (major) and 3.97 min (minor).

The NMR data matches the reported data<sup>1</sup>.

The absolute stereochemistry was assigned by the reported compounds<sup>1,7</sup>.

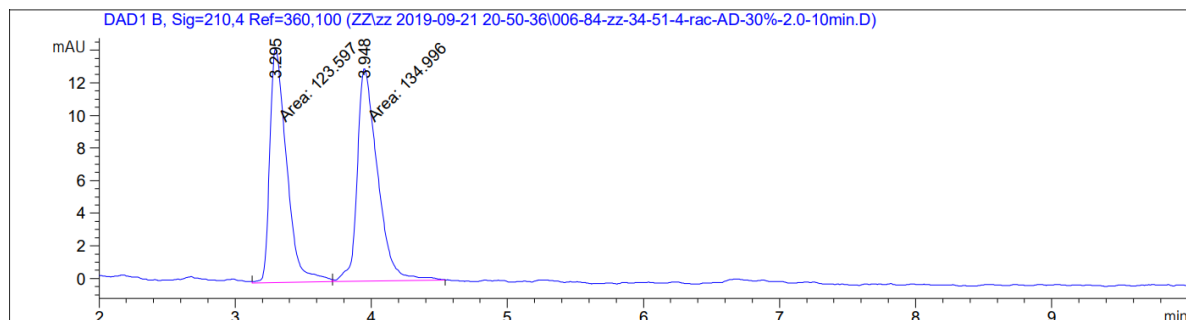

| Peak # | RetTime [min] | Type | Width [min] | Area [mAU*s] | Height [mAU] | Area %  |
|--------|---------------|------|-------------|--------------|--------------|---------|
| 1      | 3.295         | MM   | 0.1437      | 123.59656    | 14.33376     | 47.7958 |
| 2      | 3.948         | MM   | 0.1724      | 134.99648    | 13.05299     | 52.2042 |

Totals : 258.59303 27.38675

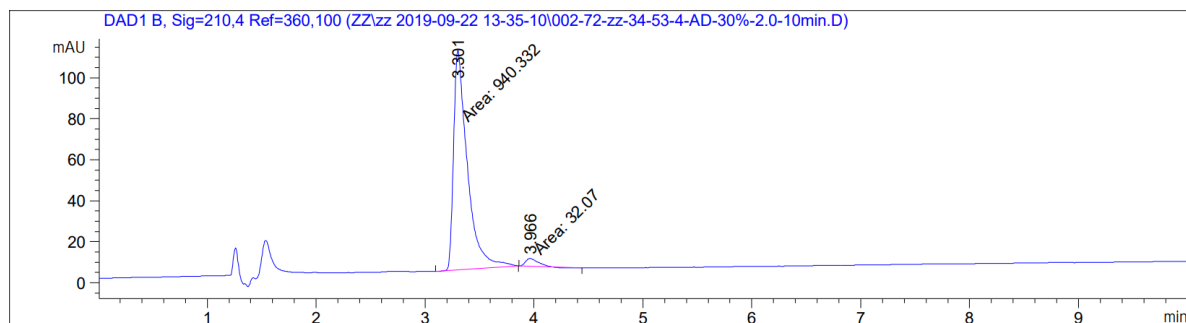

| Peak # | RetTime [min] | Type | Width [min] | Area [mAU*s] | Height [mAU] | Area %  |
|--------|---------------|------|-------------|--------------|--------------|---------|
| 1      | 3.301         | MM   | 0.1462      | 940.33191    | 107.20582    | 96.7020 |
| 2      | 3.966         | MM   | 0.1384      | 32.07000     | 3.86315      | 3.2980  |

Totals : 972.40191 111.06897

## Aryl and heteroaryl iodide scope for $\gamma$ -C(sp<sup>3</sup>)-H arylation

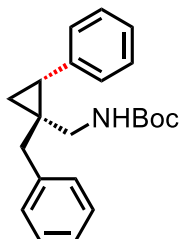

### ***tert*-Butyl (((1*S*,2*R*)-1-benzyl-2-phenylcyclopropyl)methyl)carbamate (**4b'**)**

Following **General Procedure A** on 0.1 mmol scale. Purification by pTLC (hexane/EA) afforded the title compound (colorless oil, 24.0 mg, 71% yield, 97.5:2.5 er). The enantiomeric purity was determined by SFC analysis on a Chiralpak IC column (10% IPA/CO<sub>2</sub>, 2.0 mL/min) with retention time 5.07 min (minor) and 5.49 min (major).

<sup>1</sup>H NMR (600 MHz, CDCl<sub>3</sub>)  $\delta$  7.35 – 7.32 (m, 2H), 7.29 (d,  $J$  = 7.4 Hz, 2H), 7.28 – 7.22 (m, 3H), 7.19 – 7.11 (m, 3H), 4.24 (br s, 1H), 2.87 (d,  $J$  = 16.3 Hz, 2H), 2.83 – 2.77 (m, 1H), 2.74 (d,  $J$  = 14.0 Hz, 1H), 2.20 (dd,  $J$  = 8.5, 6.1 Hz, 1H), 1.40 (s, 9H), 1.08 (t,  $J$  = 5.7 Hz, 1H), 0.99 – 0.93 (m, 1H).

<sup>13</sup>C NMR (150 MHz, CDCl<sub>3</sub>)  $\delta$  155.94, 139.26, 138.35, 129.68, 128.81, 128.53, 128.47, 126.57, 126.33, 79.11, 42.85, 41.77, 28.74, 28.53, 28.01, 14.75.

HRMS (ESI-TOF) Calcd for C<sub>17</sub>H<sub>20</sub>N [M-Boc]: 238.1596; found: 238.1594.

The absolute stereochemistry was assigned by analogy to compound **3t'**.

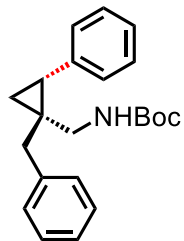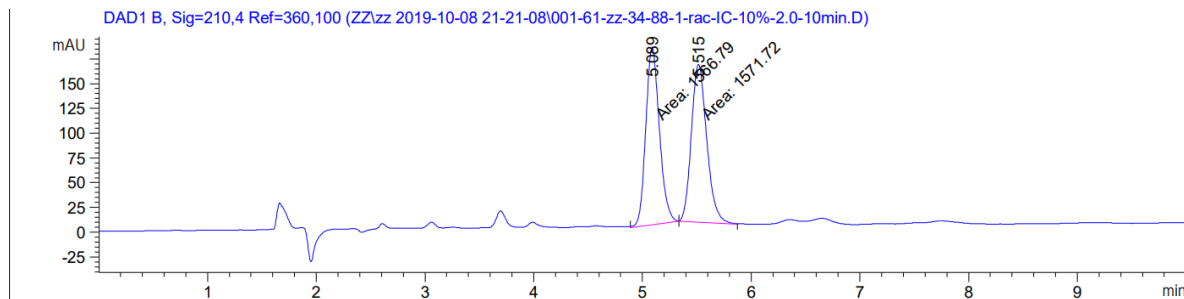

| Peak # | RetTime [min] | Type | Width [min] | Area [mAU*s] | Height [mAU] | Area %  |
|--------|---------------|------|-------------|--------------|--------------|---------|
| 1      | 5.089         | MM   | 0.1452      | 1566.79358   | 179.87347    | 49.9215 |
| 2      | 5.515         | MM   | 0.1643      | 1571.71985   | 159.44844    | 50.0785 |

Totals : 3138.51343 339.32191

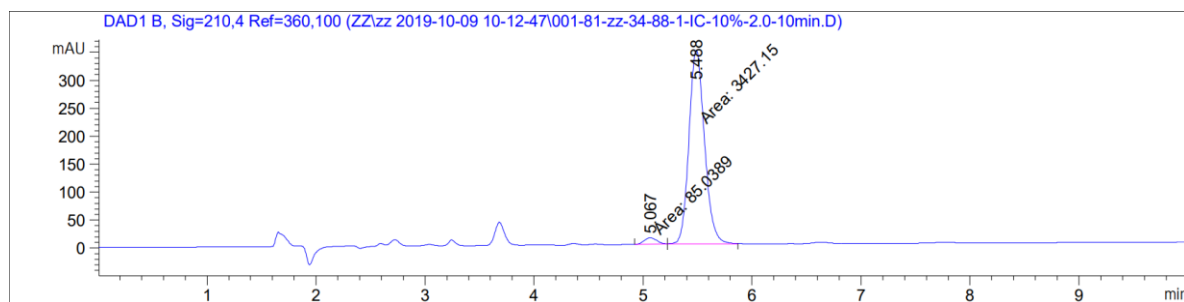

| Peak # | RetTime [min] | Type | Width [min] | Area [mAU*s] | Height [mAU] | Area %  |
|--------|---------------|------|-------------|--------------|--------------|---------|
| 1      | 5.067         | MM   | 0.1259      | 85.03890     | 11.25927     | 2.4213  |
| 2      | 5.488         | MM   | 0.1649      | 3427.14990   | 346.43365    | 97.5787 |

Totals : 3512.18880 357.69293



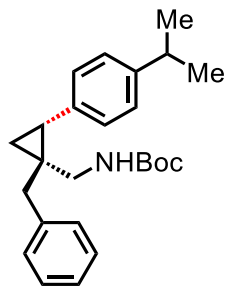

***tert*-Butyl (((1*S*,2*R*)-1-benzyl-2-(4-isopropylphenyl)cyclopropyl)methyl)carbamate (4c')**

Following **General Procedure A** on 0.1 mmol scale. Purification by pTLC (hexane/EA) afforded the title compound (colorless oil, 23.0 mg, 61% yield, 96:4 er). The enantiomeric purity was determined by SFC analysis on a Chiralpak IC column (10% IPA/CO<sub>2</sub>, 2.0 mL/min) with retention time 5.04 min (minor) and 5.42 min (major).

<sup>1</sup>H NMR (600 MHz, CDCl<sub>3</sub>) δ 7.39 – 7.34 (m, 2H), 7.34 – 7.29 (m, 2H), 7.28 – 7.25 (m, 1H), 7.13 (d, *J* = 7.8 Hz, 2H), 7.08 (d, *J* = 7.8 Hz, 2H), 4.29 (br s, 1H), 2.95 – 2.79 (m, 4H), 2.73 (d, *J* = 14.4 Hz, 1H), 2.24 – 2.15 (m, 1H), 1.43 (s, 9H), 1.24 (d, *J* = 6.9 Hz, 6H), 1.08 (t, *J* = 5.7 Hz, 1H), 1.01 – 0.93 (m, 1H).

<sup>13</sup>C NMR (150 MHz, CDCl<sub>3</sub>) δ 155.98, 146.88, 139.39, 135.56, 129.64, 128.75, 128.51, 126.53, 126.51, 79.05, 42.87, 41.86, 33.81, 28.54, 27.77, 24.14, 14.86 (1 carbon signal was not assigned due to overlaps).

HRMS (ESI-TOF) Calcd for C<sub>20</sub>H<sub>26</sub>N [M-Boc]: 280.2065; found: 280.2065.

The absolute stereochemistry was assigned by analogy to compound **3t'**.

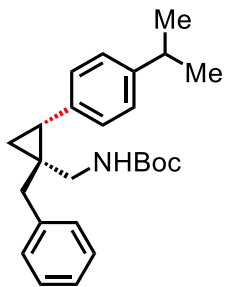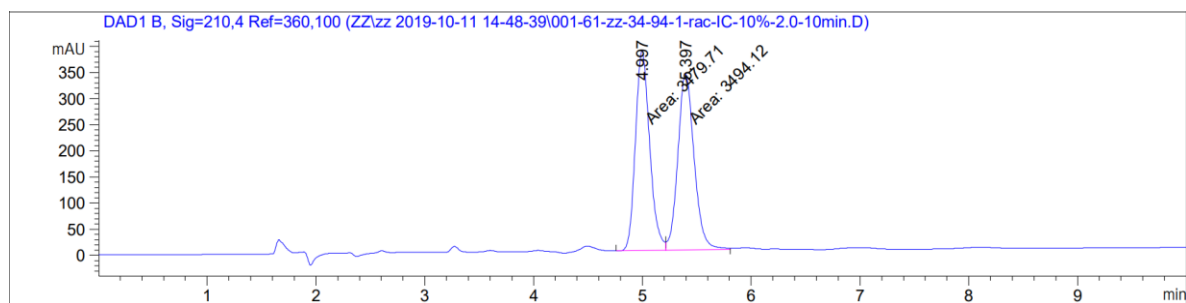

| Peak # | RetTime [min] | Type | Width [min] | Area [mAU*s] | Height [mAU] | Area %  |
|--------|---------------|------|-------------|--------------|--------------|---------|
| 1      | 4.997         | MF   | 0.1516      | 3479.70654   | 382.59589    | 49.8967 |
| 2      | 5.397         | FM   | 0.1728      | 3494.11865   | 336.95877    | 50.1033 |

Totals : 6973.82520 719.55466

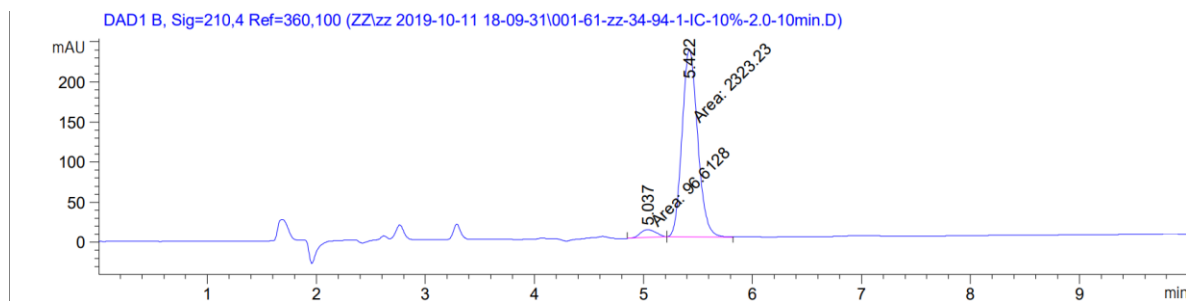

| Peak # | RetTime [min] | Type | Width [min] | Area [mAU*s] | Height [mAU] | Area %  |
|--------|---------------|------|-------------|--------------|--------------|---------|
| 1      | 5.037         | MM   | 0.1623      | 96.61280     | 9.91823      | 3.9925  |
| 2      | 5.422         | MM   | 0.1653      | 2323.22974   | 234.27878    | 96.0075 |

Totals : 2419.84254 244.19701

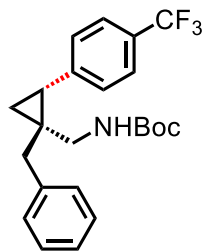

***tert*-Butyl (((1*S*,2*R*)-1-benzyl-2-(4-(trifluoromethyl)phenyl)cyclopropyl)methyl)carbamate (4d')**

Following **General Procedure A** on 0.1 mmol scale. Purification by pTLC (hexane/EA) afforded the title compound (colorless oil, 29.0 mg, 72% yield, 96:4 er). The enantiomeric purity was determined by SFC analysis on a Chiralpak IC column (5% IPA/CO<sub>2</sub>, 2.0 mL/min) with retention time 5.01 min (minor) and 5.91 min (major).

<sup>1</sup>H NMR (600 MHz, CDCl<sub>3</sub>) δ 7.50 (d, *J* = 8.0 Hz, 2H), 7.35 (t, *J* = 7.5 Hz, 2H), 7.30 – 7.26 (m, 3H), 7.23 (d, *J* = 8.0 Hz, 2H), 4.27 (br s, 1H), 2.94 (d, *J* = 14.0 Hz, 1H), 2.87 – 2.74 (m, 2H), 2.70 (d, *J* = 14.0 Hz, 1H), 2.28 – 2.18 (m, 1H), 1.40 (s, 9H), 1.17 (t, *J* = 5.3 Hz, 1H), 1.08 – 0.99 (m, 1H).

<sup>13</sup>C NMR (150 MHz, CDCl<sub>3</sub>) δ 155.88, 142.69, 138.89, 129.59, 129.10, 128.66, 126.78, 125.35 (q, *J* = 4.0 Hz), 124.37 (q, *J* = 271.9 Hz), 79.34, 42.72, 41.76, 29.34, 28.49, 27.83, 15.32.

HRMS (ESI-TOF) Calcd for C<sub>18</sub>H<sub>19</sub>F<sub>3</sub>N [M-Boc]: 306.1470; found: 306.1476.

The absolute stereochemistry was assigned by analogy to compound **3t'**.

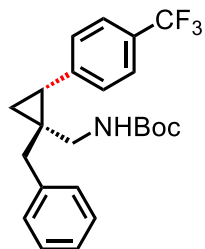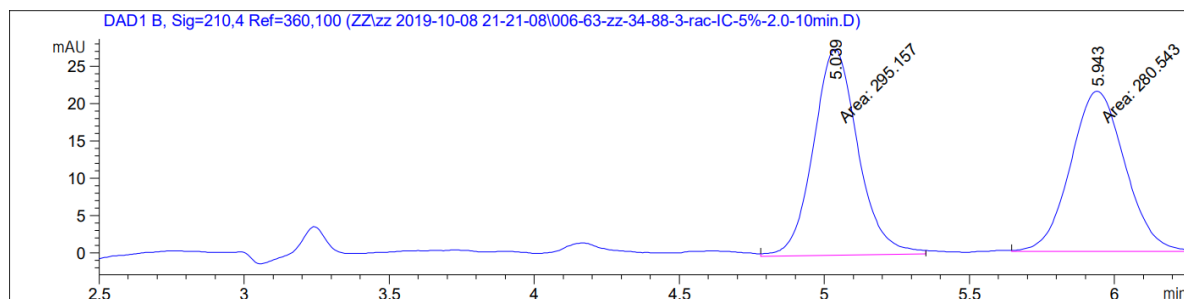

| Peak # | RetTime [min] | Type | Width [min] | Area [mAU*s] | Height [mAU] | Area %  |
|--------|---------------|------|-------------|--------------|--------------|---------|
| 1      | 5.039         | MM   | 0.1782      | 295.15726    | 27.60513     | 51.2693 |
| 2      | 5.943         | MM   | 0.2174      | 280.54254    | 21.50617     | 48.7307 |

Totals : 575.69980 49.11129

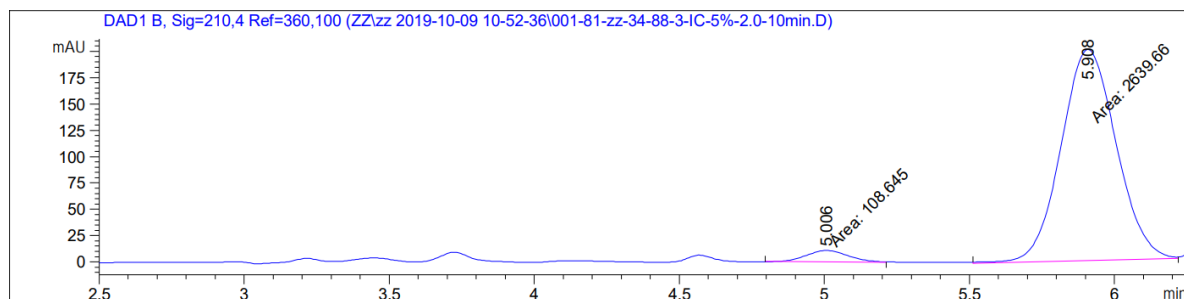

| Peak # | RetTime [min] | Type | Width [min] | Area [mAU*s] | Height [mAU] | Area %  |
|--------|---------------|------|-------------|--------------|--------------|---------|
| 1      | 5.006         | MM   | 0.1675      | 108.64465    | 10.81055     | 3.9532  |
| 2      | 5.908         | MM   | 0.2195      | 2639.65869   | 200.41650    | 96.0468 |

Totals : 2748.30334 211.22705

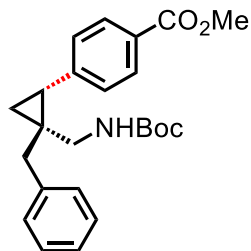

**Methyl 4-((1*R*,2*S*)-2-benzyl-2-(((tert-butoxycarbonyl)amino)methyl)cyclopropyl)benzoate (4e')**

Following **General Procedure A** on 0.1 mmol scale. Purification by pTLC (hexane/EA) afforded the title compound (colorless oil, 18.0 mg, 46% yield, 96:4 er). The enantiomeric purity was determined by SFC analysis on a Chiralpak IC column (20% IPA/CO<sub>2</sub>, 2.0 mL/min) with retention time 5.68 min (minor) and 6.42 min (major).

<sup>1</sup>H NMR (600 MHz, CDCl<sub>3</sub>) δ 7.93 (d, *J* = 8.2 Hz, 2H), 7.38 – 7.32 (m, 2H), 7.31 – 7.26 (m, 3H), 7.20 (d, *J* = 8.1 Hz, 2H), 4.22 (br s, 1H), 3.89 (s, 3H), 2.95 – 2.83 (m, 2H), 2.82 – 2.73 (m, 2H), 2.25 – 2.18 (m, 1H), 1.39 (s, 9H), 1.17 (t, *J* = 5.8 Hz, 1H), 1.07 – 0.99 (m, 1H).

<sup>13</sup>C NMR (150 MHz, CDCl<sub>3</sub>) δ 167.09, 155.86, 144.11, 138.89, 129.75, 129.65, 128.73, 128.59, 128.21, 126.71, 79.27, 52.15, 42.69, 41.67, 29.65, 28.49, 28.05, 15.21.

HRMS (ESI-TOF) Calcd for C<sub>19</sub>H<sub>22</sub>NO<sub>2</sub> [M-Boc]: 296.1651; found: 296.1651.

The absolute stereochemistry was assigned by analogy to compound **3t'**.

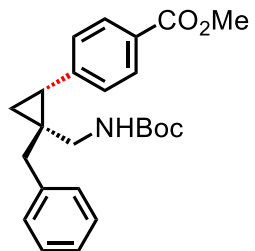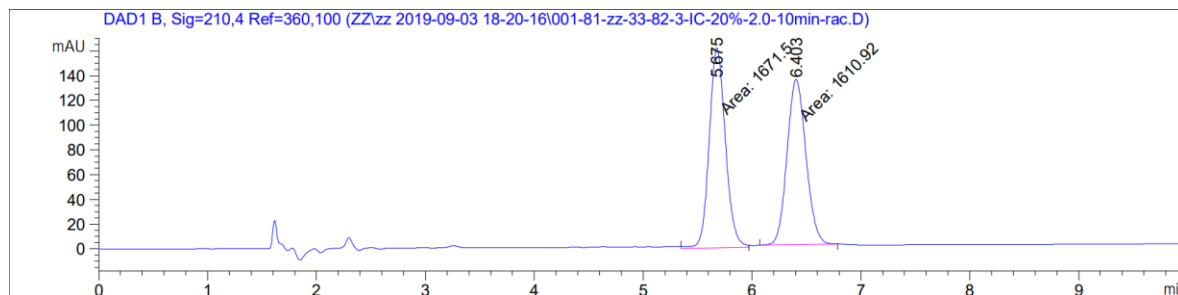

| Peak # | RetTime [min] | Type | Width [min] | Area [mAU*s] | Height [mAU] | Area %  |
|--------|---------------|------|-------------|--------------|--------------|---------|
| 1      | 5.675         | MM   | 0.1722      | 1671.50391   | 161.78822    | 50.9228 |
| 2      | 6.403         | MM   | 0.2009      | 1610.92078   | 133.61922    | 49.0772 |

Totals : 3282.42468 295.40744

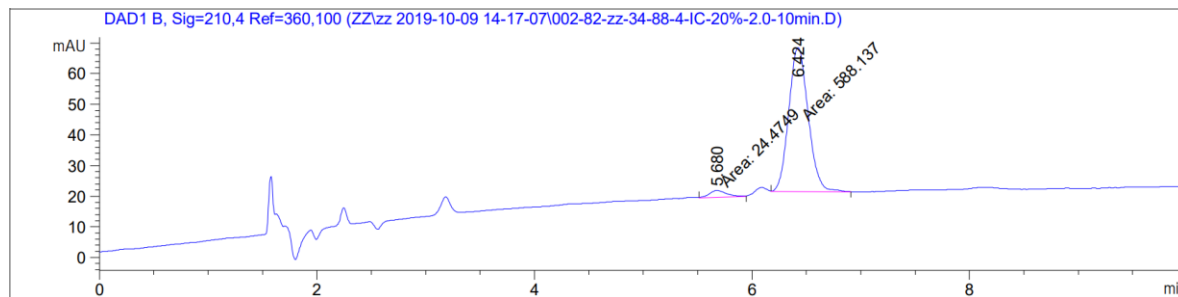

| Peak # | RetTime [min] | Type | Width [min] | Area [mAU*s] | Height [mAU] | Area %  |
|--------|---------------|------|-------------|--------------|--------------|---------|
| 1      | 5.680         | MM   | 0.1848      | 24.47491     | 2.20788      | 3.9952  |
| 2      | 6.424         | MM   | 0.2081      | 588.13702    | 47.11264     | 96.0048 |

Totals : 612.61194 49.32052

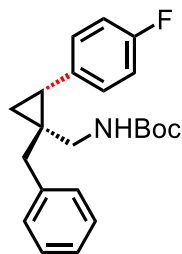

***tert*-Butyl (((1*S*,2*R*)-1-benzyl-2-(4-fluorophenyl)cyclopropyl)methyl)carbamate (**4f'**)**

Following **General Procedure A** on 0.1 mmol scale. Purification by pTLC (toluene/EA) afforded the title compound (colorless oil, 18.0 mg, 51% yield, 97.5:2.5 er). The enantiomeric purity was determined by SFC analysis on a Chiralpak IC column (10% IPA/CO<sub>2</sub>, 2.0 mL/min) with retention time 4.36 min (minor) and 4.79 min (major).

<sup>1</sup>H NMR (600 MHz, CDCl<sub>3</sub>) δ 7.40 – 7.34 (m, 2H), 7.32 – 7.27 (m, 3H), 7.10 (dd, *J* = 8.0, 5.6 Hz, 2H), 6.96 (t, *J* = 8.5 Hz, 2H), 4.28 (br s, 1H), 2.92 (d, *J* = 14.2 Hz, 1H), 2.88 – 2.77 (m, 2H), 2.71 (d, *J* = 14.2 Hz, 1H), 2.24 – 2.15 (m, 1H), 1.43 (s, 9H), 1.07 (t, *J* = 5.7 Hz, 1H), 1.03 – 0.95 (m, 1H).

<sup>13</sup>C NMR (150 MHz, CDCl<sub>3</sub>) δ 161.58 (d, *J* = 244.9 Hz), 155.91, 139.18, 134.00, 130.27 (d, *J* = 7.8 Hz), 129.61, 128.59, 126.65, 115.28 (d, *J* = 21.5 Hz), 79.22, 42.86, 41.72, 28.58, 28.52, 27.25, 15.14.

HRMS (ESI-TOF) Calcd for C<sub>17</sub>H<sub>19</sub>FN [M-Boc]: 256.1502; found: 256.1503.

The absolute stereochemistry was assigned by analogy to compound **3t'**.

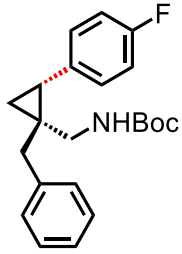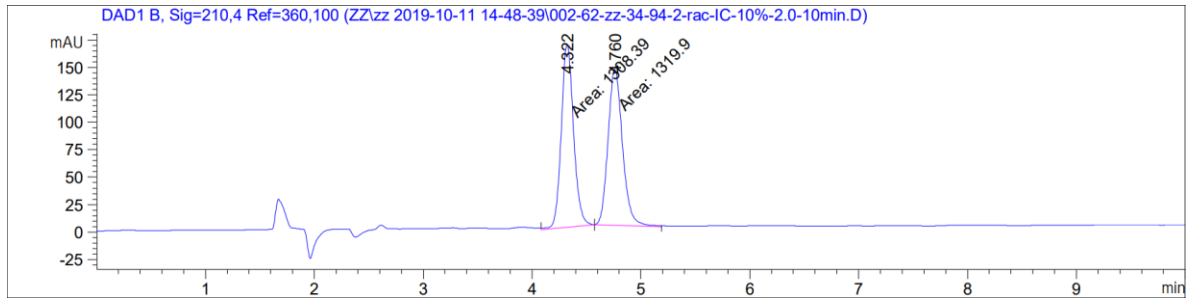

| Peak # | RetTime [min] | Type | Width [min] | Area [mAU*s] | Height [mAU] | Area %  |
|--------|---------------|------|-------------|--------------|--------------|---------|
| 1      | 4.322         | MM   | 0.1304      | 1308.38843   | 167.28415    | 49.7810 |
| 2      | 4.760         | MM   | 0.1543      | 1319.90027   | 142.57883    | 50.2190 |

Totals : 2628.28870 309.86298

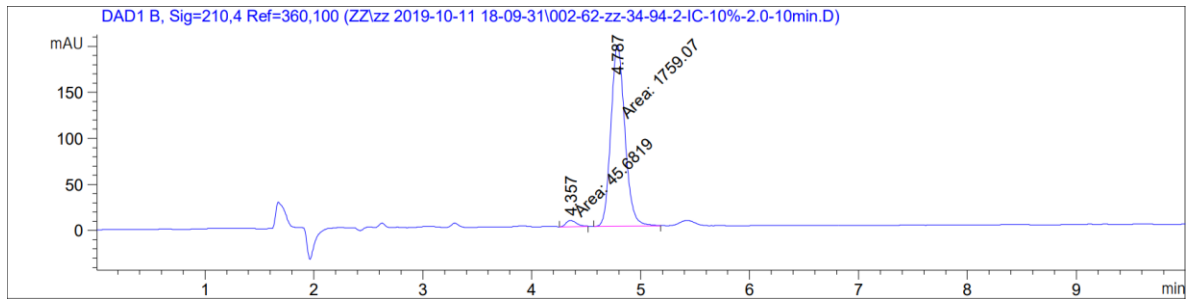

| Peak # | RetTime [min] | Type | Width [min] | Area [mAU*s] | Height [mAU] | Area %  |
|--------|---------------|------|-------------|--------------|--------------|---------|
| 1      | 4.357         | MM   | 0.1130      | 45.68194     | 6.73976      | 2.5312  |
| 2      | 4.787         | MM   | 0.1490      | 1759.07227   | 196.77205    | 97.4688 |

Totals : 1804.75421 203.51181



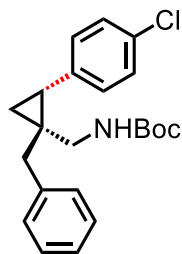

***tert*-Butyl (((1*S*,2*R*)-1-benzyl-2-(4-chlorophenyl)cyclopropyl)methyl)carbamate (**4g'**)**

Following **General Procedure A** on 0.1 mmol scale. Purification by pTLC (toluene/EA) afforded the title compound (colorless oil, 23.0 mg, 62% yield, 96:4 er). The enantiomeric purity was determined by SFC analysis on a Chiralpak IC column (10% IPA/CO<sub>2</sub>, 2.0 mL/min) with retention time 6.11 min (minor) and 6.76 min (major).

<sup>1</sup>H NMR (600 MHz, CDCl<sub>3</sub>) δ 7.33 (t, *J* = 7.6 Hz, 2H), 7.30 – 7.23 (m, 3H), 7.21 (d, *J* = 8.2 Hz, 2H), 7.05 (d, *J* = 8.2 Hz, 2H), 4.25 (br s, 1H), 2.89 (d, *J* = 14.1 Hz, 1H), 2.85 – 2.76 (m, 2H), 2.70 (d, *J* = 14.1 Hz, 1H), 2.20 – 2.10 (m, 1H), 1.40 (s, 9H), 1.06 (t, *J* = 5.7 Hz, 1H), 1.03 – 0.93 (m, 1H).

<sup>13</sup>C NMR (150 MHz, CDCl<sub>3</sub>) δ 155.90, 139.05, 136.93, 132.09, 130.15, 129.61, 128.59, 128.57, 126.68, 79.26, 42.79, 41.69, 28.90, 28.52, 27.39, 15.08.

HRMS (ESI-TOF) Calcd for C<sub>17</sub>H<sub>19</sub>ClN [M-Boc]: 272.1206; found: 272.1210.

The absolute stereochemistry was assigned by analogy to compound **3t'**.

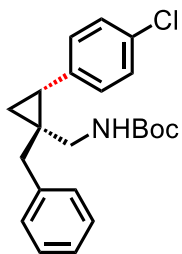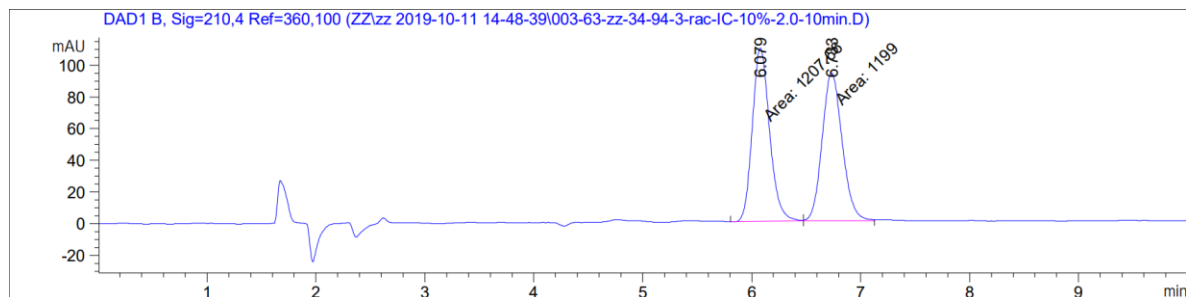

| Peak # | RetTime [min] | Type | Width [min] | Area [mAU*s] | Height [mAU] | Area %  |
|--------|---------------|------|-------------|--------------|--------------|---------|
| 1      | 6.079         | MM   | 0.1837      | 1207.66309   | 109.54874    | 50.1799 |
| 2      | 6.733         | MM   | 0.2137      | 1199.00232   | 93.50866     | 49.8201 |

Totals : 2406.66541 203.05740

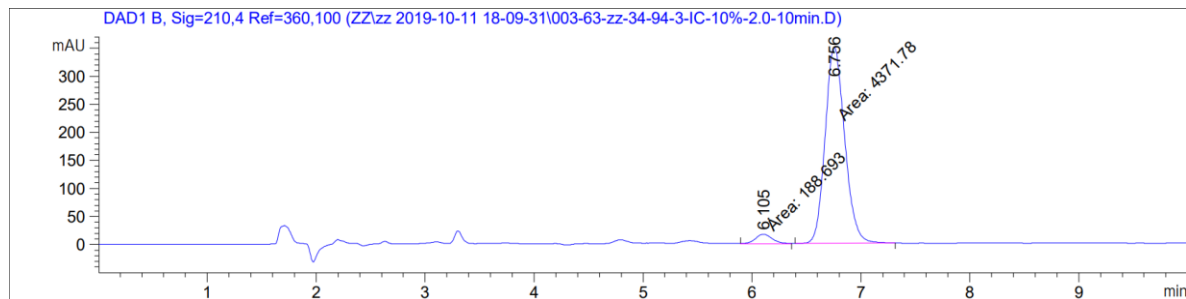

| Peak # | RetTime [min] | Type | Width [min] | Area [mAU*s] | Height [mAU] | Area %  |
|--------|---------------|------|-------------|--------------|--------------|---------|
| 1      | 6.105         | MM   | 0.1845      | 188.69276    | 17.04367     | 4.1376  |
| 2      | 6.756         | MM   | 0.2082      | 4371.78076   | 350.02069    | 95.8624 |

Totals : 4560.47353 367.06436

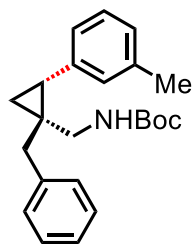

***tert*-Butyl (((1*S*,2*R*)-1-benzyl-2-(*m*-tolyl)cyclopropyl)methyl)carbamate (**4h'**)**

Following **General Procedure A** on 0.1 mmol scale. Purification by pTLC (hexane/EA) afforded the title compound (colorless oil, 24.0 mg, 68% yield, 97:3 er). The enantiomeric purity was determined by SFC analysis on a Chiralpak IC column (10% IPA/CO<sub>2</sub>, 2.0 mL/min) with retention time 5.05 min (minor) and 5.47 min (major).

<sup>1</sup>H NMR (600 MHz, CDCl<sub>3</sub>) δ 7.38 – 7.22 (m, 5H), 7.13 (t, *J* = 7.3 Hz, 1H), 7.03 – 6.88 (m, 3H), 4.24 (br s, 1H), 2.96 – 2.70 (m, 4H), 2.30 (s, 3H), 2.17 – 2.10 (m, 1H), 1.40 (s, 9H), 1.05 (t, *J* = 5.3 Hz, 1H), 0.97 – 0.90 (m, 1H).

<sup>13</sup>C NMR (150 MHz, CDCl<sub>3</sub>) δ 155.94, 139.28, 138.26, 137.99, 129.71, 129.57, 128.49, 128.36, 127.12, 126.53, 125.85, 79.06, 42.93, 41.72, 28.52, 27.87, 21.57, 14.64, 12.98.

HRMS (ESI-TOF) Calcd for C<sub>18</sub>H<sub>22</sub>N [M-Boc]: 252.1752; found: 252.1751.

The absolute stereochemistry was assigned by analogy to compound **3t'**.

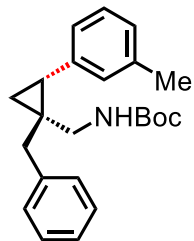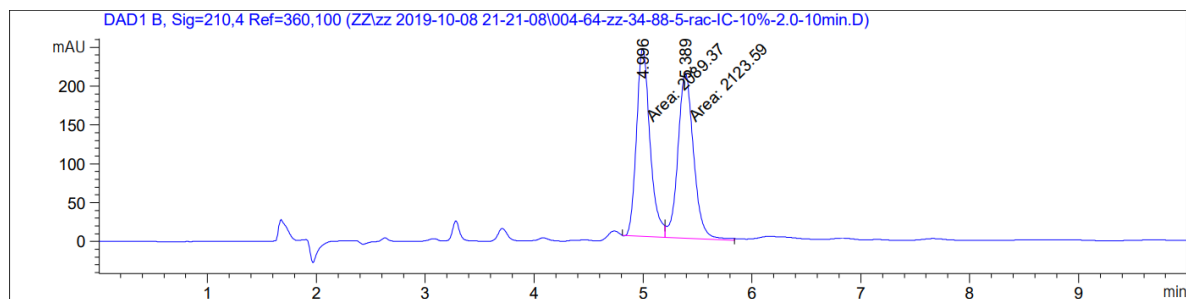

| Peak # | RetTime [min] | Type | Width [min] | Area [mAU*s] | Height [mAU] | Area %  |
|--------|---------------|------|-------------|--------------|--------------|---------|
| 1      | 4.996         | MF   | 0.1444      | 2089.36987   | 241.22739    | 49.5939 |
| 2      | 5.389         | FM   | 0.1670      | 2123.58545   | 211.95427    | 50.4061 |

Totals : 4212.95532 453.18166

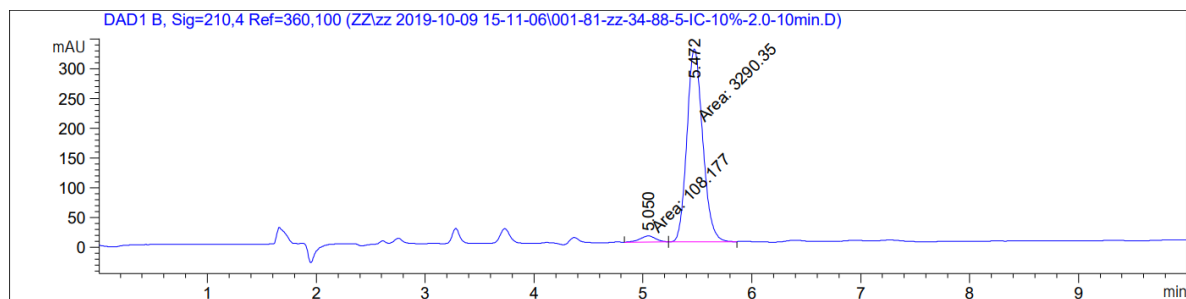

| Peak # | RetTime [min] | Type | Width [min] | Area [mAU*s] | Height [mAU] | Area %  |
|--------|---------------|------|-------------|--------------|--------------|---------|
| 1      | 5.050         | MM   | 0.1705      | 108.17698    | 10.57442     | 3.1831  |
| 2      | 5.472         | MM   | 0.1688      | 3290.35205   | 324.93680    | 96.8169 |

Totals : 3398.52903 335.51122

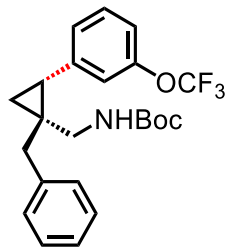

***tert*-Butyl (((1*S*,2*R*)-1-benzyl-2-(3-(trifluoromethoxy)phenyl)cyclopropyl)methyl)carbamate (4*i*')**

Following **General Procedure A** on 0.1 mmol scale. Purification by pTLC (toluene/EA) afforded the title compound (colorless oil, 24.0 mg, 57% yield, 94.5:5.5 er). The enantiomeric purity was determined by SFC analysis on a Chiralpak IC column (5% IPA/CO<sub>2</sub>, 2.0 mL/min) with retention time 4.52 min (minor) and 5.09 min (major).

<sup>1</sup>H NMR (600 MHz, CDCl<sub>3</sub>) δ 7.37 – 7.31 (m, 2H), 7.31 – 7.23 (m, 4H), 7.12 – 7.01 (m, 2H), 6.99 (s, 1H), 4.25 (br s, 1H), 2.90 (d, *J* = 14.1 Hz, 1H), 2.86 – 2.78 (m, 2H), 2.73 (d, *J* = 14.1 Hz, 1H), 2.24 – 2.15 (m, 1H), 1.40 (s, 9H), 1.12 – 1.05 (m, 1H), 1.05 – 0.98 (m, 1H).

<sup>13</sup>C NMR (150 MHz, CDCl<sub>3</sub>) δ 155.90, 149.40, 140.96, 138.92, 129.77, 129.62, 128.62, 127.08, 126.73, 121.52, 120.58 (q, *J* = 257.3 Hz), 118.79, 79.27, 42.86, 41.56, 29.07, 28.48, 27.60, 15.13. HRMS (ESI-TOF) Calcd for C<sub>18</sub>H<sub>19</sub>F<sub>3</sub>NO [M-Boc]: 322.1419; found: 322.1425.

The absolute stereochemistry was assigned by analogy to compound **3t'**.

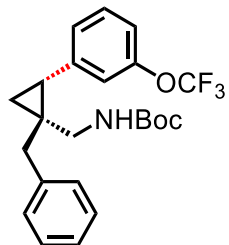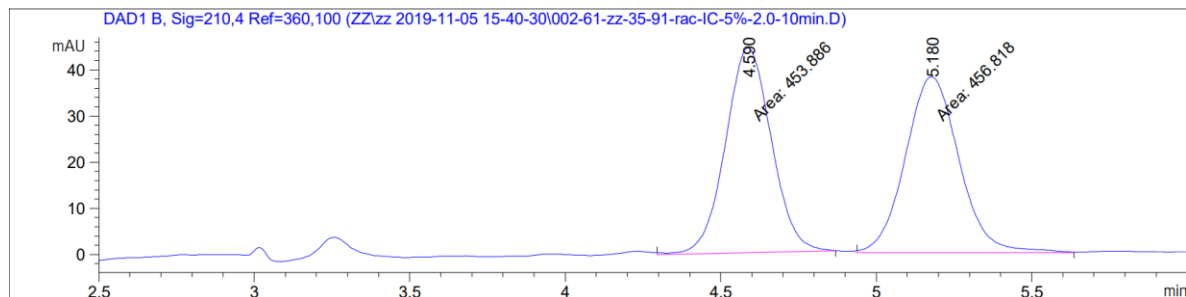

| Peak # | RetTime [min] | Type | Width [min] | Area [mAU*s] | Height [mAU] | Area %  |
|--------|---------------|------|-------------|--------------|--------------|---------|
| 1      | 4.590         | MM   | 0.1706      | 453.88605    | 44.34946     | 49.8390 |
| 2      | 5.180         | MM   | 0.2000      | 456.81824    | 38.05876     | 50.1610 |

Totals : 910.70428 82.40822

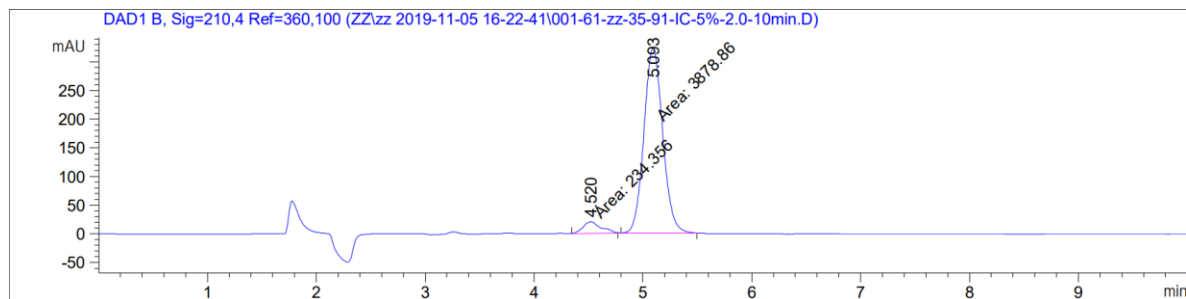

| Peak # | RetTime [min] | Type | Width [min] | Area [mAU*s] | Height [mAU] | Area %  |
|--------|---------------|------|-------------|--------------|--------------|---------|
| 1      | 4.520         | MM   | 0.1930      | 234.35570    | 20.23736     | 5.6976  |
| 2      | 5.093         | MM   | 0.1999      | 3878.86377   | 323.32617    | 94.3024 |

Totals : 4113.21947 343.56354

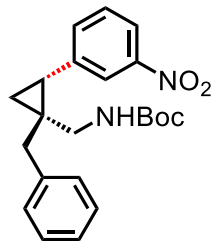

***tert*-Butyl (((1*S*,2*R*)-1-benzyl-2-(3-nitrophenyl)cyclopropyl)methyl)carbamate (4j')**

Following **General Procedure A** on 0.1 mmol scale. Purification by pTLC (hexane/EA) afforded the title compound (colorless oil, 19.5 mg, 51% yield, 96.5:3.5 er). The enantiomeric purity was determined by SFC analysis on a Chiralpak OD column (10% IPA/CO<sub>2</sub>, 2.0 mL/min) with retention time 7.18 min (minor) and 7.74 min (major).

<sup>1</sup>H NMR (600 MHz, CDCl<sub>3</sub>) δ 8.10 – 7.98 (m, 2H), 7.51 – 7.39 (m, 3H), 7.36 (t, *J* = 7.4 Hz, 2H), 7.29 (d, *J* = 7.0 Hz, 2H), 4.31 (br s, 1H), 2.96 (d, *J* = 14.1 Hz, 1H), 2.92 – 2.83 (m, 1H), 2.81 – 2.65 (m, 2H), 2.26 (t, *J* = 7.5 Hz, 1H), 1.39 (s, 9H), 1.21 (t, *J* = 5.7 Hz, 1H), 1.14 – 1.05 (m, 1H).

<sup>13</sup>C NMR (150 MHz, CDCl<sub>3</sub>) δ 155.80, 148.36, 140.75, 138.63, 134.99, 129.57, 129.32, 128.72, 126.89, 123.80, 121.48, 79.43, 42.80, 41.57, 29.34, 28.45, 27.46, 15.43.

HRMS (ESI-TOF) Calcd for C<sub>17</sub>H<sub>19</sub>N<sub>2</sub>O<sub>2</sub> [M-Boc]: 283.1447; found: 283.1446.

The absolute stereochemistry was assigned by analogy to compound **3t'**.

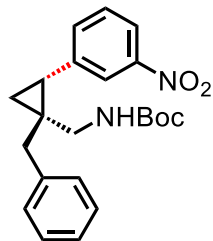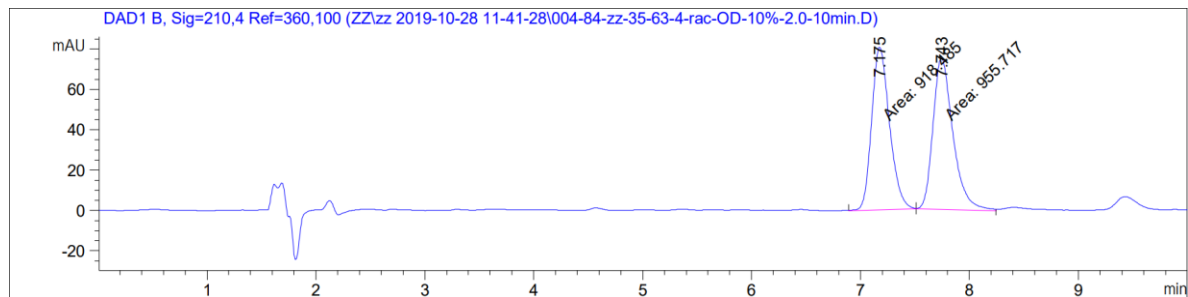

| Peak # | RetTime [min] | Type | Width [min] | Area [mAU*s] | Height [mAU] | Area %  |
|--------|---------------|------|-------------|--------------|--------------|---------|
| 1      | 7.175         | MM   | 0.1895      | 918.48474    | 80.76911     | 49.0067 |
| 2      | 7.743         | MM   | 0.2125      | 955.71667    | 74.94640     | 50.9933 |

Totals : 1874.20142 155.71551

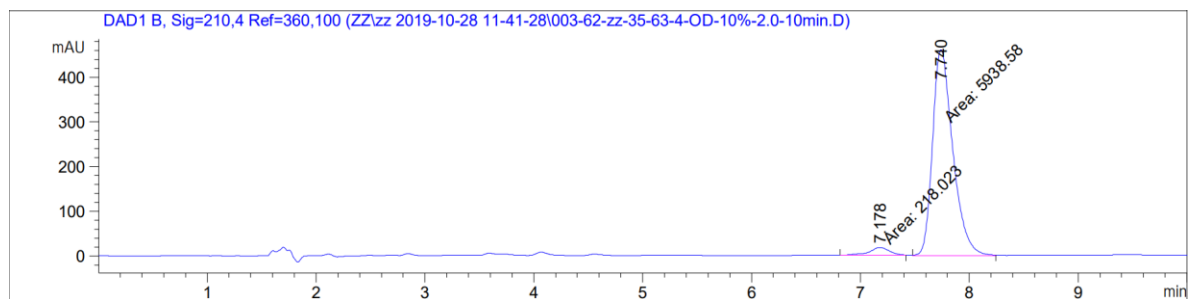

| Peak # | RetTime [min] | Type | Width [min] | Area [mAU*s] | Height [mAU] | Area %  |
|--------|---------------|------|-------------|--------------|--------------|---------|
| 1      | 7.178         | MM   | 0.2117      | 218.02339    | 17.16334     | 3.5413  |
| 2      | 7.740         | MM   | 0.2147      | 5938.57666   | 461.10233    | 96.4587 |

Totals : 6156.60005 478.26567



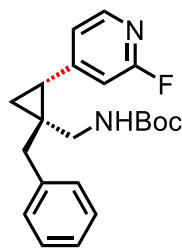

***tert*-Butyl (((1*S*,2*R*)-1-benzyl-2-(2-fluoropyridin-4-yl)cyclopropyl)methyl)carbamate (**4k'**)**

Following **General Procedure A** on 0.1 mmol scale by using Pd(OAc)<sub>2</sub> (15 mol%, 3.4 mg) and ligand **L6** (15 mol%, 3.6 mg). Purification by pTLC (hexane/EA) afforded the title compound (colorless oil, 15.0 mg, 42% yield, 94.5:5.5 er). The enantiomeric purity was determined by SFC analysis on a Chiralpak IC column (30% IPA/CO<sub>2</sub>, 2.0 mL/min) with retention time 5.08 min (minor) and 5.78 min (major).

<sup>1</sup>H NMR (600 MHz, CDCl<sub>3</sub>) δ 8.07 (d, *J* = 5.3 Hz, 1H), 7.35 (t, *J* = 7.5 Hz, 2H), 7.32 – 7.23 (m, 3H), 6.94 (d, *J* = 5.3 Hz, 1H), 6.68 (s, 1H), 4.28 (br s, 1H), 2.94 (d, *J* = 13.9 Hz, 1H), 2.91 – 2.80 (m, 2H), 2.73 (d, *J* = 13.9 Hz, 1H), 2.22 – 2.10 (m, 1H), 1.41 (s, 9H), 1.25 – 1.18 (m, 1H), 1.15 – 1.06 (m, 1H).

<sup>13</sup>C NMR (150 MHz, CDCl<sub>3</sub>) δ 164.20 (d, *J* = 238.6 Hz), 155.83, 154.10 (d, *J* = 7.0 Hz), 147.45 (d, *J* = 15.8 Hz), 138.37, 129.55, 128.77, 126.98, 121.78, 109.36 (d, *J* = 37.1 Hz), 79.57, 42.40, 41.66, 30.53, 28.48, 27.25 (d, *J* = 3.2 Hz), 15.75.

HRMS (ESI-TOF) Calcd for C<sub>21</sub>H<sub>26</sub>FN<sub>2</sub>O<sub>2</sub> [M+H]: 357.1978; found: 357.1982.

The absolute stereochemistry was assigned by analogy to compound **3t'**.

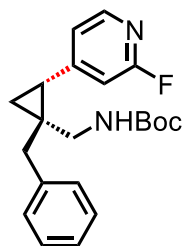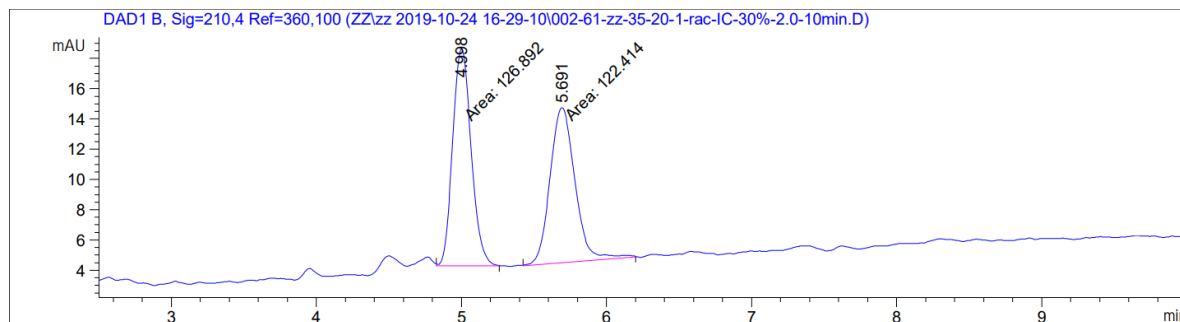

| Peak # | RetTime [min] | Type | Width [min] | Area [mAU*s] | Height [mAU] | Area %  |
|--------|---------------|------|-------------|--------------|--------------|---------|
| 1      | 4.998         | MM   | 0.1476      | 126.89172    | 14.33001     | 50.8980 |
| 2      | 5.691         | MM   | 0.1990      | 122.41425    | 10.25482     | 49.1020 |

Totals : 249.30598 24.58482

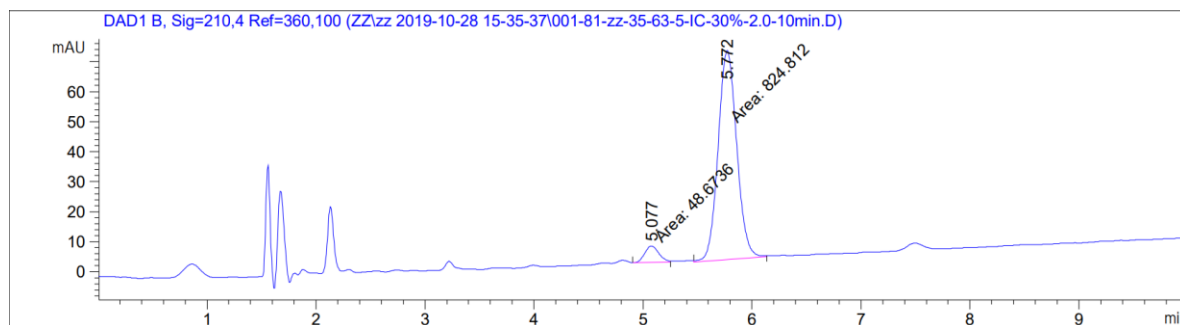

| Peak # | RetTime [min] | Type | Width [min] | Area [mAU*s] | Height [mAU] | Area %  |
|--------|---------------|------|-------------|--------------|--------------|---------|
| 1      | 5.077         | MM   | 0.1482      | 48.67357     | 5.47288      | 5.5723  |
| 2      | 5.772         | MM   | 0.1975      | 824.81219    | 69.59493     | 94.4277 |

Totals : 873.48577 75.06781

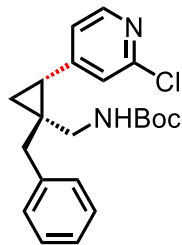

***tert*-Butyl (((1*S*,2*R*)-1-benzyl-2-(2-chloropyridin-4-yl)cyclopropyl)methyl)carbamate (**4l'**)**

Following **General Procedure A** on 0.1 mmol scale by using Pd(OAc)<sub>2</sub> (15 mol%, 3.4 mg) and ligand **L6** (15 mol%, 3.6 mg). Purification by pTLC (hexane/EA) afforded the title compound (colorless oil, 17.0 mg, 46% yield, 96.5:3.5 er). The enantiomeric purity was determined by SFC analysis on a Chiralpak IC column (30% IPA/CO<sub>2</sub>, 2.0 mL/min) with retention time 6.03 min (minor) and 6.45 min (major).

<sup>1</sup>H NMR (600 MHz, CDCl<sub>3</sub>) δ 8.23 (d, *J* = 5.1 Hz, 1H), 7.35 (t, *J* = 7.5 Hz, 2H), 7.28 (d, *J* = 7.5 Hz, 1H), 7.28 – 7.22 (m, 2H), 7.10 (s, 1H), 6.97 (d, *J* = 5.2 Hz, 1H), 4.27 (br s, 1H), 2.93 (d, *J* = 14.3 Hz, 1H), 2.90 – 2.79 (m, 2H), 2.74 (d, *J* = 14.3 Hz, 1H), 2.14 – 2.06 (m, 1H), 1.41 (s, 9H), 1.24 – 1.19 (m, 1H), 1.08 (dd, *J* = 8.0, 5.7 Hz, 1H).

<sup>13</sup>C NMR (150 MHz, CDCl<sub>3</sub>) δ 155.82, 151.84, 151.55, 149.48, 138.31, 129.56, 128.77, 126.99, 124.38, 122.70, 79.59, 42.48, 41.61, 30.52, 28.49, 27.02, 15.60.

HRMS (ESI-TOF) Calcd for C<sub>21</sub>H<sub>26</sub>ClN<sub>2</sub>O<sub>2</sub> [M+H]: 373.1683; found: 373.1683.

The absolute stereochemistry was assigned by analogy to compound **3t'**.

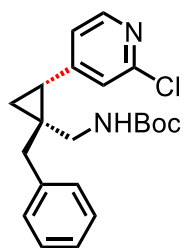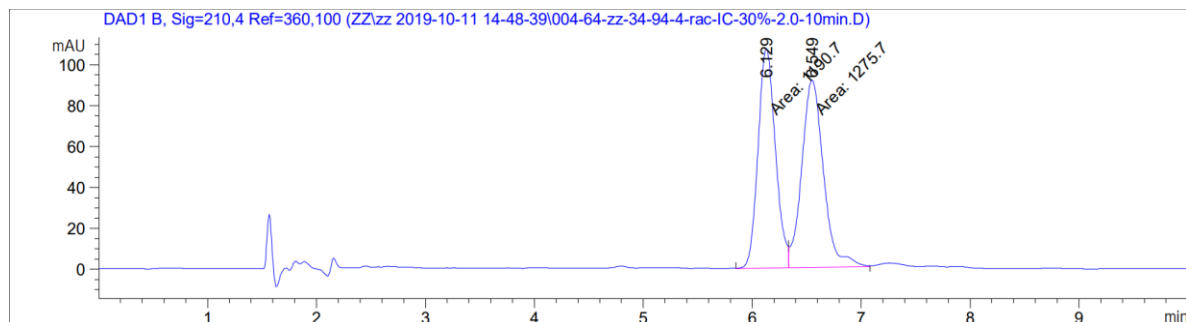

| Peak # | RetTime [min] | Type | Width [min] | Area [mAU*s] | Height [mAU] | Area %  |
|--------|---------------|------|-------------|--------------|--------------|---------|
| 1      | 6.129         | MF   | 0.1850      | 1190.70093   | 107.24229    | 48.2769 |
| 2      | 6.549         | FM   | 0.2321      | 1275.69580   | 91.60175     | 51.7231 |

Totals : 2466.39673 198.84405

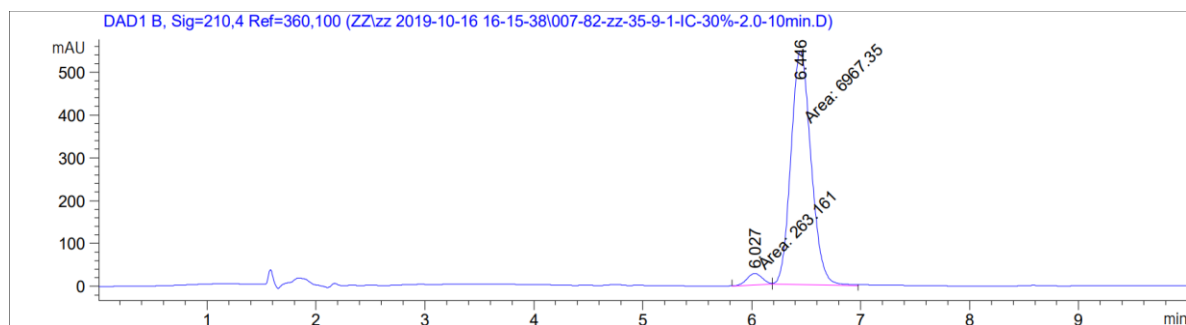

| Peak # | RetTime [min] | Type | Width [min] | Area [mAU*s] | Height [mAU] | Area %  |
|--------|---------------|------|-------------|--------------|--------------|---------|
| 1      | 6.027         | MM   | 0.1634      | 263.16058    | 26.84538     | 3.6396  |
| 2      | 6.446         | MM   | 0.2130      | 6967.35352   | 545.22614    | 96.3604 |

Totals : 7230.51410 572.07152

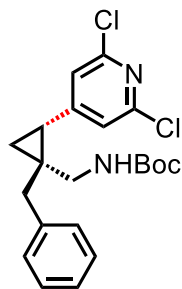

***tert*-Butyl (((1*S*,2*R*)-1-benzyl-2-(2,6-dichloropyridin-4-yl)cyclopropyl)methyl)carbamate (4*m*' )**

Following **General Procedure A** on 0.1 mmol scale by using Pd(OAc)<sub>2</sub> (15 mol%, 3.4 mg) and ligand **L6** (15 mol%, 3.6 mg). Purification by pTLC (hexane/EA) afforded the title compound (colorless oil, 15.0 mg, 37% yield, 95.5:4.5 er). The enantiomeric purity was determined by SFC analysis on a Chiralpak IC column (30% IPA/CO<sub>2</sub>, 2.0 mL/min) with retention time 3.68 min (minor) and 4.18 min (major).

<sup>1</sup>H NMR (600 MHz, CDCl<sub>3</sub>) δ 7.36 (t, *J* = 7.5 Hz, 2H), 7.32 – 7.26 (m, 1H), 7.23 (d, *J* = 7.5 Hz, 2H), 7.01 (s, 2H), 4.30 (br s, 1H), 2.98 – 2.88 (m, 2H), 2.88 – 2.79 (m, 1H), 2.74 (d, *J* = 14.1 Hz, 1H), 2.11 – 2.01 (m, 1H), 1.42 (s, 9H), 1.23 – 1.18 (m, 1H), 1.13 – 1.08 (m, 1H).

<sup>13</sup>C NMR (150 MHz, CDCl<sub>3</sub>) δ 155.76, 154.29, 150.66, 138.02, 129.55, 128.84, 127.11, 123.00, 79.72, 42.54, 41.47, 30.96, 28.48, 26.74, 15.91.

HRMS (ESI-TOF) Calcd for C<sub>21</sub>H<sub>25</sub>Cl<sub>2</sub>N<sub>2</sub>O<sub>2</sub> [M+H]: 407.1293; found: 407.1297.

The absolute stereochemistry was assigned by analogy to compound **3t'**.

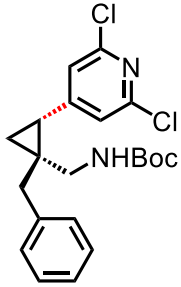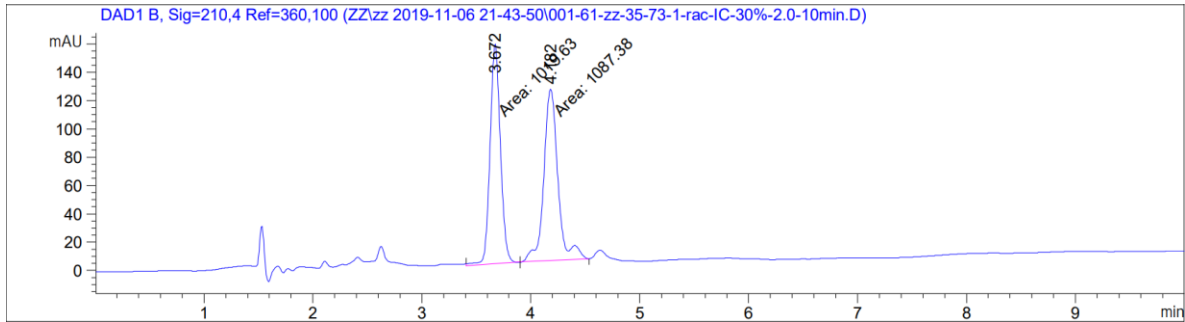

| Peak # | RetTime [min] | Type | Width [min] | Area [mAU*s] | Height [mAU] | Area %  |
|--------|---------------|------|-------------|--------------|--------------|---------|
| 1      | 3.672         | MM   | 0.1097      | 1019.62524   | 154.89294    | 48.3923 |
| 2      | 4.182         | MM   | 0.1496      | 1087.37549   | 121.10316    | 51.6077 |

Totals : 2107.00073 275.99610

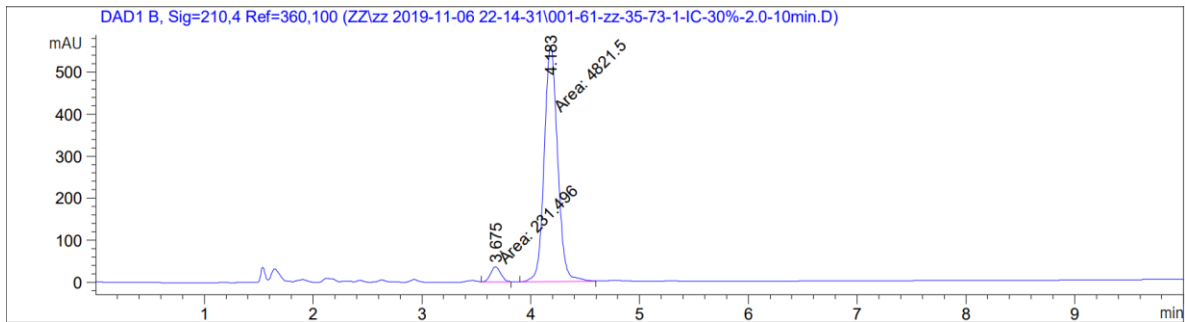

| Peak # | RetTime [min] | Type | Width [min] | Area [mAU*s] | Height [mAU] | Area %  |
|--------|---------------|------|-------------|--------------|--------------|---------|
| 1      | 3.675         | MM   | 0.1073      | 231.49638    | 35.95980     | 4.5814  |
| 2      | 4.183         | MM   | 0.1433      | 4821.50049   | 560.74500    | 95.4186 |

Totals : 5052.99687 596.70480

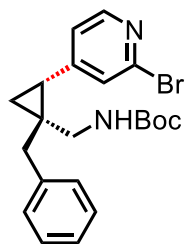

***tert*-Butyl (((1*S*,2*R*)-1-benzyl-2-(2-bromopyridin-4-yl)cyclopropyl)methyl)carbamate (4n')**

Following **General Procedure A** on 0.1 mmol scale by using Pd(OAc)<sub>2</sub> (15 mol%, 3.4 mg) and ligand **L6** (15 mol%, 3.6 mg). Purification by pTLC (hexane/EA) afforded the title compound (colorless oil, 17.0 mg, 41% yield, 96.5:3.5 er). The enantiomeric purity was determined by SFC analysis on a Chiralpak IC column (30% IPA/CO<sub>2</sub>, 2.0 mL/min) with retention time 6.71 min (minor) and 7.14 min (major).

<sup>1</sup>H NMR (600 MHz, CDCl<sub>3</sub>) δ 8.21 (d, *J* = 5.1 Hz, 1H), 7.35 (t, *J* = 7.5 Hz, 2H), 7.30 – 7.23 (m, 4H), 6.99 (d, *J* = 4.6 Hz, 1H), 4.28 (br s, 1H), 2.92 (d, *J* = 14.2 Hz, 1H), 2.88 – 2.78 (m, 2H), 2.74 (d, *J* = 14.2 Hz, 1H), 2.08 (t, *J* = 7.0 Hz, 1H), 1.41 (s, 9H), 1.23 – 1.18 (m, 1H), 1.10 – 1.04 (m, 1H).

<sup>13</sup>C NMR (150 MHz, CDCl<sub>3</sub>) δ 155.82, 151.31, 149.87, 142.59, 138.28, 129.56, 128.77, 128.19, 126.99, 123.05, 79.59, 42.49, 41.58, 30.54, 28.49, 26.90, 15.59.

HRMS (ESI-TOF) Calcd for C<sub>21</sub>H<sub>26</sub>BrN<sub>2</sub>O<sub>2</sub> [M+H]: 417.1178; found: 417.1171.

The absolute stereochemistry was assigned by analogy to compound **3t'**.

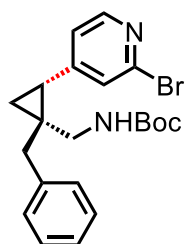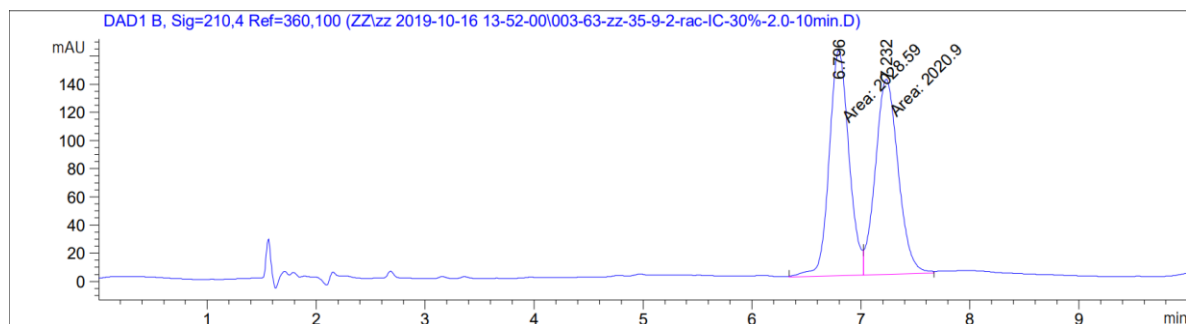

| Peak # | RetTime [min] | Type | Width [min] | Area [mAU*s] | Height [mAU] | Area %  |
|--------|---------------|------|-------------|--------------|--------------|---------|
| 1      | 6.796         | MF   | 0.2115      | 2028.59497   | 159.85562    | 50.0950 |
| 2      | 7.232         | FM   | 0.2431      | 2020.90076   | 138.55829    | 49.9050 |

Totals : 4049.49573 298.41391

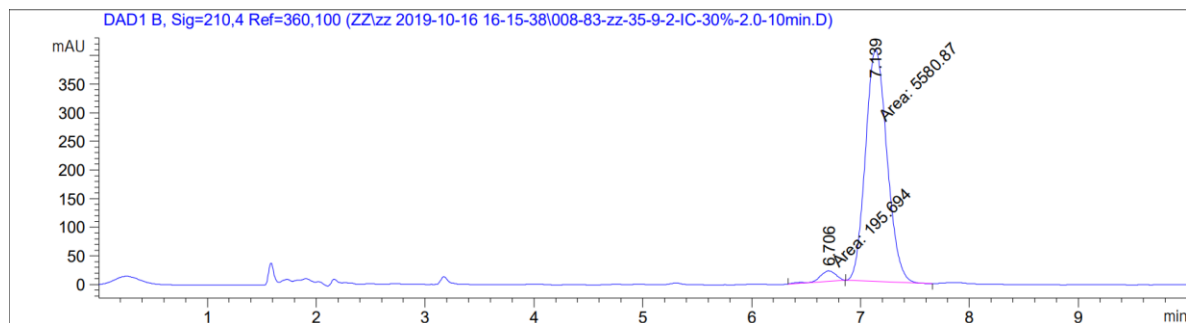

| Peak # | RetTime [min] | Type | Width [min] | Area [mAU*s] | Height [mAU] | Area %  |
|--------|---------------|------|-------------|--------------|--------------|---------|
| 1      | 6.706         | MM   | 0.1766      | 195.69365    | 18.46432     | 3.3877  |
| 2      | 7.139         | MM   | 0.2296      | 5580.86768   | 405.10892    | 96.6123 |

Totals : 5776.56133 423.57323



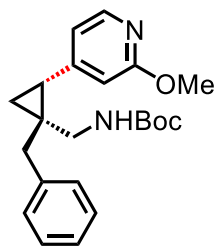

***tert*-Butyl (((1*S*,2*R*)-1-benzyl-2-(2-methoxypyridin-4-yl)cyclopropyl)methyl)carbamate (**40'**)**

Following **General Procedure A** on 0.1 mmol scale by using Pd(OAc)<sub>2</sub> (15 mol%, 3.4 mg) and ligand **L6** (15 mol%, 3.6 mg). Purification by pTLC (hexane/EA) afforded the title compound (colorless oil, 16.0 mg, 43% yield, 97:3 er). The enantiomeric purity was determined by SFC analysis on a Chiralpak OD column (10% IPA/CO<sub>2</sub>, 2.0 mL/min) with retention time 6.21 min (major) and 6.71 min (minor).

<sup>1</sup>H NMR (600 MHz, CDCl<sub>3</sub>) δ 8.01 (d, *J* = 5.3 Hz, 1H), 7.34 (t, *J* = 7.5 Hz, 2H), 7.28 – 7.24 (m, 3H), 6.66 (d, *J* = 5.3 Hz, 1H), 6.49 (s, 1H), 4.24 (br s, 1H), 3.90 (s, 3H), 2.94 (dd, *J* = 14.3, 6.8 Hz, 1H), 2.89 (d, *J* = 14.1 Hz, 1H), 2.85 – 2.78 (m, 1H), 2.74 (d, *J* = 14.1 Hz, 1H), 2.08 (t, *J* = 7.3 Hz, 1H), 1.40 (s, 9H), 1.13 (t, *J* = 5.9 Hz, 1H), 1.04 – 0.97 (m, 1H).

<sup>13</sup>C NMR (150 MHz, CDCl<sub>3</sub>) δ 164.60, 155.87, 150.67, 146.71, 138.67, 129.64, 128.65, 126.79, 117.69, 110.47, 79.36, 53.48, 42.52, 41.61, 29.82, 28.50, 27.21, 15.07.

HRMS (ESI-TOF) Calcd for C<sub>22</sub>H<sub>29</sub>N<sub>2</sub>O<sub>3</sub> [M+H]: 369.2178; found: 369.2172.

The absolute stereochemistry was assigned by analogy to compound **3t'**.

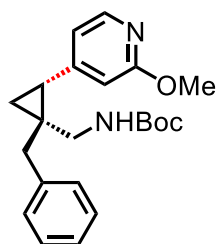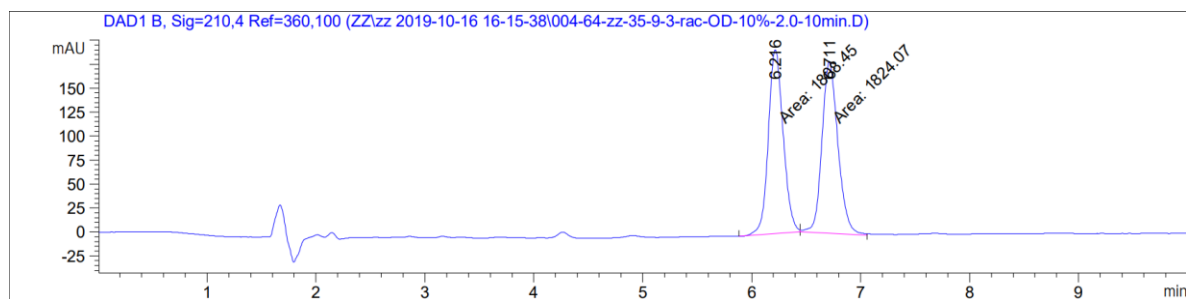

| Peak # | RetTime [min] | Type | Width [min] | Area [mAU*s] | Height [mAU] | Area %  |
|--------|---------------|------|-------------|--------------|--------------|---------|
| 1      | 6.216         | MM   | 0.1573      | 1808.44653   | 191.67393    | 49.7849 |
| 2      | 6.711         | MM   | 0.1708      | 1824.07288   | 178.02965    | 50.2151 |

Totals : 3632.51941 369.70358

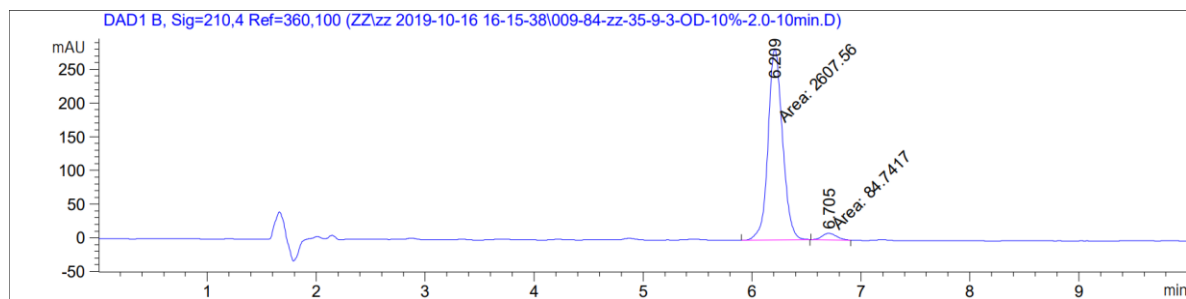

| Peak # | RetTime [min] | Type | Width [min] | Area [mAU*s] | Height [mAU] | Area %  |
|--------|---------------|------|-------------|--------------|--------------|---------|
| 1      | 6.209         | MM   | 0.1534      | 2607.56250   | 283.32437    | 96.8524 |
| 2      | 6.705         | MM   | 0.1476      | 84.74171     | 9.57119      | 3.1476  |

Totals : 2692.30421 292.89556

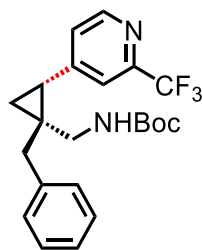

***tert*-Butyl** **(((1*S*,2*R*)-1-benzyl-2-(2-(trifluoromethyl)pyridin-4-yl)cyclopropyl)methyl)carbamate (4p')**

Following **General Procedure A** on 0.1 mmol scale by using Pd(OAc)<sub>2</sub> (15 mol%, 3.4 mg) and ligand **L6** (15 mol%, 3.6 mg). Purification by pTLC (hexane/EA) afforded the title compound (colorless oil, 16.0 mg, 39% yield, 96.5:3.5 er). The enantiomeric purity was determined by SFC analysis on a Chiralpak IC column (10% IPA/CO<sub>2</sub>, 2.0 mL/min) with retention time 6.23 min (minor) and 7.44 min (major).

<sup>1</sup>H NMR (600 MHz, CDCl<sub>3</sub>) δ 8.58 (d, *J* = 5.1 Hz, 1H), 7.45 (s, 1H), 7.39 – 7.33 (m, 2H), 7.31 – 7.25 (m, 3H), 7.22 (d, *J* = 4.9 Hz, 1H), 4.27 (br s, 1H), 2.96 (d, *J* = 14.1 Hz, 1H), 2.92 – 2.85 (m, 1H), 2.85 – 2.78 (m, 1H), 2.76 (d, *J* = 14.1 Hz, 1H), 2.26 – 2.12 (m, 1H), 1.39 (s, 9H), 1.32 – 1.27 (m, 1H), 1.18 – 1.11 (m, 1H).

<sup>13</sup>C NMR (150 MHz, CDCl<sub>3</sub>) δ 155.79, 150.23, 149.94, 148.29 (q, *J* = 33.9 Hz), 138.26, 129.53, 128.81, 127.06, 126.23, 121.69 (q, *J* = 274.4 Hz), 120.93, 79.62, 42.44, 41.71, 30.74, 28.45, 27.31, 15.80.

HRMS (ESI-TOF) Calcd for C<sub>22</sub>H<sub>26</sub>F<sub>3</sub>N<sub>2</sub>O<sub>2</sub> [M+H]: 407.1946; found: 407.1941.

The absolute stereochemistry was assigned by analogy to compound **3t'**.

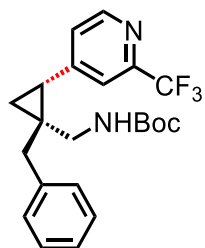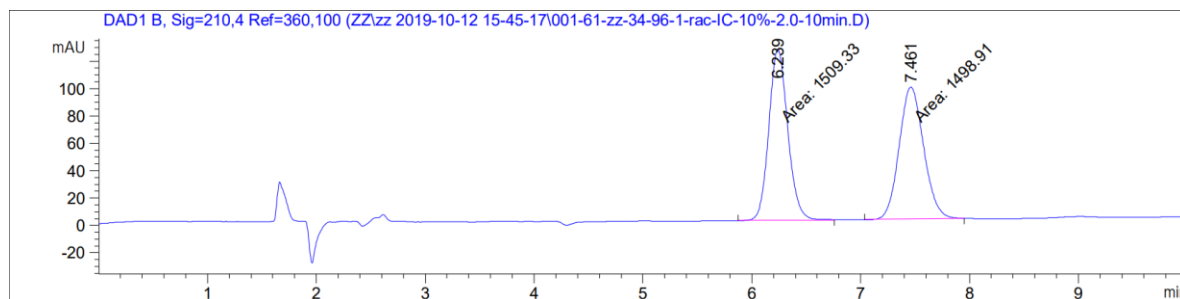

| Peak # | RetTime [min] | Type | Width [min] | Area [mAU*s] | Height [mAU] | Area %  |
|--------|---------------|------|-------------|--------------|--------------|---------|
| 1      | 6.239         | MM   | 0.2011      | 1509.33435   | 125.11450    | 50.1733 |
| 2      | 7.461         | MM   | 0.2597      | 1498.90588   | 96.18461     | 49.8267 |

Totals : 3008.24023 221.29911

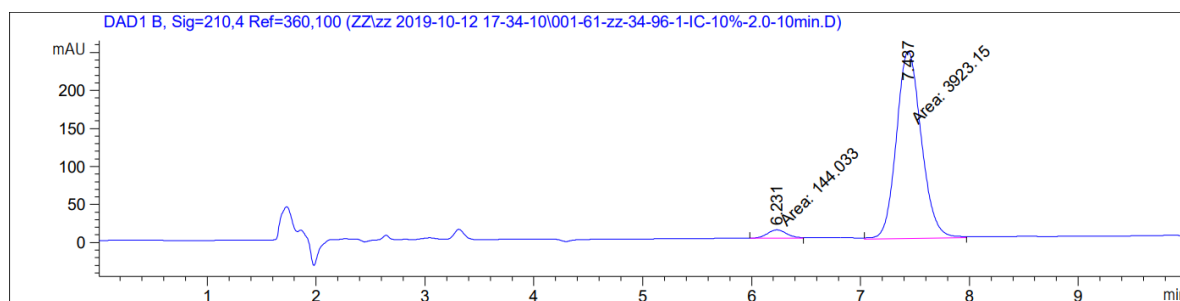

| Peak # | RetTime [min] | Type | Width [min] | Area [mAU*s] | Height [mAU] | Area %  |
|--------|---------------|------|-------------|--------------|--------------|---------|
| 1      | 6.231         | MM   | 0.2137      | 144.03255    | 11.23383     | 3.5413  |
| 2      | 7.437         | MM   | 0.2651      | 3923.14771   | 246.62218    | 96.4587 |

Totals : 4067.18025 257.85601

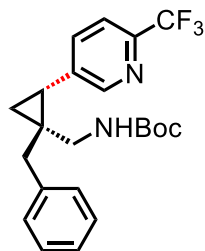

**tert-Butyl** **(((1S,2S)-1-benzyl-2-(6-(trifluoromethyl)pyridin-3-yl)cyclopropyl)methyl)carbamate (4q')**

Following **General Procedure A** on 0.1 mmol scale by using Pd(OAc)<sub>2</sub> (15 mol%, 3.4 mg) and ligand **L6** (15 mol%, 3.6 mg). Purification by pTLC (hexane/EA) afforded the title compound (colorless oil, 21.0 mg, 52% yield, 95.5:4.5 er). The enantiomeric purity was determined by SFC analysis on a Chiralpak IC column (20% IPA/CO<sub>2</sub>, 2.0 mL/min) with retention time 3.07 min (minor) and 6.06 min (major).

<sup>1</sup>H NMR (600 MHz, CDCl<sub>3</sub>) δ 8.54 (s, 1H), 7.57 (s, 2H), 7.35 (t, *J* = 7.5 Hz, 2H), 7.31 – 7.22 (m, 3H), 4.34 (br s, 1H), 3.00 (d, *J* = 14.3 Hz, 1H), 2.86 (dd, *J* = 14.9, 4.8 Hz, 1H), 2.76 – 2.63 (m, 2H), 2.24 (t, *J* = 7.5 Hz, 1H), 1.39 (s, 9H), 1.29 – 1.24 (m, 1H), 1.18 – 1.10 (m, 1H).

<sup>13</sup>C NMR (150 MHz, CDCl<sub>3</sub>) δ 158.86, 155.82, 151.08, 146.11 (q, *J* = 35.4 Hz), 138.53, 136.81, 129.44, 128.83, 127.02, 121.79 (q, *J* = 274.1 Hz), 120.12, 79.58, 42.52, 41.80, 29.83, 28.47, 25.35, 15.54.

HRMS (ESI-TOF) Calcd for C<sub>22</sub>H<sub>26</sub>F<sub>3</sub>N<sub>2</sub>O<sub>2</sub> [M+H]: 407.1946; found: 407.1937.

The absolute stereochemistry was assigned by analogy to compound **3t'**.

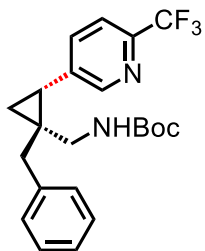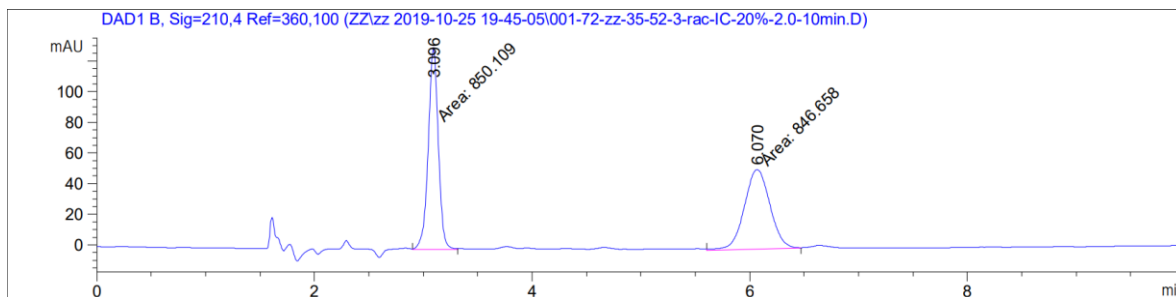

| Peak # | RetTime [min] | Type | Width [min] | Area [mAU*s] | Height [mAU] | Area %  |
|--------|---------------|------|-------------|--------------|--------------|---------|
| 1      | 3.096         | MM   | 0.1077      | 850.10938    | 131.57498    | 50.1017 |
| 2      | 6.070         | MM   | 0.2719      | 846.65778    | 51.89341     | 49.8983 |

Totals : 1696.76715 183.46839

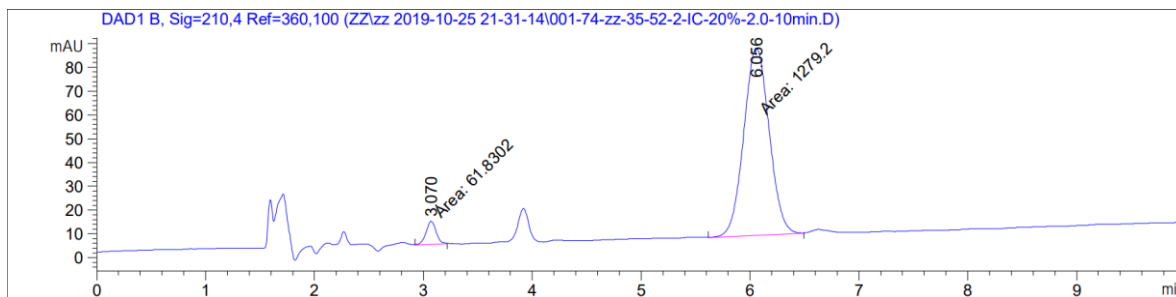

| Peak # | RetTime [min] | Type | Width [min] | Area [mAU*s] | Height [mAU] | Area %  |
|--------|---------------|------|-------------|--------------|--------------|---------|
| 1      | 3.070         | MM   | 0.1059      | 61.83019     | 9.73213      | 4.6107  |
| 2      | 6.056         | MM   | 0.2704      | 1279.19604   | 78.84225     | 95.3893 |

Totals : 1341.02624 88.57438

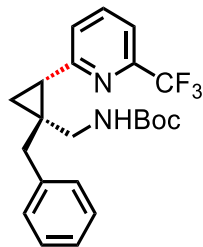

***tert*-Butyl** **(((1*S*,2*S*)-1-benzyl-2-(6-(trifluoromethyl)pyridin-2-yl)cyclopropyl)methyl)carbamate (4*r*' )**

Following **General Procedure A** on 0.1 mmol scale by using Pd(OAc)<sub>2</sub> (15 mol%, 3.4 mg) and ligand **L6** (15 mol%, 3.6 mg). Purification by pTLC (hexane/EA) afforded the title compound (colorless oil, 25.0 mg, 62% yield, 97.5:2.5 er). The enantiomeric purity was determined by SFC analysis on a Chiralpak IC column (10% IPA/CO<sub>2</sub>, 2.0 mL/min) with retention time 3.72 min (major) and 4.07 min (minor).

<sup>1</sup>H NMR (600 MHz, CDCl<sub>3</sub>) δ 7.77 (t, *J* = 7.8 Hz, 1H), 7.50 (d, *J* = 7.7 Hz, 1H), 7.42 (d, *J* = 8.2 Hz, 1H), 7.37 – 7.29 (m, 3H), 7.29 – 7.22 (m, 2H), 4.97 (br s, 1H), 3.39 (dd, *J* = 14.1, 7.4 Hz, 1H), 3.04 (d, *J* = 14.2 Hz, 1H), 2.81 (d, *J* = 14.2 Hz, 1H), 2.79 – 2.72 (m, 1H), 2.30 – 2.21 (m, 1H), 1.44 (s, 9H), 1.37 – 1.32 (m, 1H), 1.21 – 1.14 (m, 1H).

<sup>13</sup>C NMR (150 MHz, CDCl<sub>3</sub>) δ 160.60, 156.08, 147.55 (q, *J* = 34.3 Hz), 138.69, 137.63, 129.83, 128.51, 126.96, 126.62, 121.60 (q, *J* = 274.5 Hz), 117.77, 78.95, 42.18, 41.60, 30.93, 29.26, 28.50, 16.55.

HRMS (ESI-TOF) Calcd for C<sub>22</sub>H<sub>26</sub>F<sub>3</sub>N<sub>2</sub>O<sub>2</sub> [M+H]: 407.1946; found: 407.1942.

The absolute stereochemistry was assigned by analogy to compound **3t'**.

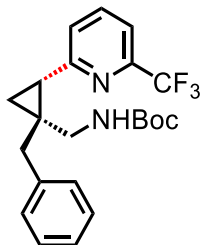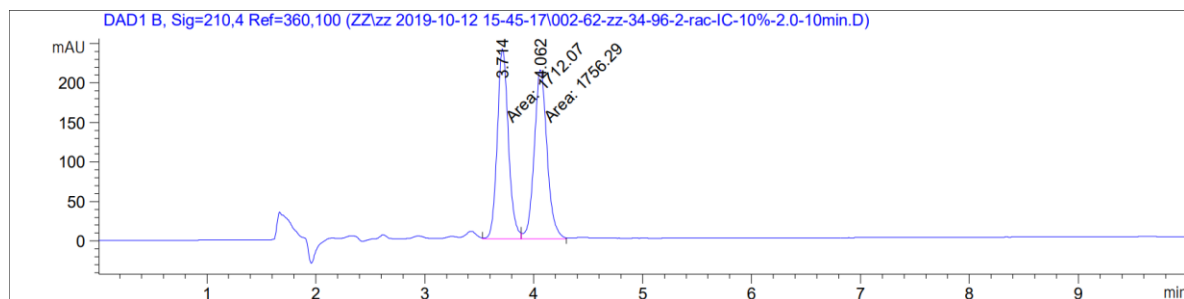

| Peak # | RetTime [min] | Type | Width [min] | Area [mAU*s] | Height [mAU] | Area %  |
|--------|---------------|------|-------------|--------------|--------------|---------|
| 1      | 3.714         | MF   | 0.1187      | 1712.06738   | 240.47415    | 49.3624 |
| 2      | 4.062         | FM   | 0.1366      | 1756.29358   | 214.35849    | 50.6376 |

Totals : 3468.36096 454.83264

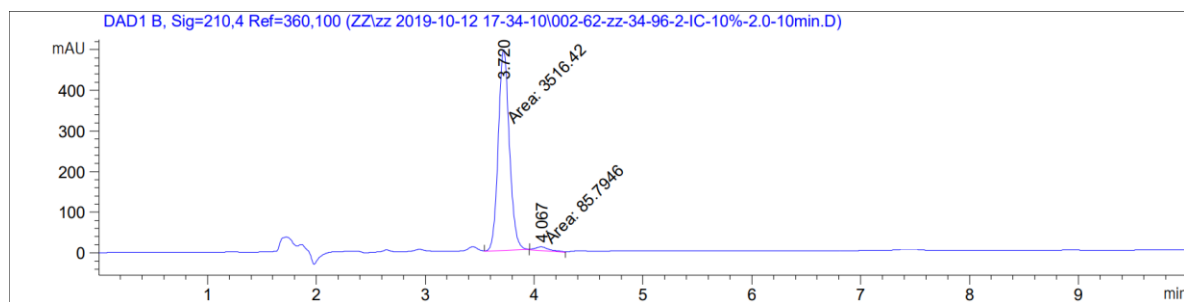

| Peak # | RetTime [min] | Type | Width [min] | Area [mAU*s] | Height [mAU] | Area %  |
|--------|---------------|------|-------------|--------------|--------------|---------|
| 1      | 3.720         | MM   | 0.1186      | 3516.42432   | 494.18491    | 97.6183 |
| 2      | 4.067         | MM   | 0.1591      | 85.79463     | 8.98958      | 2.3817  |

Totals : 3602.21895 503.17449



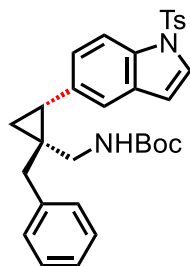

***tert*-Butyl (((1*S*,2*R*)-1-benzyl-2-(1-tosyl-1*H*-indol-5-yl)cyclopropyl)methyl)carbamate (4*s*' )**

Following **General Procedure A** on 0.1 mmol scale. Purification by pTLC (hexane/EA) afforded the title compound (colorless oil, 27.0 mg, 51% yield, 96.5:3.5 er). The enantiomeric purity was determined by SFC analysis on a Chiralpak IC column (30% IPA/CO<sub>2</sub>, 2.0 mL/min) with retention time 8.82 min (minor) and 9.30 min (major).

<sup>1</sup>H NMR (600 MHz, CDCl<sub>3</sub>) δ 7.83 (d, *J* = 8.4 Hz, 1H), 7.74 (d, *J* = 8.1 Hz, 2H), 7.51 (d, *J* = 3.7 Hz, 1H), 7.34 (t, *J* = 7.6 Hz, 2H), 7.31 – 7.26 (m, 2H), 7.26 – 7.19 (m, 4H), 7.08 (d, *J* = 8.8 Hz, 1H), 6.55 (d, *J* = 3.5 Hz, 1H), 4.24 (br s, 1H), 2.91 (d, *J* = 15.0 Hz, 1H), 2.86 – 2.77 (m, 1H), 2.76 – 2.63 (m, 2H), 2.33 (s, 3H), 2.25 (dd, *J* = 8.6, 6.0 Hz, 1H), 1.38 (s, 9H), 1.07 (t, *J* = 6.0 Hz, 1H), 1.00 – 0.94 (m, 1H).

<sup>13</sup>C NMR (150 MHz, CDCl<sub>3</sub>) δ 155.93, 145.01, 139.28, 135.43, 133.56, 133.44, 131.04, 130.05, 129.65, 128.54, 126.92, 126.70, 126.59, 126.02, 121.08, 113.37, 108.98, 79.14, 42.98, 41.70, 28.58, 28.50, 27.85, 21.71, 15.08.

HRMS (ESI-TOF) Calcd for C<sub>26</sub>H<sub>27</sub>N<sub>2</sub>O<sub>2</sub>S [M-Boc]: 431.1793; found: 431.1783.

The absolute stereochemistry was assigned by analogy to compound **3t'**.

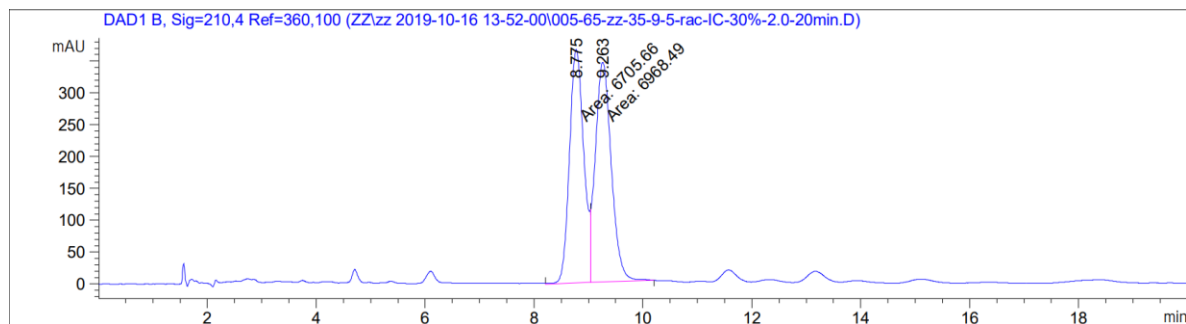

| Peak # | RetTime [min] | Type | Width [min] | Area [mAU*s] | Height [mAU] | Area %  |
|--------|---------------|------|-------------|--------------|--------------|---------|
| 1      | 8.775         | MF   | 0.3051      | 6705.65674   | 366.36597    | 49.0389 |
| 2      | 9.263         | FM   | 0.3367      | 6968.49170   | 344.98260    | 50.9611 |

Totals : 1.36741e4 711.34857

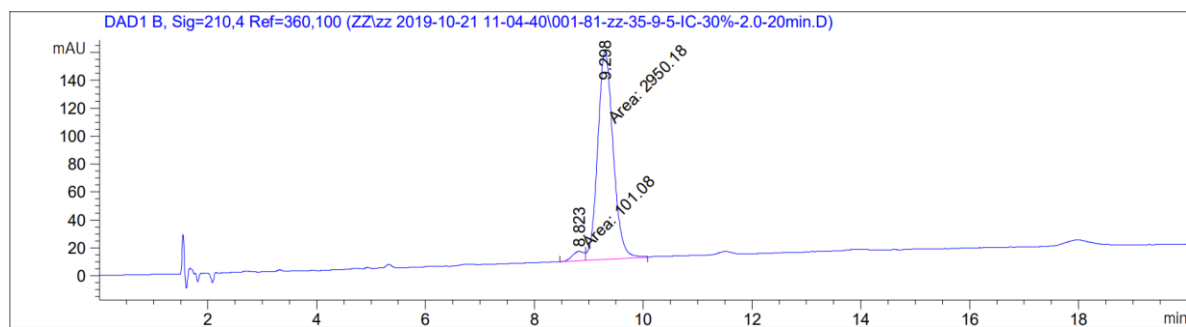

| Peak # | RetTime [min] | Type | Width [min] | Area [mAU*s] | Height [mAU] | Area %  |
|--------|---------------|------|-------------|--------------|--------------|---------|
| 1      | 8.823         | MF   | 0.2490      | 101.08009    | 6.76690      | 3.3127  |
| 2      | 9.298         | FM   | 0.3301      | 2950.18140   | 148.94737    | 96.6873 |

Totals : 3051.26149 155.71427

### General procedure for $\gamma$ -C(sp<sup>3</sup>)-H carbonylation

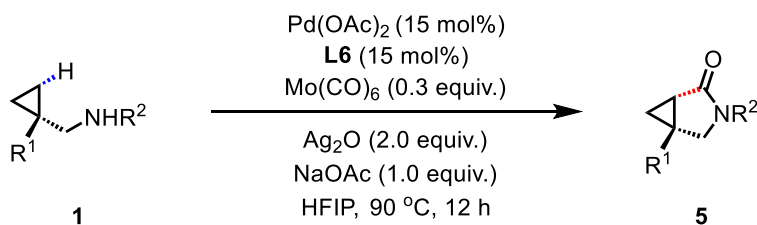

**General Procedure B:** In the culture tube, Pd(OAc)<sub>2</sub> (15 mol%, 3.4 mg), ligand **L6** (15 mol%, 3.6 mg), Mo(CO)<sub>6</sub> (0.3 equiv., 7.9 mg), Ag<sub>2</sub>O (2.0 equiv., 46.3 mg), NaOAc (1.0 equiv., 8.2 mg), and free aliphatic amine **1** (0.1 mmol) in order were weighed in air and placed with a magnetic stir bar. Then HFIP (0.1 mL) were added. The reaction mixture was stirred at rt for 3 min, and then heated to 90 °C for 12 h (150 rpm). After being allowed to cool to room temperature, the mixture was diluted with DCM, filtered through a Celite plug, and concentrated *in vacuo*. The crude mixture was purified by pTLC (hexane/EA) to afford the corresponding  $\gamma$ -lactam product.

### Substrate scope for $\gamma$ -C(sp<sup>3</sup>)-H carbonylation

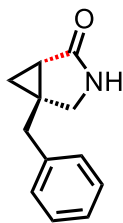

#### (1*S*,5*S*)-5-Benzyl-3-azabicyclo[3.1.0]hexan-2-one (**5a**)

Following **General Procedure B** on 0.1 mmol scale. Purification by pTLC (hexane/EA) afforded the title compound (colorless oil, 8.5 mg, 45% yield, 89.5:10.5 er). The enantiomeric purity was determined by SFC analysis on a Chiralpak AD column (20% IPA/CO<sub>2</sub>, 2.0 mL/min) with retention time 3.78 min (minor) and 4.14 min (major).

<sup>1</sup>H NMR (600 MHz, CDCl<sub>3</sub>)  $\delta$  7.36 – 7.28 (m, 2H), 7.26 – 7.22 (m, 1H), 7.21 – 7.14 (m, 2H), 5.18 (br s, 1H), 3.33 (d,  $J$  = 9.9 Hz, 1H), 3.27 (d,  $J$  = 9.9 Hz, 1H), 3.00 (d,  $J$  = 14.6 Hz, 1H), 2.84 (d,  $J$  = 14.6 Hz, 1H), 1.79 – 1.71 (m, 1H), 1.19 (dd,  $J$  = 8.8, 4.6 Hz, 1H), 0.95 – 0.89 (m, 1H).

<sup>13</sup>C NMR (150 MHz, CDCl<sub>3</sub>)  $\delta$  178.47, 138.13, 129.00, 128.77, 126.92, 47.61, 39.34, 27.82, 24.68, 18.38.

HRMS (ESI-TOF) Calcd for C<sub>12</sub>H<sub>14</sub>NO [M+H]: 188.1075; found: 188.1078.

The absolute stereochemistry was assigned by analogy to compound **3t'**.

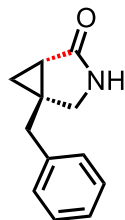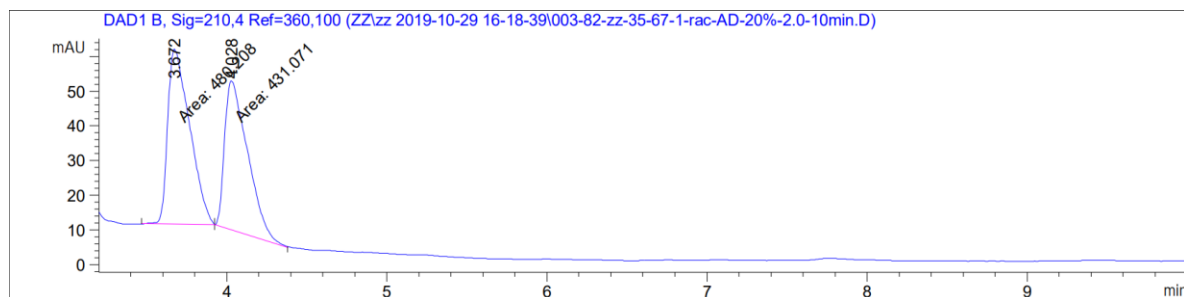

| Peak # | RetTime [min] | Type | Width [min] | Area [mAU*s] | Height [mAU] | Area %  |
|--------|---------------|------|-------------|--------------|--------------|---------|
| 1      | 3.672         | MM   | 0.1586      | 480.20758    | 50.45845     | 52.6960 |
| 2      | 4.028         | MM   | 0.1673      | 431.07092    | 42.94436     | 47.3040 |

Totals : 911.27850 93.40281

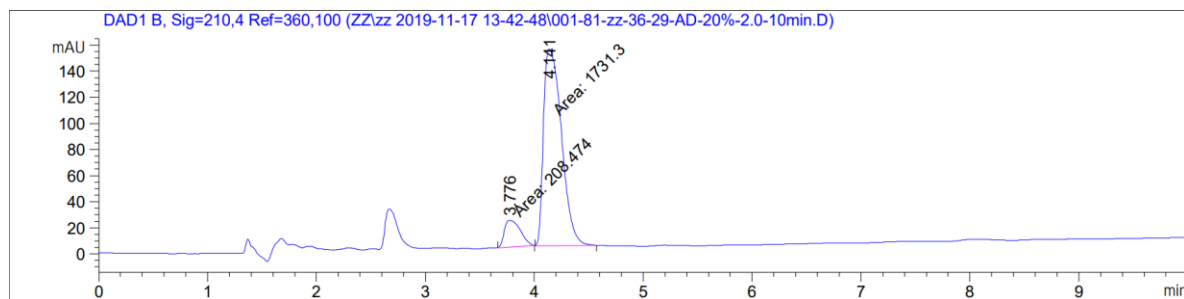

| Peak # | RetTime [min] | Type | Width [min] | Area [mAU*s] | Height [mAU] | Area %  |
|--------|---------------|------|-------------|--------------|--------------|---------|
| 1      | 3.776         | MM   | 0.1696      | 208.47360    | 20.48741     | 10.7473 |
| 2      | 4.141         | MM   | 0.1912      | 1731.30469   | 150.88240    | 89.2527 |

Totals : 1939.77829 171.36981

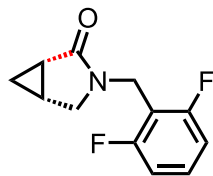

**(1*S*,5*R*)-3-(2,6-Difluorobenzyl)-3-azabicyclo[3.1.0]hexan-2-one (5b)**

Following **General Procedure B** on 0.1 mmol scale. Purification by pTLC (hexane/EA) afforded the title compound (colorless oil, 10.0 mg, 45% yield, 95:5 er). The enantiomeric purity was determined by SFC analysis on a Chiralpak IC column (30% IPA/CO<sub>2</sub>, 2.0 mL/min) with retention time 8.36 min (major) and 9.71 min (minor).

<sup>1</sup>H NMR (600 MHz, CDCl<sub>3</sub>) δ 7.30 – 7.24 (m, 1H), 6.95 – 6.87 (m, 2H), 4.57 (d, *J* = 14.4 Hz, 1H), 4.45 (d, *J* = 14.4 Hz, 1H), 3.42 (dd, *J* = 10.4, 5.9 Hz, 1H), 3.19 (d, *J* = 10.4 Hz, 1H), 1.99 – 1.91 (m, 1H), 1.85 – 1.77 (m, 1H), 1.08 (td, *J* = 7.9, 4.7 Hz, 1H), 0.58 – 0.51 (m, 1H).

<sup>13</sup>C NMR (150 MHz, CDCl<sub>3</sub>) δ 174.47, 161.82 (dd, *J* = 249.9, 7.8 Hz), 129.88 (t, *J* = 10.3 Hz), 112.26 (t, *J* = 19.4 Hz), 111.52 (dd, *J* = 20.9, 5.0 Hz), 48.45, 33.72 (t, *J* = 3.8 Hz), 20.12, 12.64, 11.78.

HRMS (ESI-TOF) Calcd for C<sub>12</sub>H<sub>12</sub>F<sub>2</sub>NO [M+H]: 224.0887; found: 224.0890.

The absolute stereochemistry was assigned by analogy to compound **3t'**.

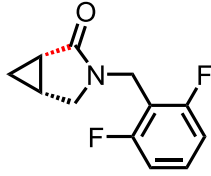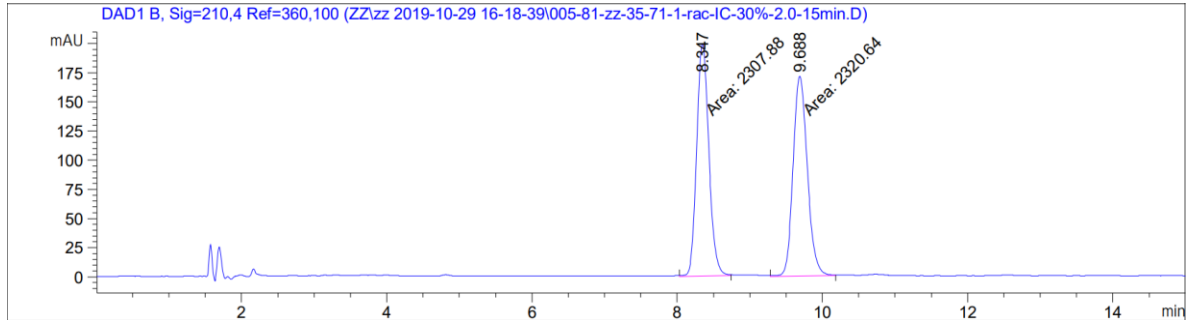

| Peak # | RetTime [min] | Type | Width [min] | Area [mAU*s] | Height [mAU] | Area %  |
|--------|---------------|------|-------------|--------------|--------------|---------|
| 1      | 8.347         | MM   | 0.1930      | 2307.88403   | 199.32324    | 49.8622 |
| 2      | 9.688         | MM   | 0.2259      | 2320.64453   | 171.25166    | 50.1378 |

Totals : 4628.52856 370.57491

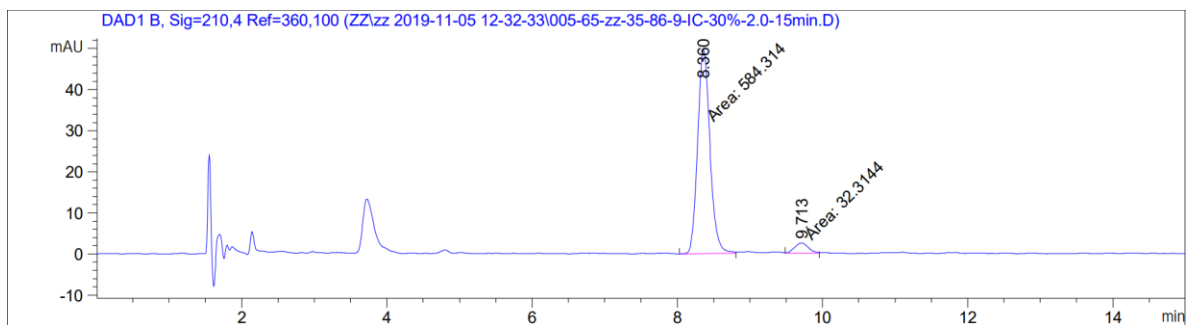

| Peak # | RetTime [min] | Type | Width [min] | Area [mAU*s] | Height [mAU] | Area %  |
|--------|---------------|------|-------------|--------------|--------------|---------|
| 1      | 8.360         | MM   | 0.1962      | 584.31390    | 49.63335     | 94.7595 |
| 2      | 9.713         | MM   | 0.2186      | 32.31441     | 2.46343      | 5.2405  |

Totals : 616.62831 52.09679

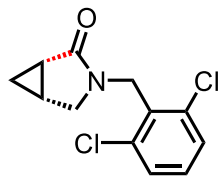

**(1*S*,5*R*)-3-(2,6-Dichlorobenzyl)-3-azabicyclo[3.1.0]hexan-2-one (5c)**

Following **General Procedure B** on 0.1 mmol scale. Purification by pTLC (hexane/EA) afforded the title compound (colorless oil, 11.0 mg, 43% yield, 97:3 er). The enantiomeric purity was determined by SFC analysis on a Chiralpak AS column (20% IPA/CO<sub>2</sub>, 2.0 mL/min) with retention time 6.30 min (minor) and 7.25 min (major).

<sup>1</sup>H NMR (600 MHz, CDCl<sub>3</sub>) δ 7.32 (d, *J* = 8.0 Hz, 2H), 7.19 (t, *J* = 8.0 Hz, 1H), 4.85 (d, *J* = 14.1 Hz, 1H), 4.56 (d, *J* = 14.1 Hz, 1H), 3.36 (dd, *J* = 10.2, 5.9 Hz, 1H), 2.98 (dd, *J* = 10.2, 1.7 Hz, 1H), 1.98 – 1.90 (m, 1H), 1.82 – 1.70 (m, 1H), 1.04 (td, *J* = 8.0, 4.6 Hz, 1H), 0.60 – 0.51 (m, 1H).

<sup>13</sup>C NMR (150 MHz, CDCl<sub>3</sub>) δ 174.36, 136.66, 131.78, 129.81, 128.62, 47.75, 41.33, 20.16, 12.61, 11.79.

HRMS (ESI-TOF) Calcd for C<sub>12</sub>H<sub>12</sub>Cl<sub>2</sub>NO [M+H]: 256.0296; found: 256.0299.

The absolute stereochemistry was assigned by analogy to compound **3t'**.



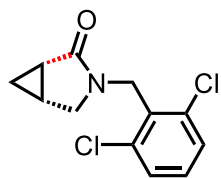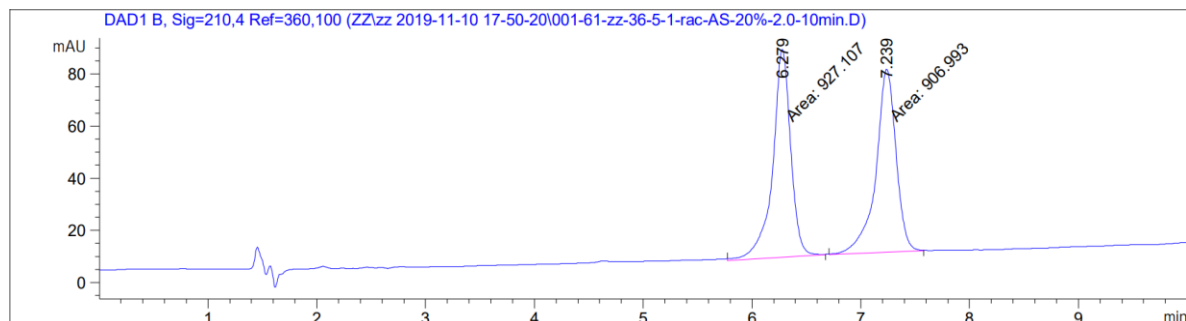

| Peak # | RetTime [min] | Type | Width [min] | Area [mAU*s] | Height [mAU] | Area %  |
|--------|---------------|------|-------------|--------------|--------------|---------|
| 1      | 6.279         | MM   | 0.1935      | 927.10669    | 79.84350     | 50.5483 |
| 2      | 7.239         | MM   | 0.2150      | 906.99304    | 70.30294     | 49.4517 |

Totals : 1834.09973 150.14644

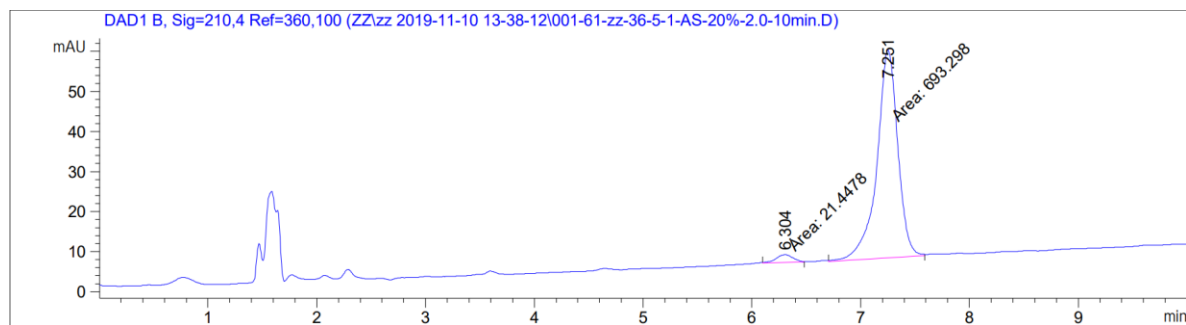

| Peak # | RetTime [min] | Type | Width [min] | Area [mAU*s] | Height [mAU] | Area %  |
|--------|---------------|------|-------------|--------------|--------------|---------|
| 1      | 6.304         | MM   | 0.1819      | 21.44777     | 1.96523      | 3.0008  |
| 2      | 7.251         | MM   | 0.2223      | 693.29767    | 51.97482     | 96.9992 |

Totals : 714.74544 53.94005

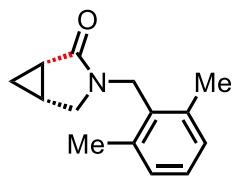

**(1*S*,5*R*)-3-(2,6-Dimethylbenzyl)-3-azabicyclo[3.1.0]hexan-2-one (5d)**

Following **General Procedure B** on 0.1 mmol scale. Purification by pTLC (hexane/EA) afforded the title compound (colorless oil, 13.5 mg, 63% yield, 95:5 er). The enantiomeric purity was determined by SFC analysis on a Chiralpak IC column (30% IPA/CO<sub>2</sub>, 2.0 mL/min) with retention time 8.52 min (major) and 9.32 min (minor).

<sup>1</sup>H NMR (600 MHz, CDCl<sub>3</sub>) δ 7.09 (t, *J* = 7.5 Hz, 1H), 7.01 (d, *J* = 7.5 Hz, 2H), 4.54 (d, *J* = 14.4 Hz, 1H), 4.35 (d, *J* = 14.4 Hz, 1H), 3.24 (dd, *J* = 10.3, 6.0 Hz, 1H), 2.94 (dd, *J* = 10.3, 1.8 Hz, 1H), 2.29 (s, 6H), 1.98 – 1.91 (m, 1H), 1.79 – 1.71 (m, 1H), 1.04 (td, *J* = 8.0, 4.8 Hz, 1H), 0.51 – 0.45 (m, 1H).

<sup>13</sup>C NMR (150 MHz, CDCl<sub>3</sub>) δ 174.41, 137.81, 132.40, 128.57, 127.83, 47.85, 40.17, 20.39, 20.09, 12.77, 11.81.

HRMS (ESI-TOF) Calcd for C<sub>14</sub>H<sub>18</sub>NO [M+H]: 216.1388; found: 216.1392.

The absolute stereochemistry was assigned by analogy to compound **3t'**.

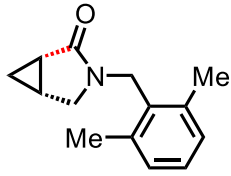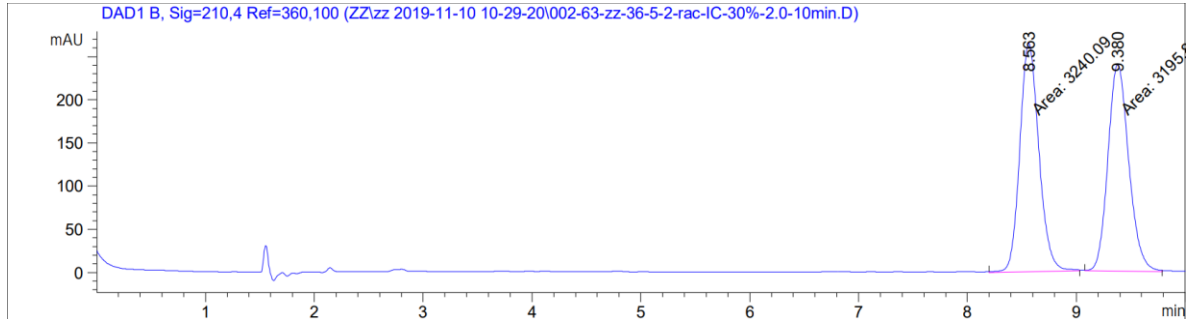

| Peak # | RetTime [min] | Type | Width [min] | Area [mAU*s] | Height [mAU] | Area %  |
|--------|---------------|------|-------------|--------------|--------------|---------|
| 1      | 8.563         | MM   | 0.2034      | 3240.09180   | 265.43857    | 50.3436 |
| 2      | 9.380         | MM   | 0.2215      | 3195.86865   | 240.47191    | 49.6564 |

Totals : 6435.96045 505.91048

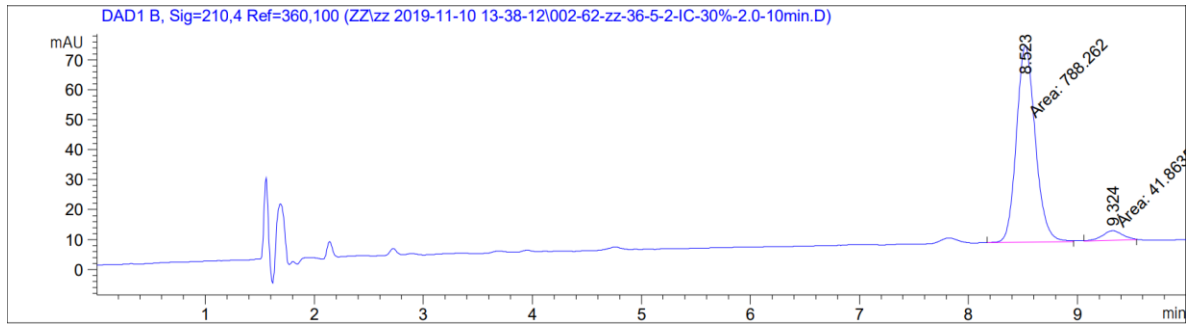

| Peak # | RetTime [min] | Type | Width [min] | Area [mAU*s] | Height [mAU] | Area %  |
|--------|---------------|------|-------------|--------------|--------------|---------|
| 1      | 8.523         | MM   | 0.2001      | 788.26239    | 65.64828     | 94.9570 |
| 2      | 9.324         | MM   | 0.2182      | 41.86349     | 3.19696      | 5.0430  |

Totals : 830.12589 68.84524

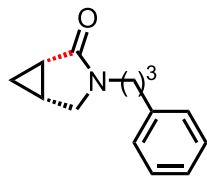

**(1*S*,5*R*)-3-(3-Phenylpropyl)-3-azabicyclo[3.1.0]hexan-2-one (5e)**

Following **General Procedure B** on 0.1 mmol scale. Purification by pTLC (hexane/EA) afforded the title compound (colorless oil, 7.0 mg, 33% yield, 93:7 er). The enantiomeric purity was determined by SFC analysis on a Chiralpak IC column (30% IPA/CO<sub>2</sub>, 2.0 mL/min) with retention time 8.80 min (major) and 10.91 min (minor).

<sup>1</sup>H NMR (600 MHz, CDCl<sub>3</sub>) δ 7.36 – 7.27 (m, 2H), 7.25 – 7.13 (m, 3H), 3.52 (dd, *J* = 10.2, 5.9 Hz, 1H), 3.33 – 3.24 (m, 2H), 3.24 – 3.16 (m, 1H), 2.61 (t, *J* = 7.9 Hz, 2H), 1.97 – 1.91 (m, 1H), 1.88 – 1.74 (m, 3H), 1.11 (td, *J* = 8.0, 4.7 Hz, 1H), 0.59 – 0.52 (m, 1H).

<sup>13</sup>C NMR (150 MHz, CDCl<sub>3</sub>) δ 175.15, 141.62, 128.57, 128.45, 126.11, 49.26, 41.99, 33.28, 29.44, 20.60, 12.83, 11.90.

HRMS (ESI-TOF) Calcd for C<sub>14</sub>H<sub>18</sub>NO [M+H]: 216.1388; found: 216.1393.

The absolute stereochemistry was assigned by analogy to compound **3t'**.

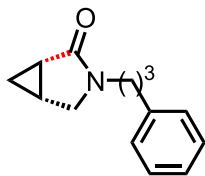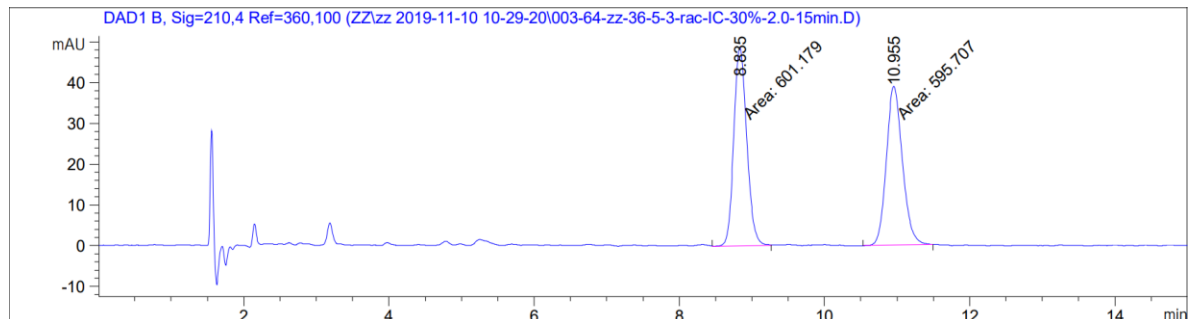

| Peak # | RetTime [min] | Type | Width [min] | Area [mAU*s] | Height [mAU] | Area %  |
|--------|---------------|------|-------------|--------------|--------------|---------|
| 1      | 8.835         | MM   | 0.2059      | 601.17883    | 48.66322     | 50.2286 |
| 2      | 10.955        | MM   | 0.2553      | 595.70728    | 38.89220     | 49.7714 |

Totals : 1196.88611 87.55542

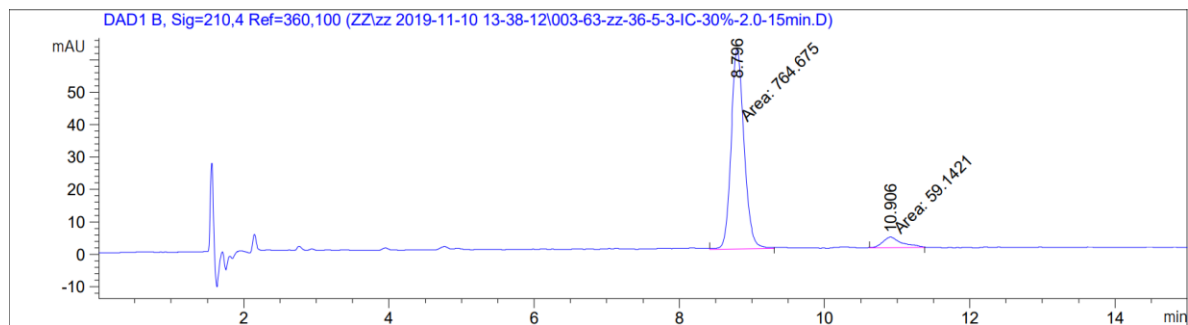

| Peak # | RetTime [min] | Type | Width [min] | Area [mAU*s] | Height [mAU] | Area %  |
|--------|---------------|------|-------------|--------------|--------------|---------|
| 1      | 8.796         | MM   | 0.2070      | 764.67456    | 61.57568     | 92.8210 |
| 2      | 10.906        | MM   | 0.3034      | 59.14210     | 3.24893      | 7.1790  |

Totals : 823.81666 64.82461

## General procedure for $\gamma$ -C(sp<sup>3</sup>)-H olefination

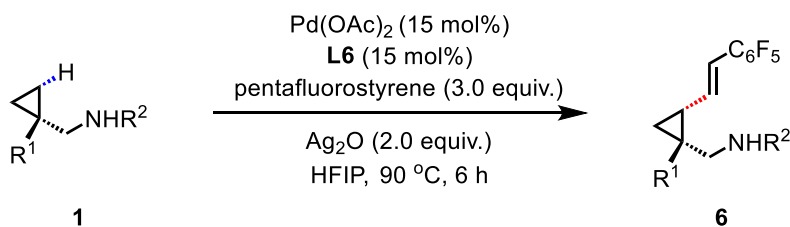

**General Procedure C:** In the culture tube, Pd(OAc)<sub>2</sub> (15 mol%, 3.4 mg), ligand **L6** (15 mol%, 3.6 mg), pentafluorostyrene (3.0 equiv., ), Ag<sub>2</sub>O (2.0 equiv., 46.3 mg), and free aliphatic amine **1** (0.1 mmol) in order were weighed in air and placed with a magnetic stir bar. Then HFIP (0.1 mL) were added. The reaction mixture was stirred at rt for 3 min, and then heated to 90 °C for 6 h (150 rpm). After being allowed to cool to room temperature, the mixture was diluted with DCM, filtered through a Celite plug, and concentrated *in vacuo*. When using secondary amine as substrate, the resulting mixture was purified by pTLC (hexane/EA) to afford the corresponding  $\gamma$ -olefination product. When using primary amine as substrate, the resulting mixture was dissolved in DCM (1.0 mL) and treated with Boc<sub>2</sub>O (2.0 equiv., 46  $\mu$ L) (HFIP residue can catalyze Boc protection of free amines<sup>6</sup>). After being stirred at rt for 1 h, the crude mixture was concentrated *in vacuo* and purified by pTLC (hexane/EA or toluene/EA) to afford the corresponding Boc-protected amine.

### Substrate scope for $\gamma$ -C(sp<sup>3</sup>)-H olefination

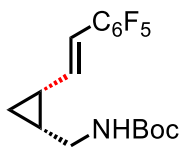

#### *tert*-Butyl (((1*R*,2*R*)-2-((*E*)-2-(perfluorophenyl)vinyl)cyclopropyl)methyl)carbamate (**6a'**)

Following **General Procedure C** on 0.1 mmol scale. Purification by pTLC (hexane/EA) afforded the title compound (colorless oil, 14.0 mg, 39% yield, 95.5:4.5 er). The enantiomeric purity was determined by SFC analysis on a Chiralpak IC column (10% IPA/CO<sub>2</sub>, 2.0 mL/min) with retention time 3.82 min (minor) and 5.73 min (major).

<sup>1</sup>H NMR (600 MHz, CDCl<sub>3</sub>)  $\delta$  6.42 (d,  $J$  = 16.2 Hz, 1H), 6.27 (dd,  $J$  = 16.2, 9.2 Hz, 1H), 4.58 (br s, 1H), 3.50 – 3.38 (m, 1H), 3.06 – 2.95 (m, 1H), 1.81 – 1.71 (m, 1H), 1.43 (s, 10H), 1.13 (td,  $J$  = 8.2, 5.2 Hz, 1H), 0.66 – 0.59 (m, 1H).

<sup>13</sup>C NMR (150 MHz, CDCl<sub>3</sub>)  $\delta$  155.83, 139.61, 114.56, 79.50, 41.10, 28.52, 20.62, 20.24, 13.04.

HRMS (ESI-TOF) Calcd for C<sub>12</sub>H<sub>11</sub>F<sub>5</sub>N [M-Boc]: 264.0812; found: 264.0814.

The absolute stereochemistry was assigned by analogy to compound **3t'**.

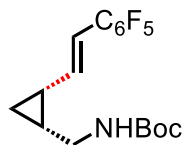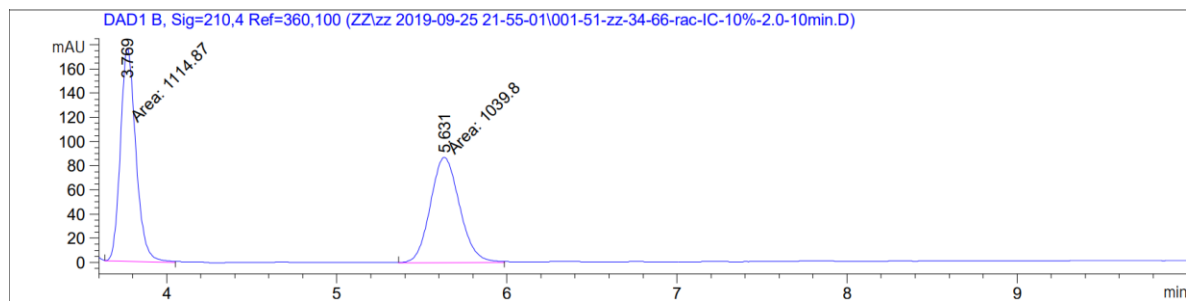

| Peak # | RetTime [min] | Type | Width [min] | Area [mAU*s] | Height [mAU] | Area %  |
|--------|---------------|------|-------------|--------------|--------------|---------|
| 1      | 3.769         | MM   | 0.1052      | 1114.87048   | 176.70636    | 51.7421 |
| 2      | 5.631         | MM   | 0.1990      | 1039.79846   | 87.10205     | 48.2579 |

Totals : 2154.66895 263.80841

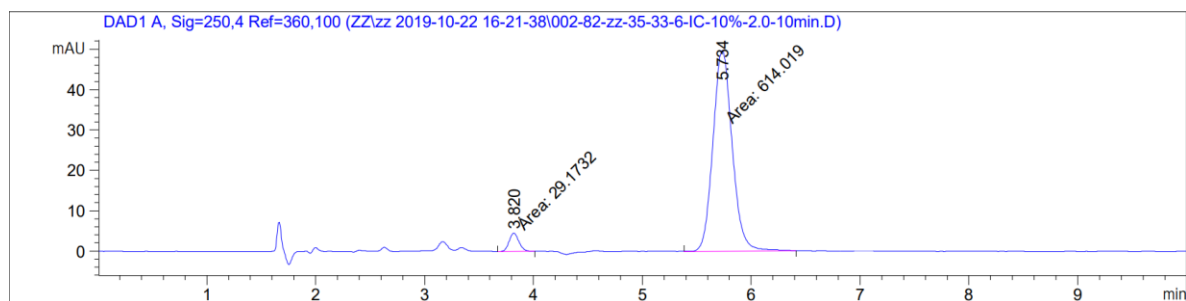

| Peak # | RetTime [min] | Type | Width [min] | Area [mAU*s] | Height [mAU] | Area %  |
|--------|---------------|------|-------------|--------------|--------------|---------|
| 1      | 3.820         | MM   | 0.1065      | 29.17324     | 4.56623      | 4.5357  |
| 2      | 5.734         | MM   | 0.2054      | 614.01947    | 49.83403     | 95.4643 |

Totals : 643.19271 54.40025



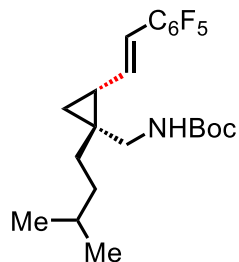

***tert*-Butyl**

**(((1*R*,2*R*)-1-isopentyl-2-((*E*)-2-**

**(perfluorophenyl)vinyl)cyclopropyl)methyl)carbamate (6b')**

Following **General Procedure C** on 0.1 mmol scale. Purification by pTLC (hexane/EA) afforded the title compound (colorless oil, 15.0 mg, 33% yield, 94:6 er). The enantiomeric purity was determined by SFC analysis on a Chiralpak AD column (3% IPA/CO<sub>2</sub>, 2.0 mL/min) with retention time 2.69 min (minor) and 2.91 min (major).

<sup>1</sup>H NMR (600 MHz, CDCl<sub>3</sub>) δ 6.42 (d, *J* = 16.1 Hz, 1H), 6.37 – 6.21 (m, 1H), 4.47 (br s, 1H), 3.60 – 3.42 (m, 1H), 3.07 – 2.89 (m, 1H), 1.63 – 1.53 (m, 4H), 1.45 (s, 9H), 1.40 – 1.32 (m, 1H), 1.26 – 1.17 (m, 1H), 1.00 – 0.94 (m, 1H), 0.91 (d, *J* = 6.2 Hz, 6H), 0.79 (s, 1H).

<sup>13</sup>C NMR (150 MHz, CDCl<sub>3</sub>) δ 155.93, 140.15, 114.27, 79.39, 42.90, 35.28, 34.00, 29.75, 28.50, 28.36, 27.58, 22.78, 22.62, 20.27.

HRMS (ESI-TOF) Calcd for C<sub>17</sub>H<sub>21</sub>F<sub>5</sub>N [M-Boc]: 334.1594; found: 334.1595.

The absolute stereochemistry was assigned by analogy to compound **3t'**.

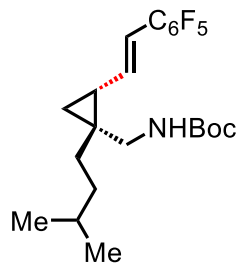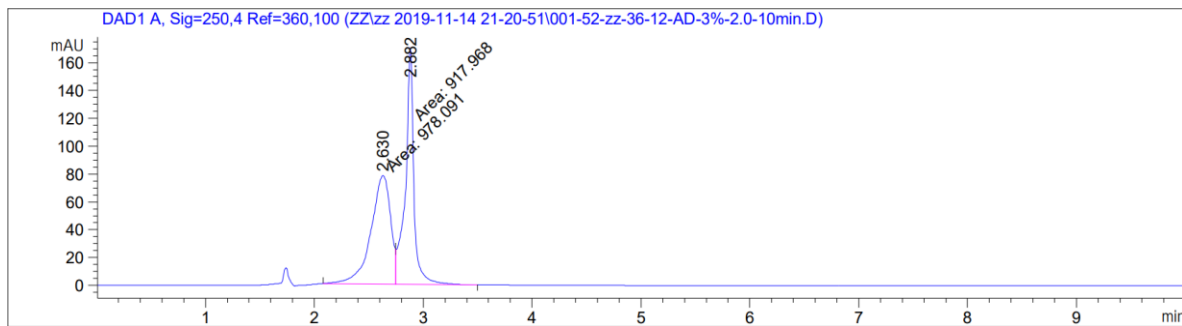

| Peak # | RetTime [min] | Type | Width [min] | Area [mAU*s] | Height [mAU] | Area %  |
|--------|---------------|------|-------------|--------------|--------------|---------|
| 1      | 2.630         | MF   | 0.2093      | 978.09076    | 77.89690     | 51.5855 |
| 2      | 2.882         | FM   | 0.0898      | 917.96844    | 170.30934    | 48.4145 |

Totals : 1896.05920 248.20624

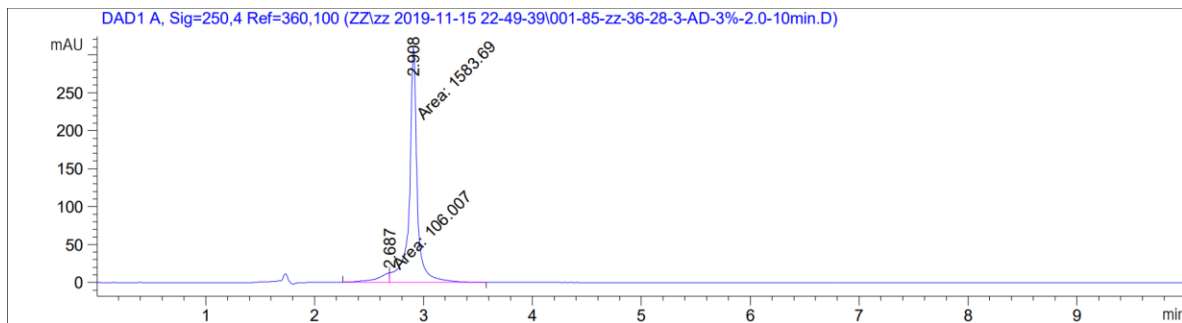

| Peak # | RetTime [min] | Type | Width [min] | Area [mAU*s] | Height [mAU] | Area %  |
|--------|---------------|------|-------------|--------------|--------------|---------|
| 1      | 2.687         | MF   | 0.1383      | 106.00673    | 12.77074     | 6.2737  |
| 2      | 2.908         | FM   | 0.0851      | 1583.69434   | 310.12543    | 93.7263 |

Totals : 1689.70107 322.89617

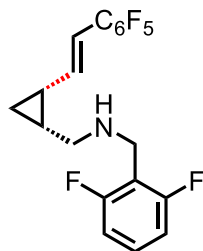

***N*-(2,6-Difluorobenzyl)-1-((1*R*,2*R*)-2-((*E*)-2-(perfluorophenyl)vinyl)cyclopropyl)methanamine (6c)**

Following **General Procedure C** on 0.1 mmol scale. Purification by pTLC (hexane/EA) afforded the title compound (colorless oil, 20.0 mg, 51% yield, 96:4 er). The enantiomeric purity was determined by SFC analysis on a Chiralpak AD column (10% IPA/CO<sub>2</sub>, 2.0 mL/min) with retention time 2.41 min (major) and 3.06 min (minor).

<sup>1</sup>H NMR (600 MHz, CDCl<sub>3</sub>) δ 7.21 – 7.13 (m, 1H), 6.80 (t, *J* = 7.7 Hz, 2H), 6.38 (d, *J* = 16.2 Hz, 1H), 6.15 (dd, *J* = 16.2, 9.5 Hz, 1H), 3.92 (d, *J* = 13.1 Hz, 1H), 3.85 (d, *J* = 13.1 Hz, 1H), 2.86 (dd, *J* = 12.2, 5.9 Hz, 1H), 2.50 – 2.44 (m, 1H), 1.76 – 1.67 (m, 1H), 1.47 – 1.41 (m, 1H), 1.11 (td, *J* = 8.2, 5.0 Hz, 1H), 0.59 – 0.53 (m, 1H).

<sup>13</sup>C NMR (150 MHz, CDCl<sub>3</sub>) δ 161.81 (dd, *J* = 247.3, 8.6 Hz), 140.00, 128.91 (t, *J* = 10.3 Hz), 115.84 (t, *J* = 20.6 Hz), 114.12, 111.23 (dd, *J* = 20.9, 5.4 Hz), 49.10, 40.70, 20.59, 20.45, 13.28.

HRMS (ESI-TOF) Calcd for C<sub>19</sub>H<sub>15</sub>F<sub>7</sub>N [M+H]: 390.1093; found: 390.1092.

The absolute stereochemistry was assigned by analogy to compound **3t'**.

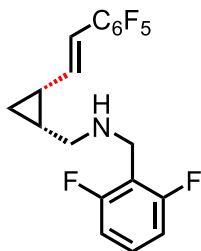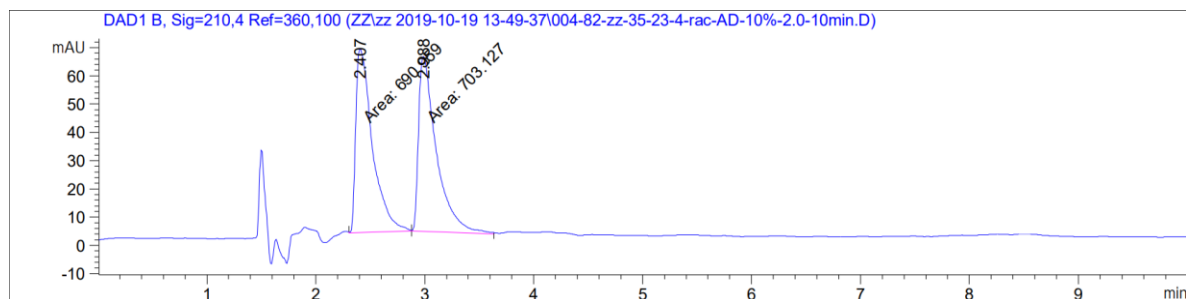

| Peak # | RetTime [min] | Type | Width [min] | Area [mAU*s] | Height [mAU] | Area %  |
|--------|---------------|------|-------------|--------------|--------------|---------|
| 1      | 2.407         | MM   | 0.1773      | 690.95886    | 64.95244     | 49.5636 |
| 2      | 2.988         | MM   | 0.1892      | 703.12665    | 61.94228     | 50.4364 |

Totals : 1394.08551 126.89472

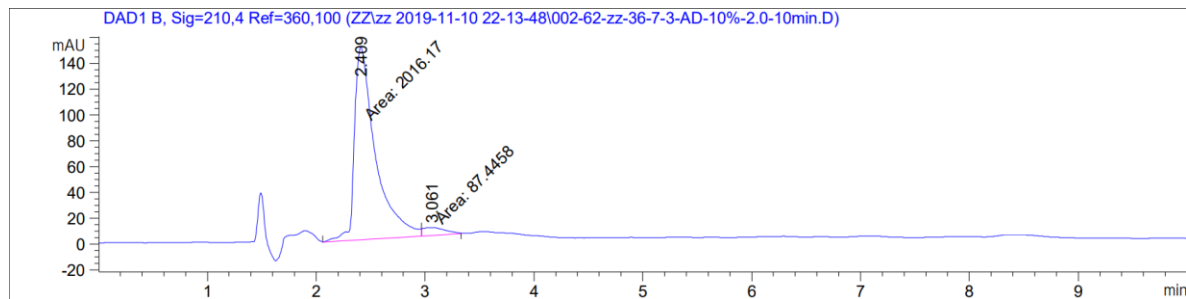

| Peak # | RetTime [min] | Type | Width [min] | Area [mAU*s] | Height [mAU] | Area %  |
|--------|---------------|------|-------------|--------------|--------------|---------|
| 1      | 2.409         | MF   | 0.2249      | 2016.17139   | 149.38541    | 95.8431 |
| 2      | 3.061         | FM   | 0.2364      | 87.44581     | 6.16533      | 4.1569  |

Totals : 2103.61720 155.55073

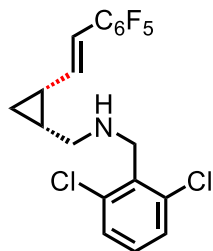

***N*-(2,6-Difluorobenzyl)-1-((1*R*,2*R*)-2-((*E*)-2-(perfluorophenyl)vinyl)cyclopropyl)methanamine (6d)**

Following **General Procedure C** on 0.1 mmol scale. Purification by pTLC (hexane/EA) afforded the title compound (colorless oil, 17.0 mg, 40% yield, 98.5:1.5 er). The enantiomeric purity was determined by SFC analysis on a Chiralpak AD column (10% IPA/CO<sub>2</sub>, 2.0 mL/min) with retention time 3.43 min (major) and 4.67 min (minor).

<sup>1</sup>H NMR (600 MHz, CDCl<sub>3</sub>) δ 7.20 (d, *J* = 8.2 Hz, 2H), 7.10 (dd, *J* = 8.2, 7.5 Hz, 1H), 6.38 (d, *J* = 16.2 Hz, 1H), 6.13 (dd, *J* = 16.2, 9.5 Hz, 1H), 4.08 (s, 2H), 2.97 (dd, *J* = 12.2, 5.6 Hz, 1H), 2.43 (dd, *J* = 12.2, 9.1 Hz, 1H), 1.76 – 1.66 (m, 1H), 1.51 – 1.43 (m, 1H), 1.12 (td, *J* = 8.2, 5.1 Hz, 1H), 0.60 – 0.51 (m, 1H).

<sup>13</sup>C NMR (150 MHz, CDCl<sub>3</sub>) δ 139.95, 135.97, 135.62, 128.95, 128.41, 114.18, 48.99, 48.36, 20.76, 20.48, 13.29.

HRMS (ESI-TOF) Calcd for C<sub>19</sub>H<sub>15</sub>F<sub>5</sub>Cl<sub>2</sub>N [M+H]: 422.0502; found: 422.0500.

The absolute stereochemistry was assigned by analogy to compound **3t'**.

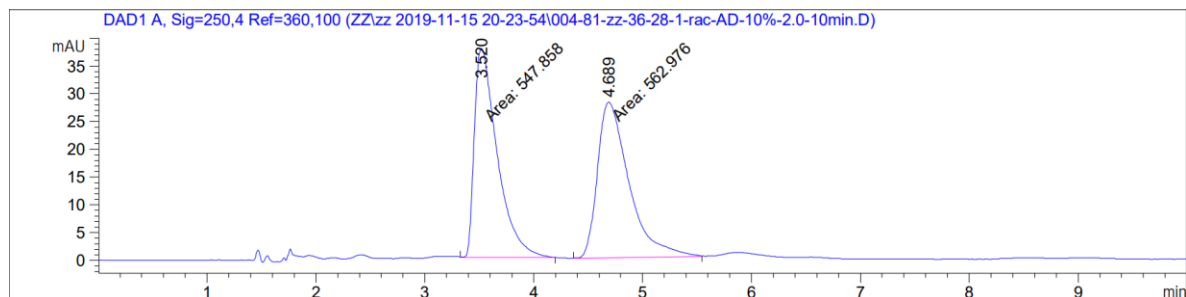

| Peak # | RetTime [min] | Type | Width [min] | Area [mAU*s] | Height [mAU] | Area %  |
|--------|---------------|------|-------------|--------------|--------------|---------|
| 1      | 3.520         | MM   | 0.2426      | 547.85809    | 37.63811     | 49.3195 |
| 2      | 4.689         | MM   | 0.3349      | 562.97565    | 28.01604     | 50.6805 |

Totals : 1110.83374 65.65416

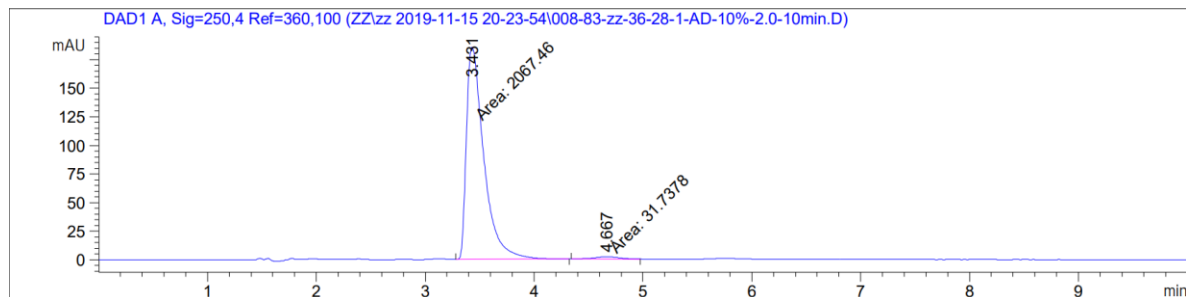

| Peak # | RetTime [min] | Type | Width [min] | Area [mAU*s] | Height [mAU] | Area %  |
|--------|---------------|------|-------------|--------------|--------------|---------|
| 1      | 3.431         | MM   | 0.1856      | 2067.46191   | 185.65993    | 98.4881 |
| 2      | 4.667         | MM   | 0.2769      | 31.73776     | 1.91005      | 1.5119  |

Totals : 2099.19968 187.56998

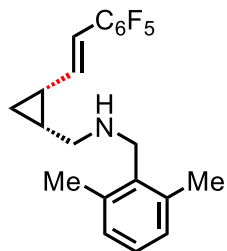

***N*-(2,6-Dimethylbenzyl)-1-((1*R*,2*R*)-2-((*E*)-2-(perfluorophenyl)vinyl)cyclopropyl)methanamine (6e)**

Following **General Procedure C** on 0.1 mmol scale. Purification by pTLC (hexane/EA) afforded the title compound (colorless oil, 11.5 mg, 30% yield, 98.5:1.5 er). The enantiomeric purity was determined by SFC analysis on a Chiralpak AD column (30% IPA/CO<sub>2</sub>, 2.0 mL/min) with retention time 2.55 min (major) and 5.54 min (minor).

<sup>1</sup>H NMR (600 MHz, CDCl<sub>3</sub>) δ 7.05 – 6.98 (m, 1H), 6.95 (d, *J* = 7.5 Hz, 2H), 6.39 (d, *J* = 16.1 Hz, 1H), 6.26 (dd, *J* = 16.1, 9.5 Hz, 1H), 3.79 (d, *J* = 12.0 Hz, 1H), 3.75 (d, *J* = 12.0 Hz, 1H), 2.97 (dd, *J* = 12.3, 5.9 Hz, 1H), 2.59 (dd, *J* = 12.3, 8.7 Hz, 1H), 2.32 (s, 6H), 1.78 – 1.69 (m, 1H), 1.52 – 1.45 (m, 1H), 1.14 (td, *J* = 8.2, 4.9 Hz, 1H), 0.64 – 0.57 (m, 1H).

<sup>13</sup>C NMR (150 MHz, CDCl<sub>3</sub>) δ 140.40, 136.95, 136.54, 128.34, 127.11, 113.97, 50.22, 47.74, 20.82, 20.70, 19.53, 13.41.

HRMS (ESI-TOF) Calcd for C<sub>21</sub>H<sub>21</sub>F<sub>5</sub>N [M+H]: 382.1594; found: 382.1593.

The absolute stereochemistry was assigned by analogy to compound **3t'**.

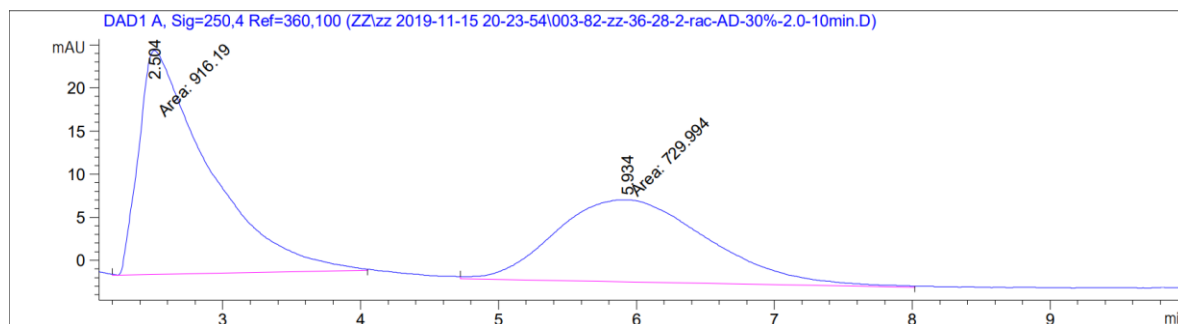

| Peak # | RetTime [min] | Type | Width [min] | Area [mAU*s] | Height [mAU] | Area %  |
|--------|---------------|------|-------------|--------------|--------------|---------|
| 1      | 2.504         | MM   | 0.5875      | 916.18994    | 25.99087     | 55.6554 |
| 2      | 5.934         | MM   | 1.2806      | 729.99353    | 9.50046      | 44.3446 |

Totals : 1646.18347 35.49133

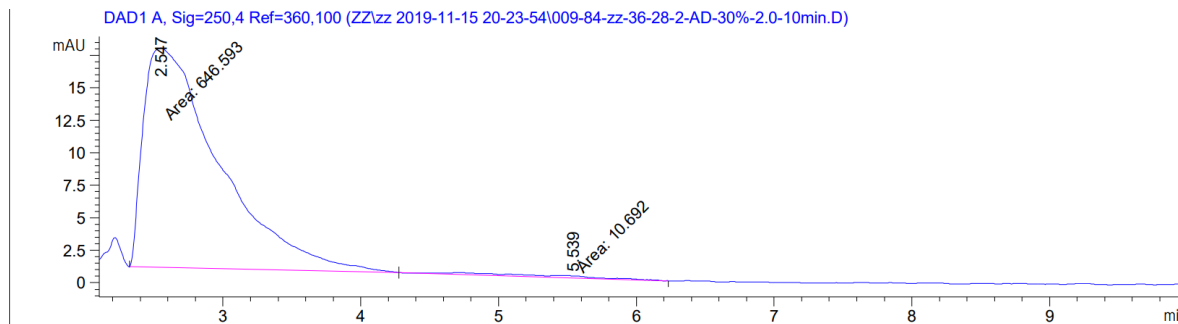

| Peak # | RetTime [min] | Type | Width [min] | Area [mAU*s] | Height [mAU] | Area %  |
|--------|---------------|------|-------------|--------------|--------------|---------|
| 1      | 2.547         | MM   | 0.6383      | 646.59314    | 16.88287     | 98.3733 |
| 2      | 5.539         | MM   | 1.0567      | 10.69198     | 1.68634e-1   | 1.6267  |

Totals : 657.28512 17.05150



## Reference:

1. Chan, K. S. L.; Fu, H.-Y.; Yu, J.-Q. Palladium(II)-catalyzed highly enantioselective C–H arylation of cyclopropylmethyamines. *J. Am. Chem. Soc.* **2015**, *137*, 2042–2046.
2. Ye, L.; Tian, Y.; Meng, X.; Gu, Q.-S.; Liu, X.-Y. Enantioselective copper(I)/chiral phosphoric acid catalysed intramolecular amination of allylic and benzylic C–H bonds. *Angew. Chem. Int. Ed.* **2020**, *59*, 1129–1133.
3. Wang, F.; Jeon, K. O.; Salovich, J. M.; Macdonald, J. D.; Alvarado, J.; Gogliotti, R. D.; Phan, J.; Olejniczak, E. T.; Sun, Q.; Wang, S.; Camper, D.; Yuh, J. P.; Shaw, J. G.; Sai, J.; Rossanese, O. W.; Tansey, W. P.; Stauffer, S. R.; Fesik, S. W. Discovery of potent 2-aryl-6,7-dihydro-5H-pyrrolo[1,2-*a*]imidazoles as WDR5-WIN-site inhibitors using fragment-based methods and structure-based design. *J. Med. Chem.* **2018**, *61*, 5623–5642.
4. Ishibashi, H.; Uegaki, M.; Sakai, M.; Takeda, Y. Base-promoted aminoethylation of thiols with 2-oxazolidinones: a simple synthesis of 2-aminoethyl sulfides. *Tetrahedron* **2001**, *57*, 2115–2120.
5. Zhuang, Z.; Yu, C.-B.; Chen, G.; Wu, Q.-F.; Hsiao, Y.; Joe, C. L.; Qiao, J. X.; Poss, M. A.; Yu, J.-Q. Ligand-enabled  $\beta$ -C(sp<sup>3</sup>)-H olefination of free carboxylic acids. *J. Am. Chem. Soc.* **2018**, *140*, 10363–10367.
6. Heydari, A.; Khaksar, S.; Tajbakhsh, M. 1,1,1,3,3,3-Hexafluoroisopropanol: a recyclable organocatalyst for *N*-Boc protection of amines. *Synthesis* **2008**, 3126–3130.
7. Takeshima, A.; Kano, T.; Maruoka, K. Synthesis of phenylcyclopropane-based secondary amine catalysts and their applications in enamine catalysis. *Org. Lett.* **2019**, *21*, 8071–8074.

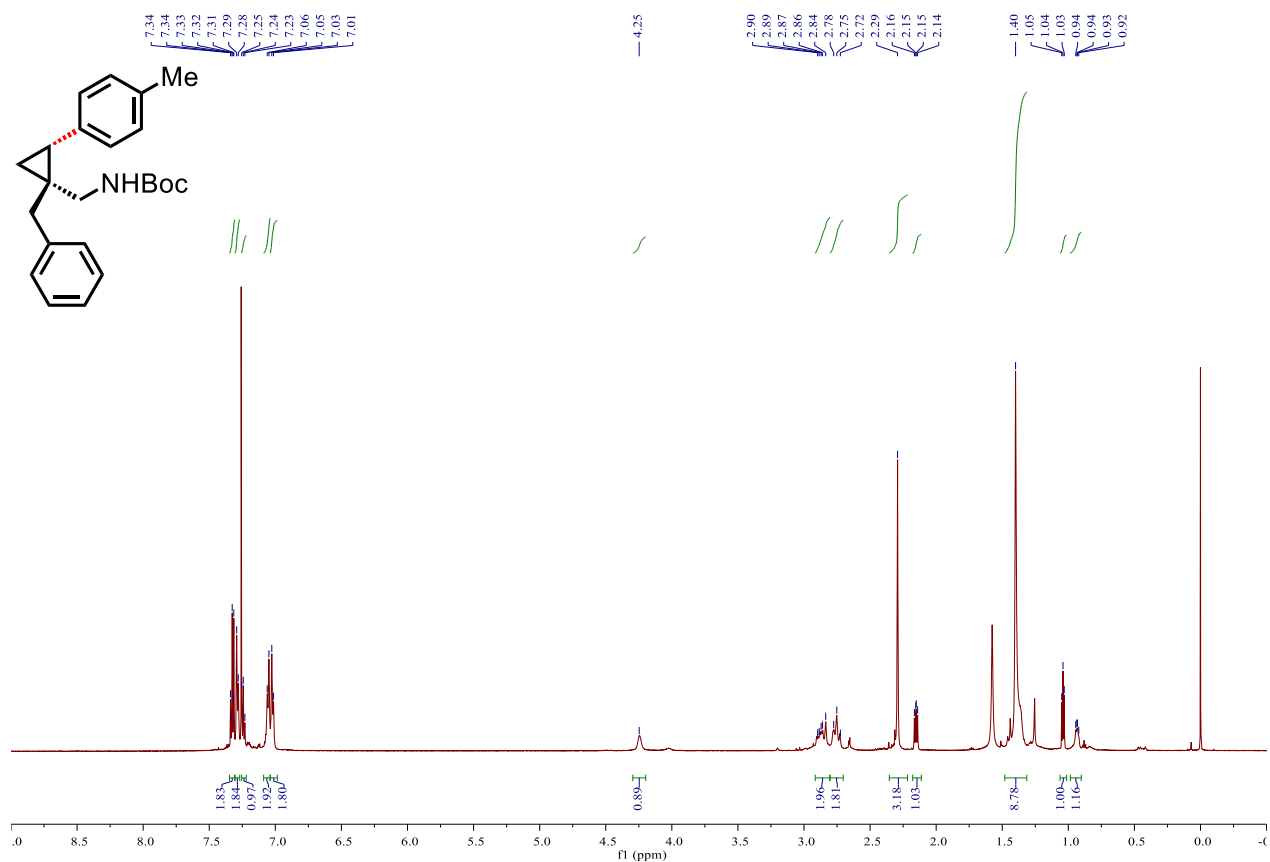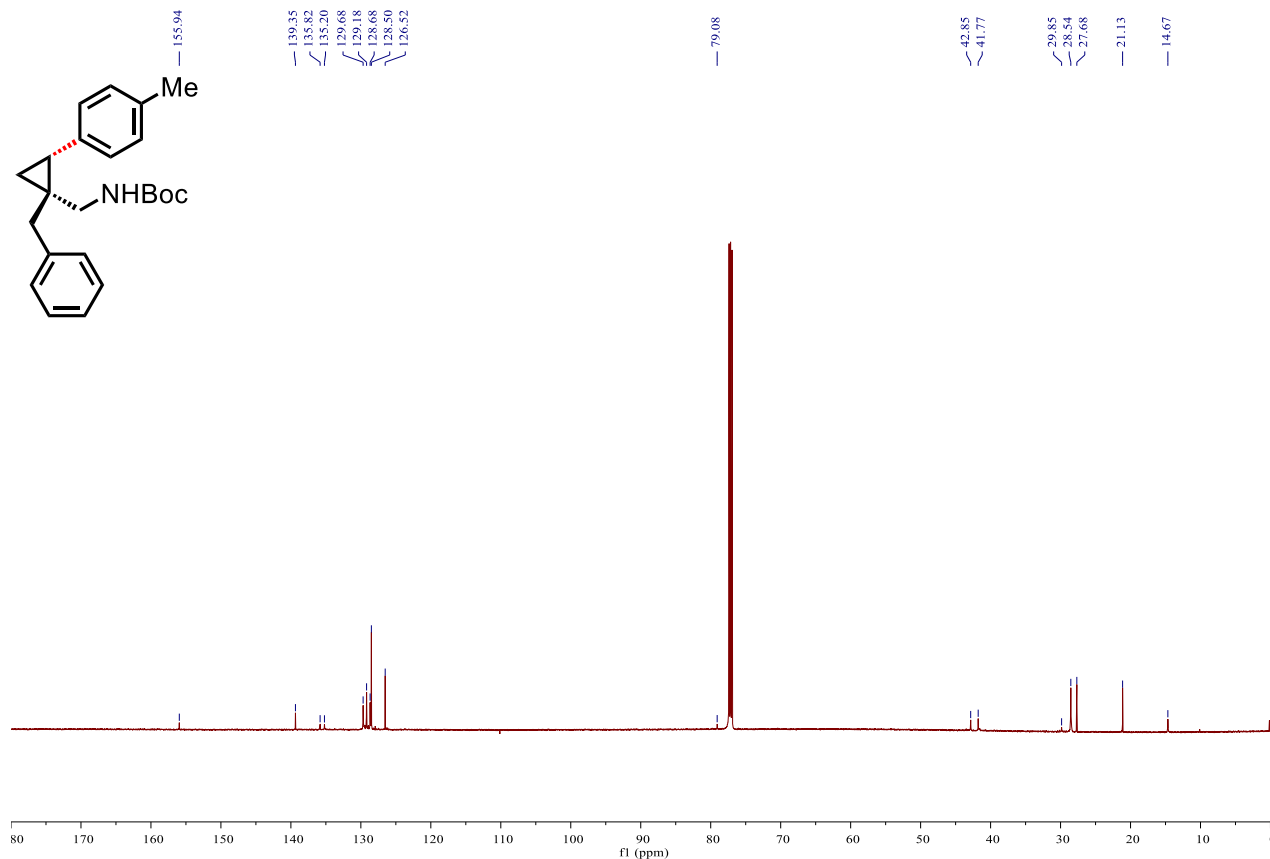

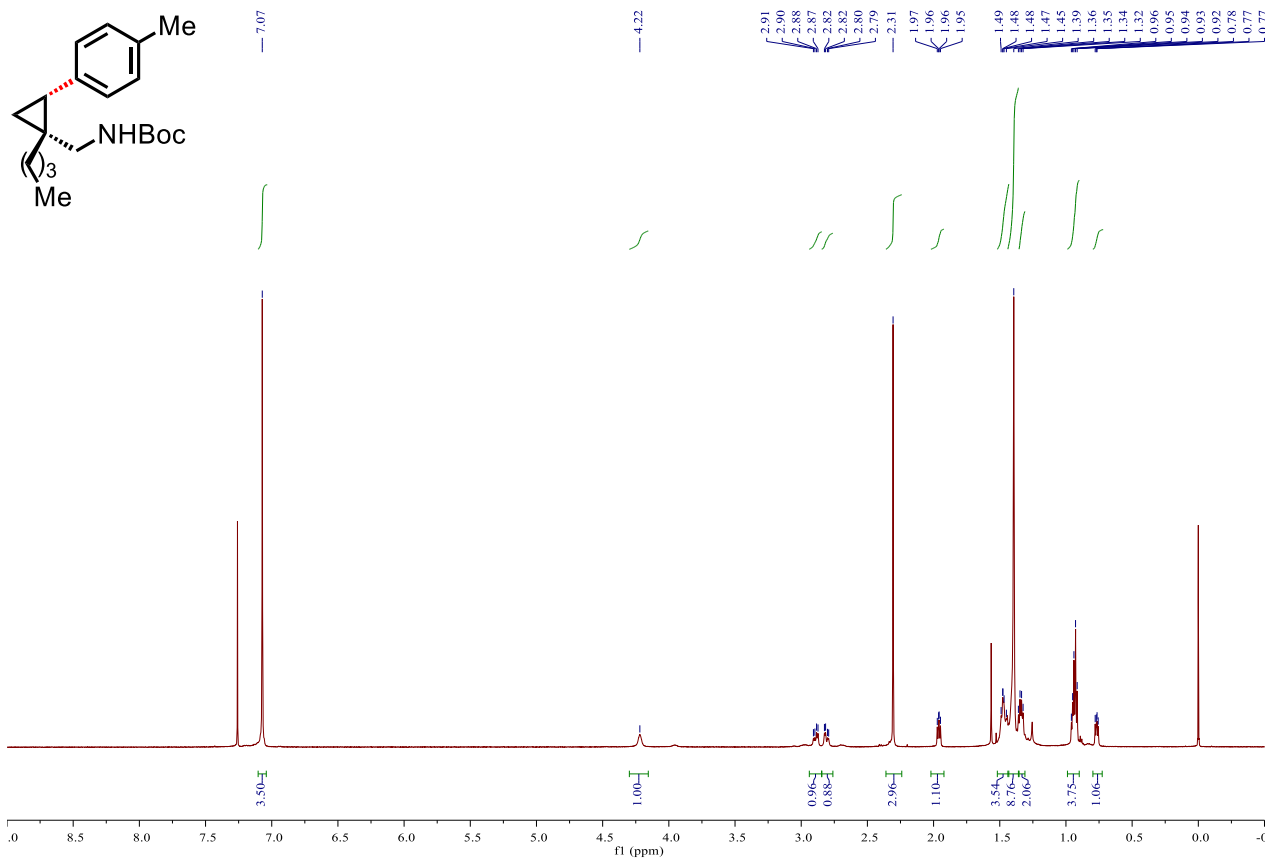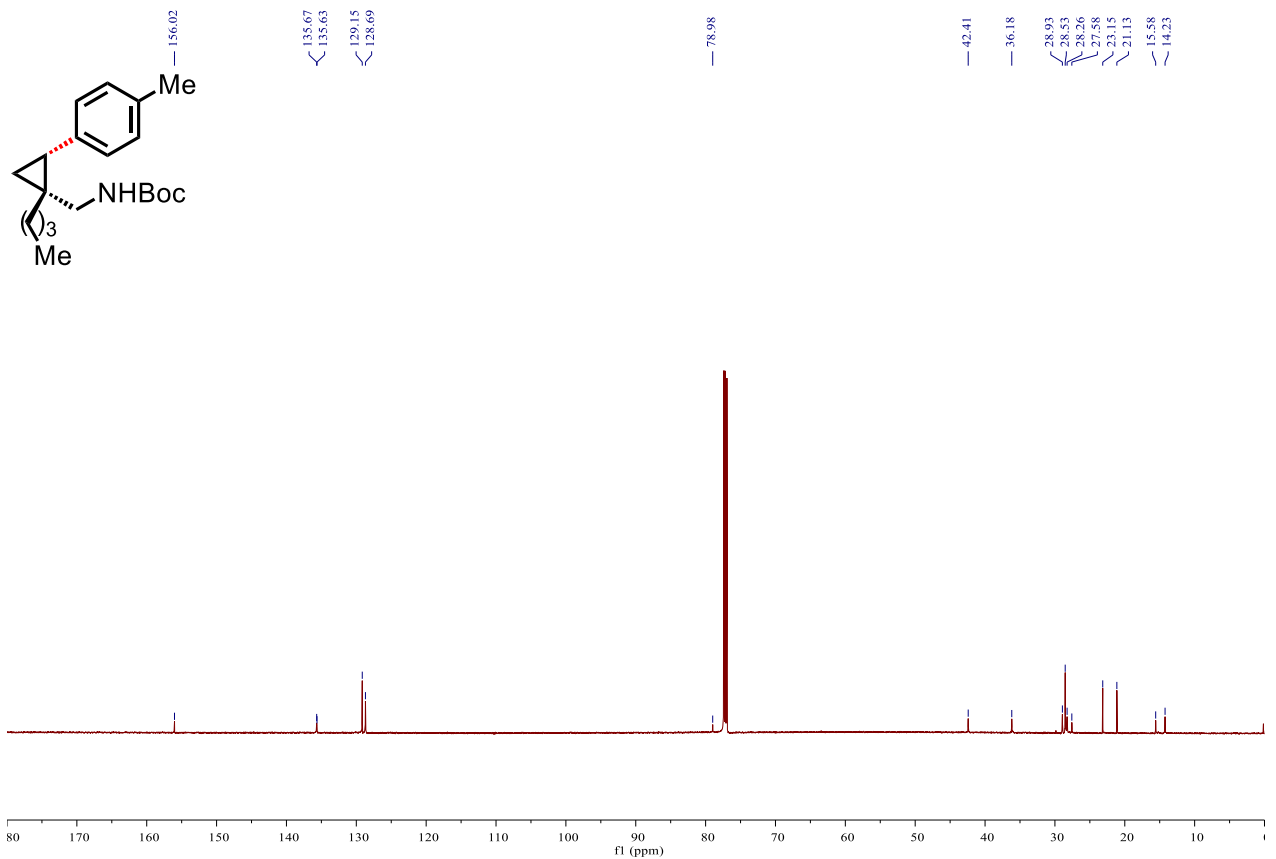

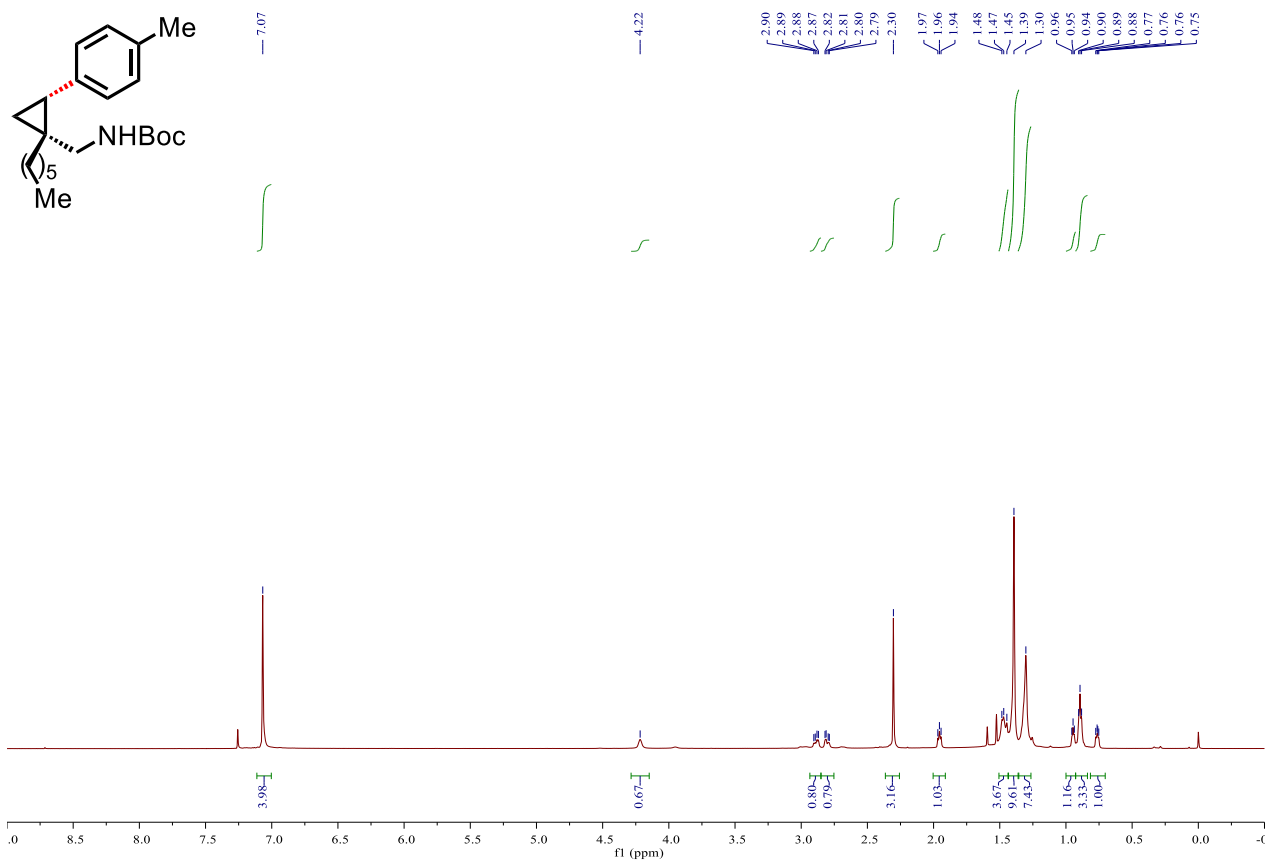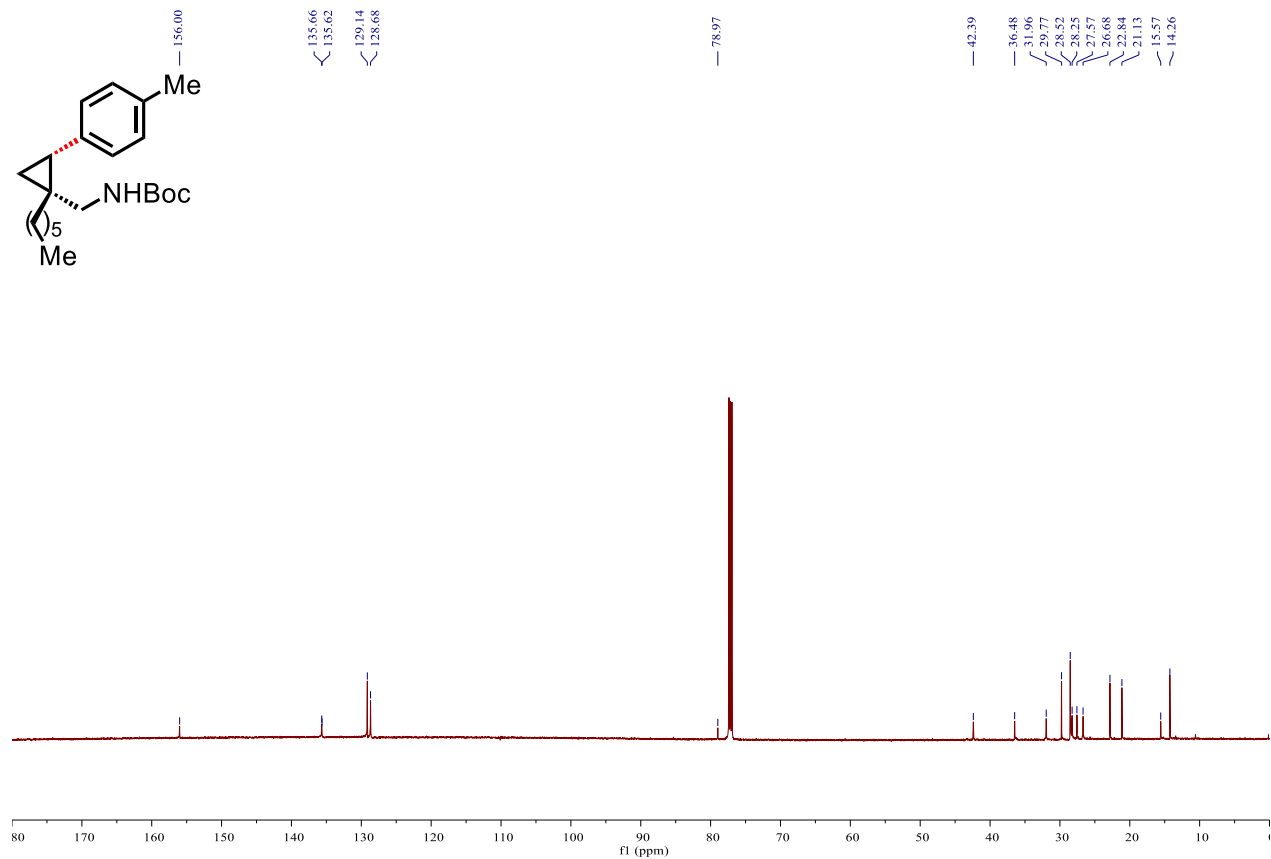

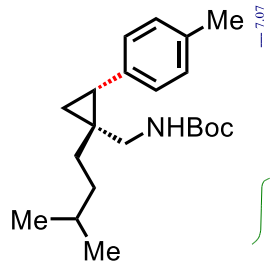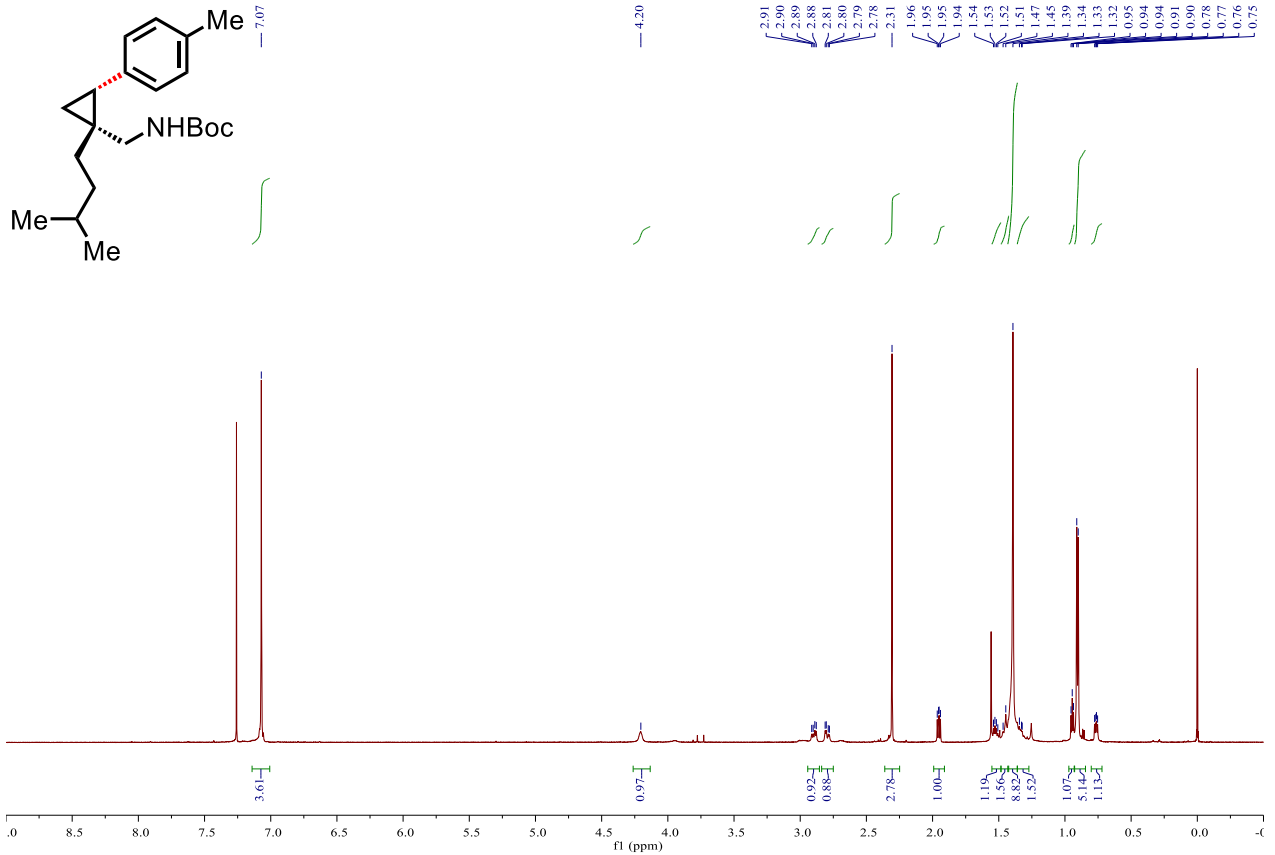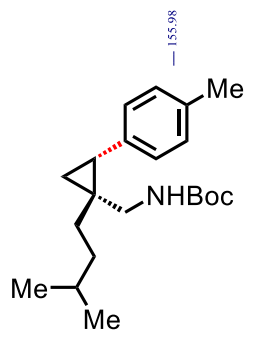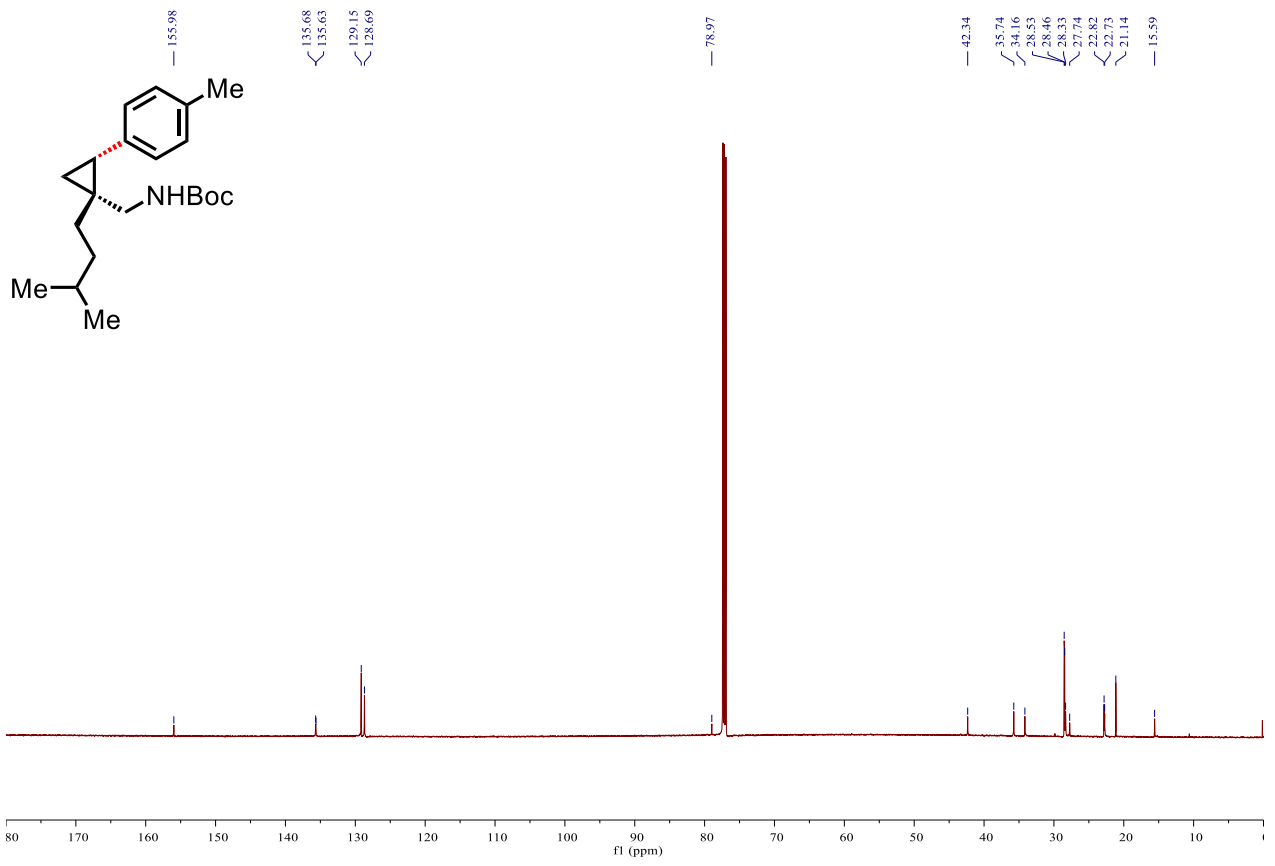

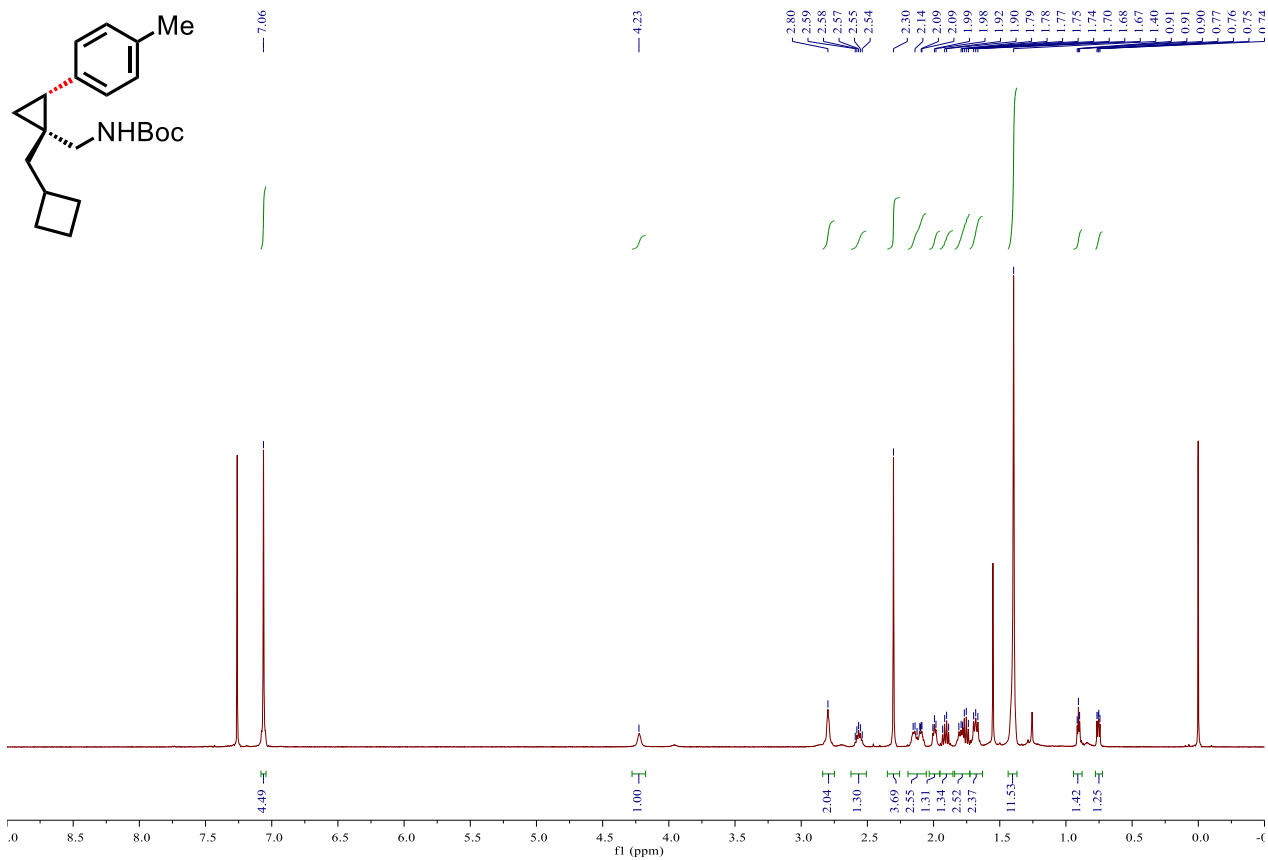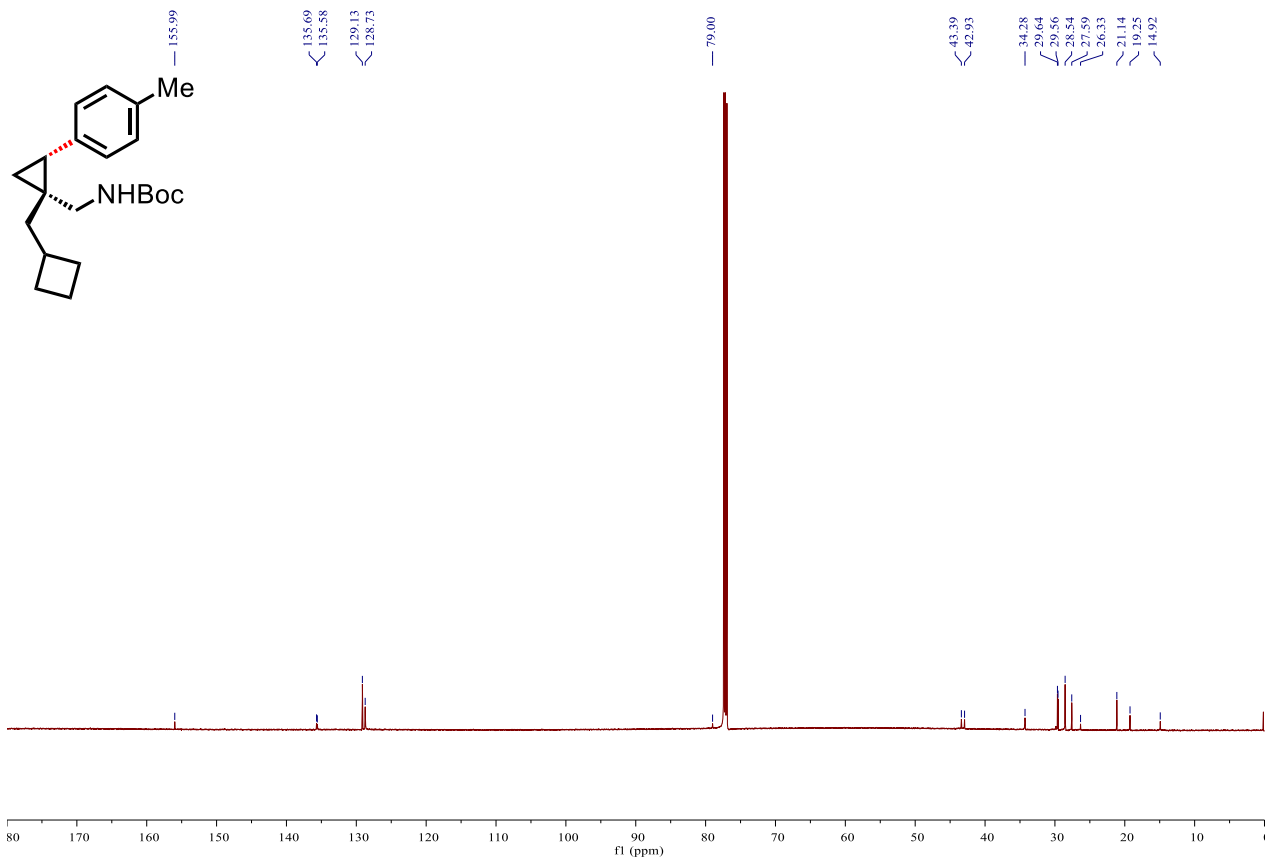

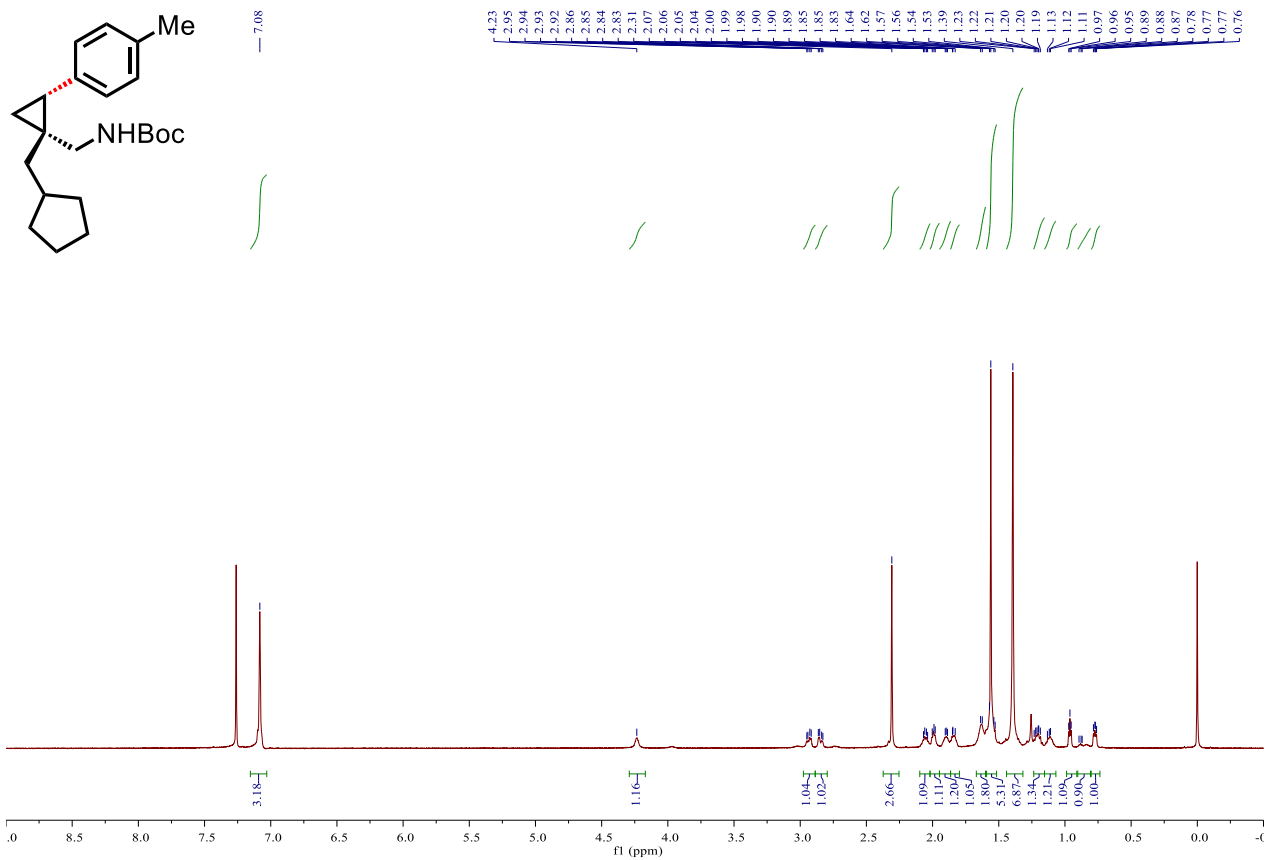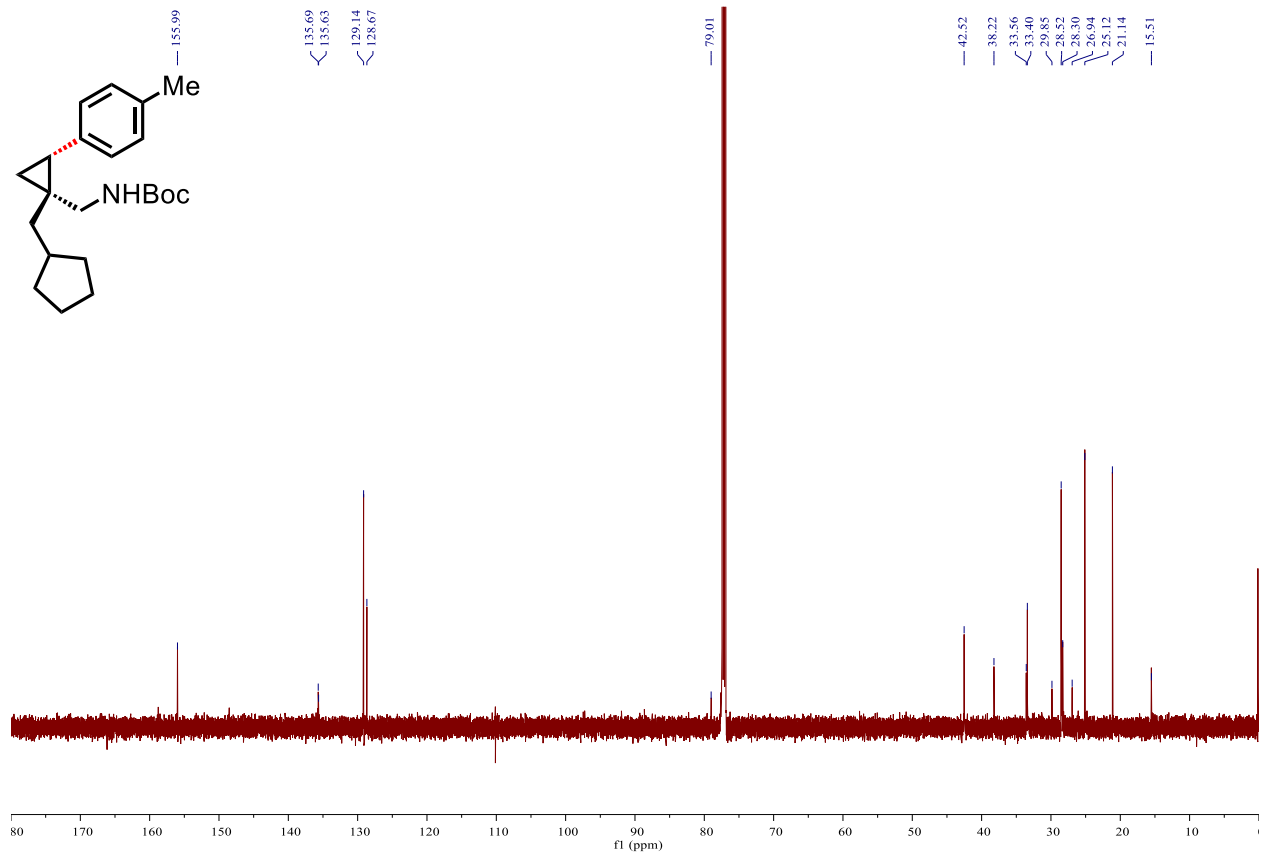

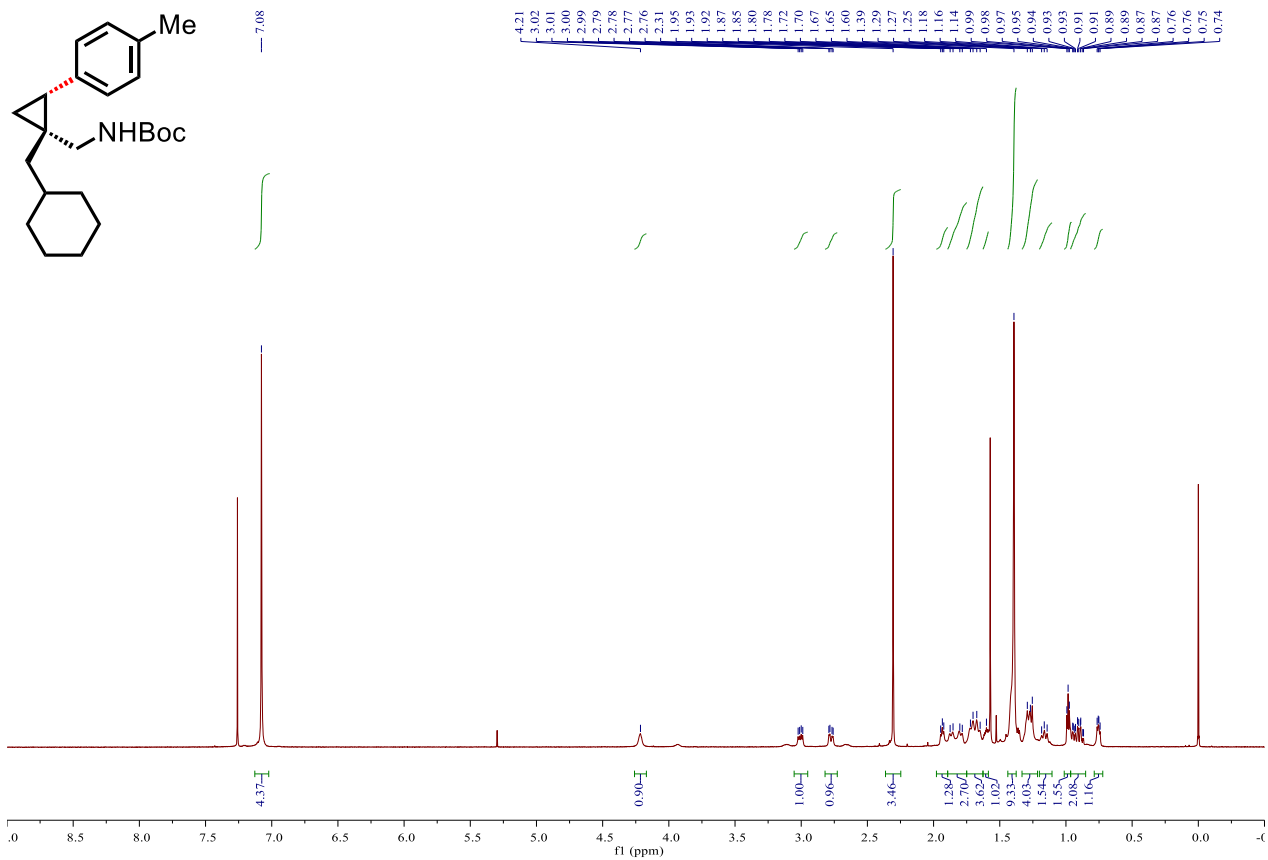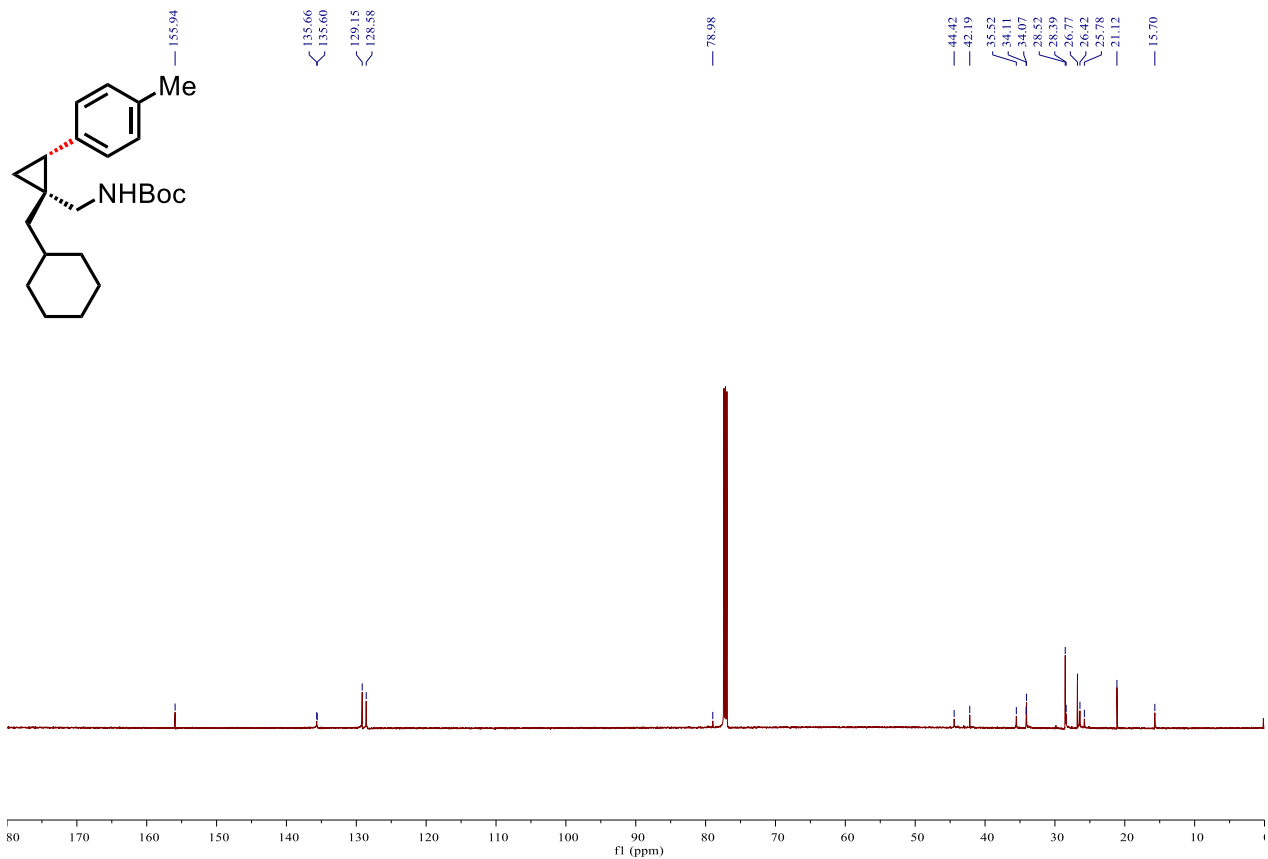



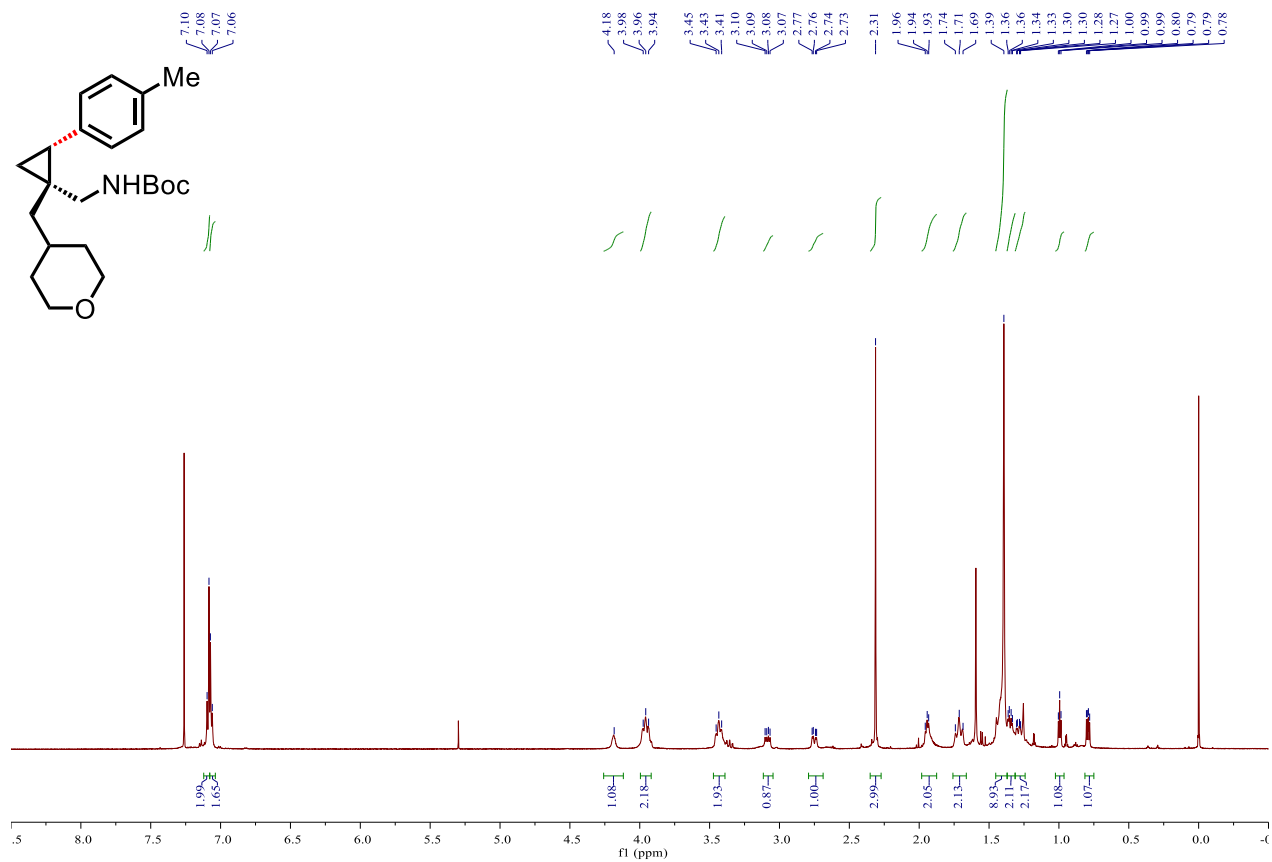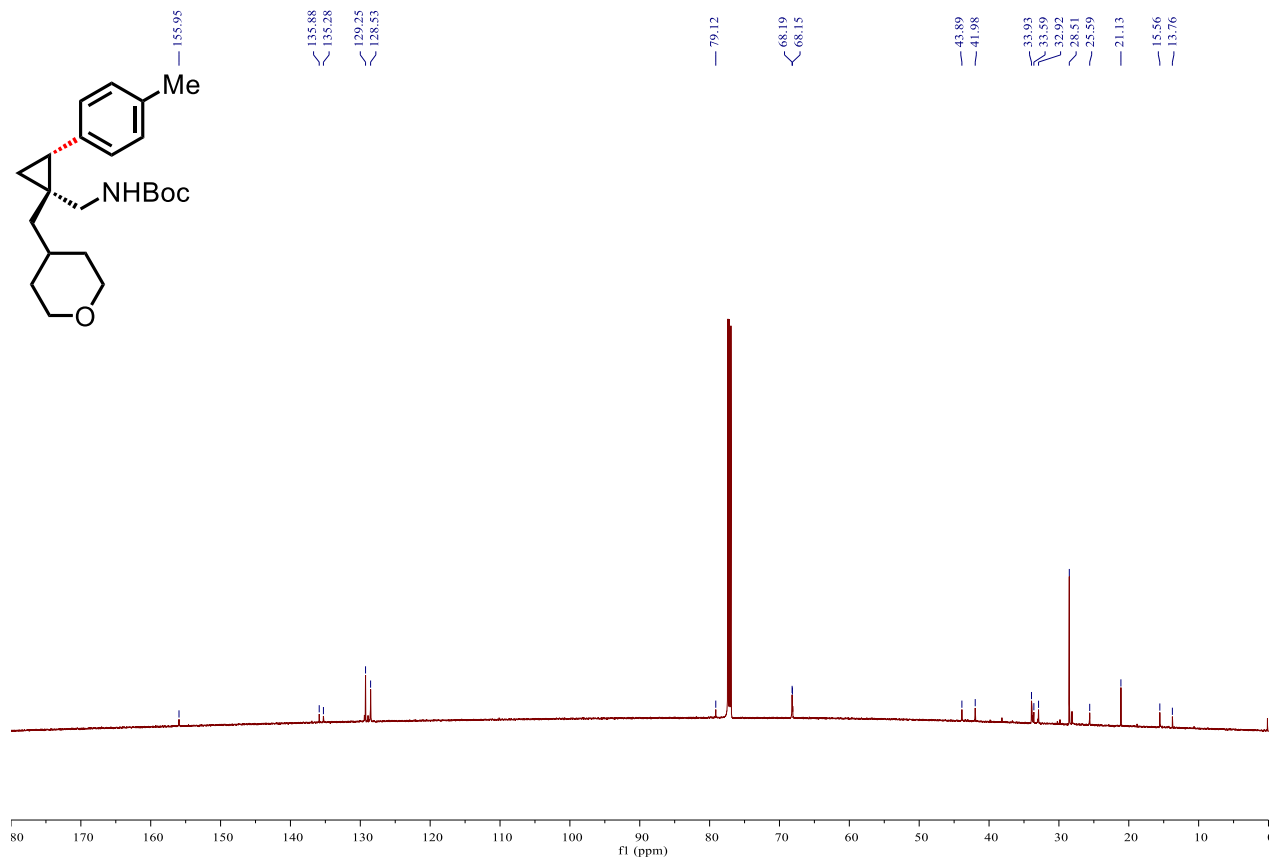

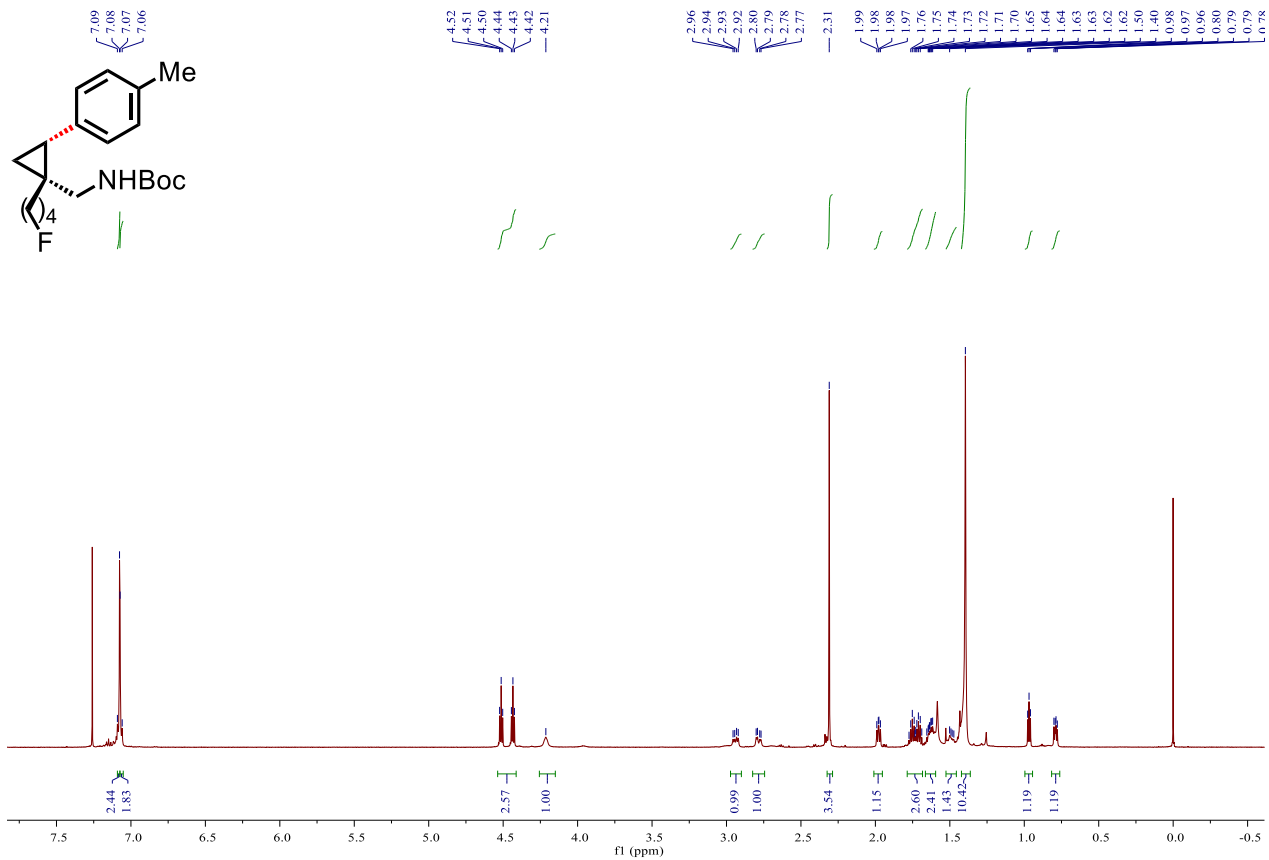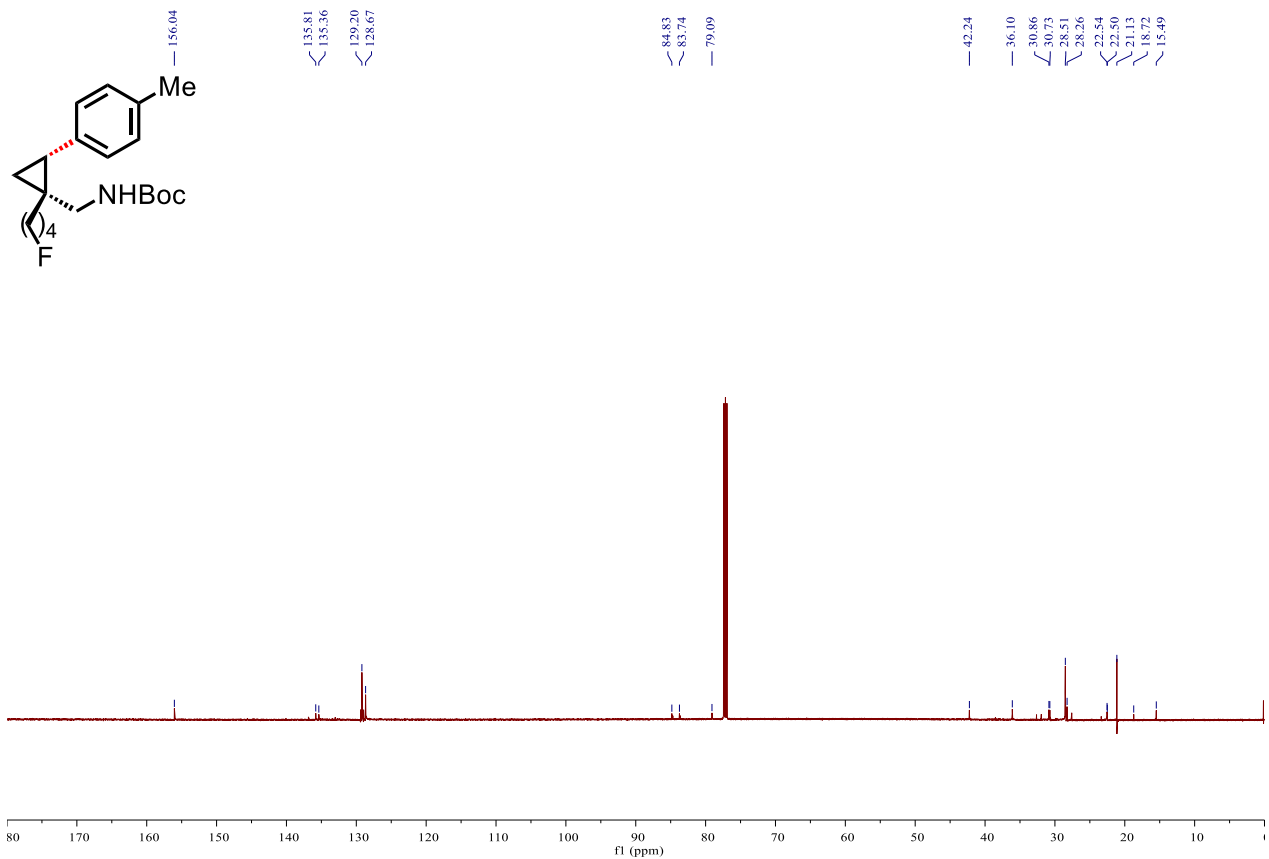

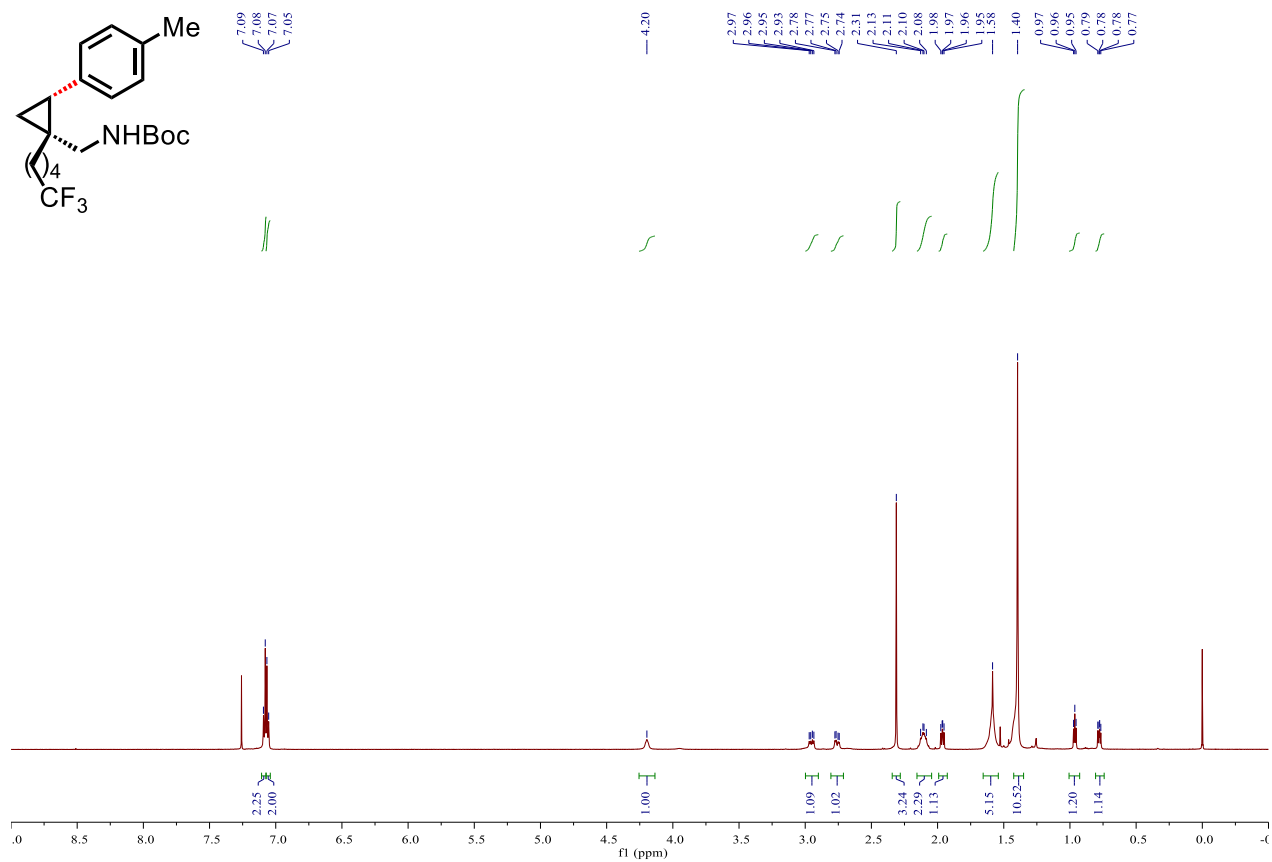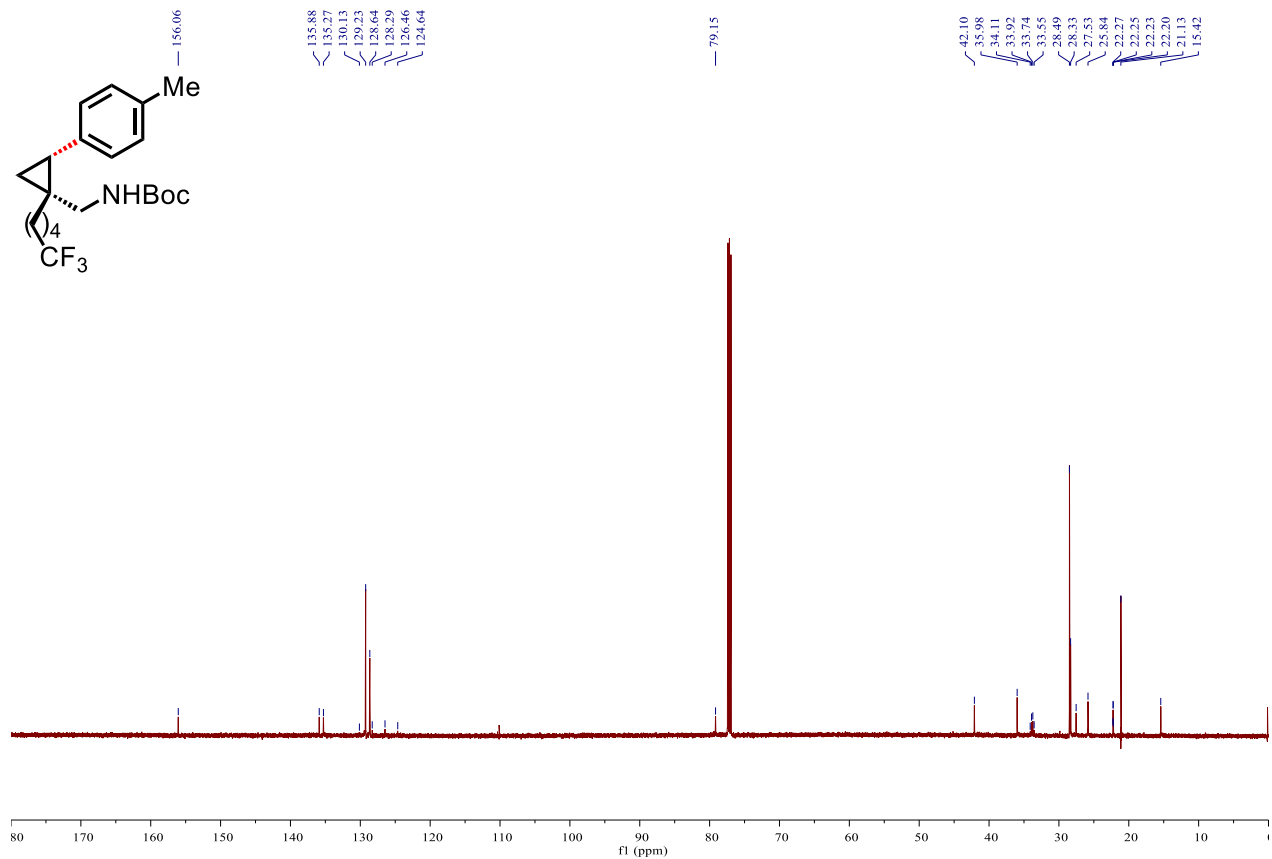

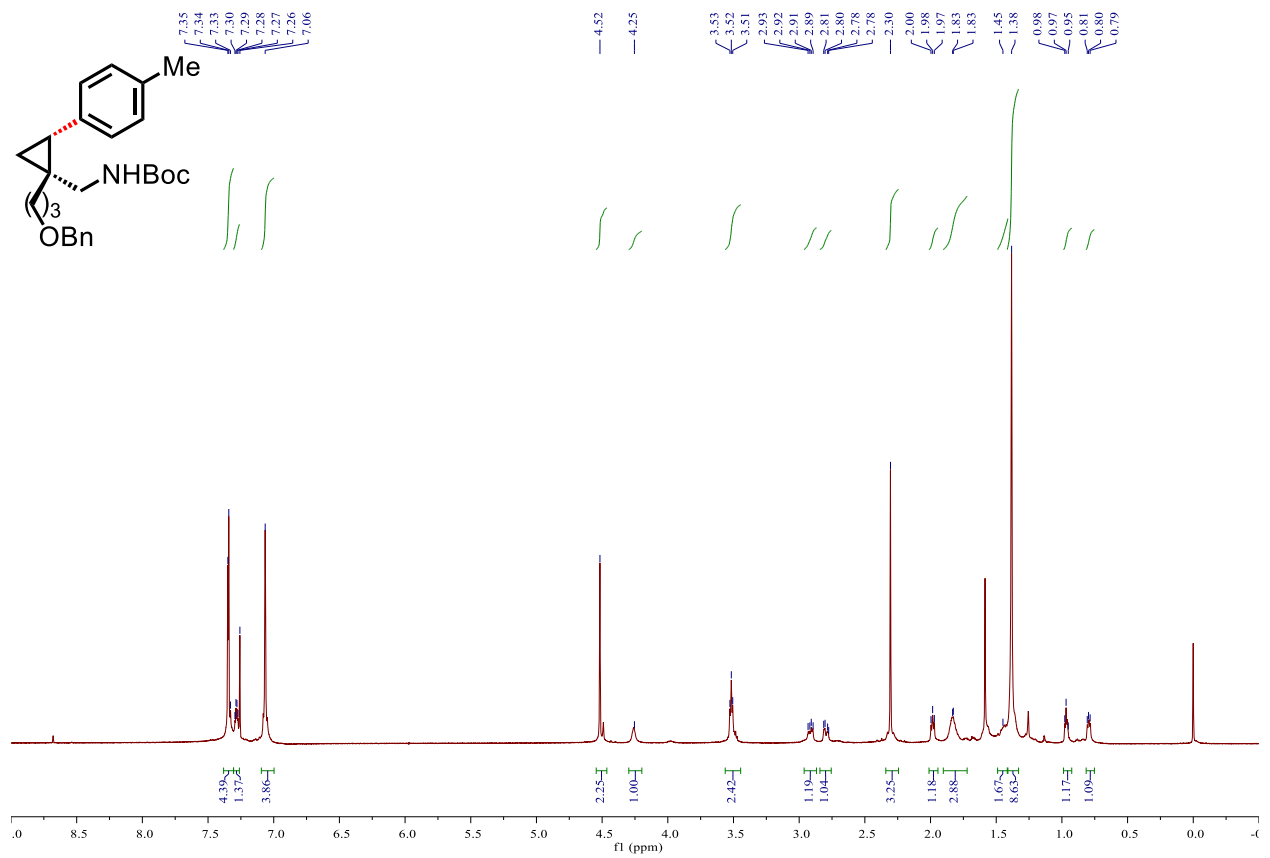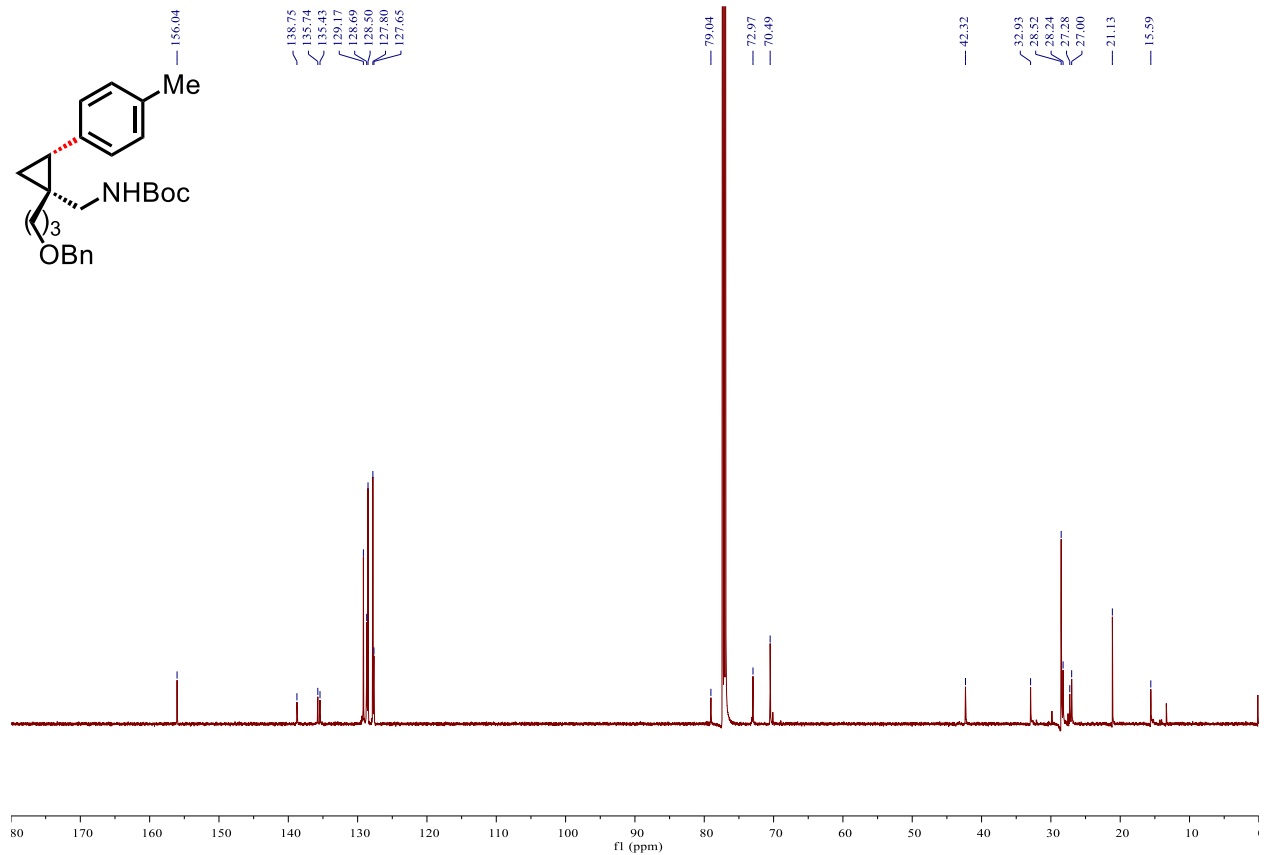

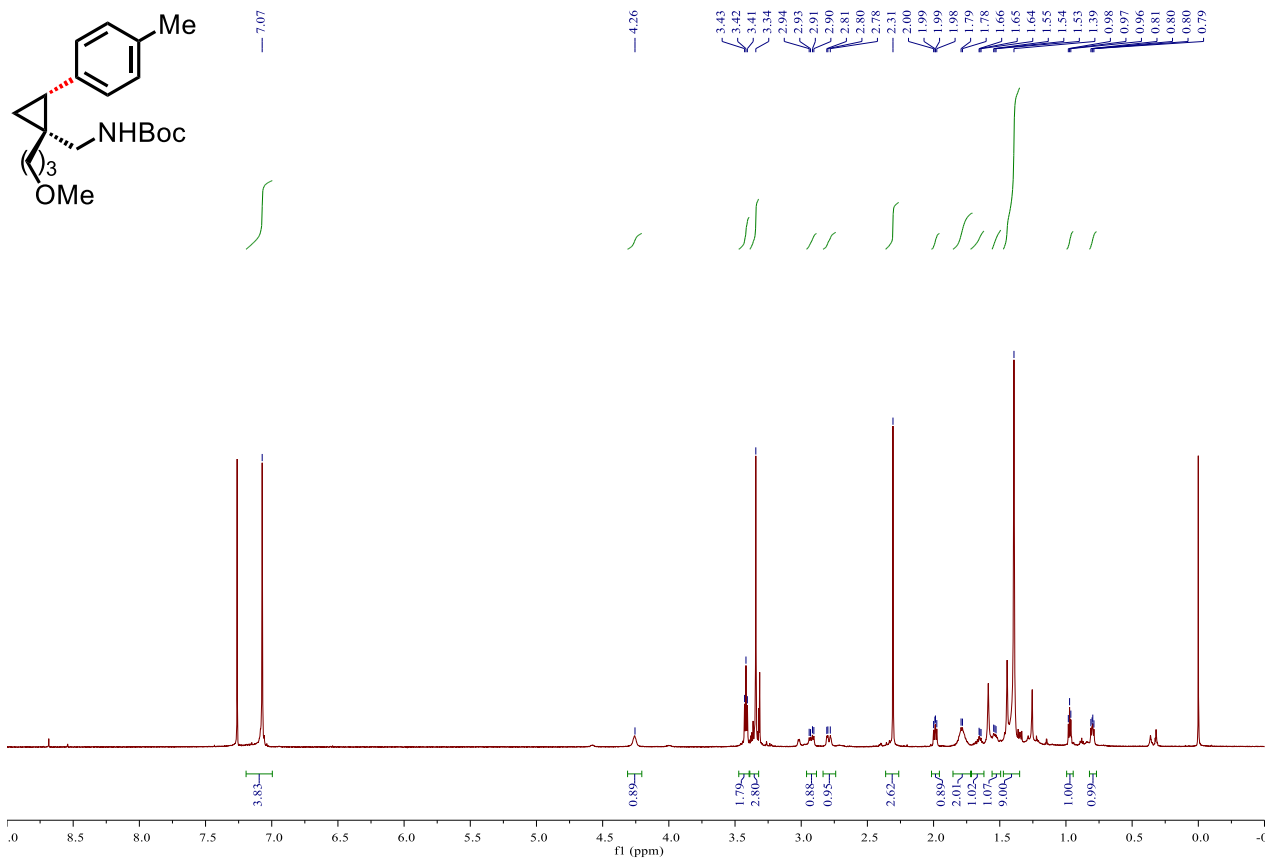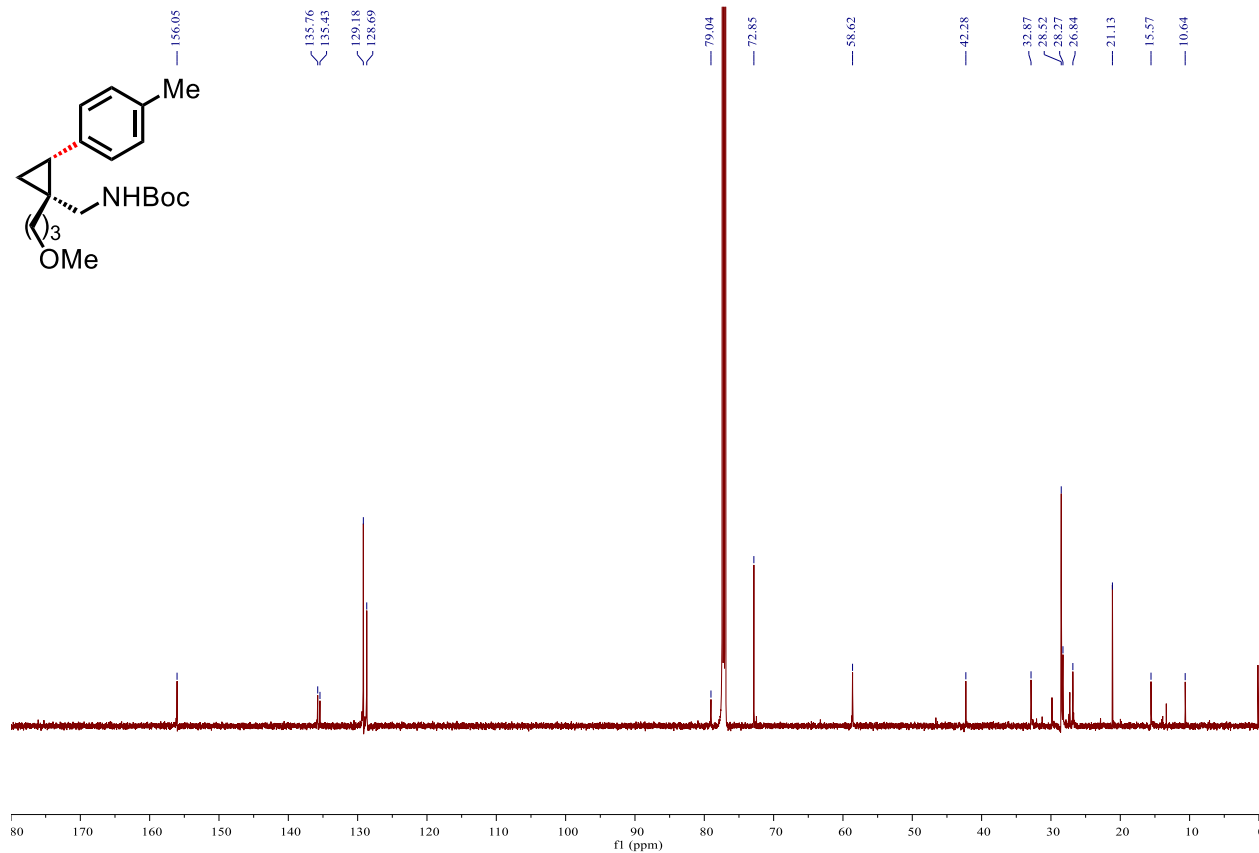

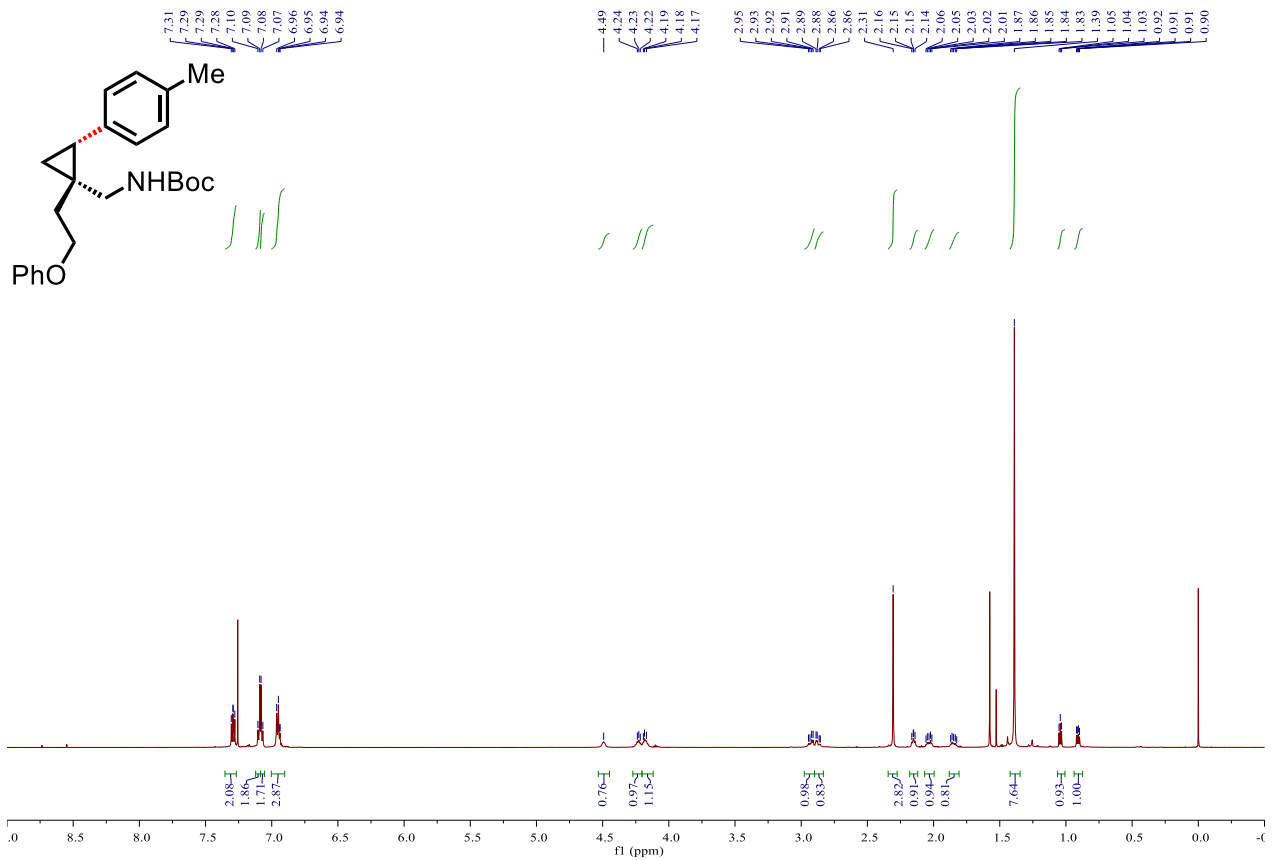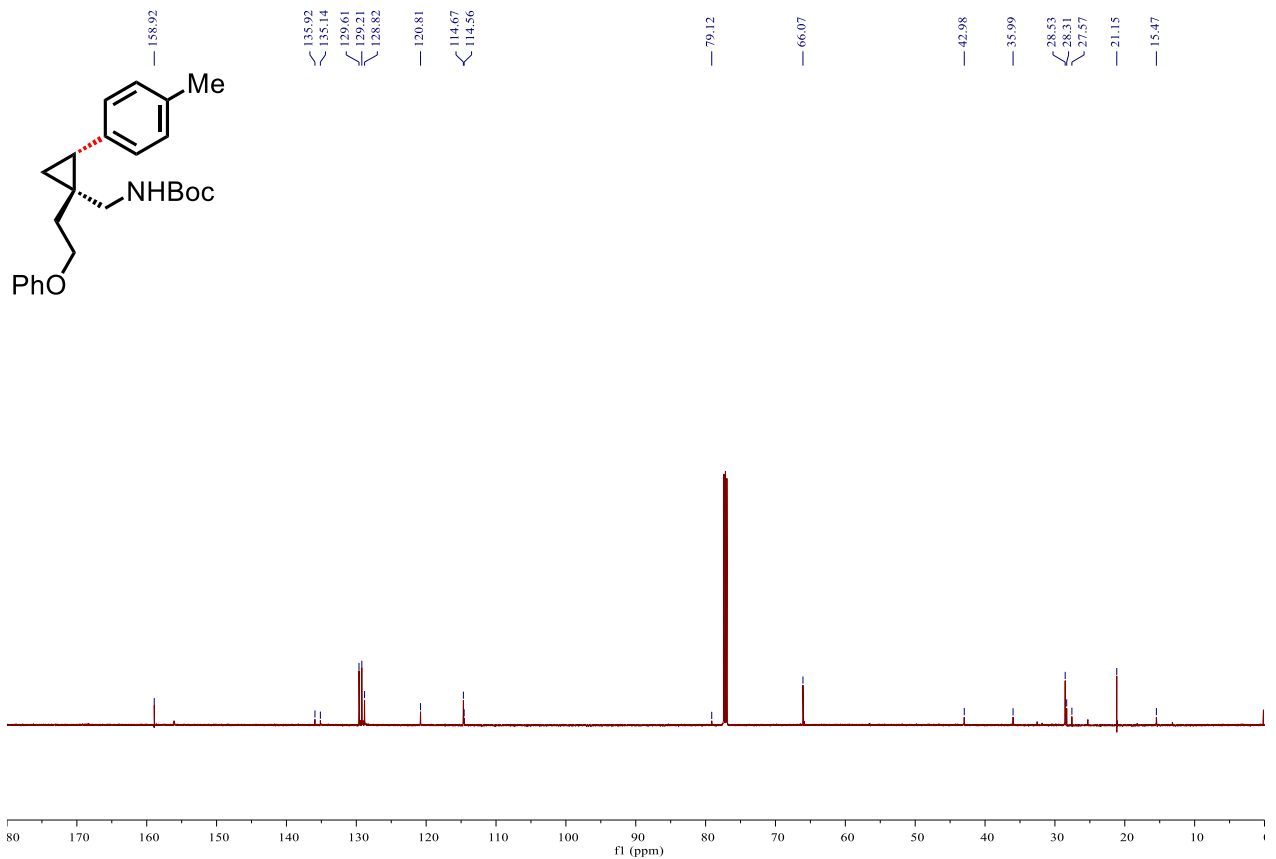

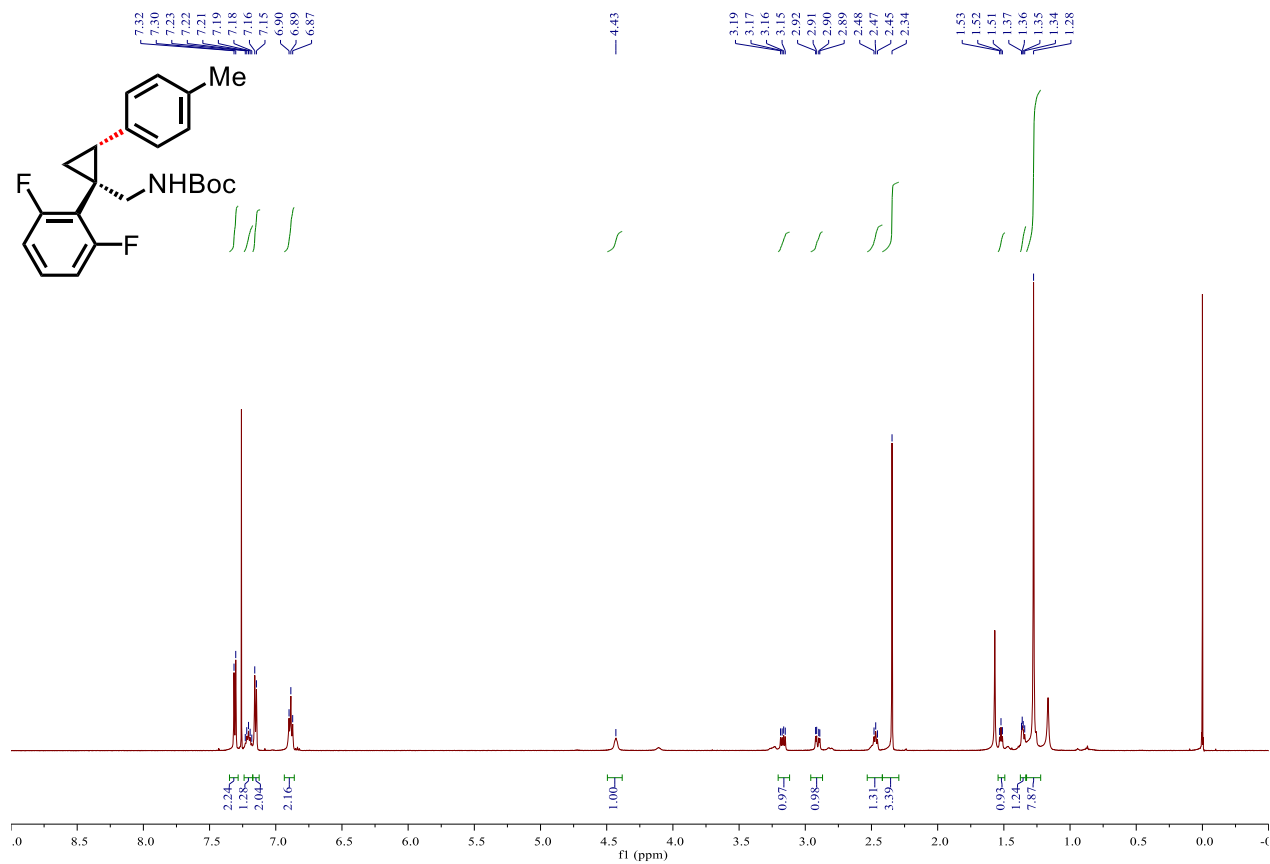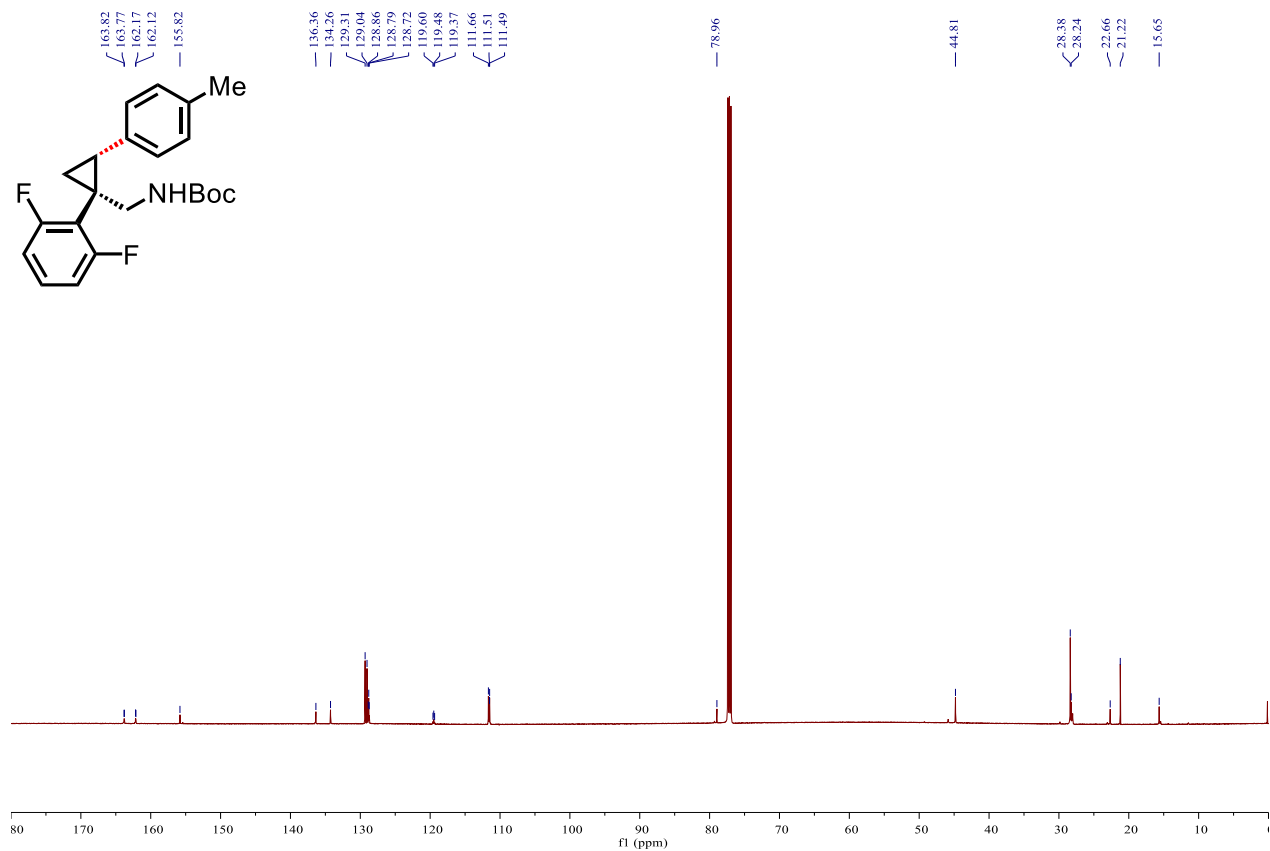

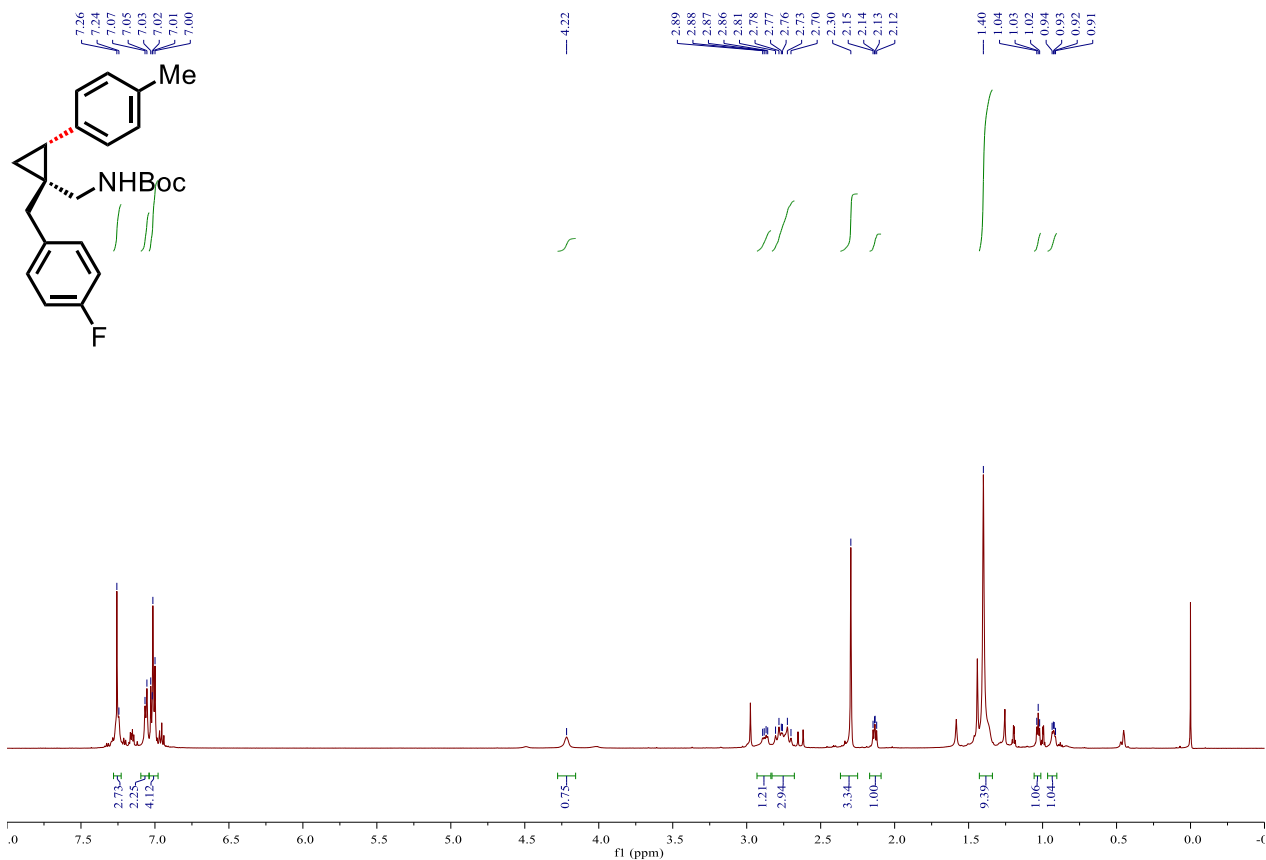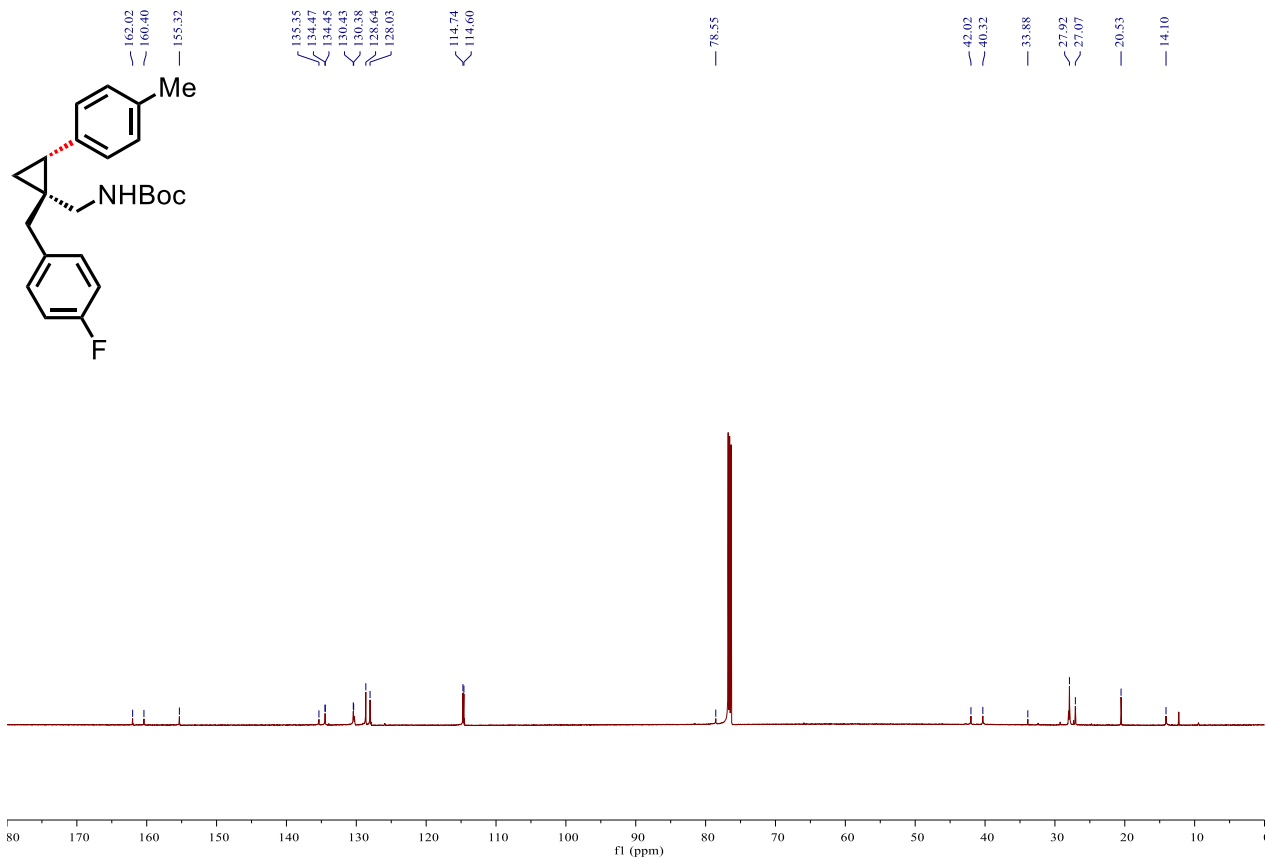



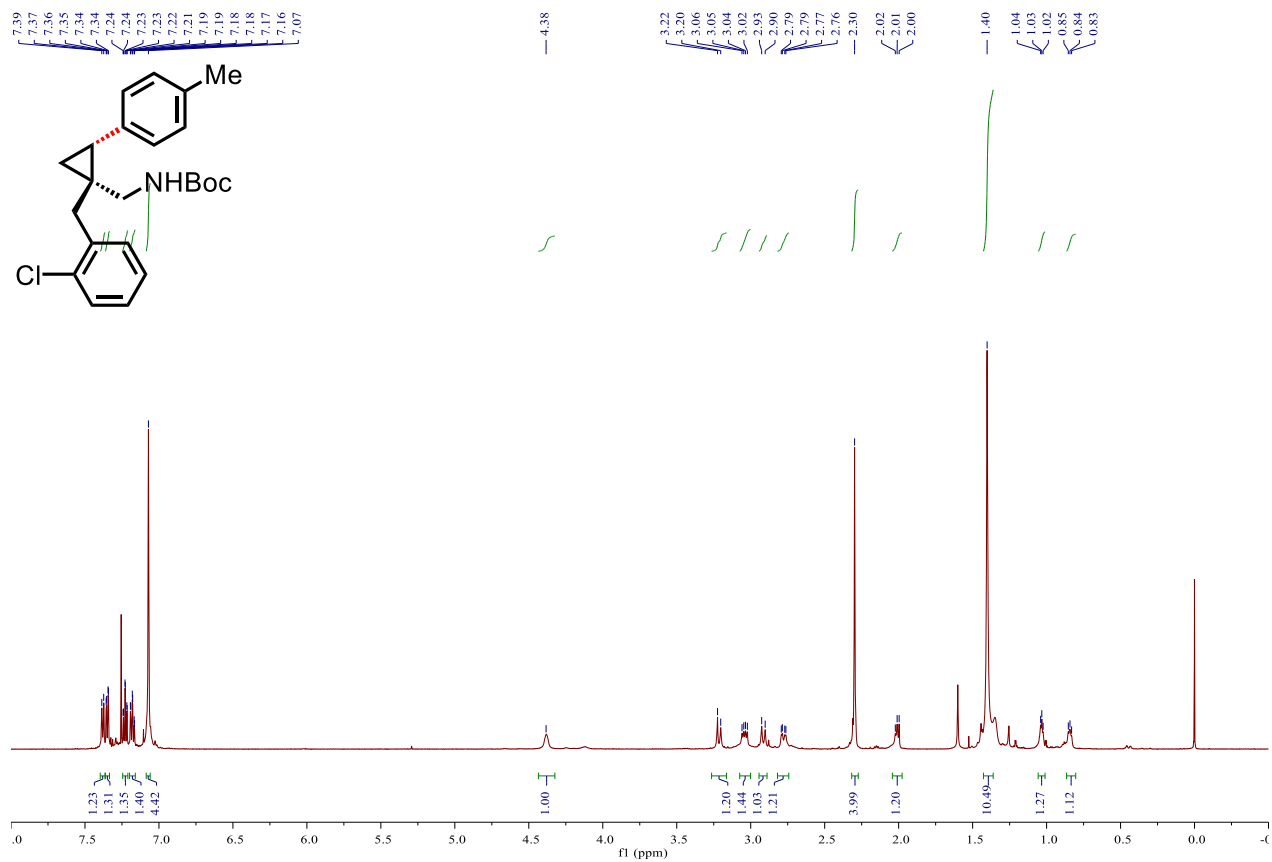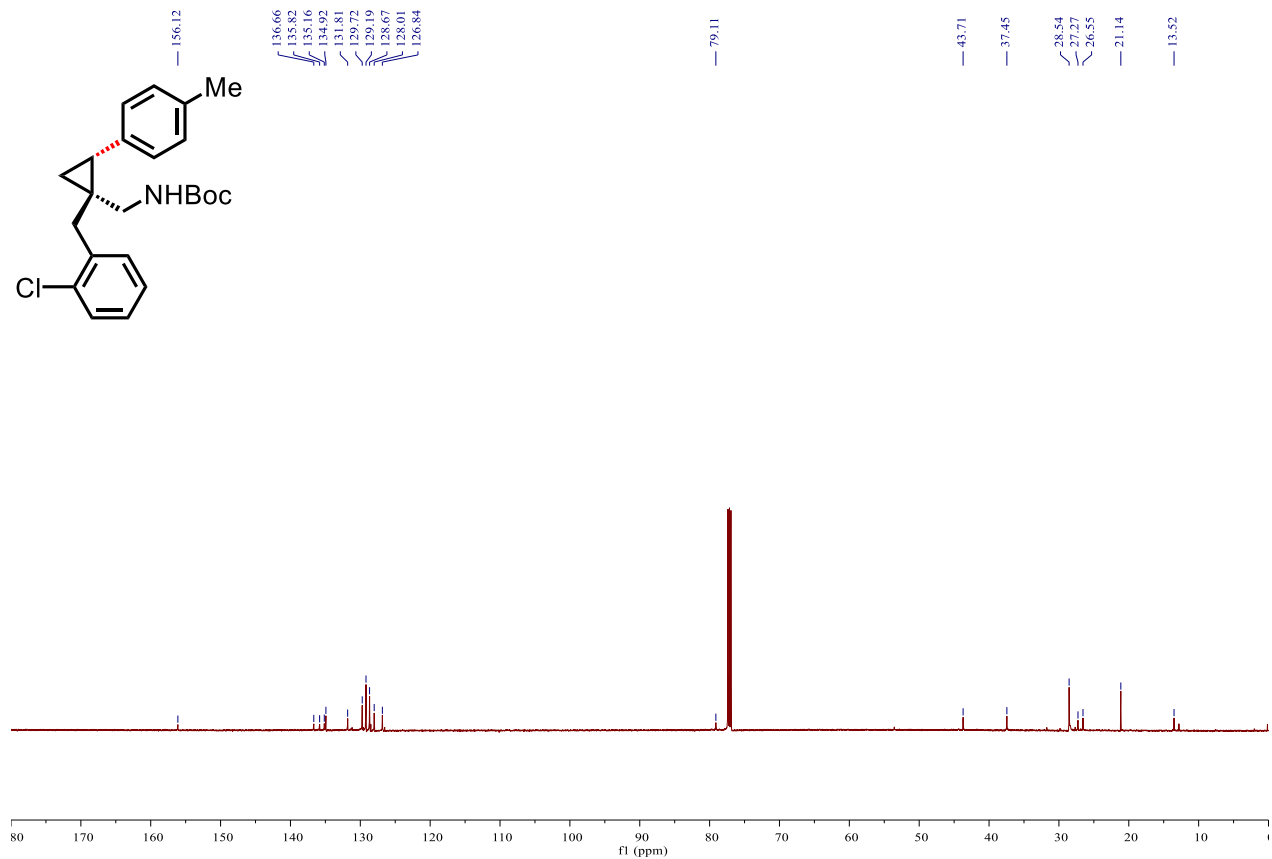

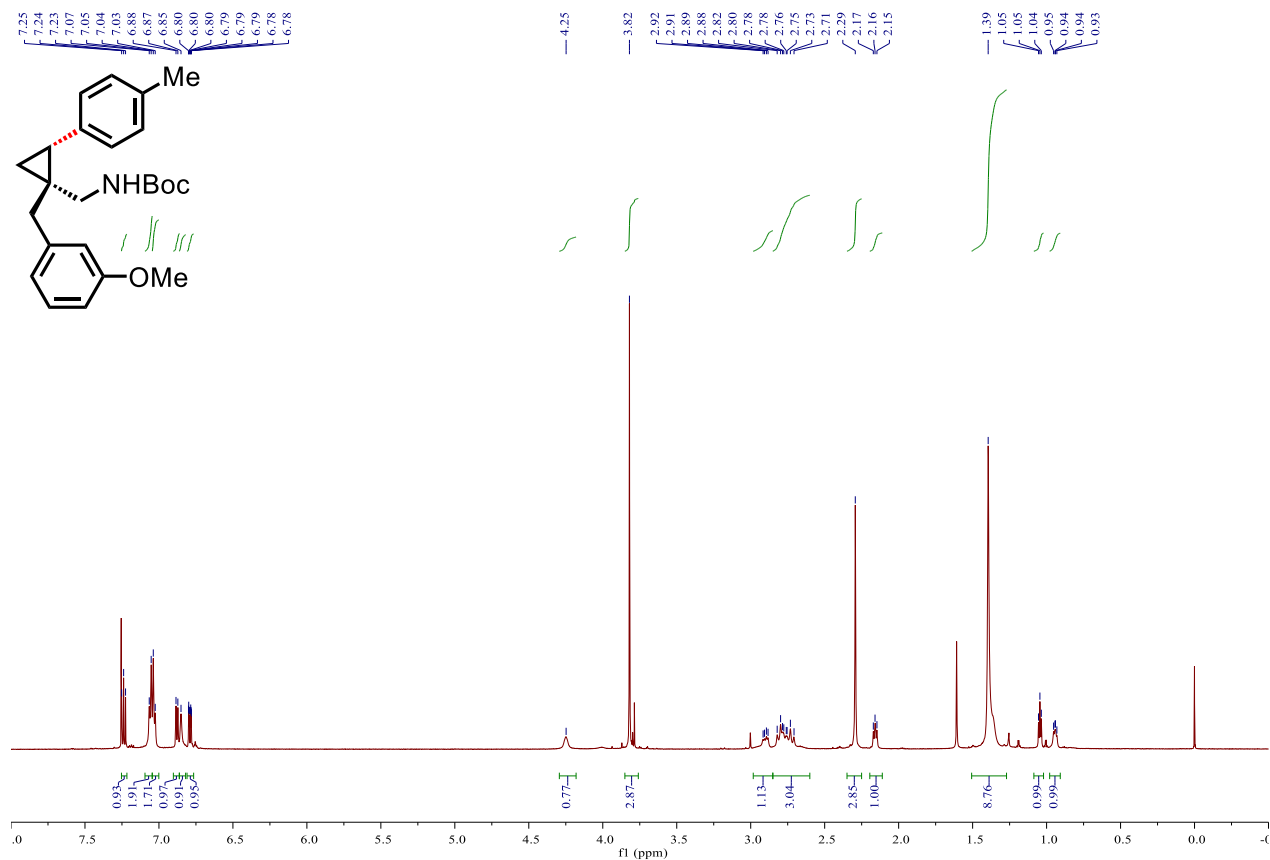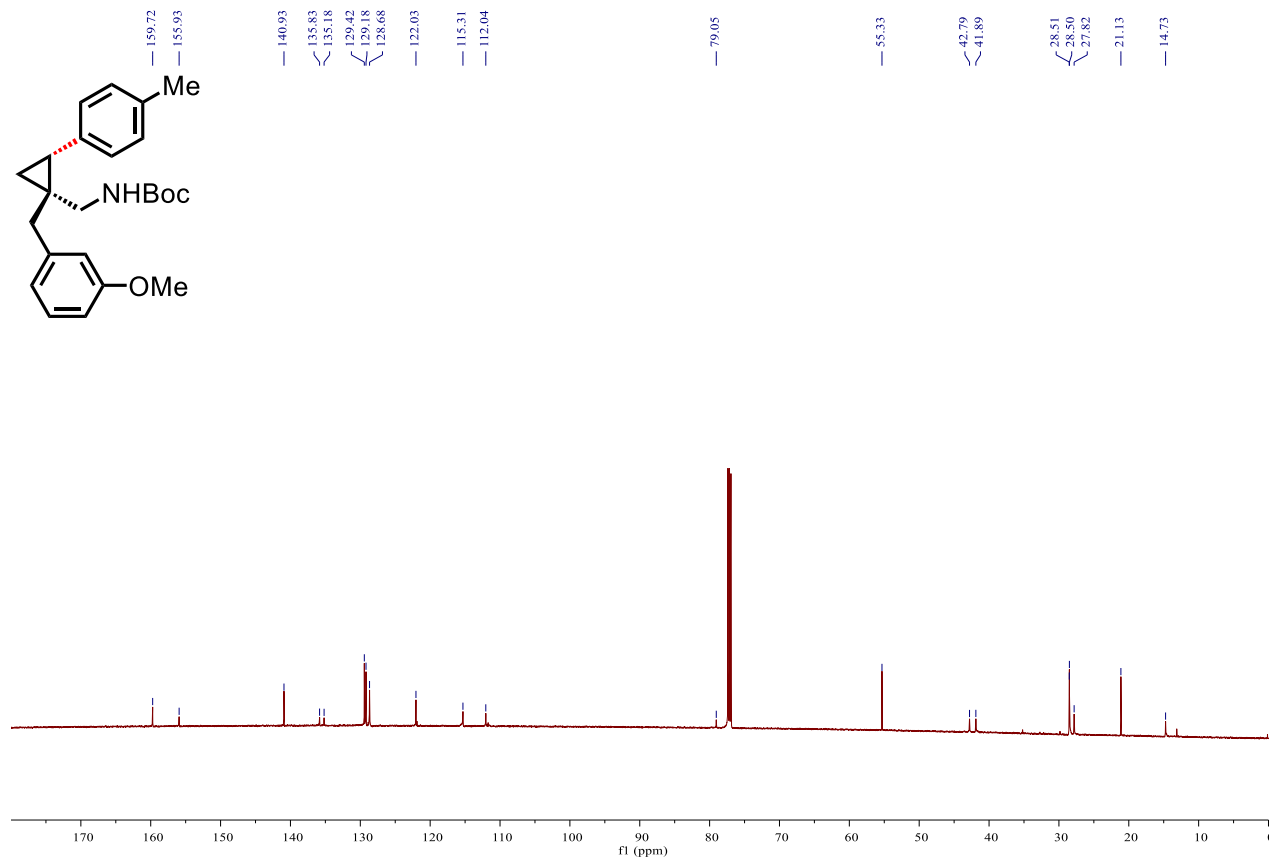

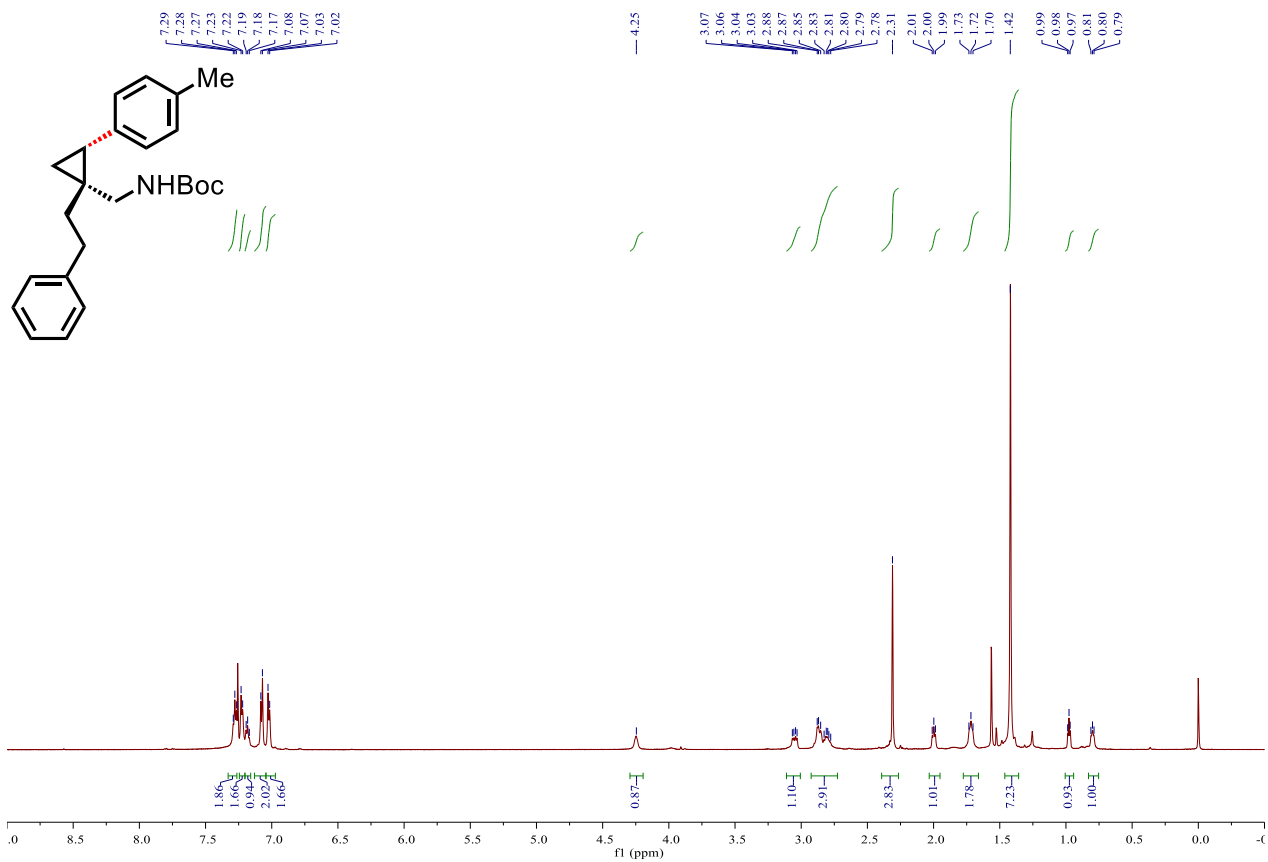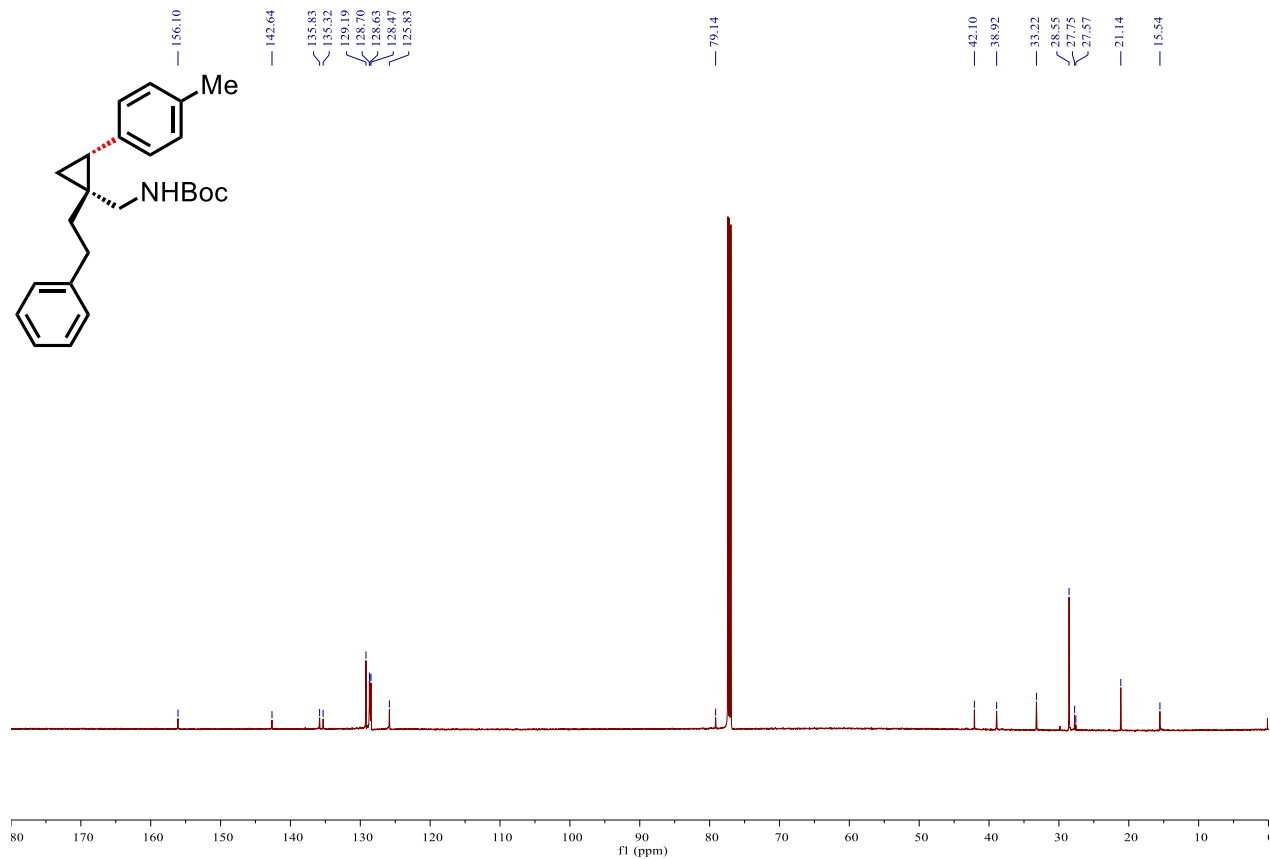

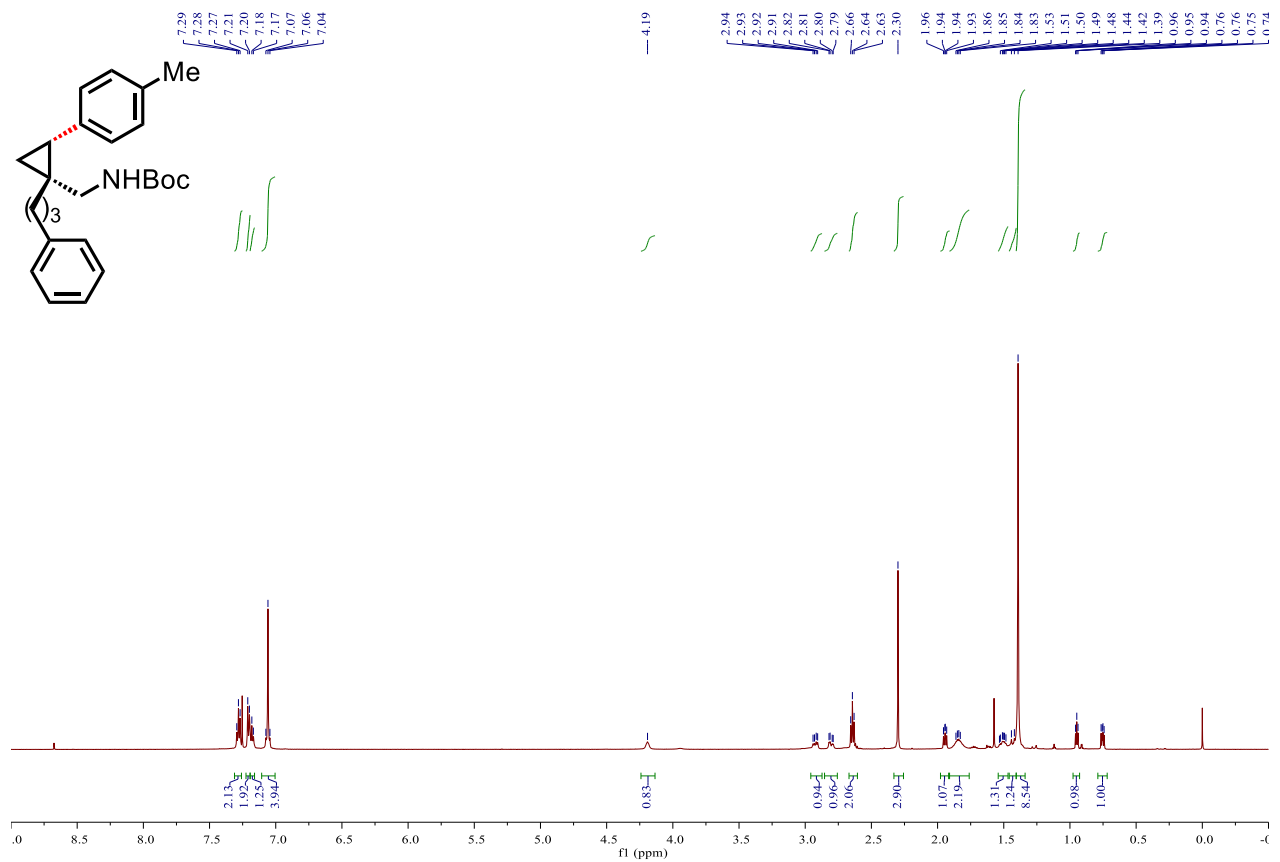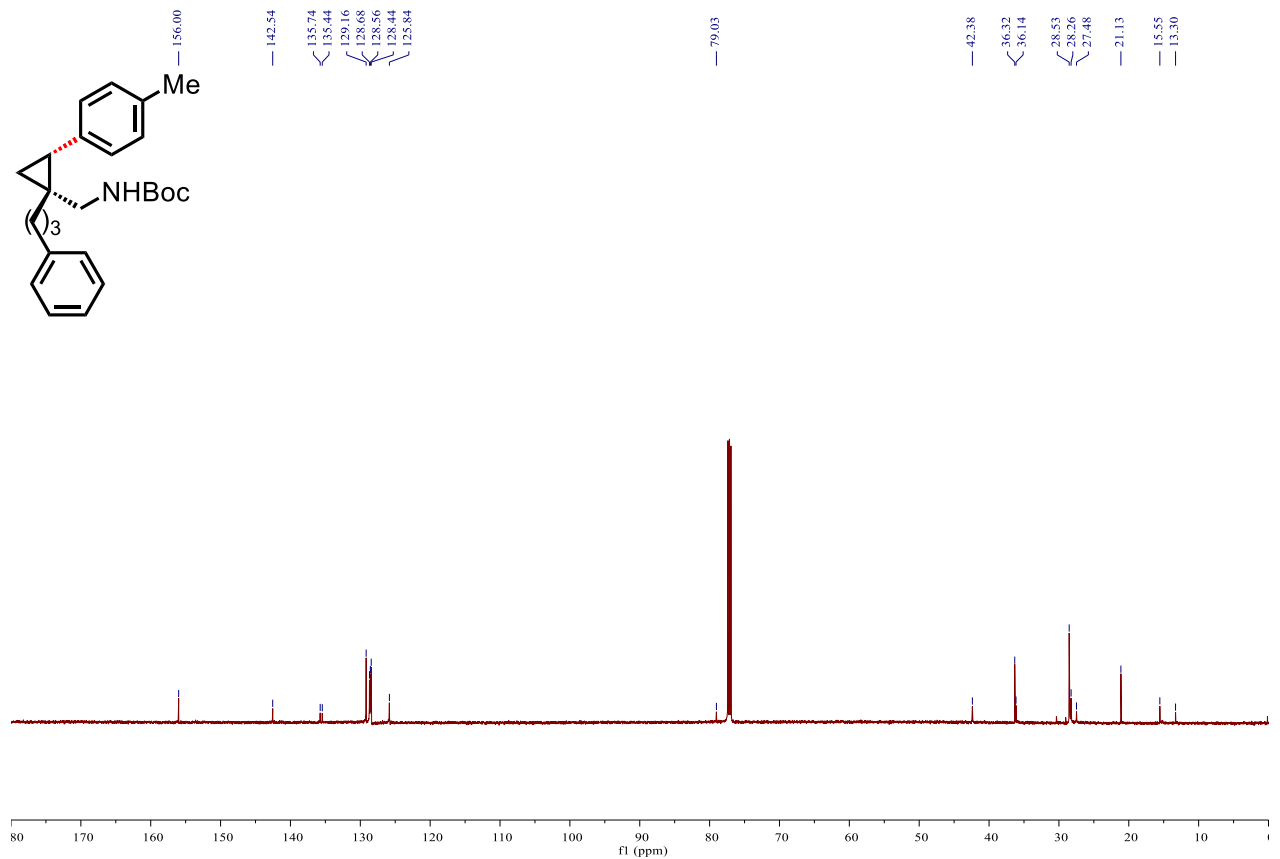

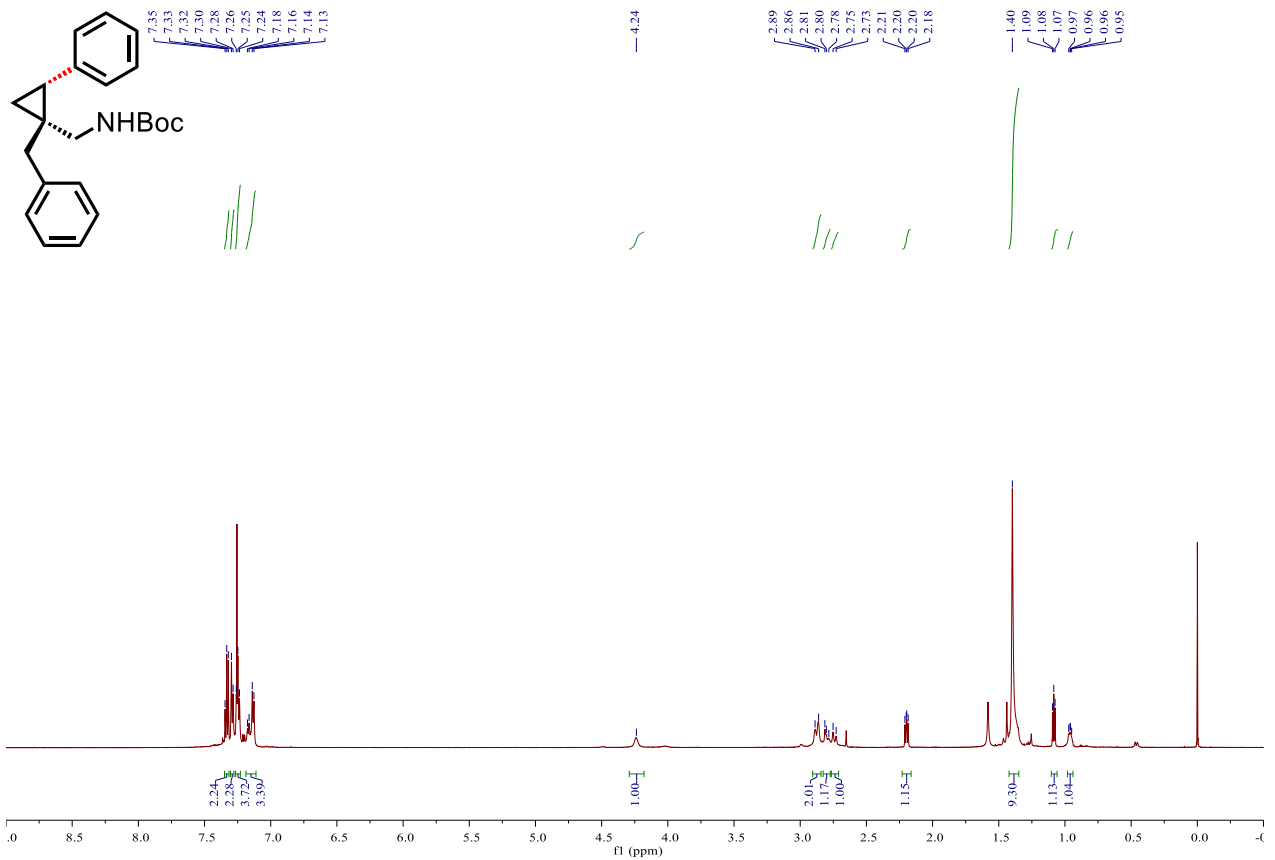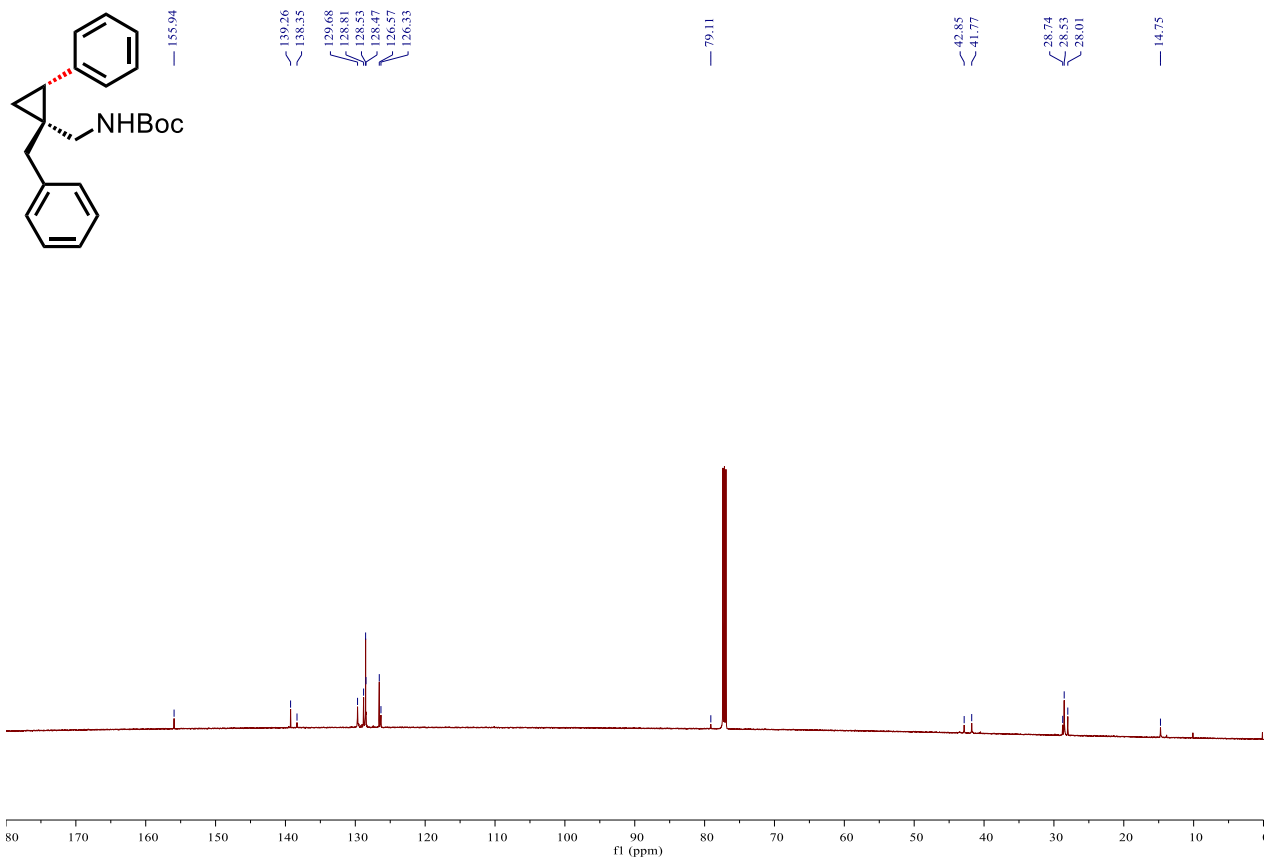

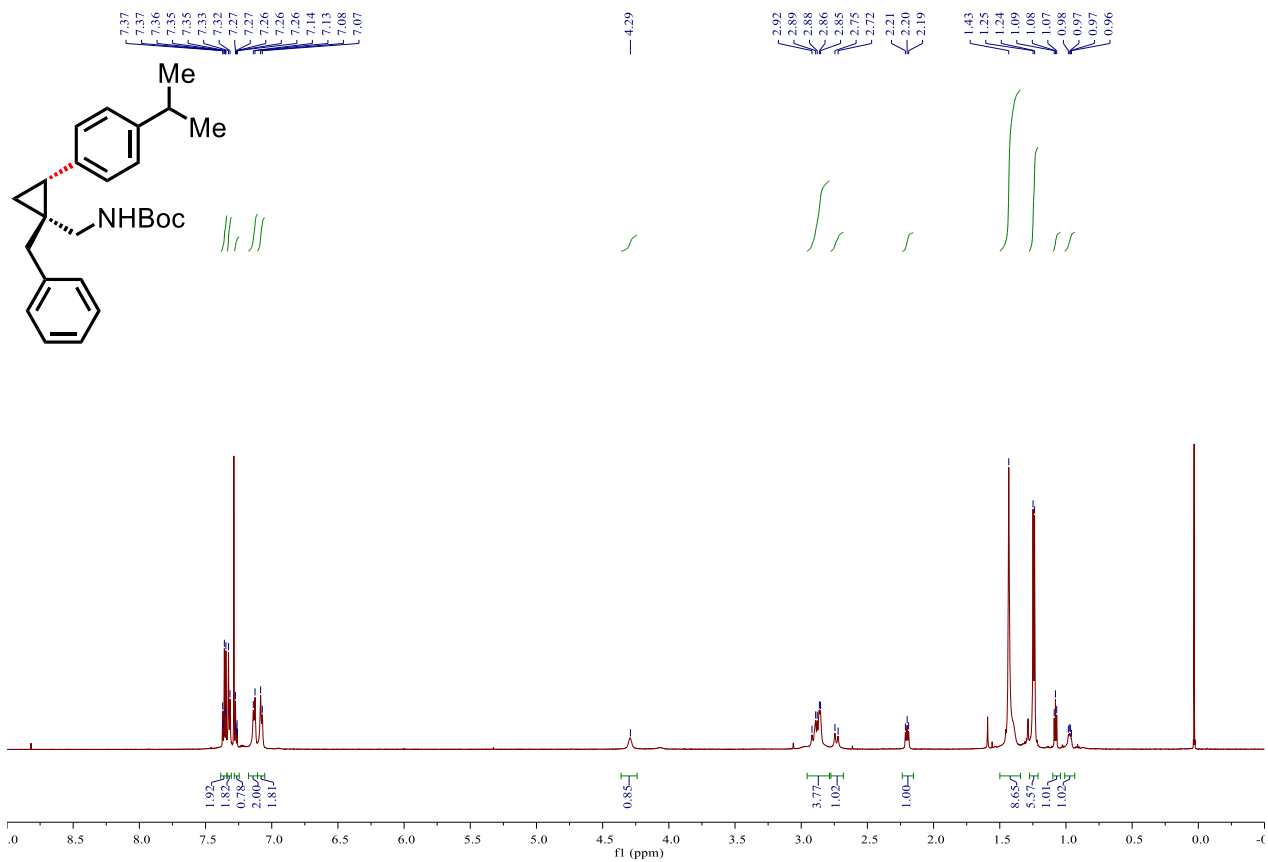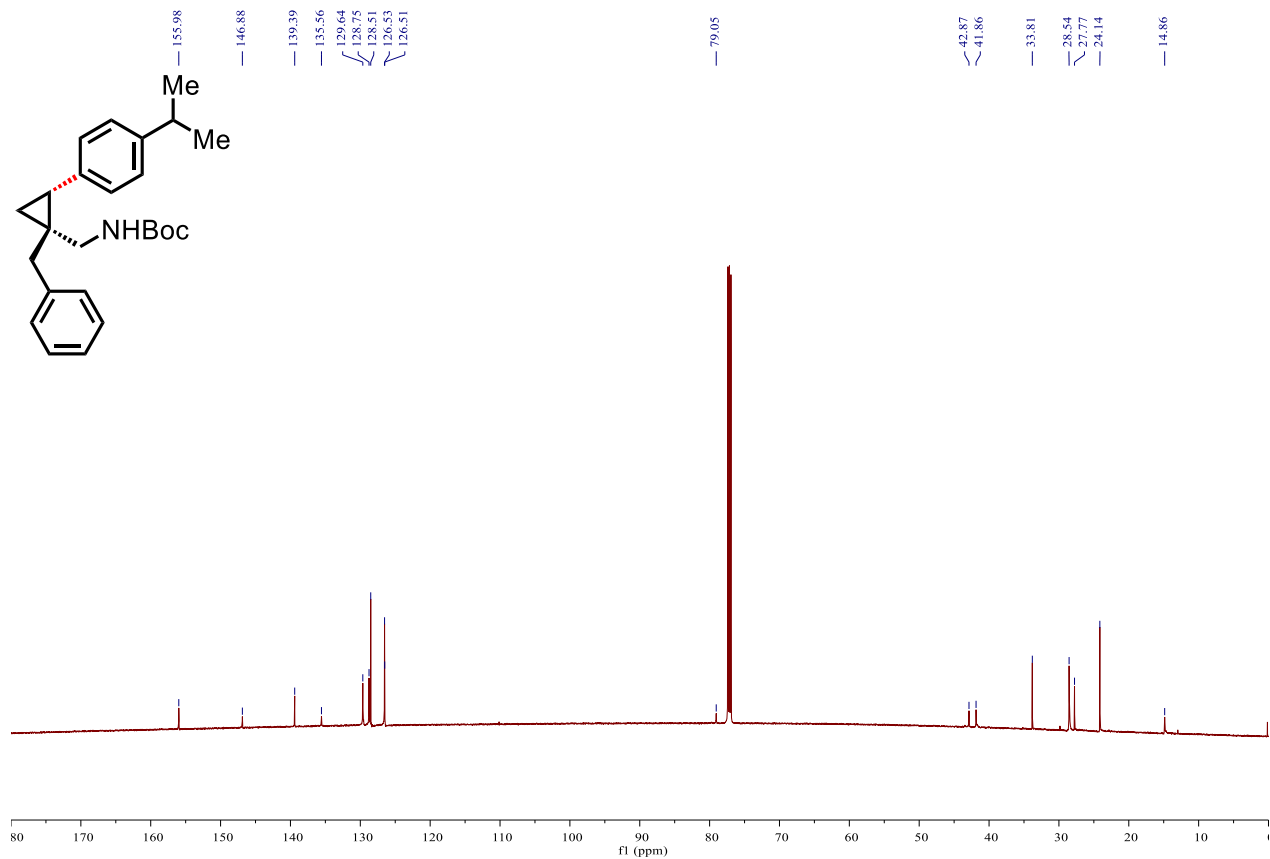

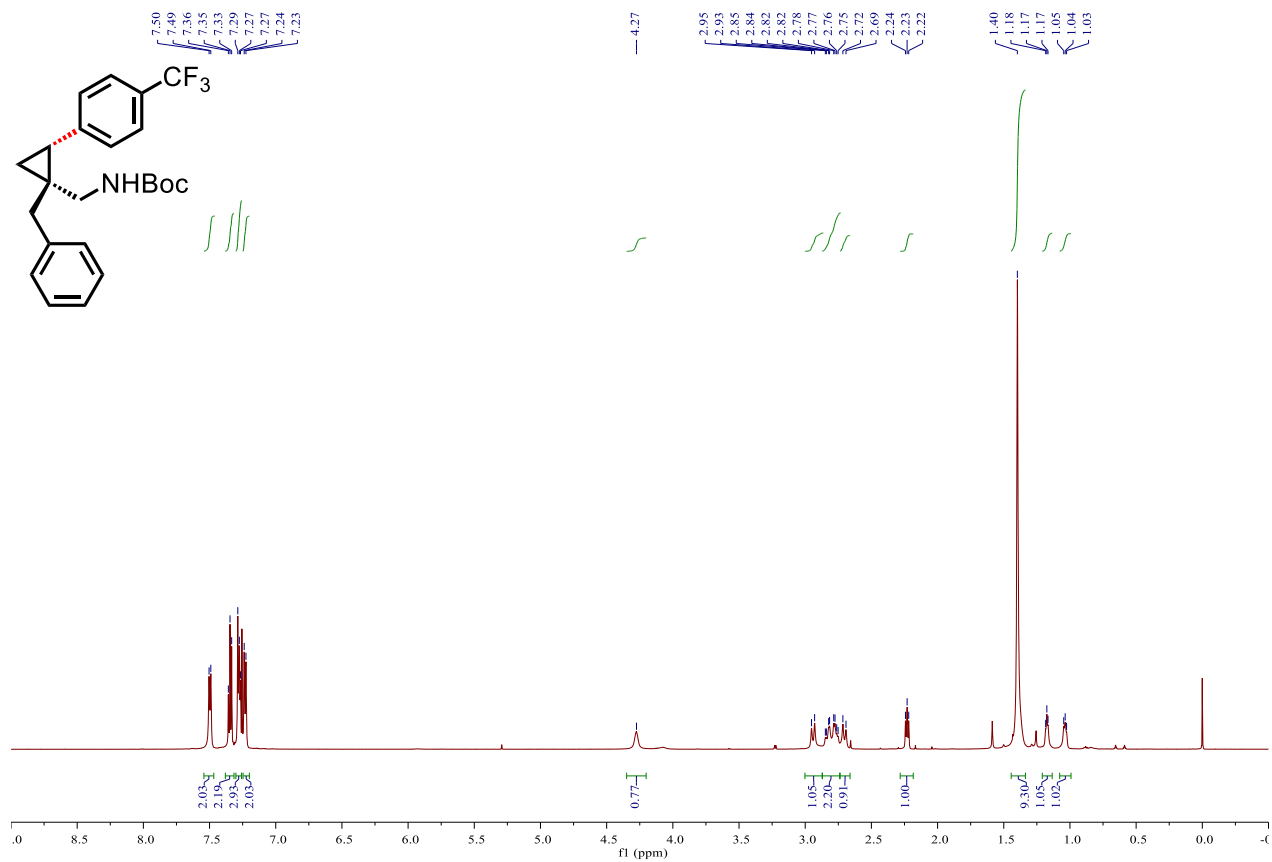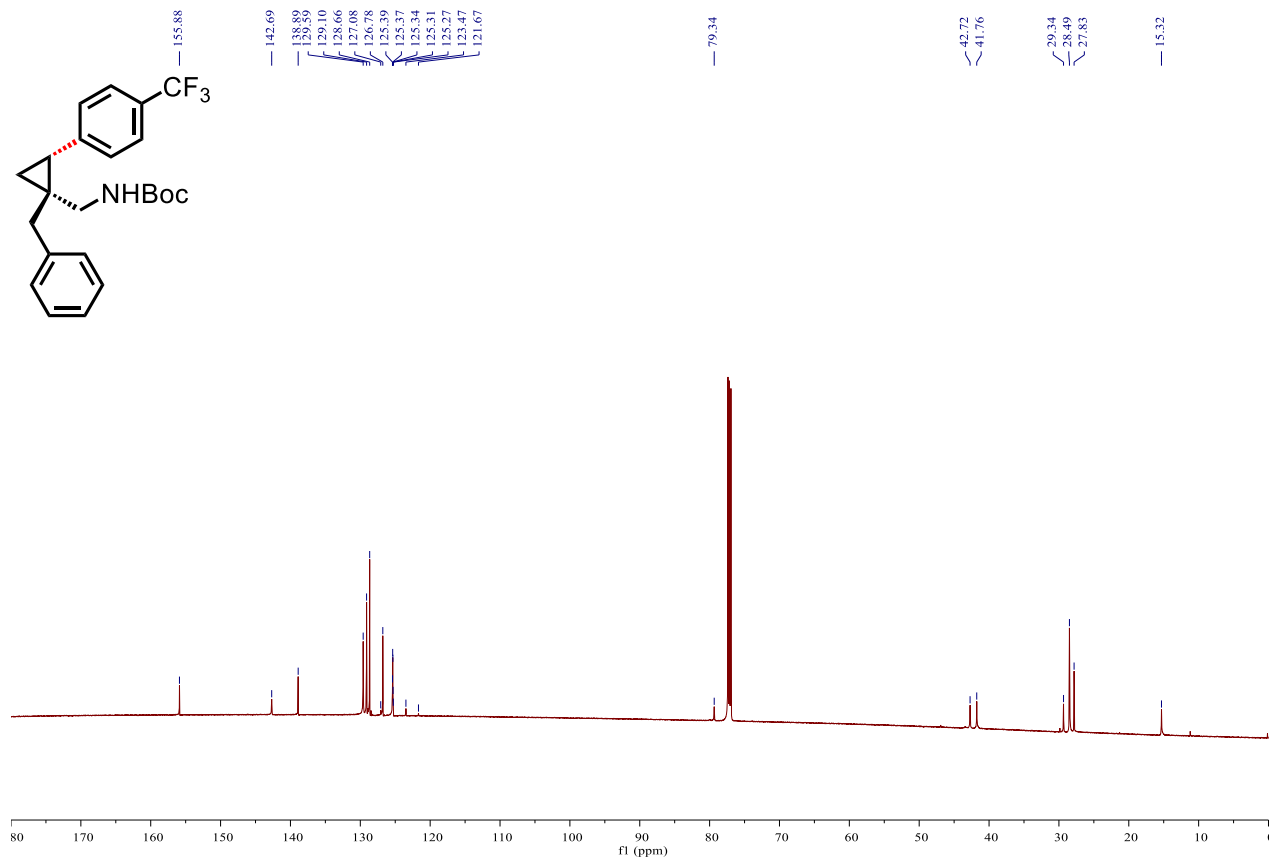

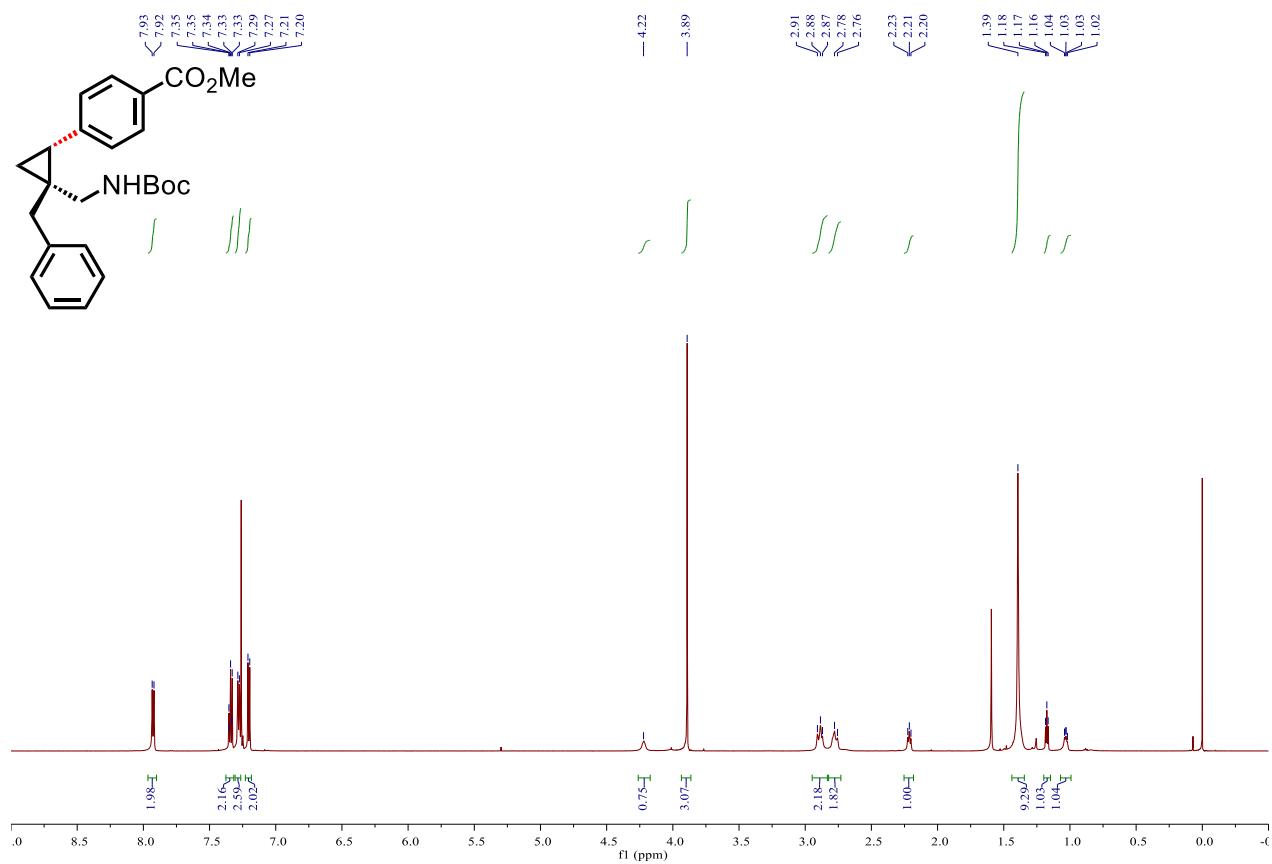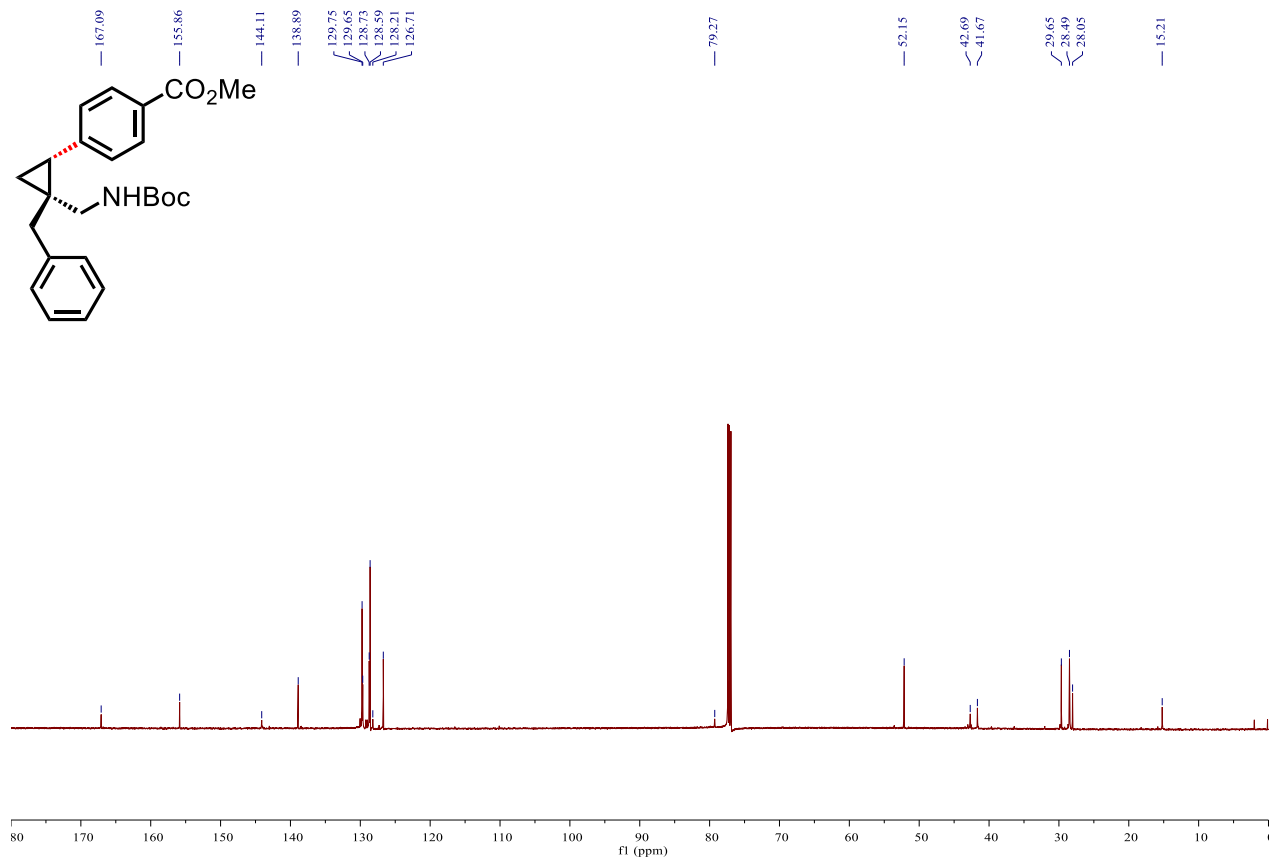



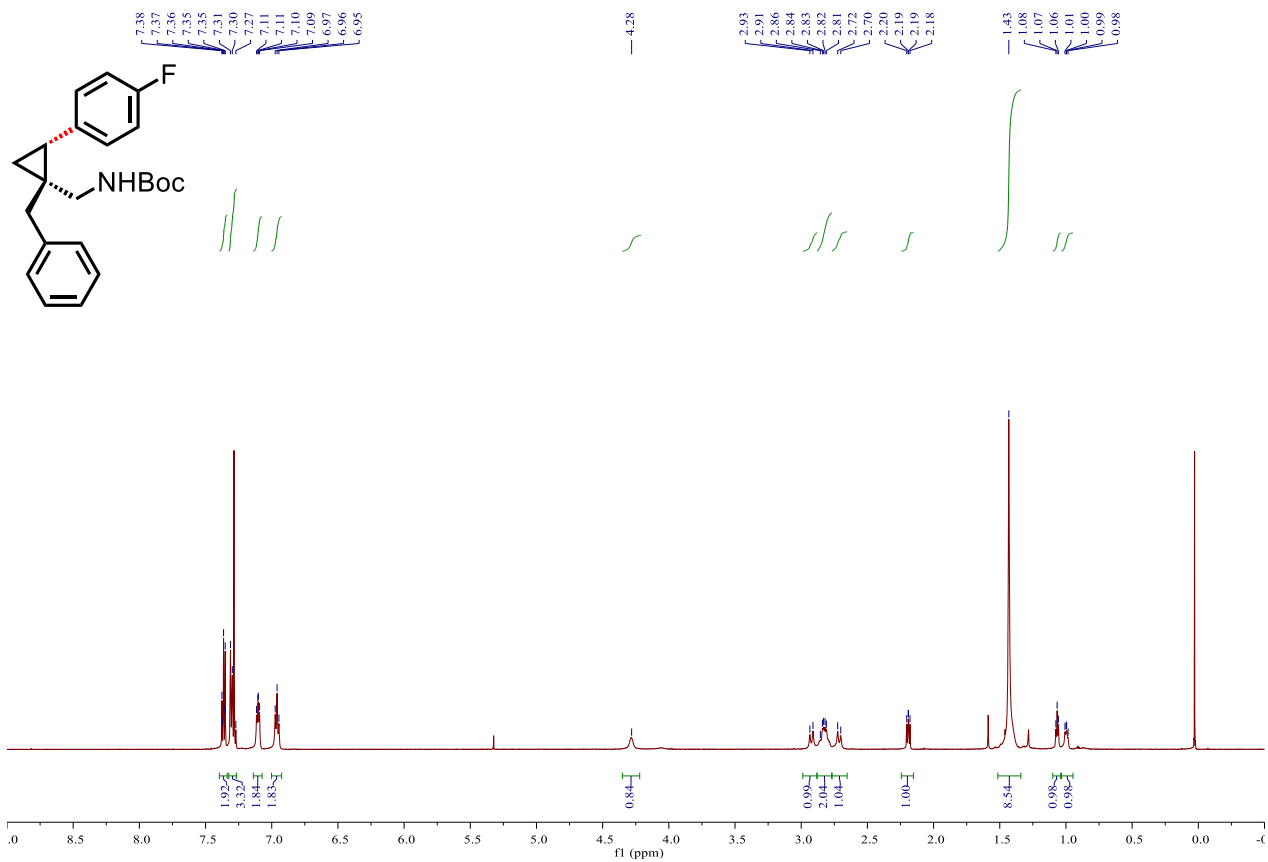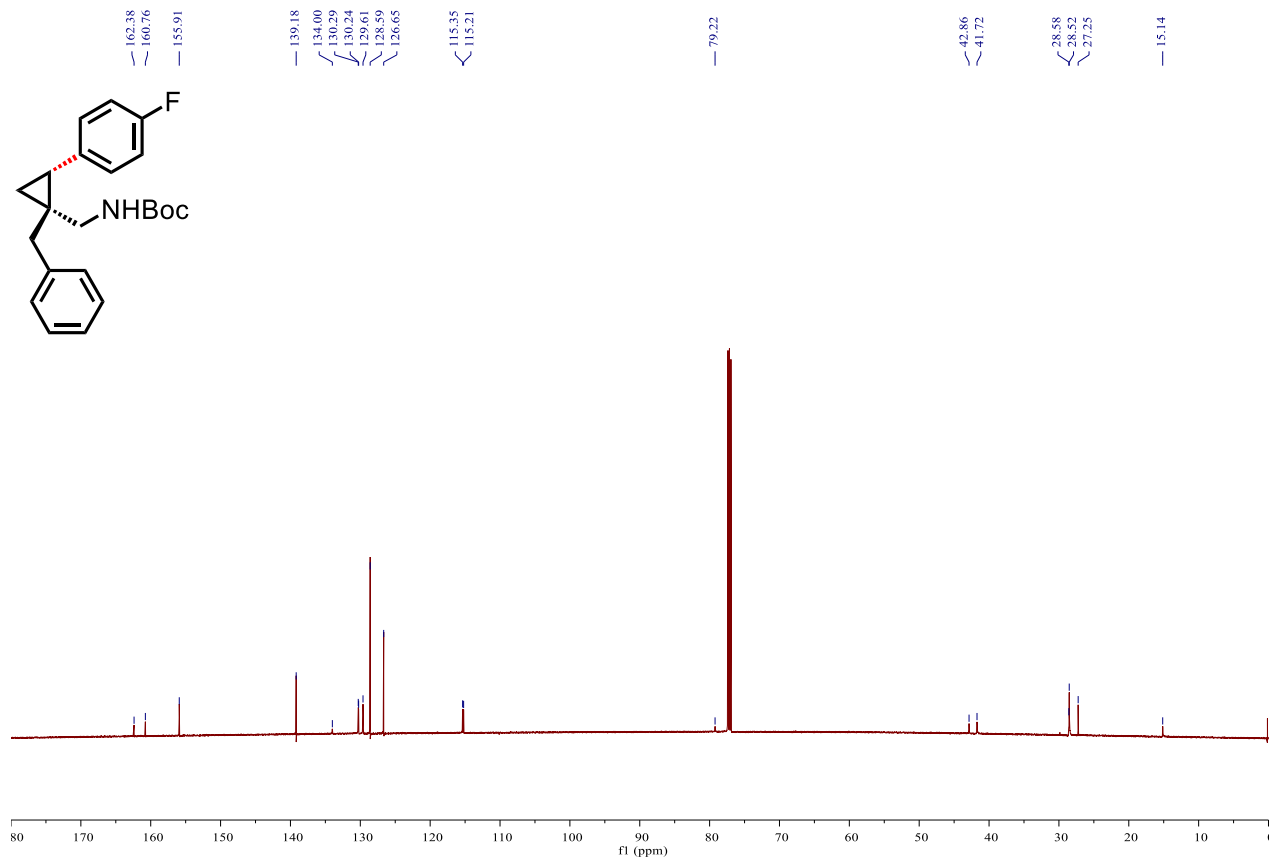

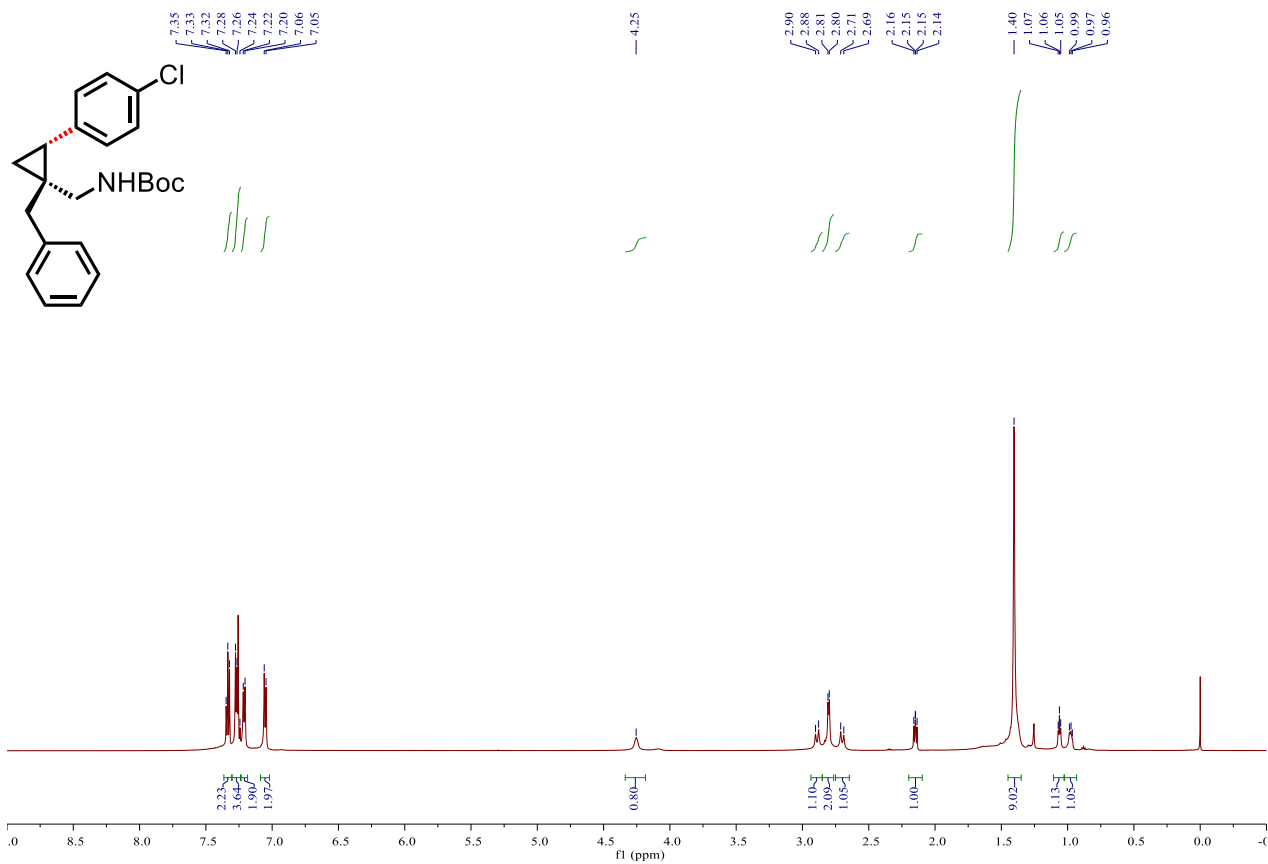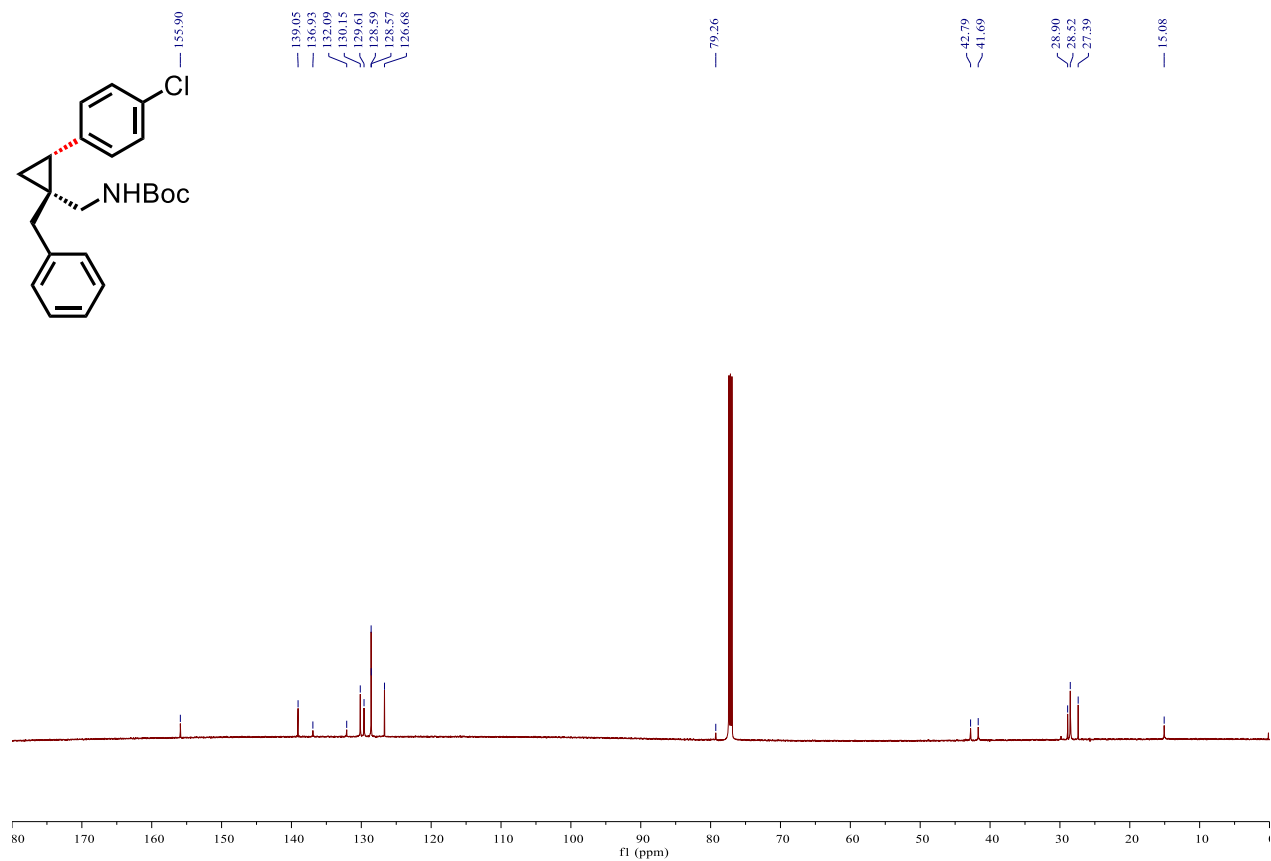

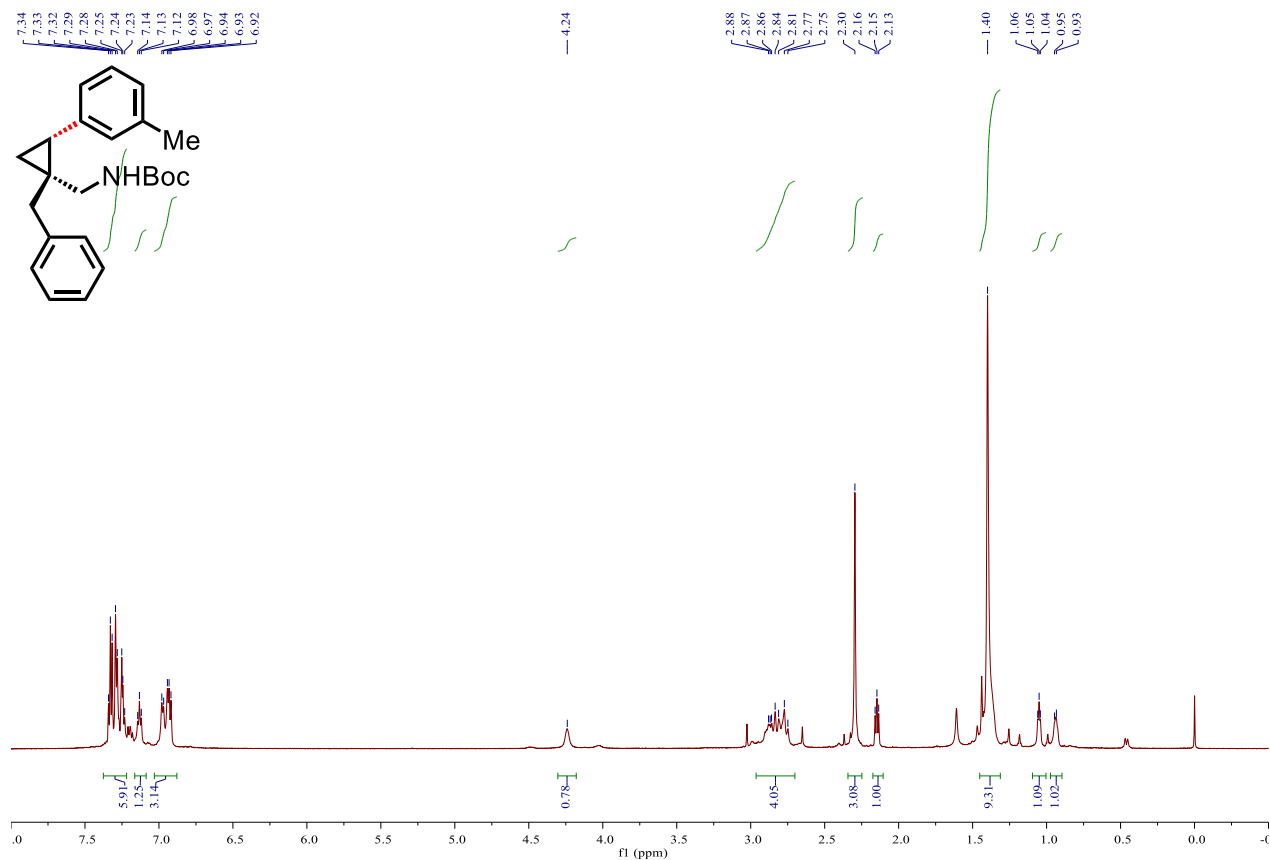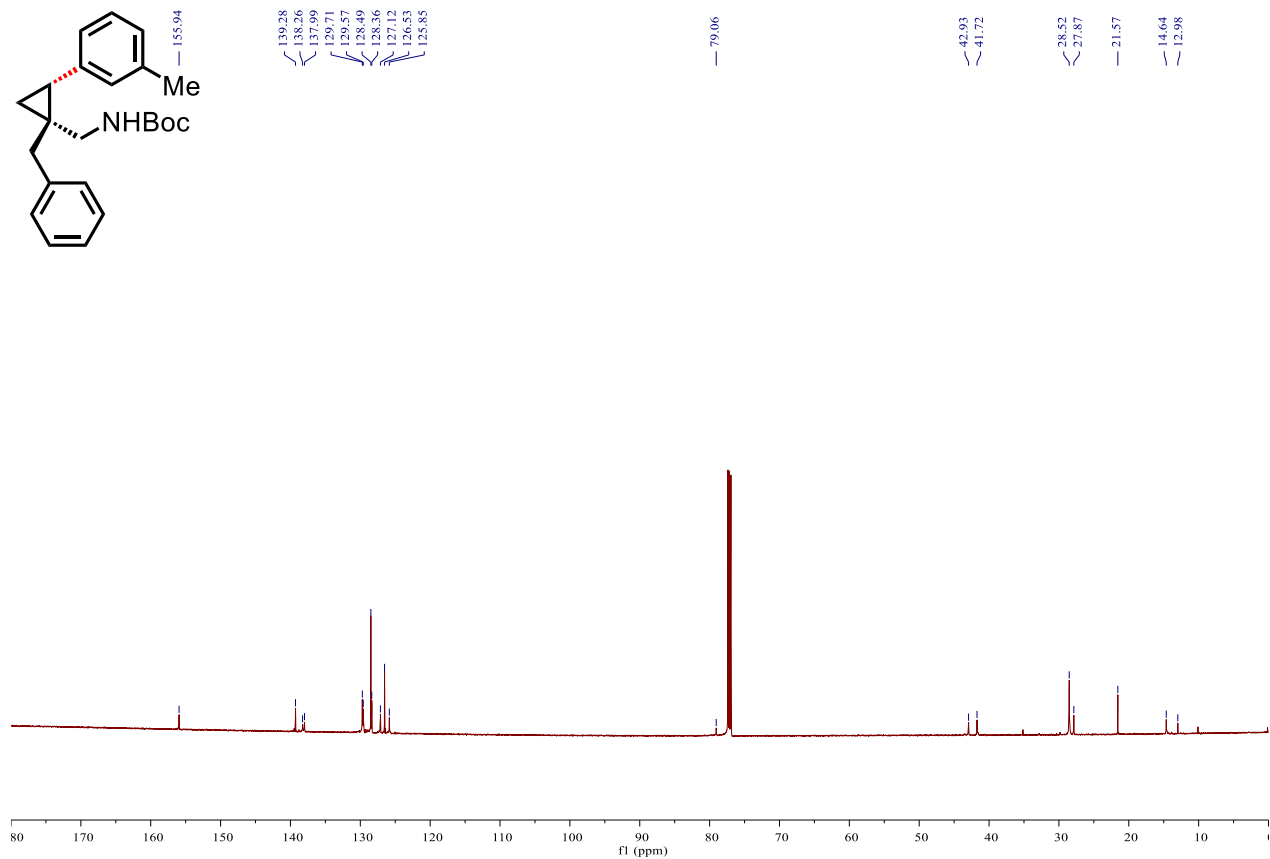

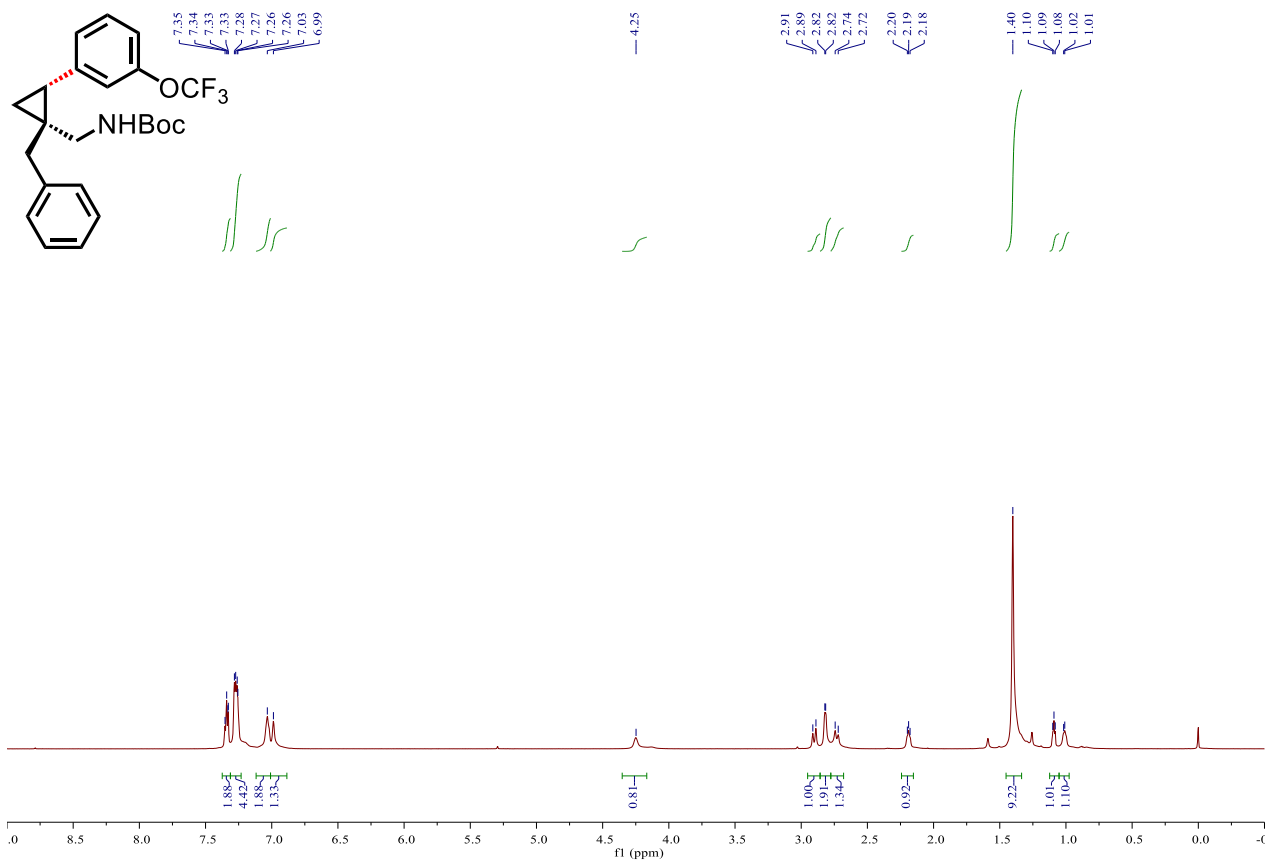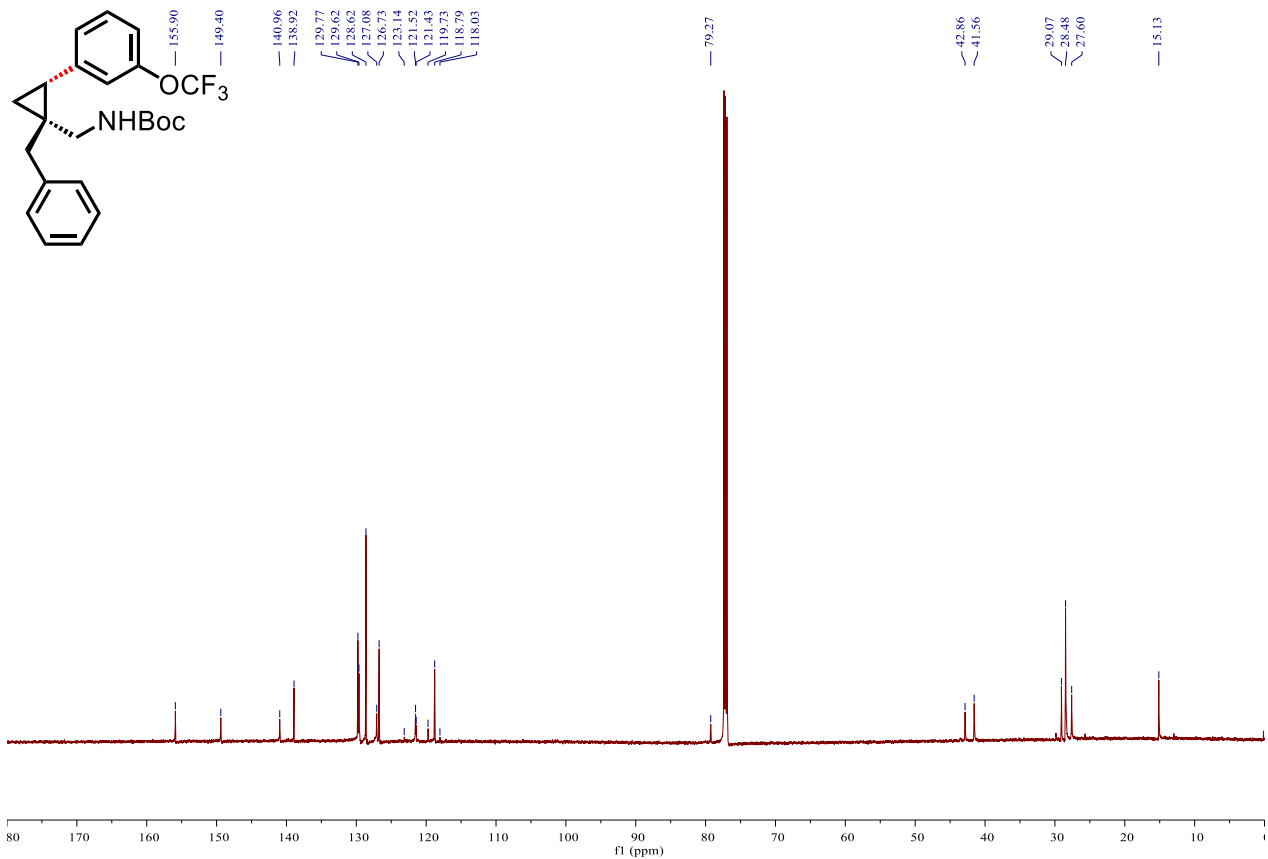

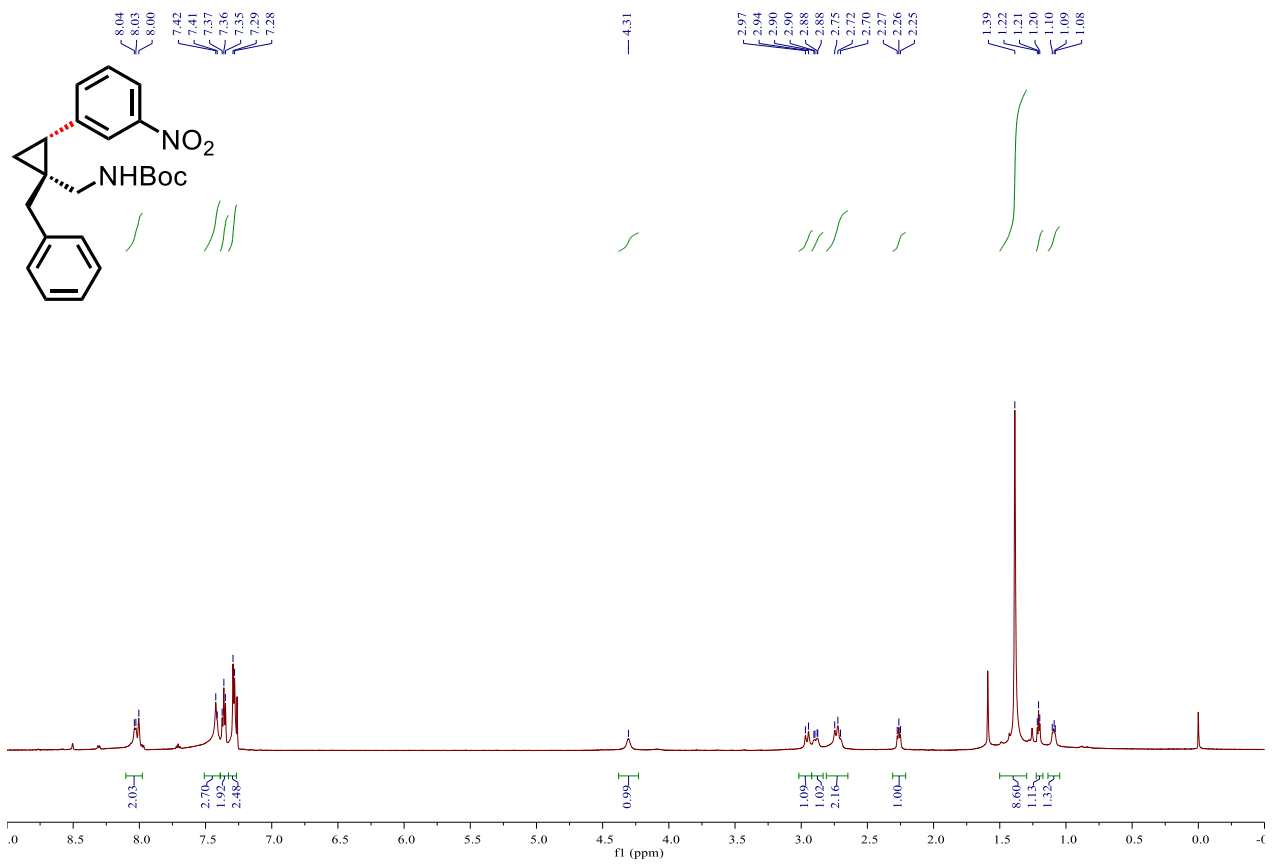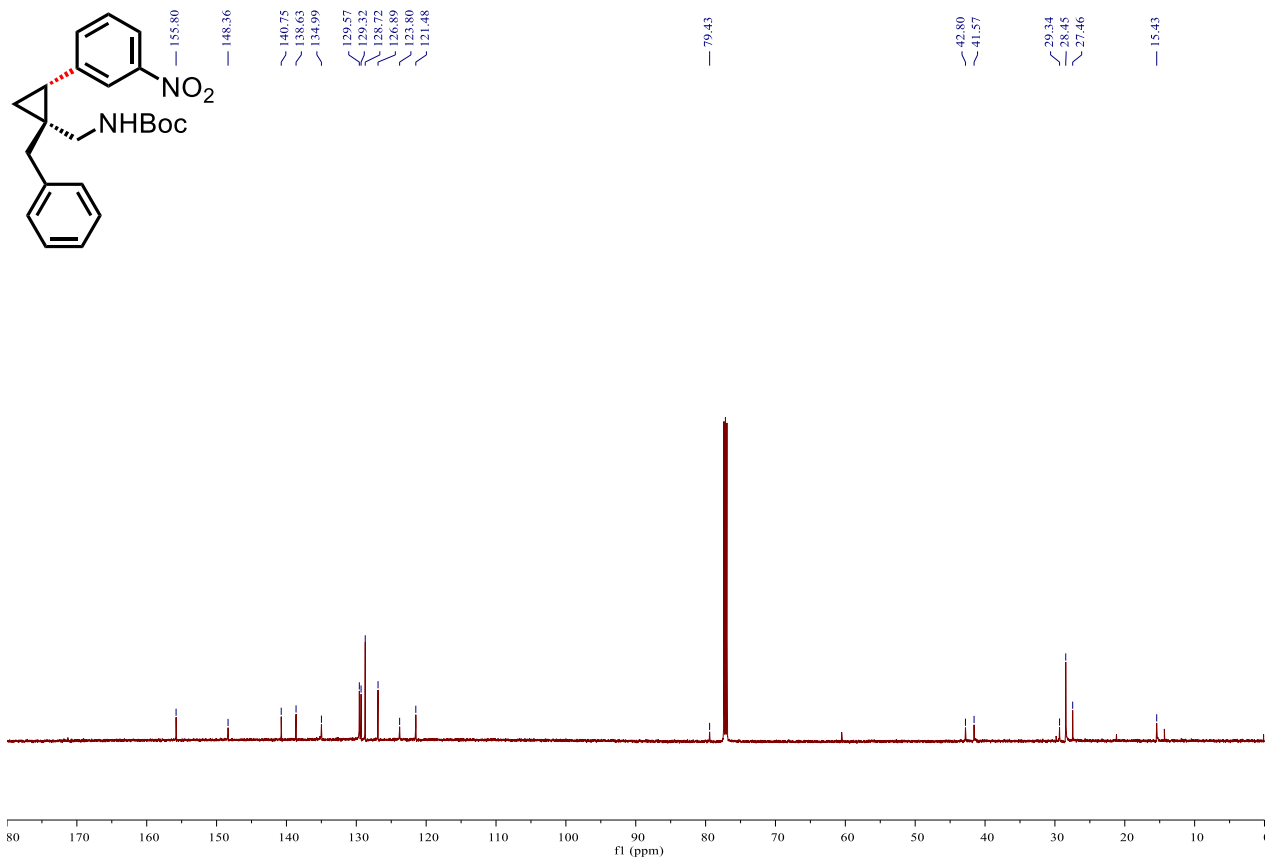

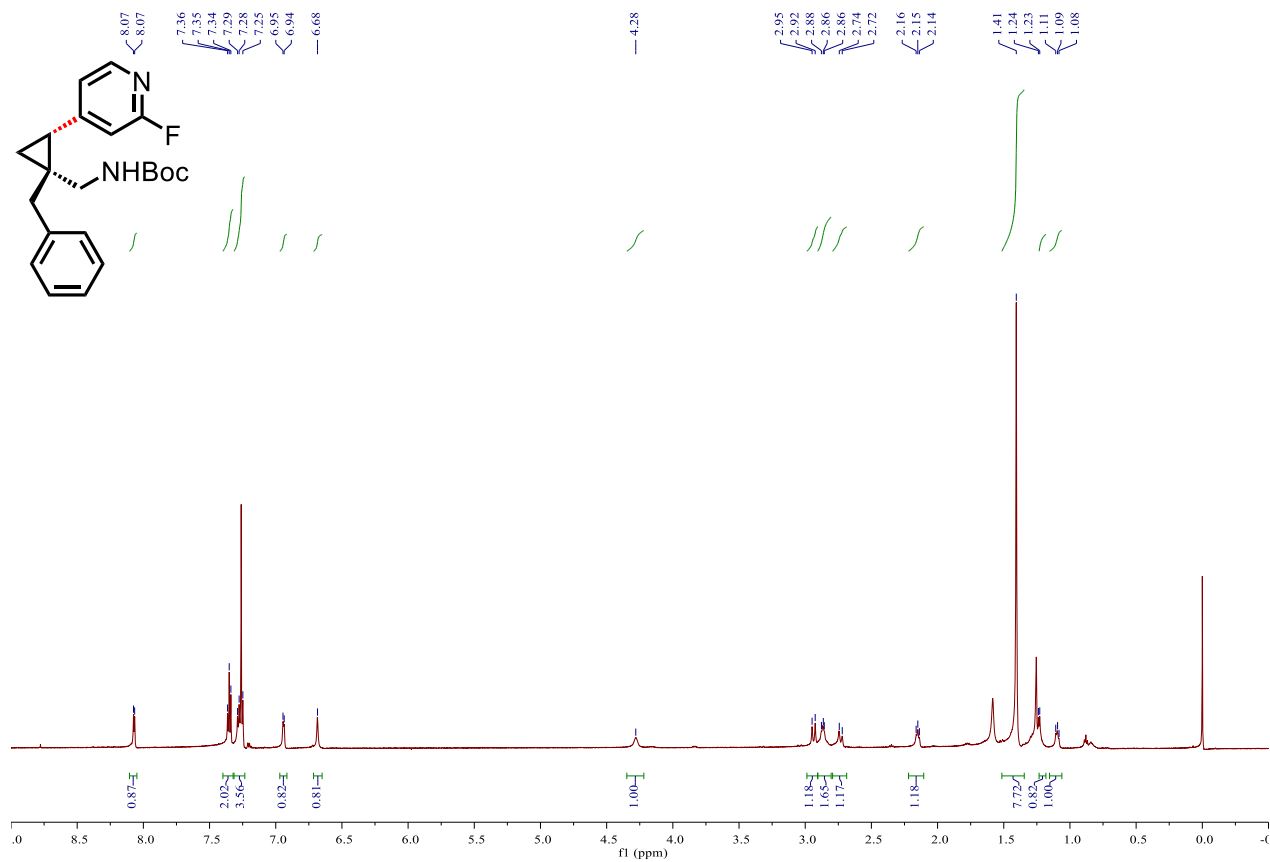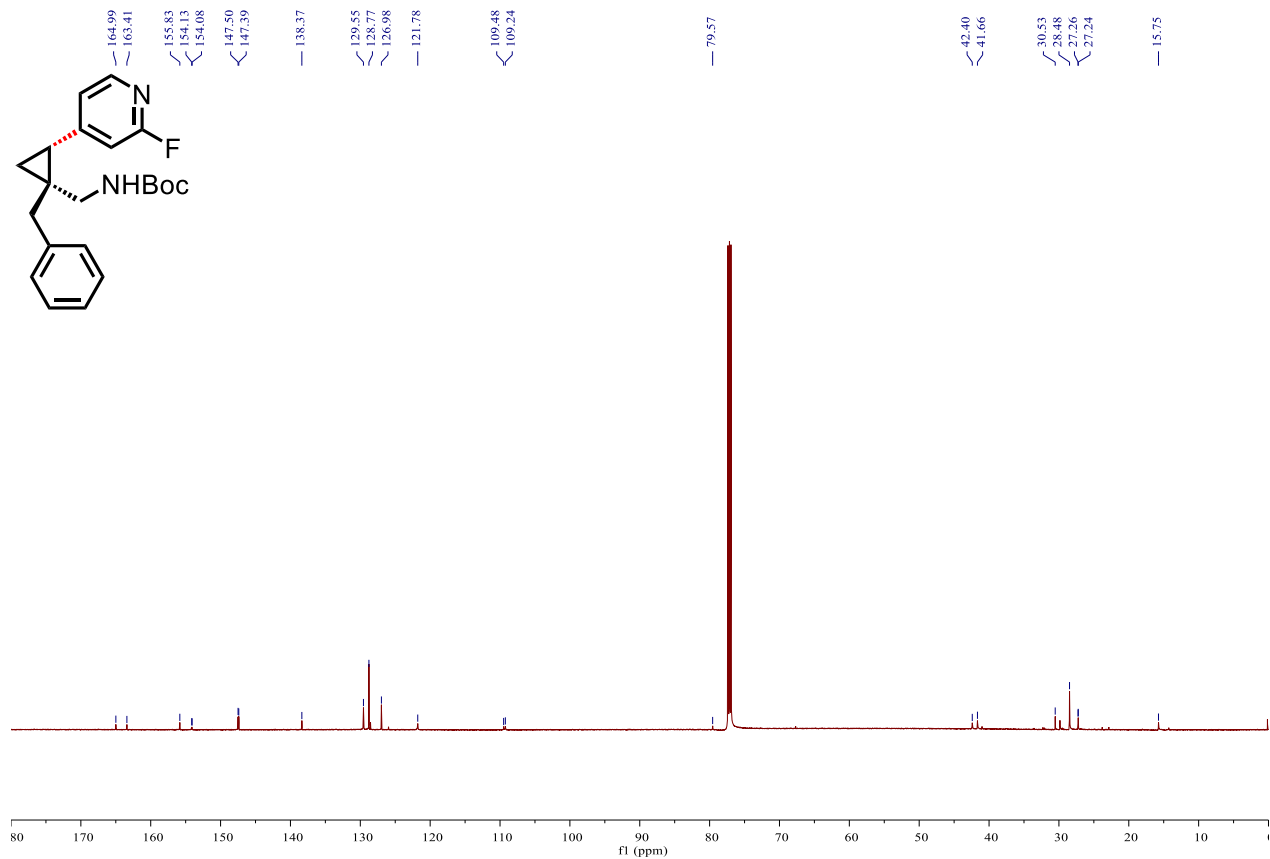

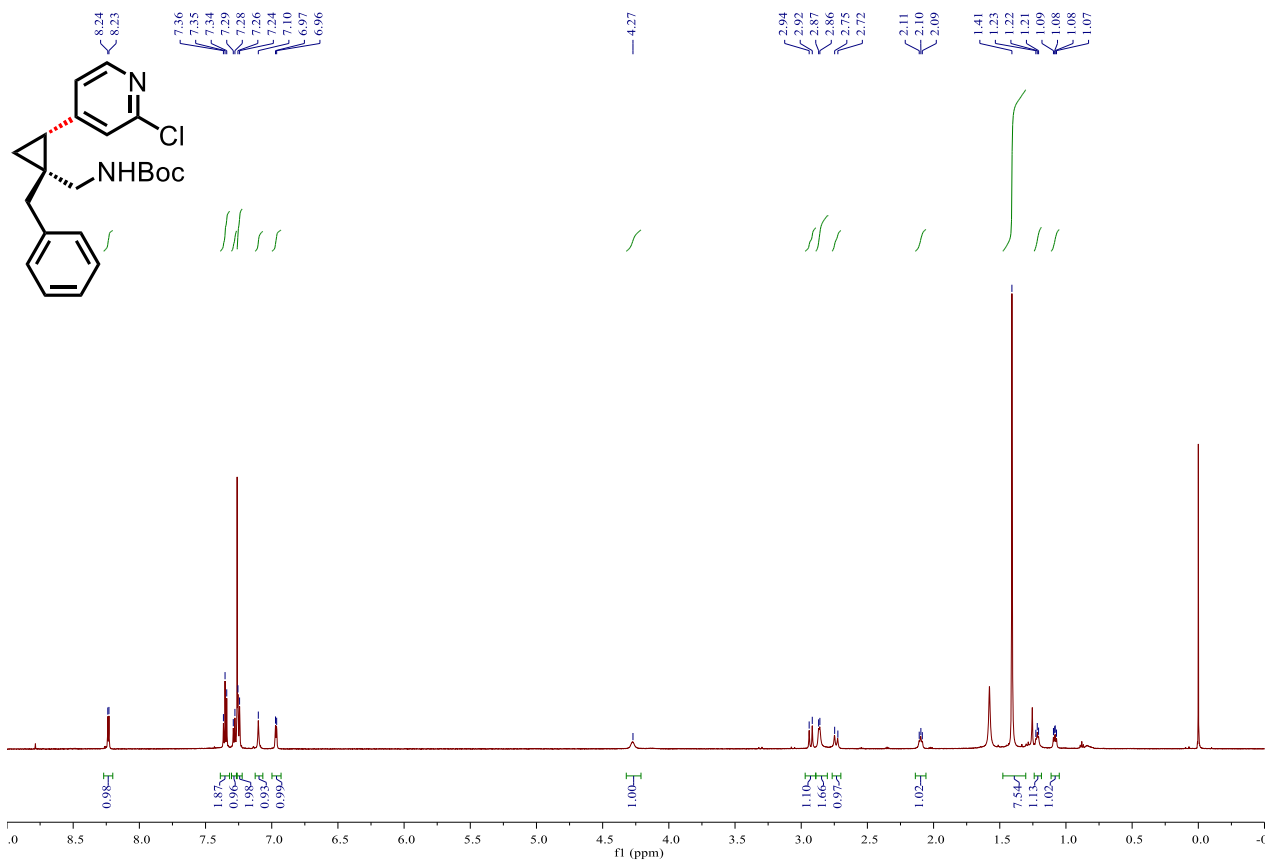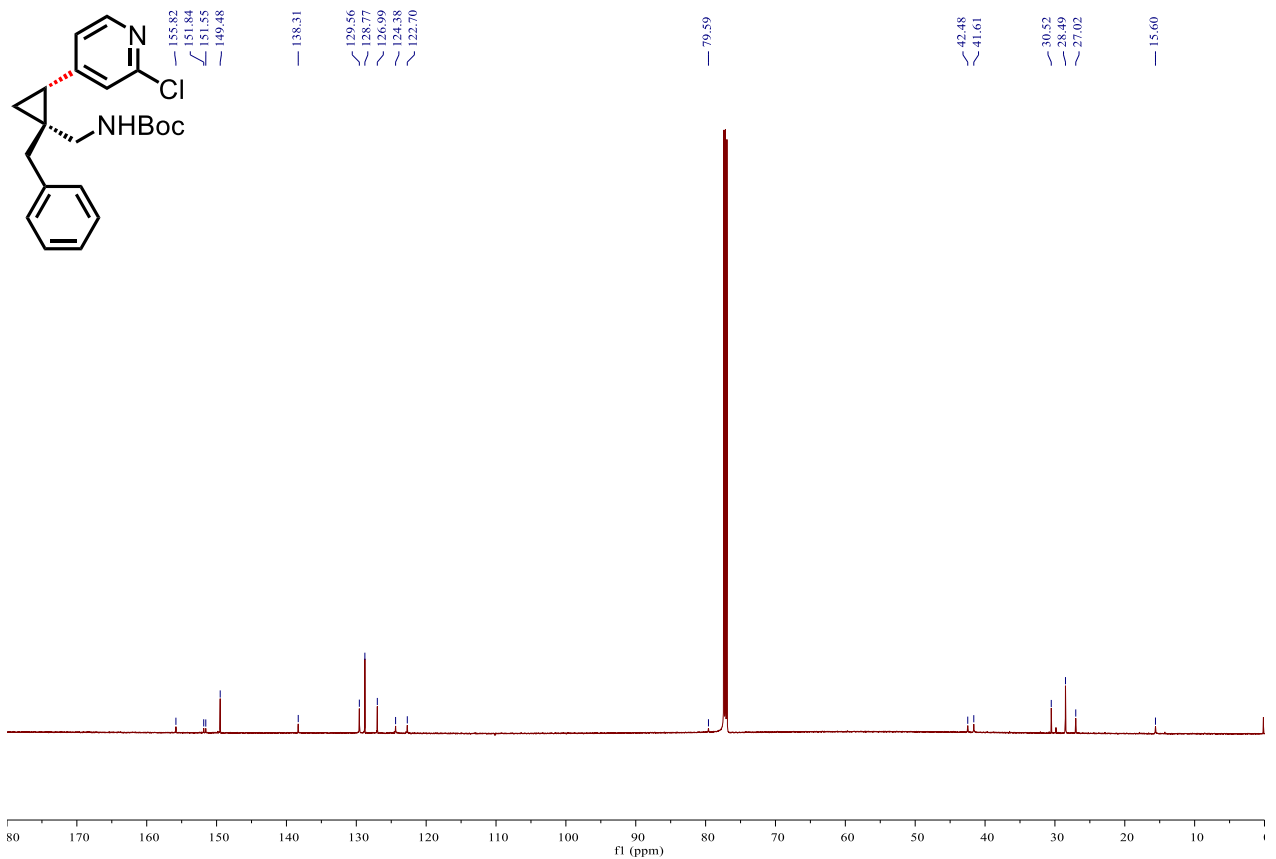

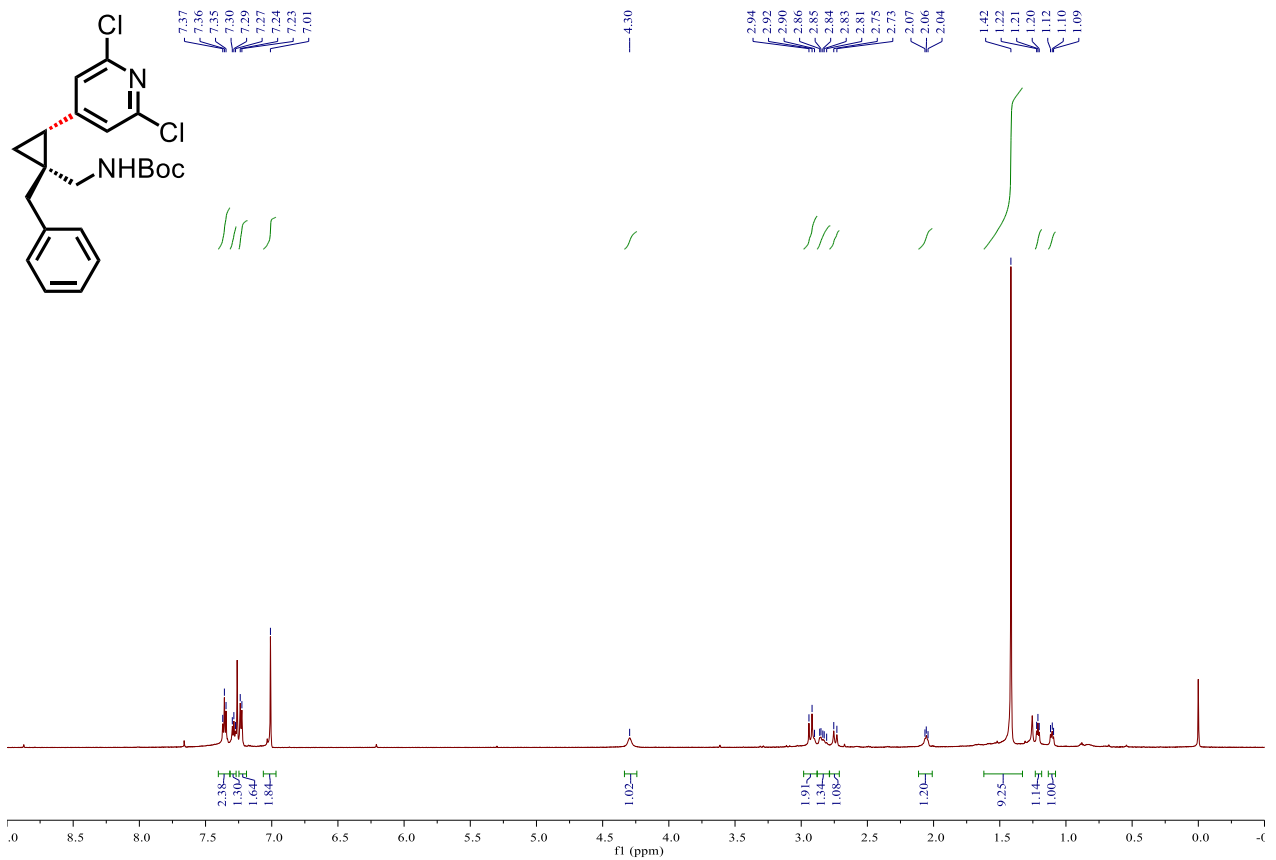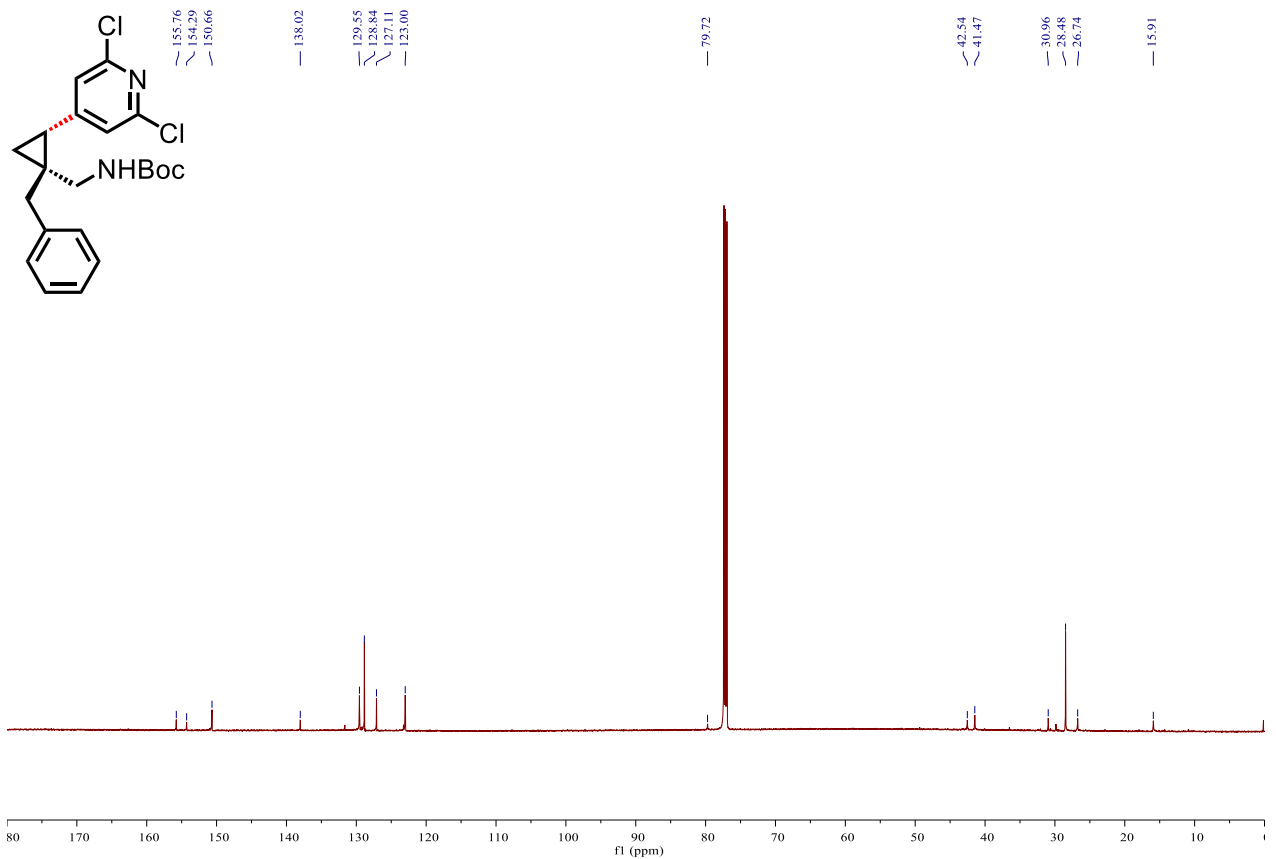



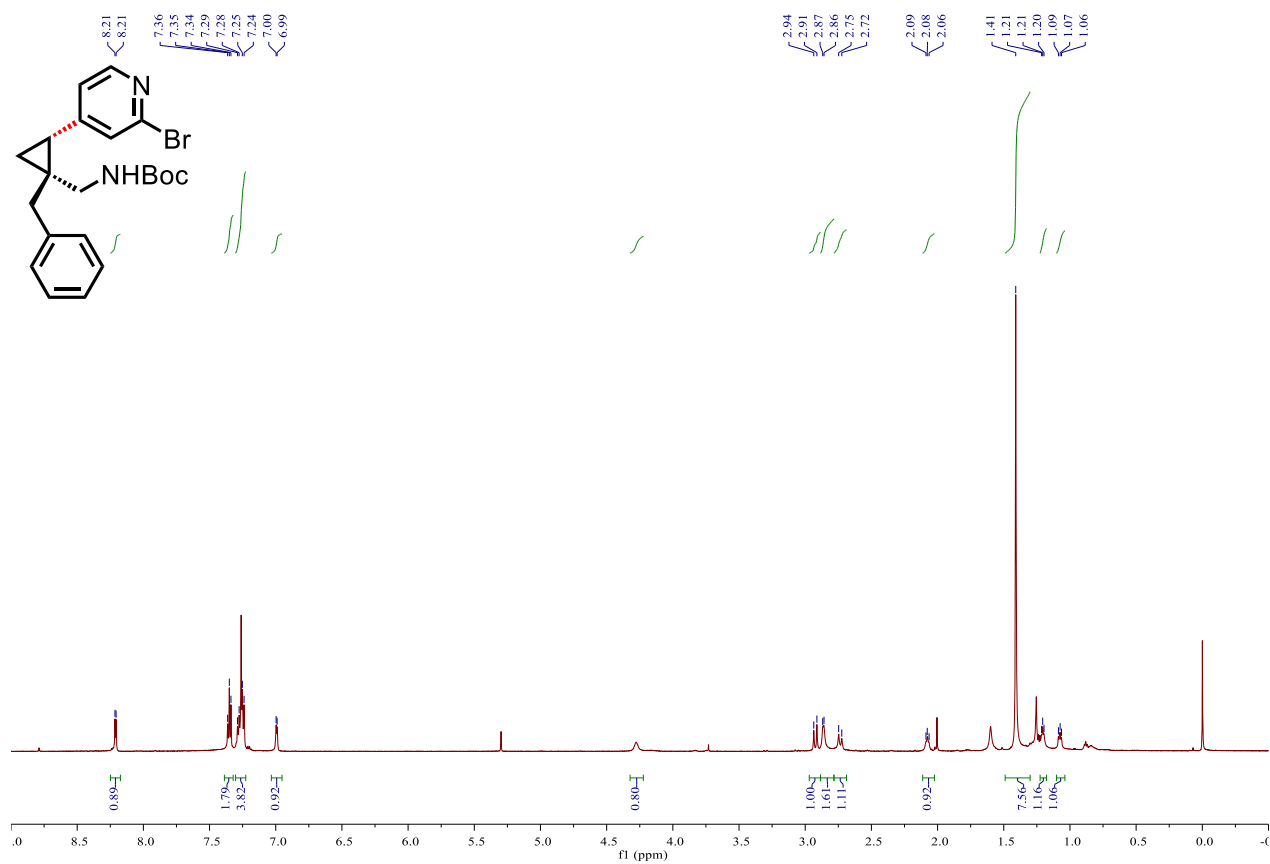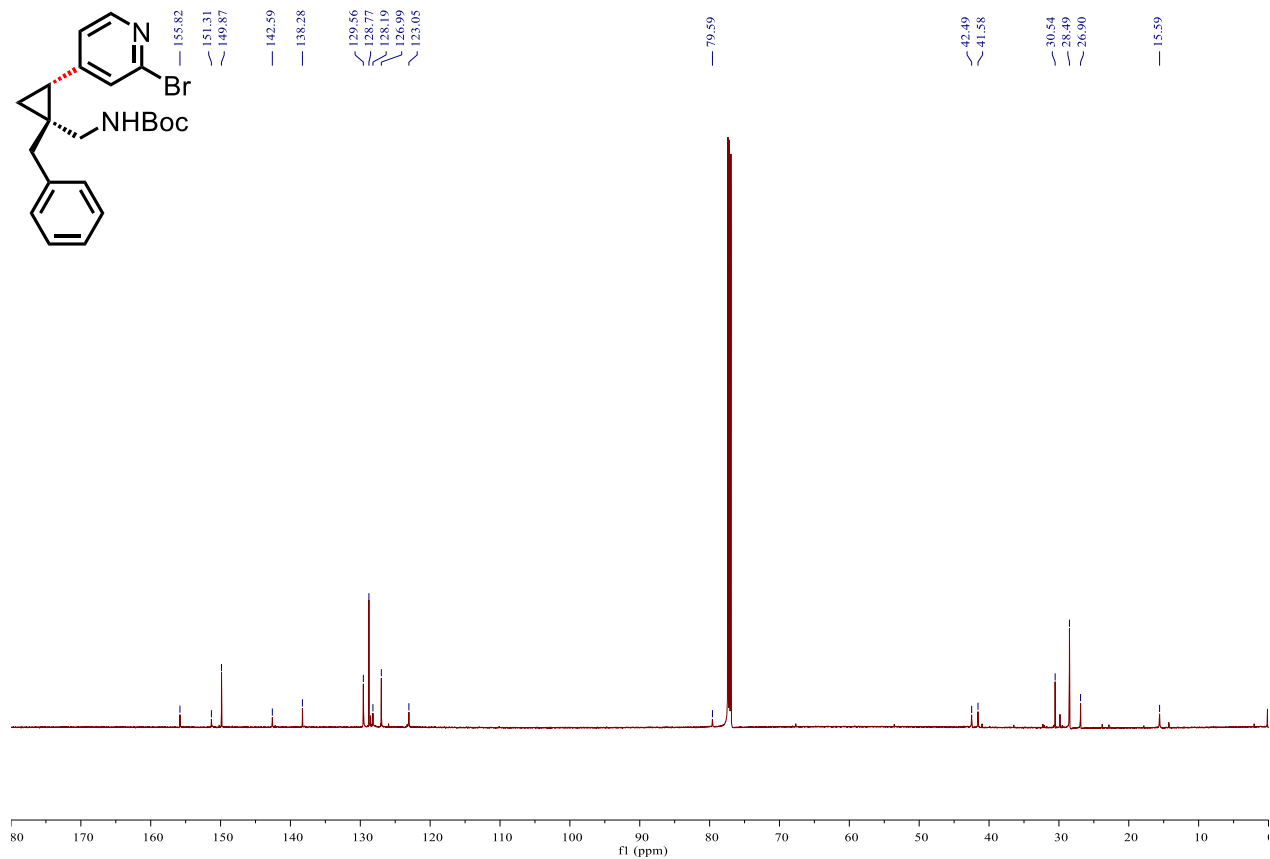

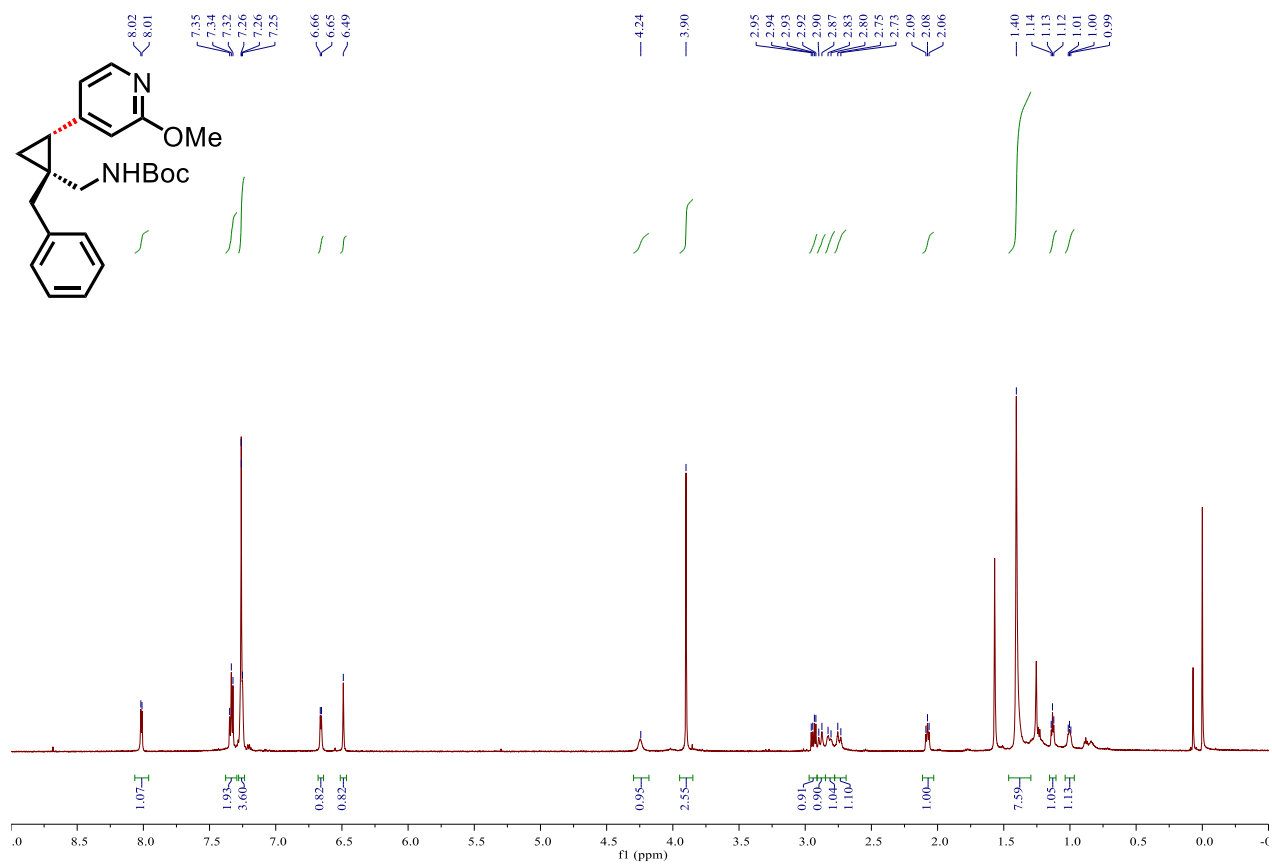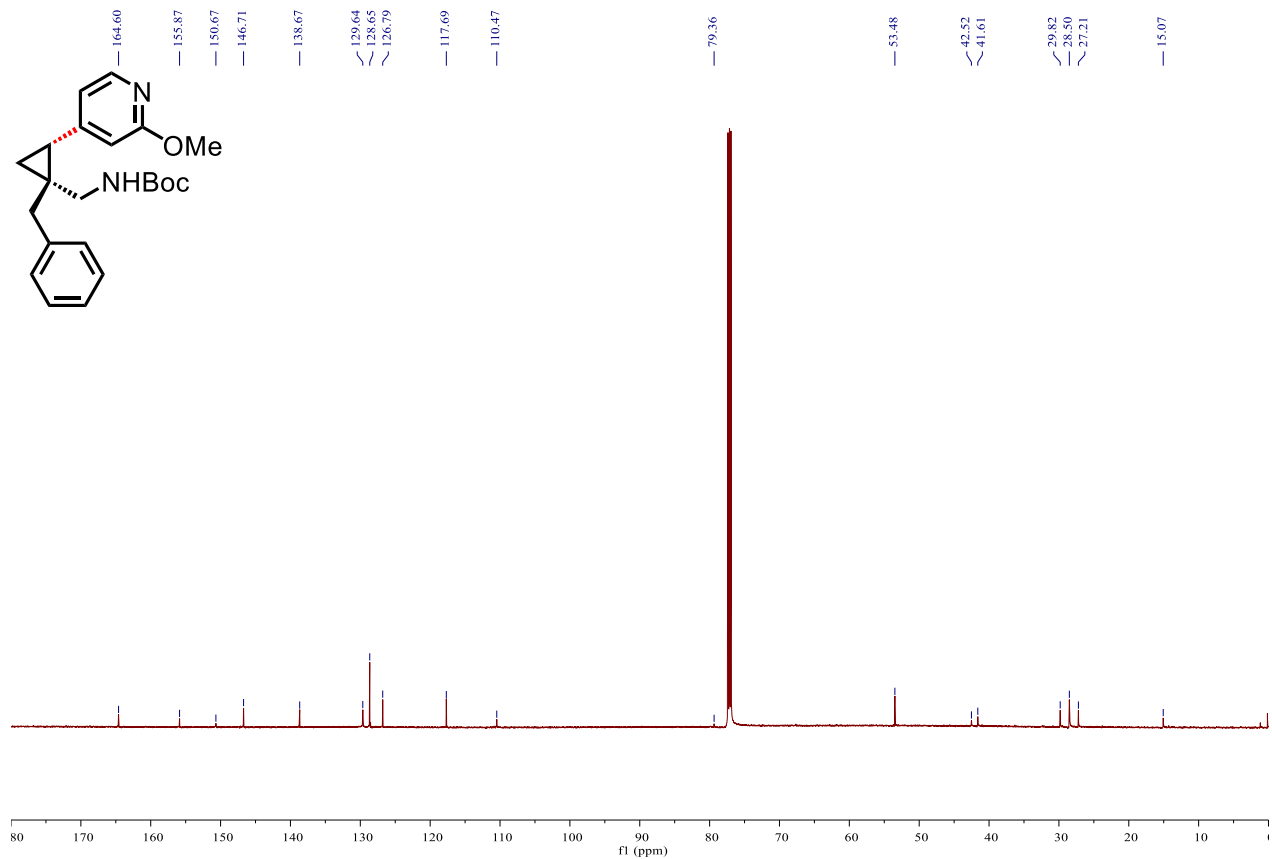

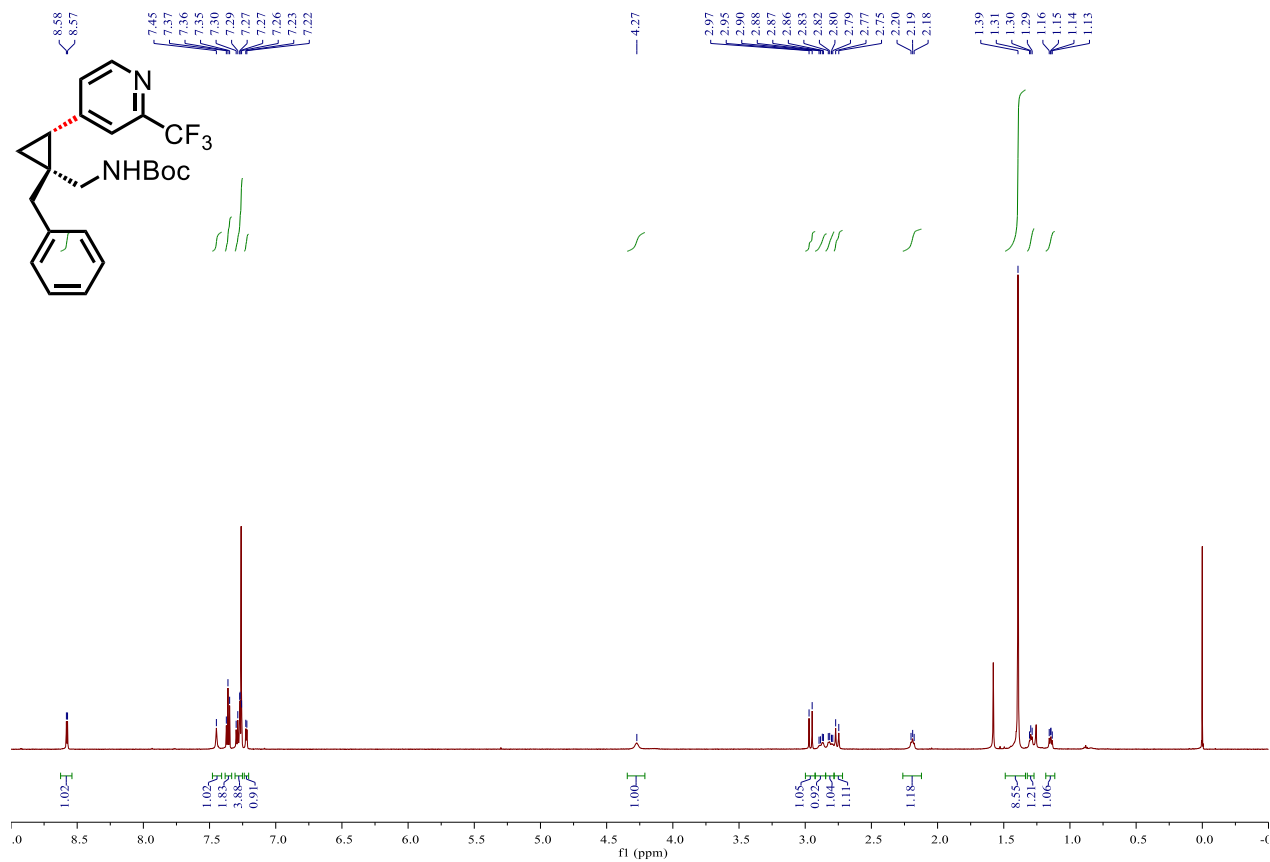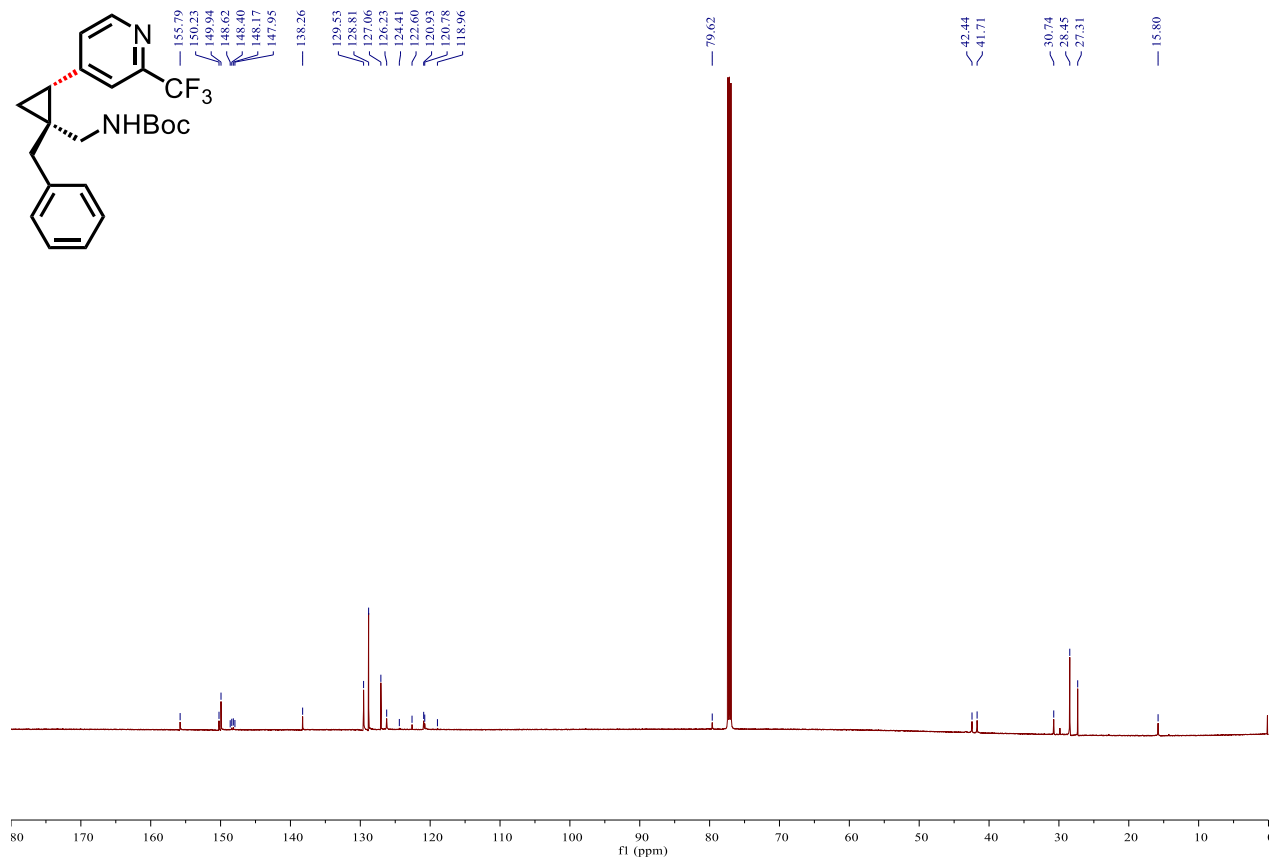

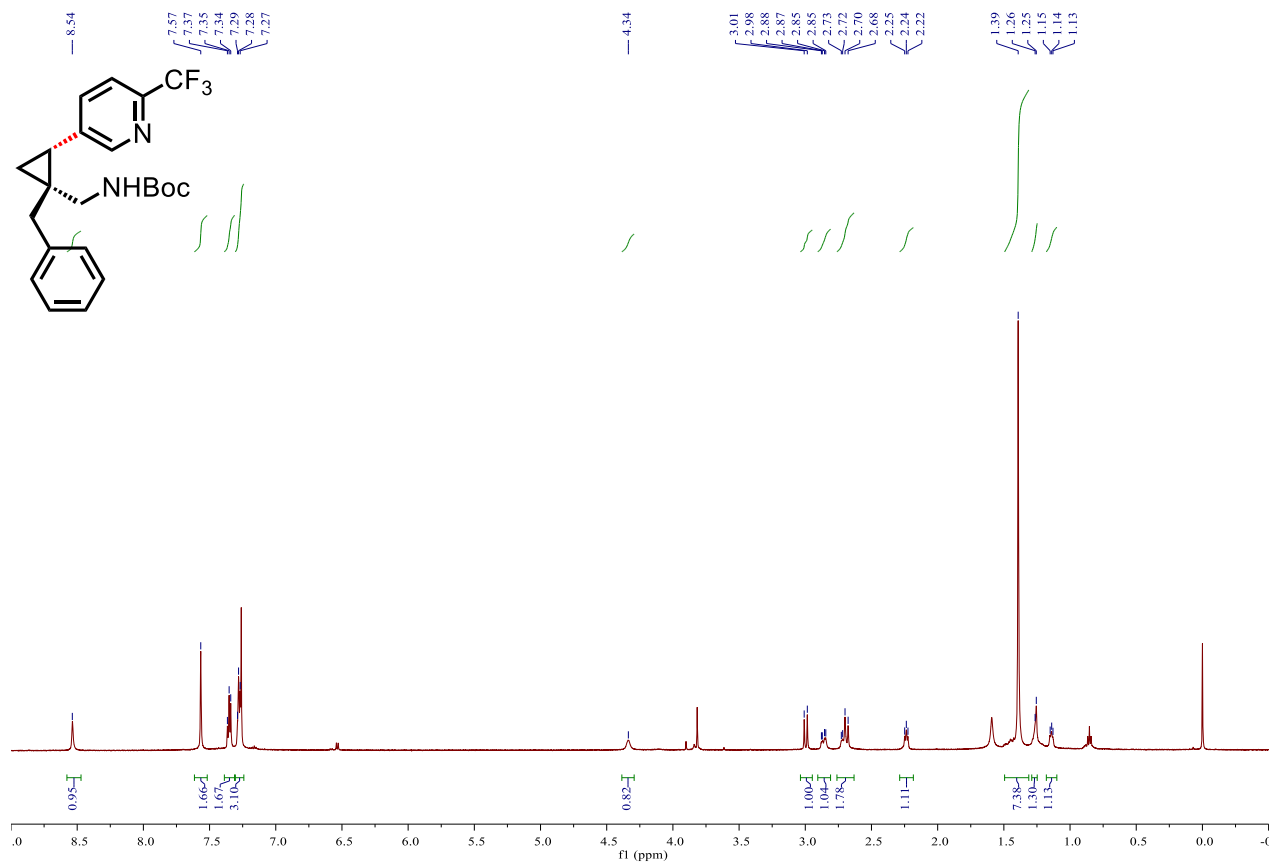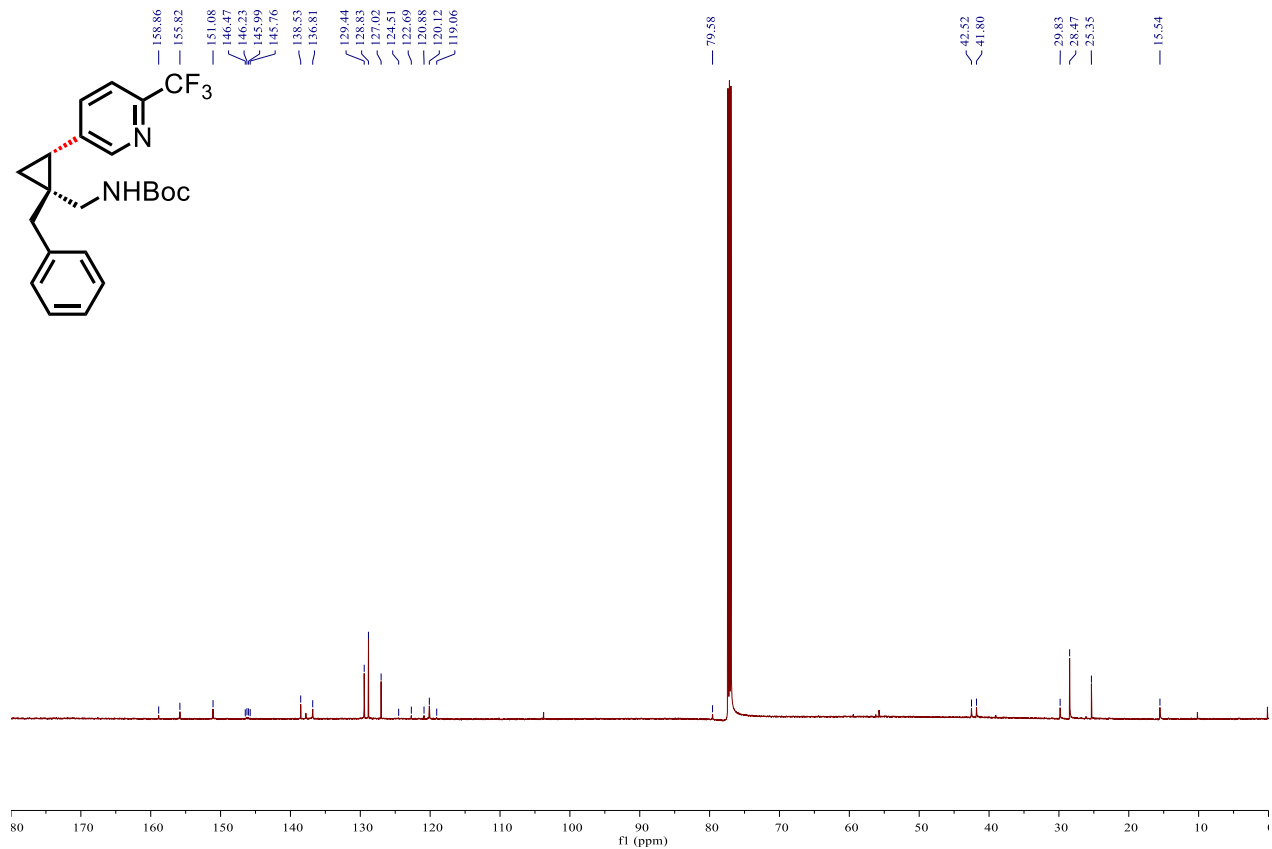

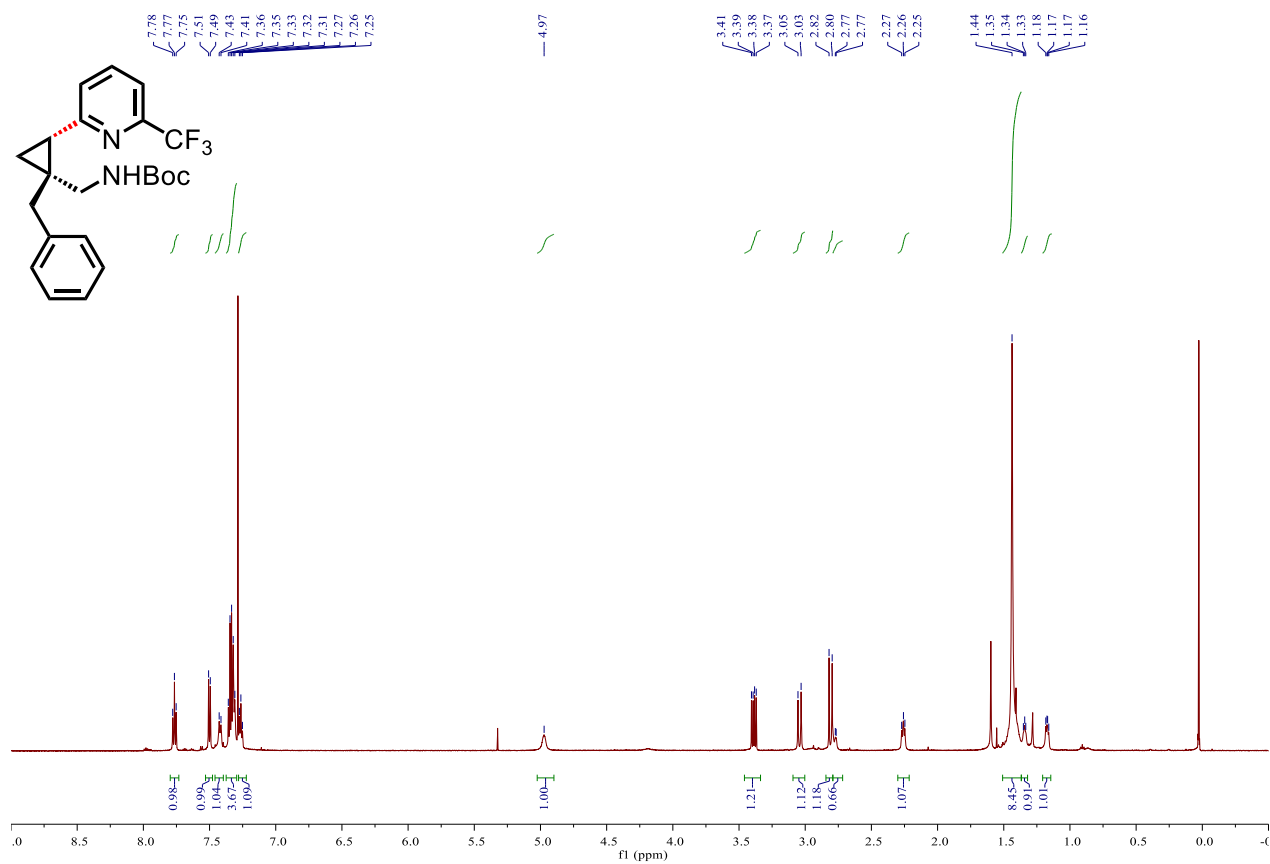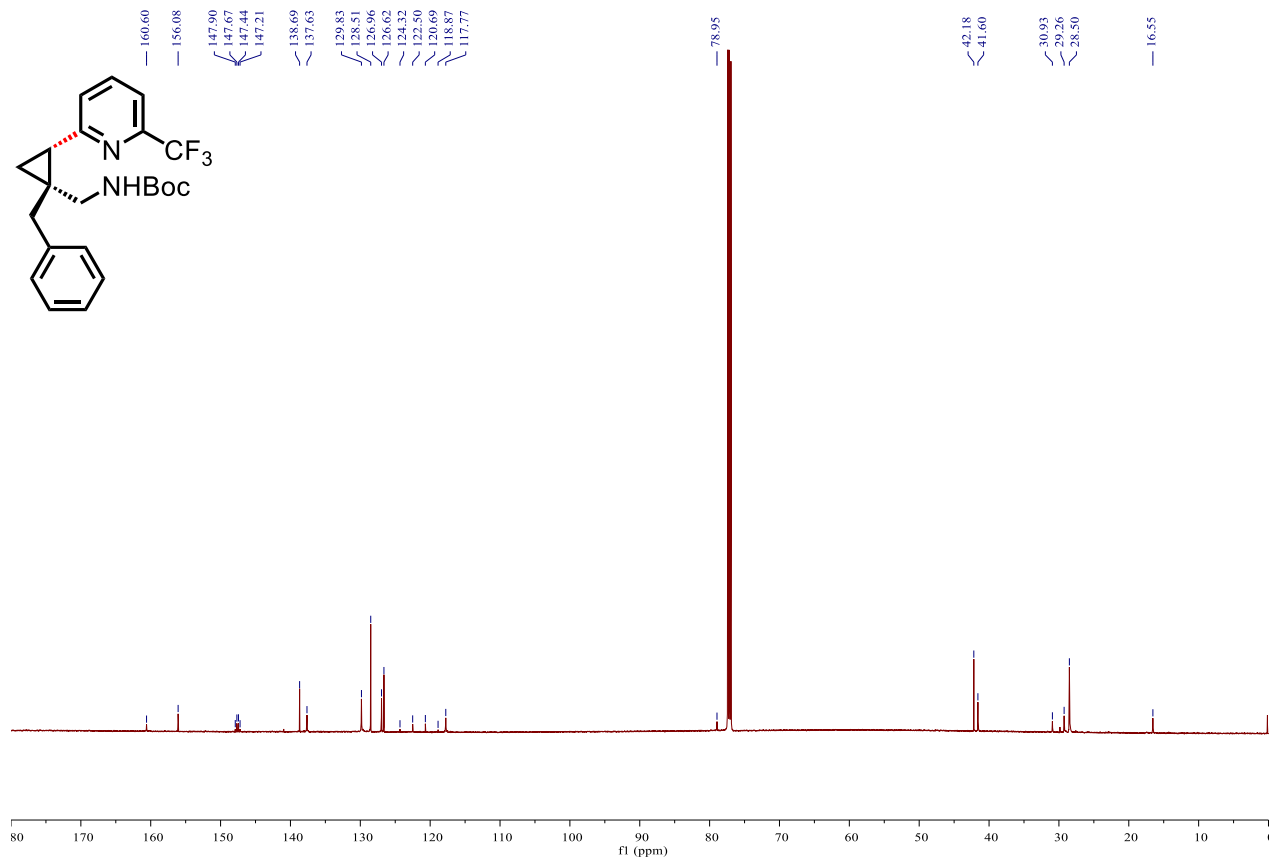

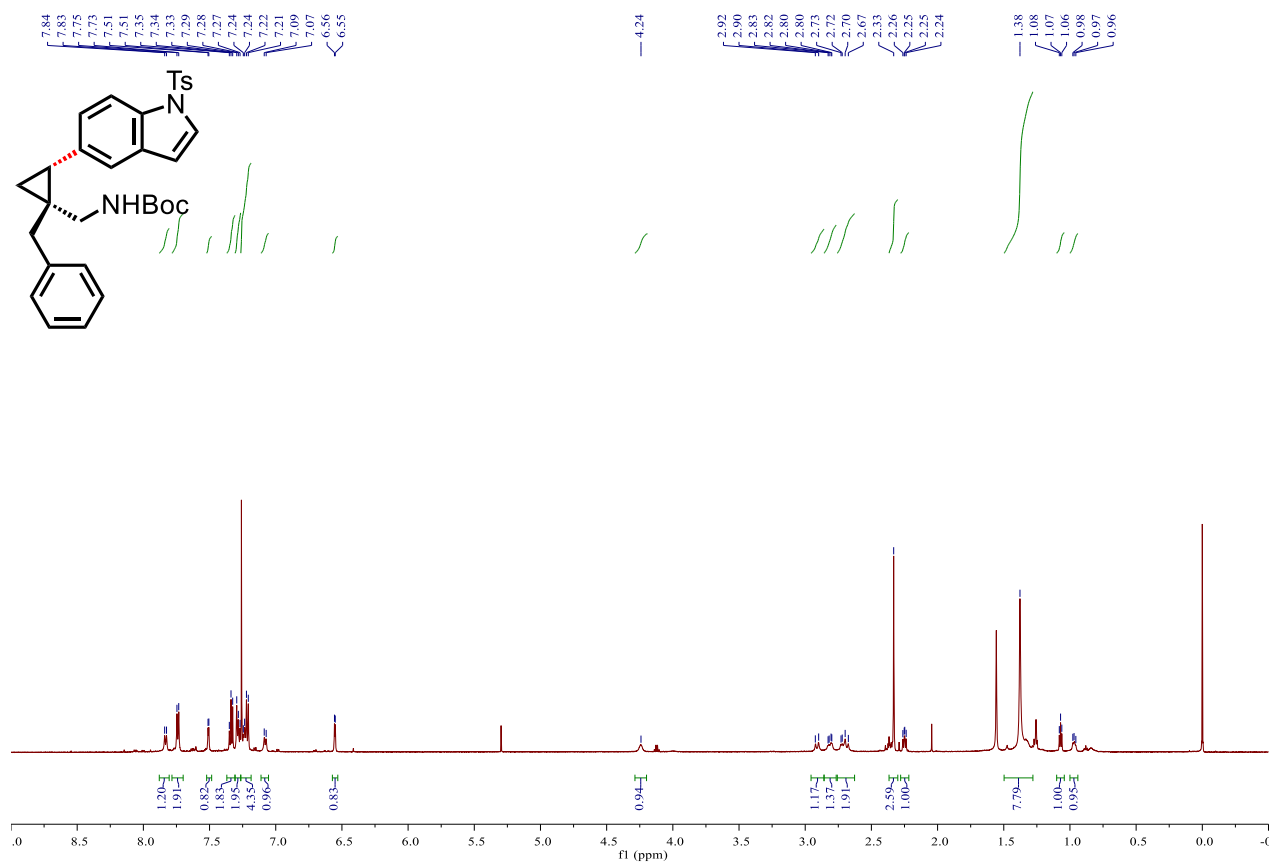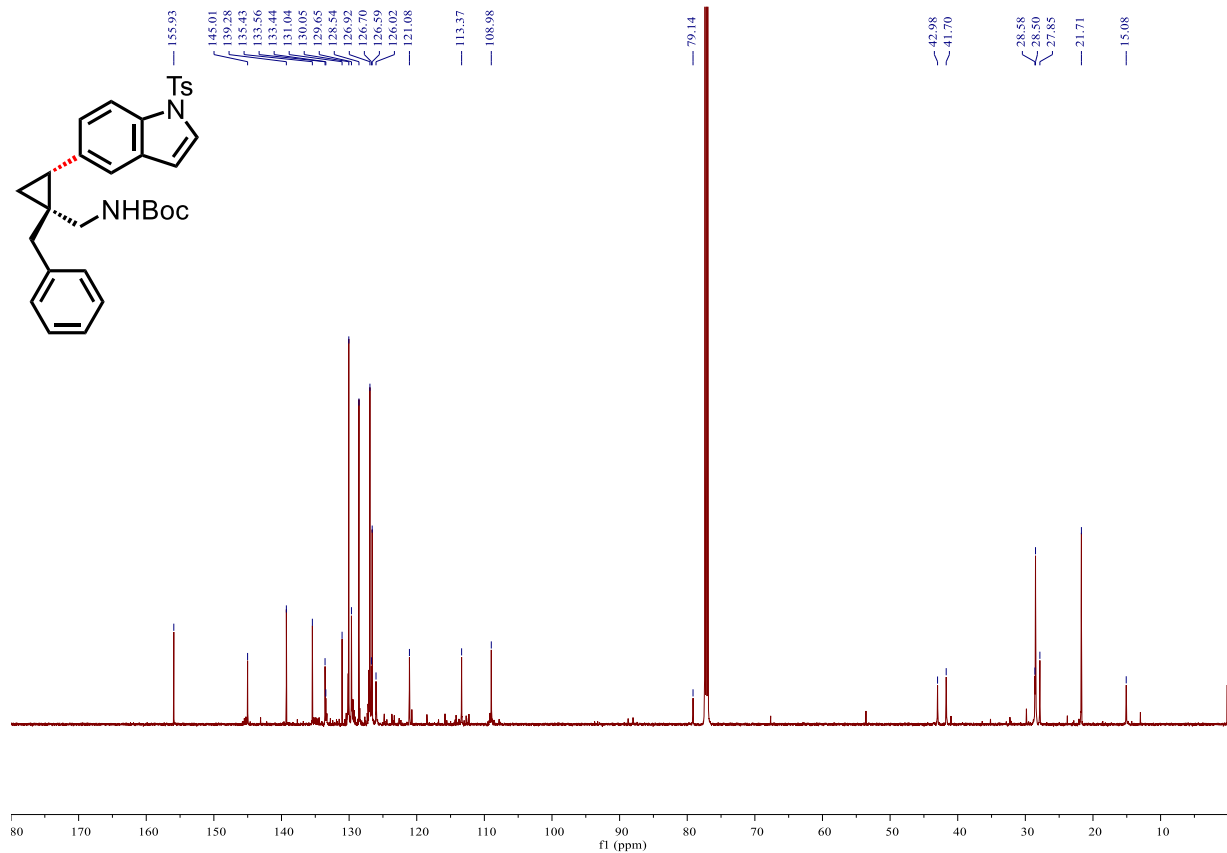

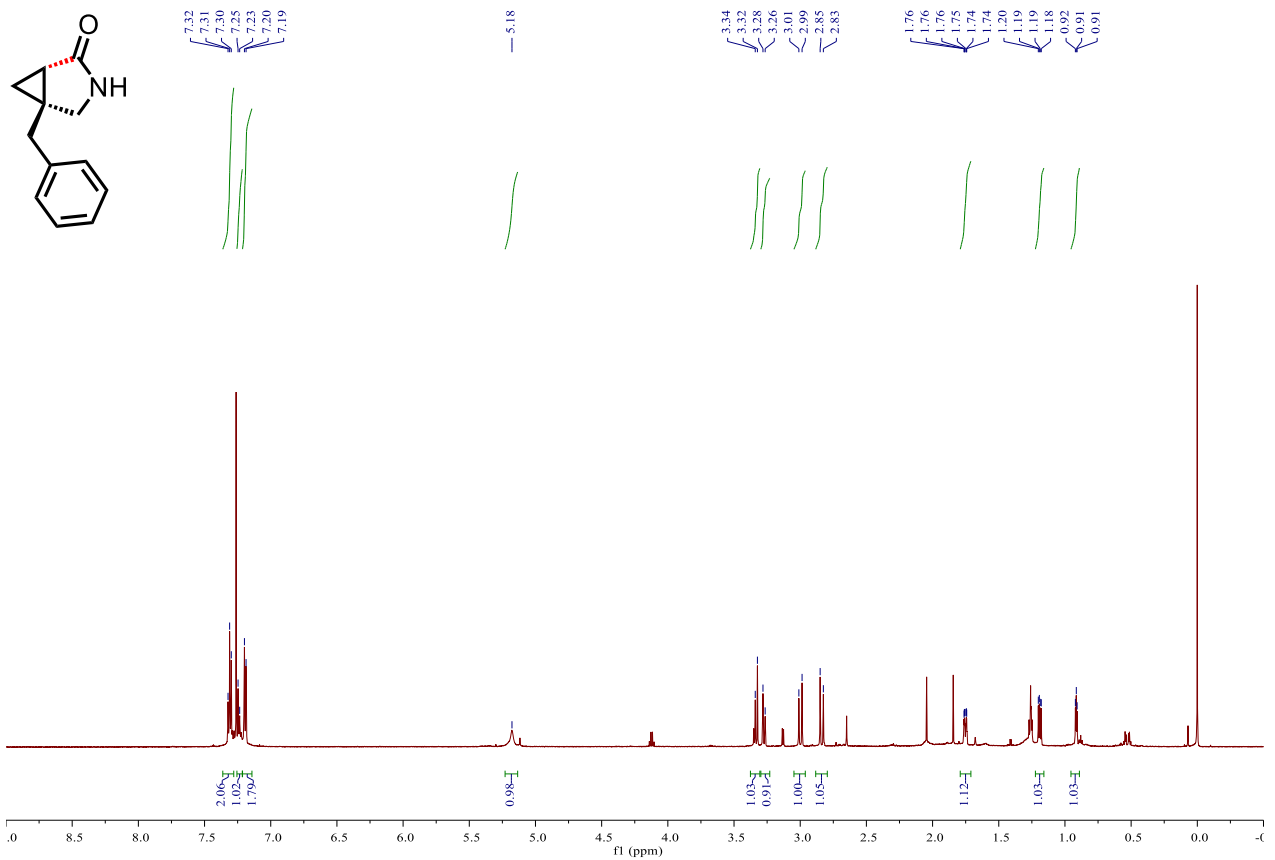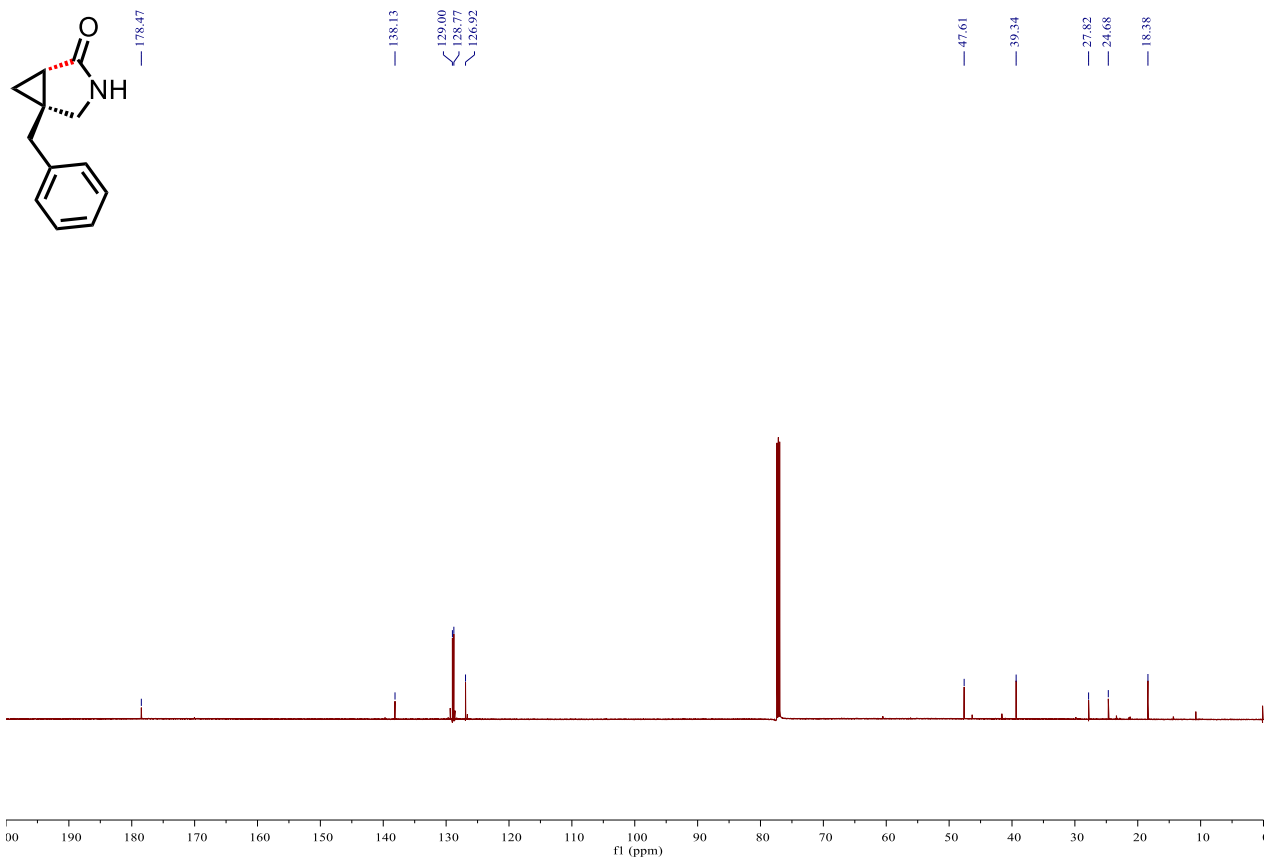

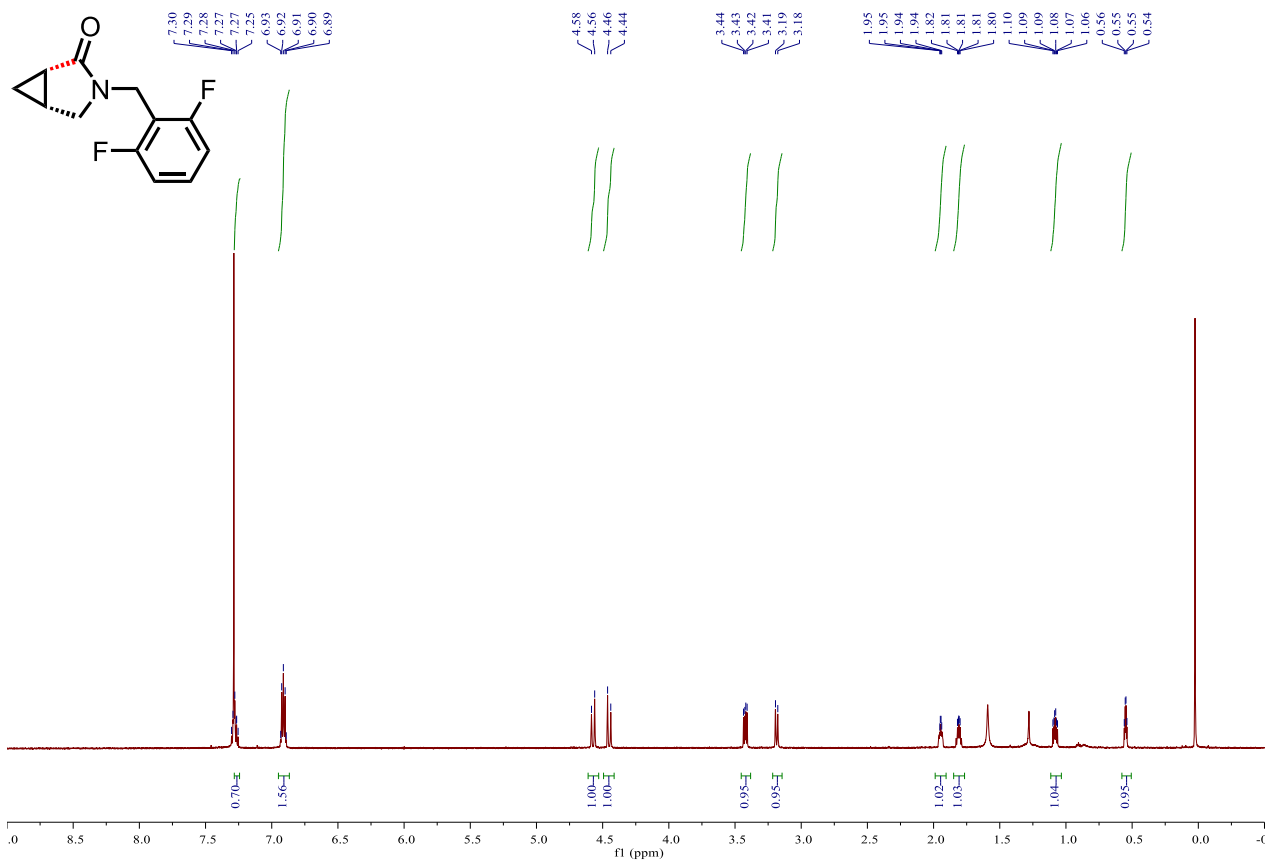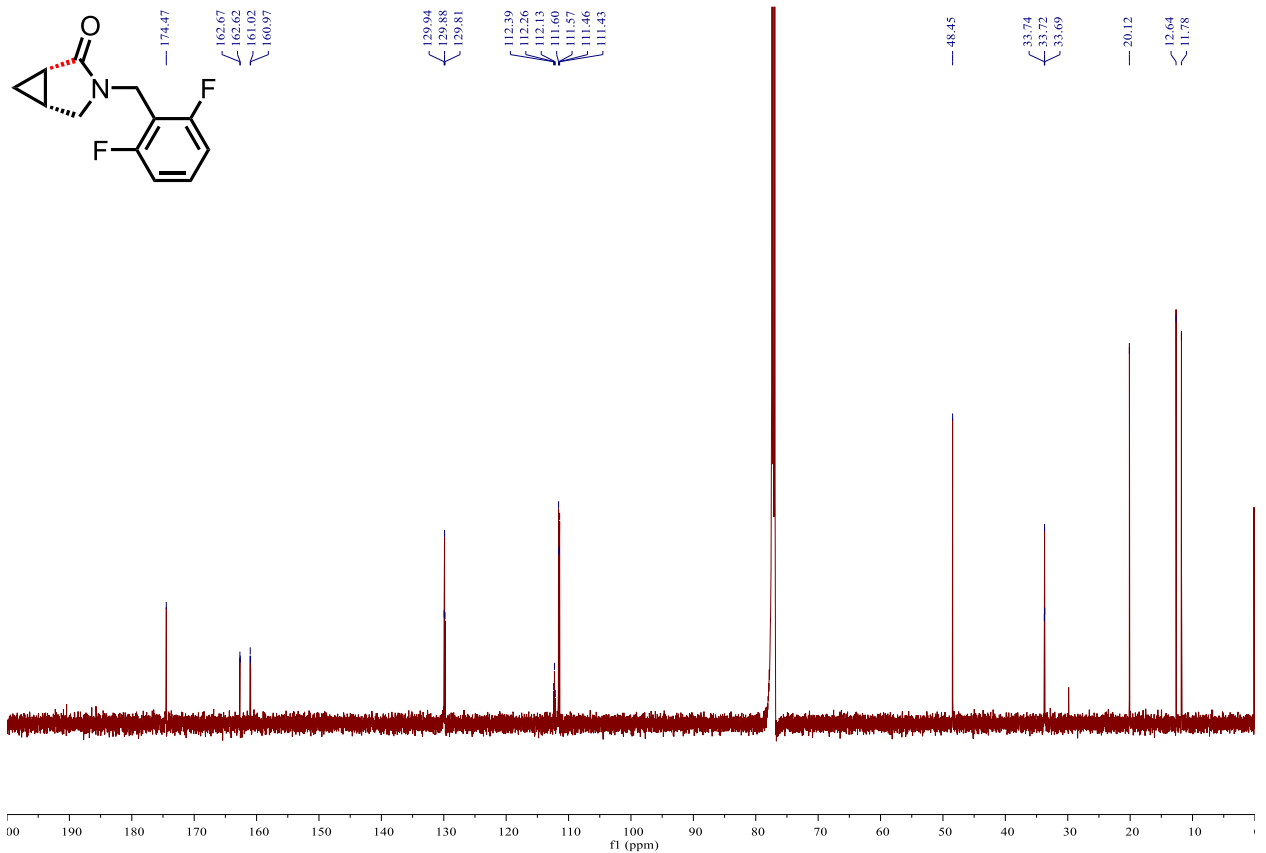



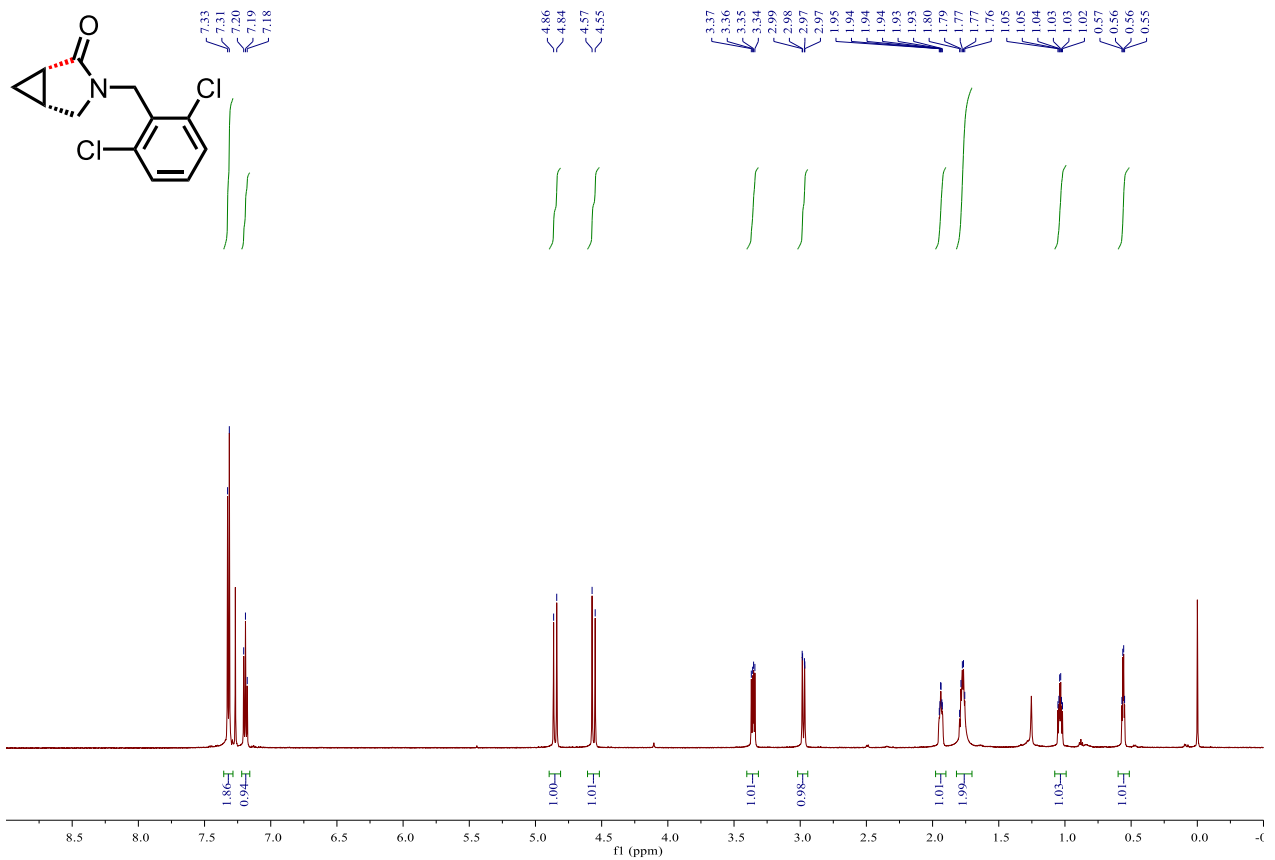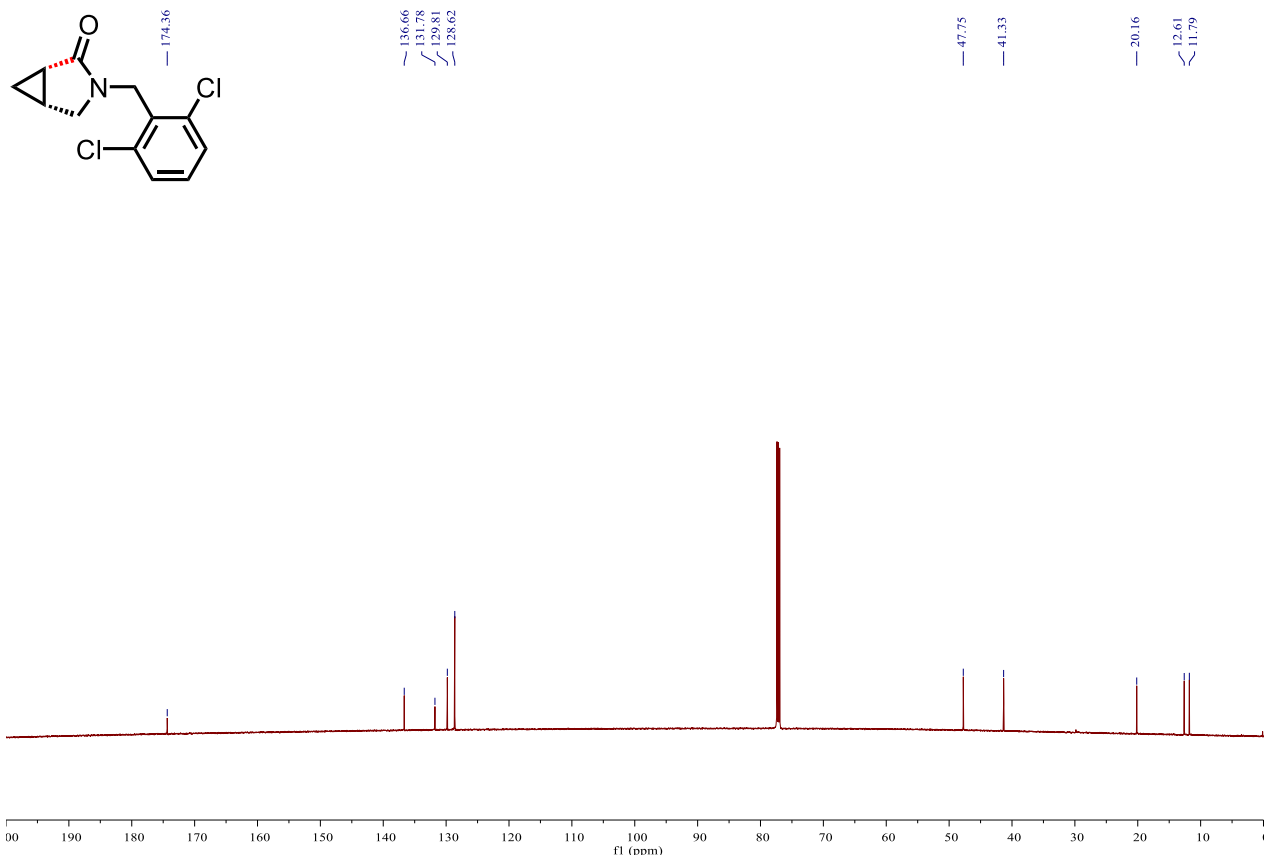

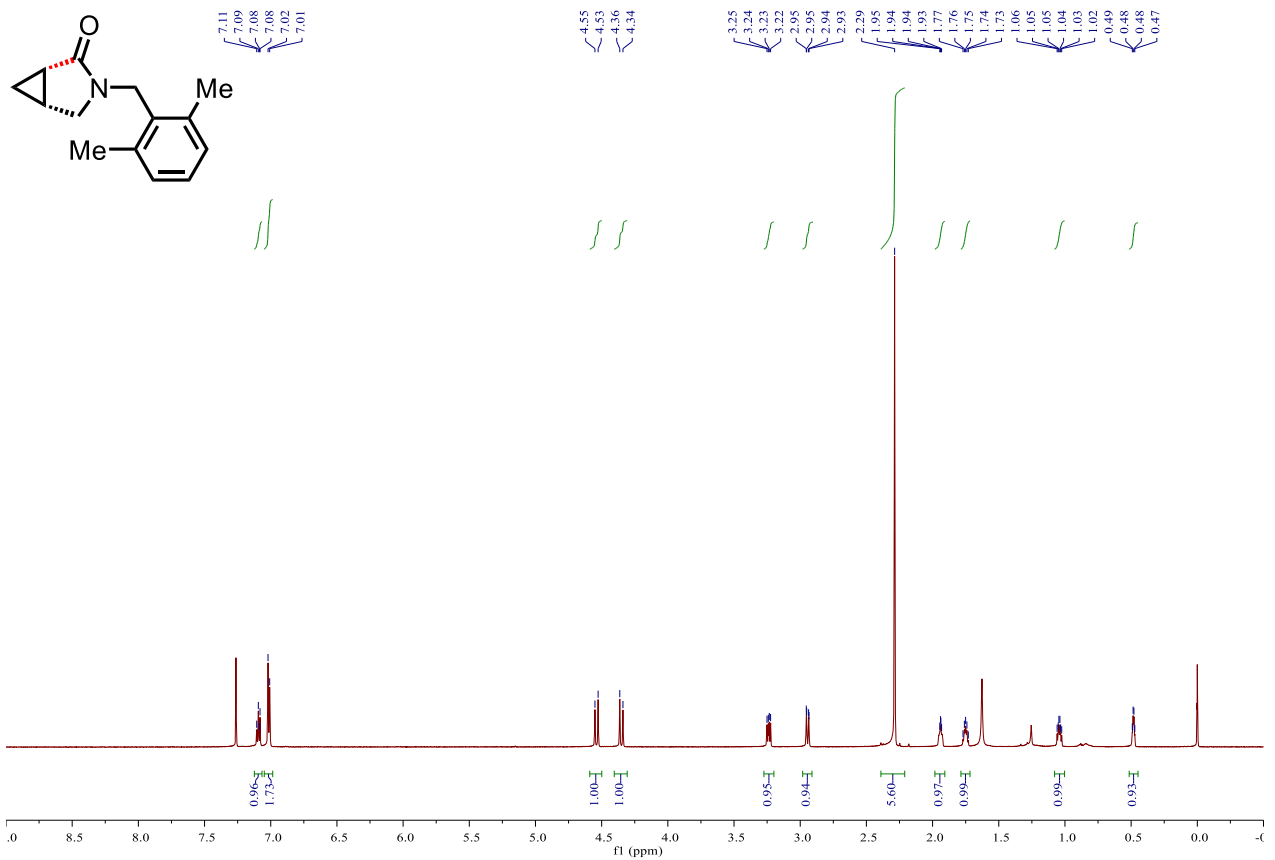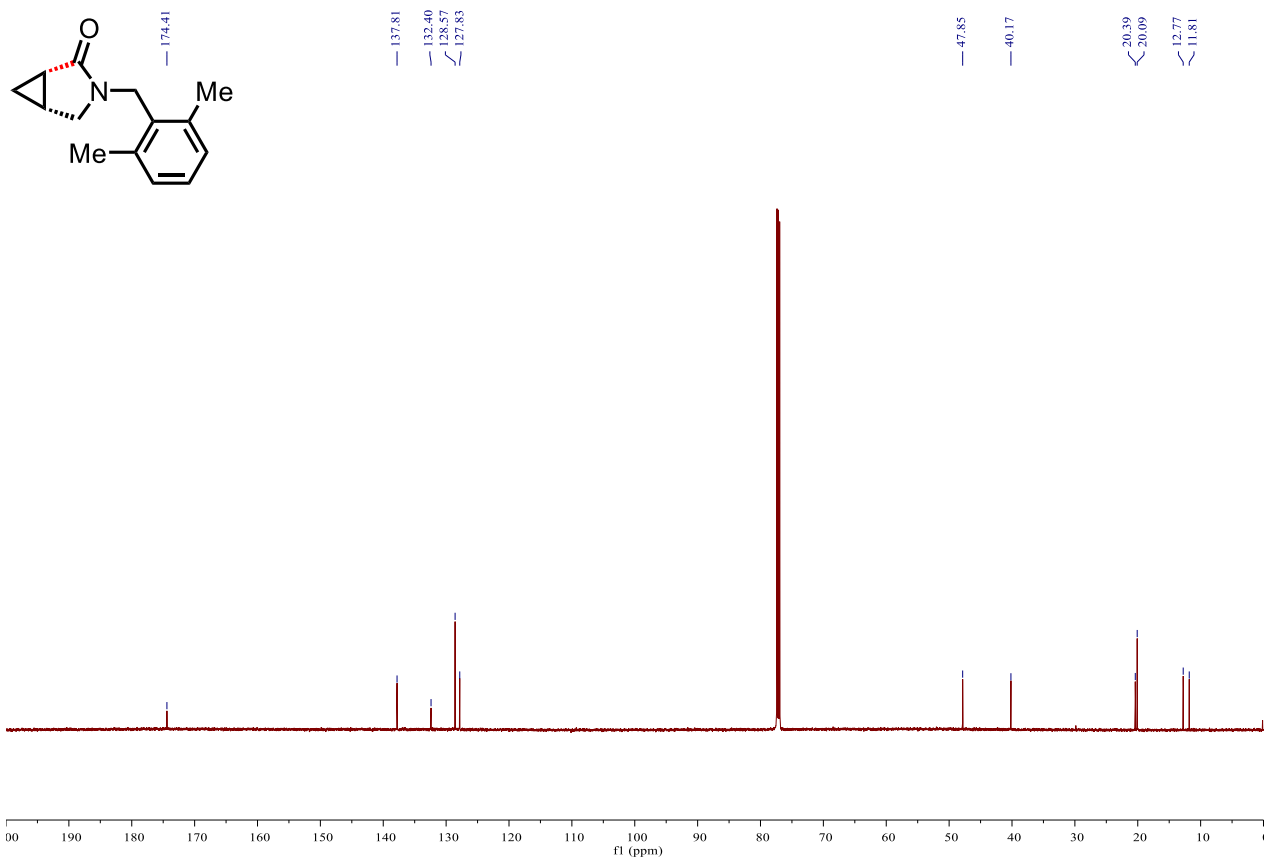

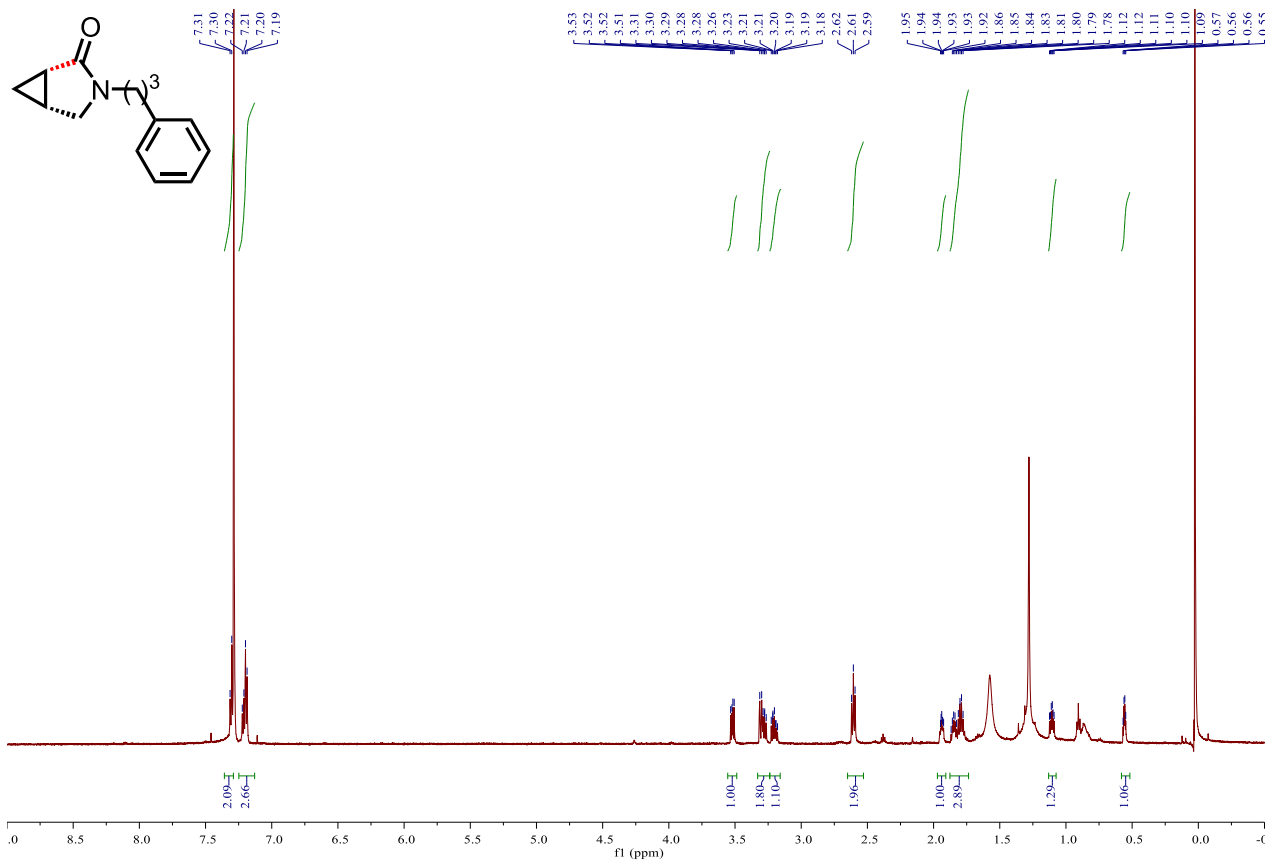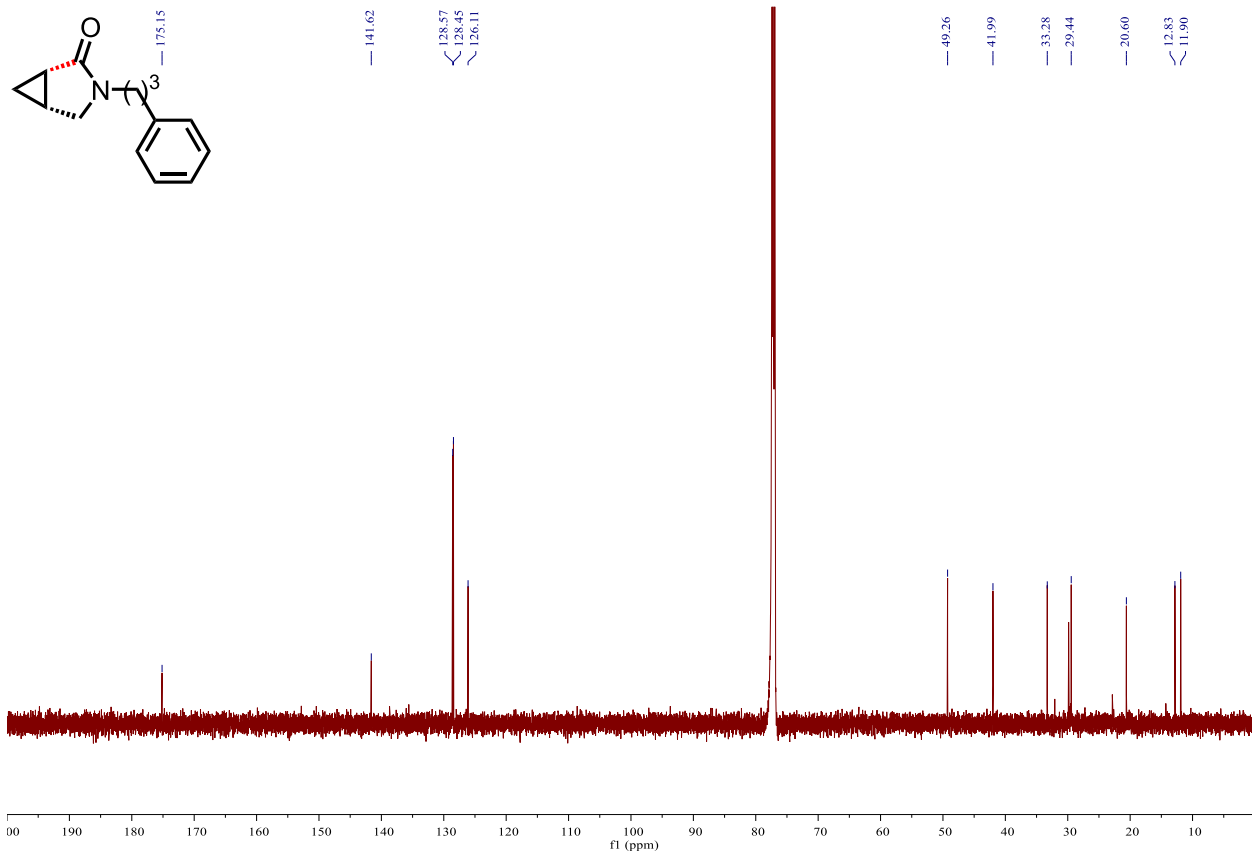

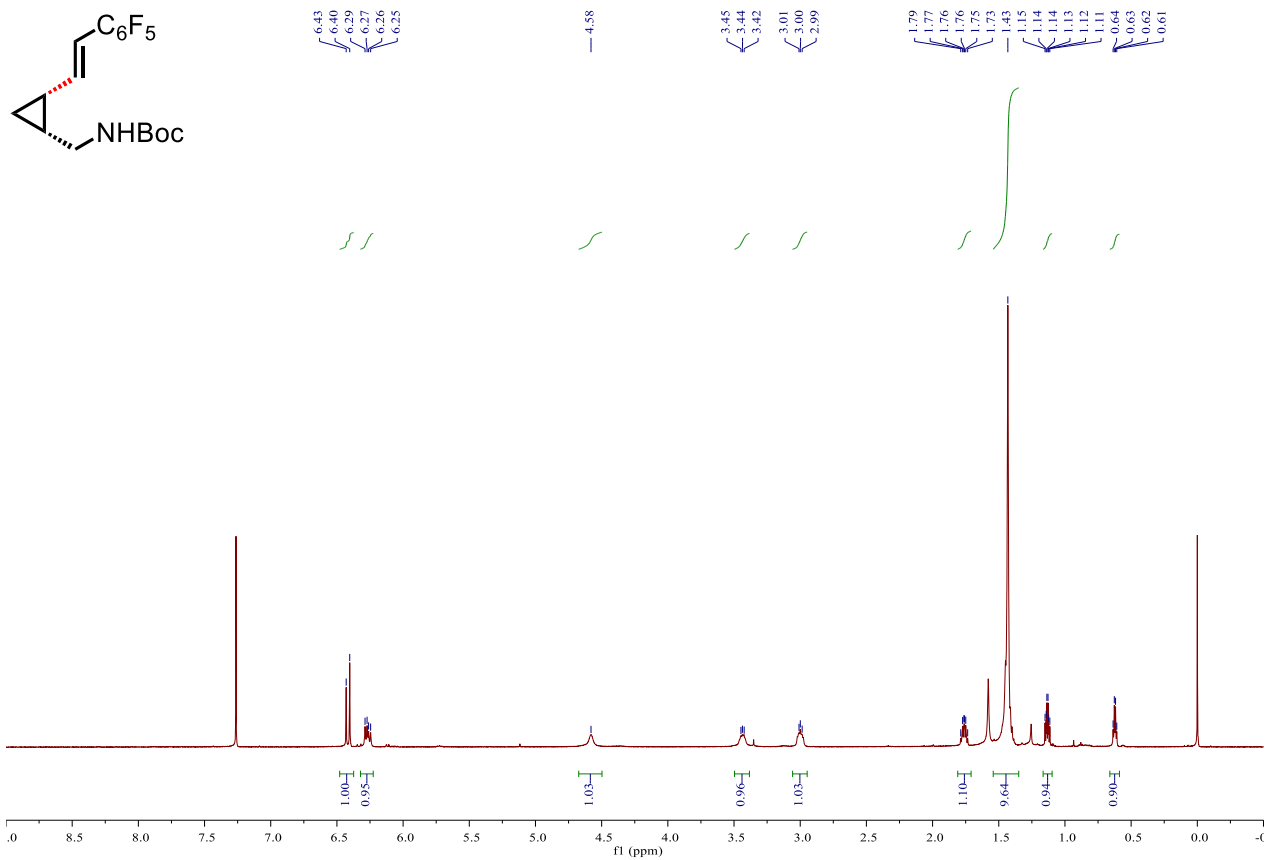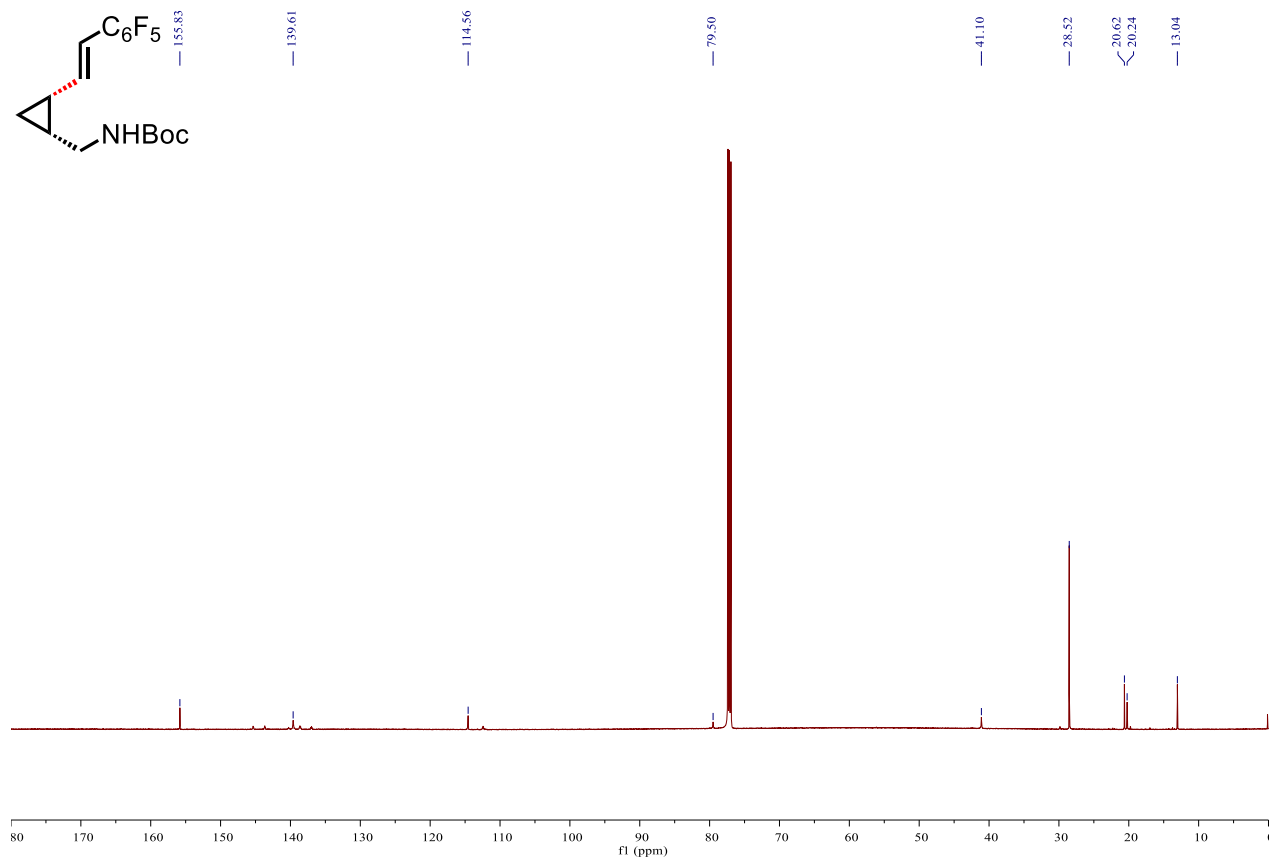

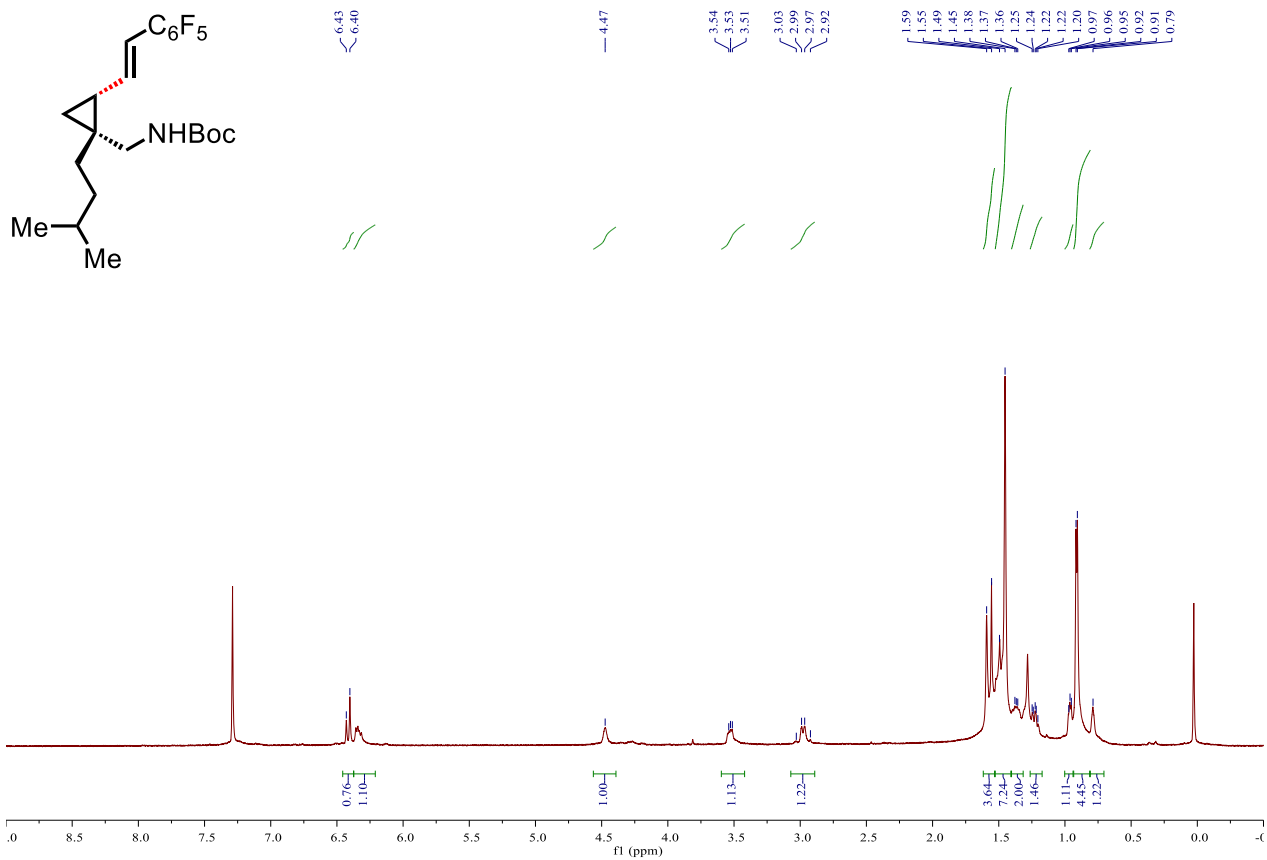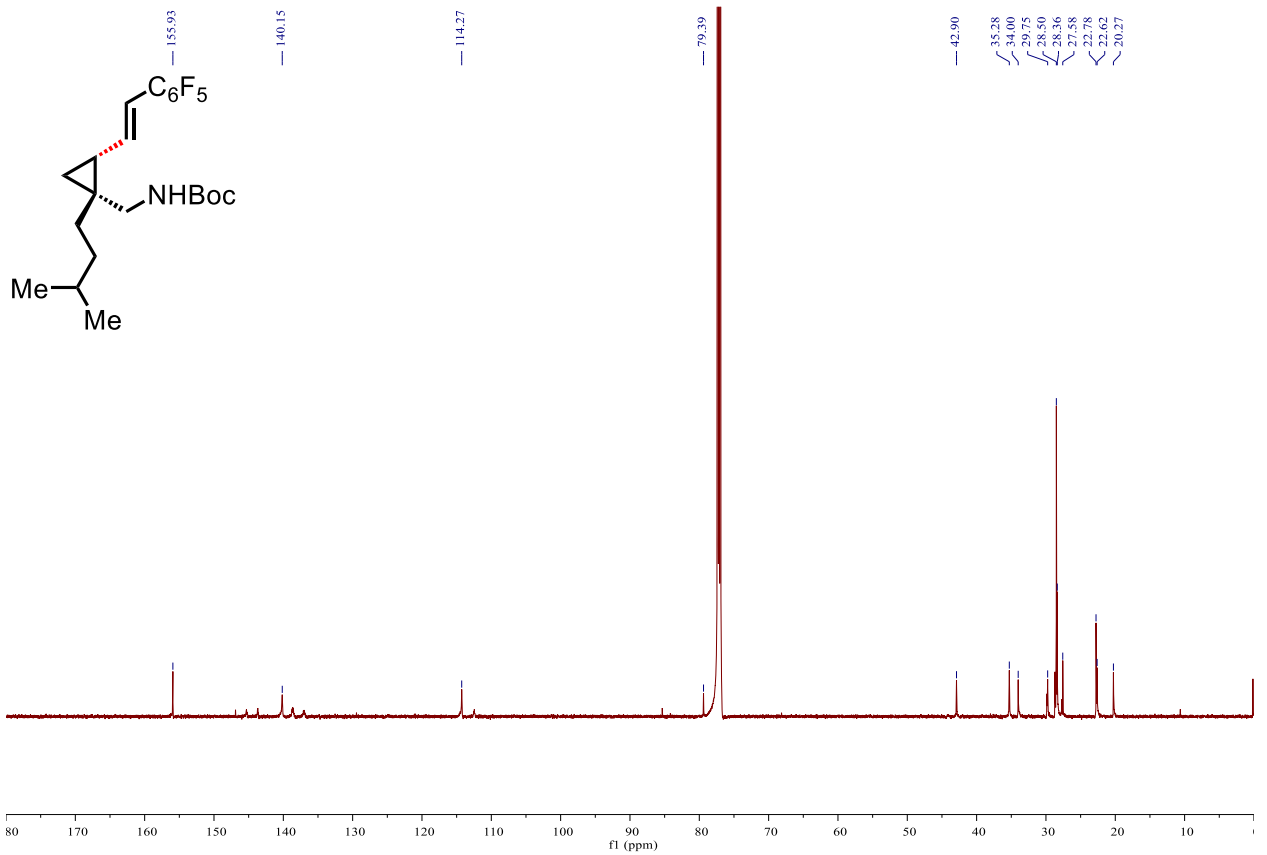

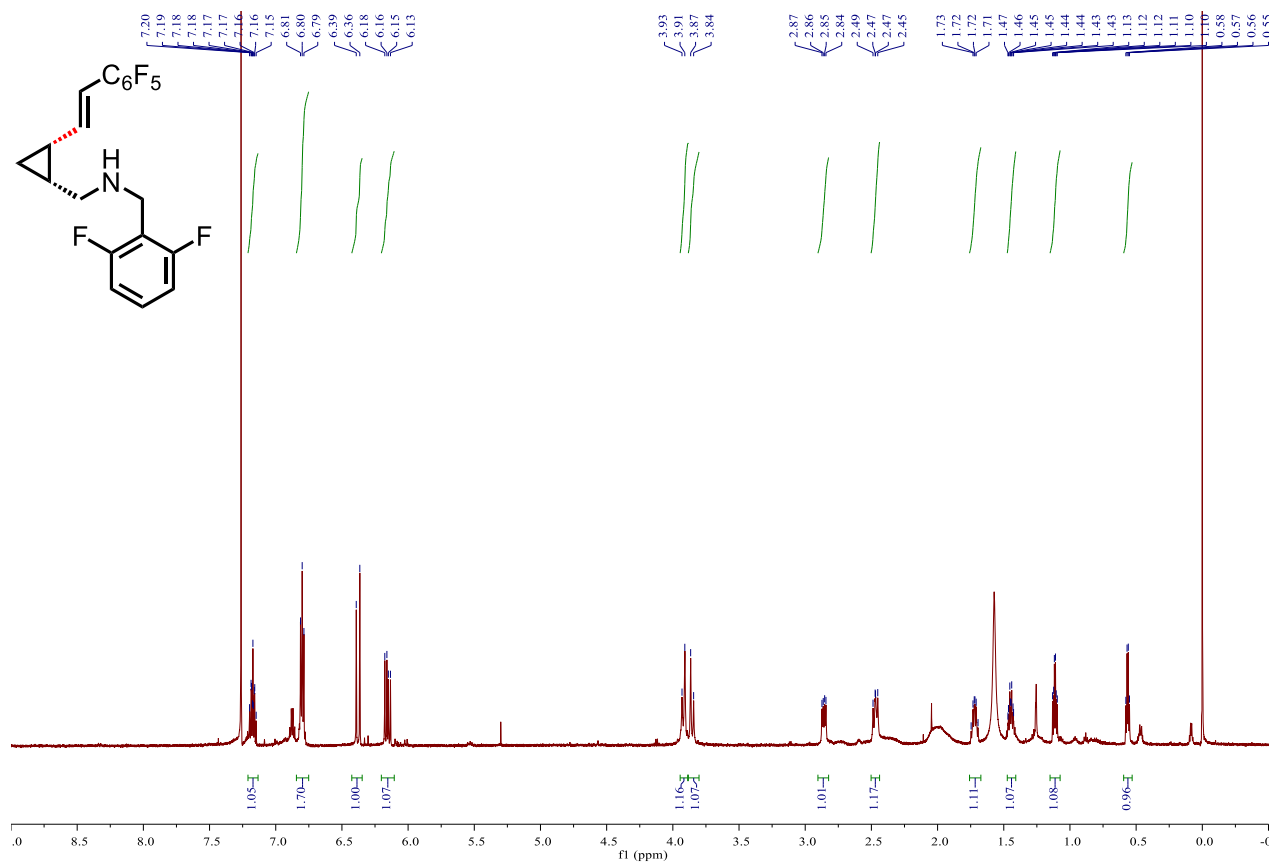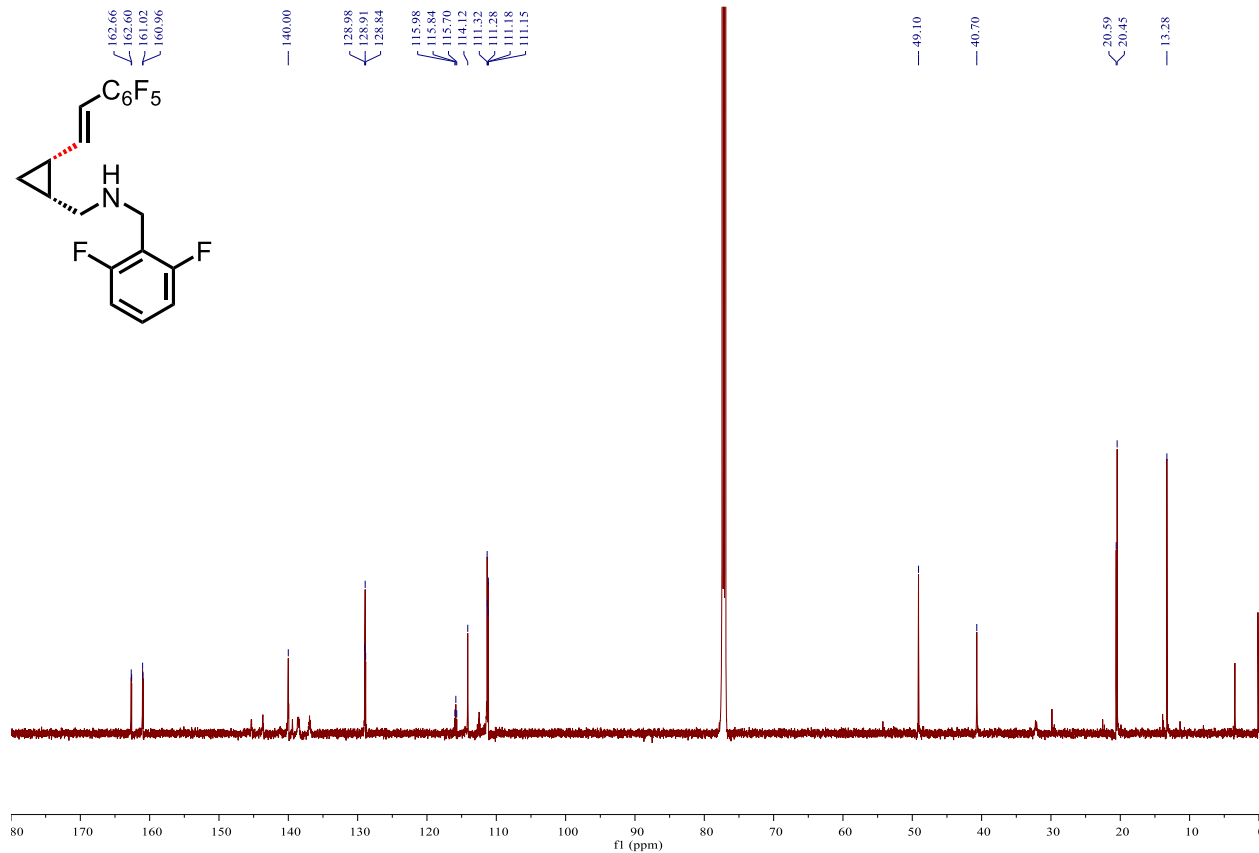

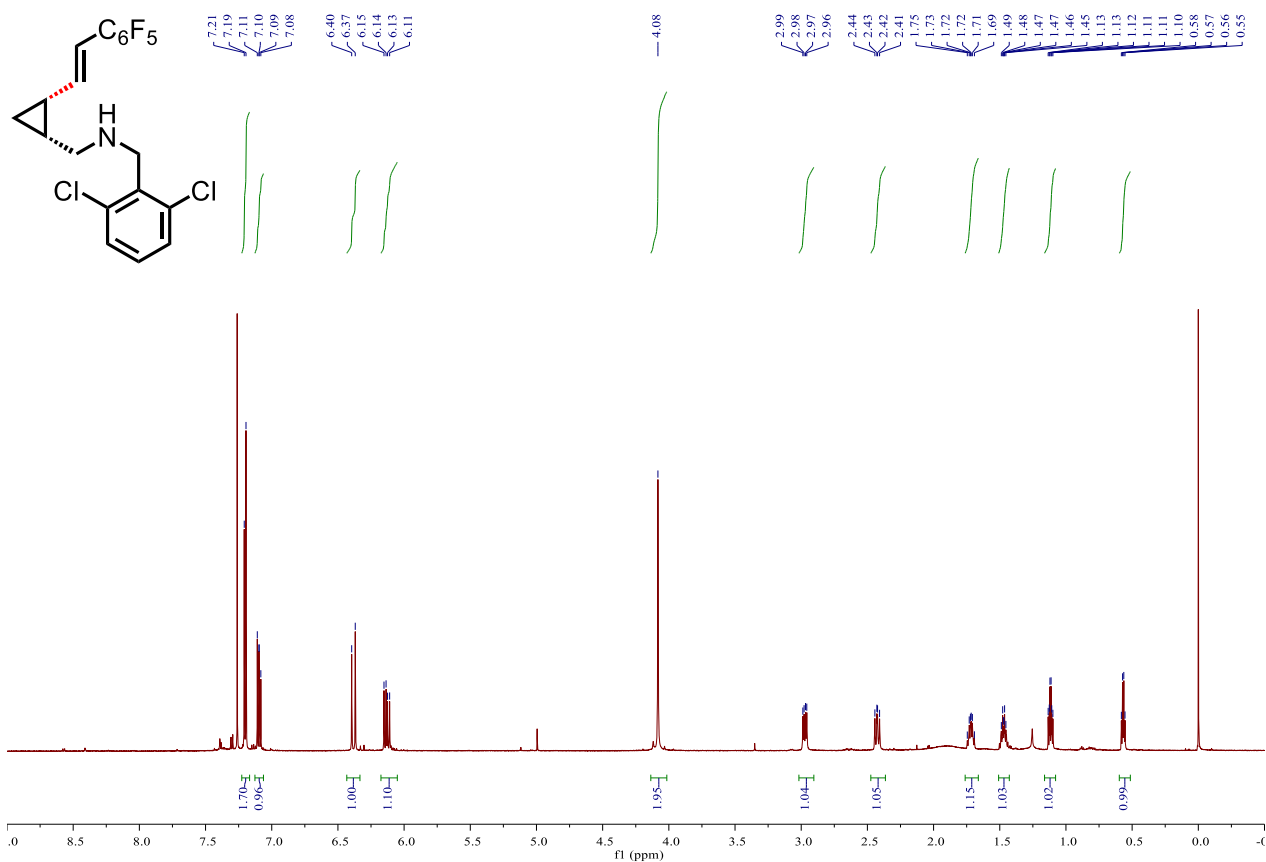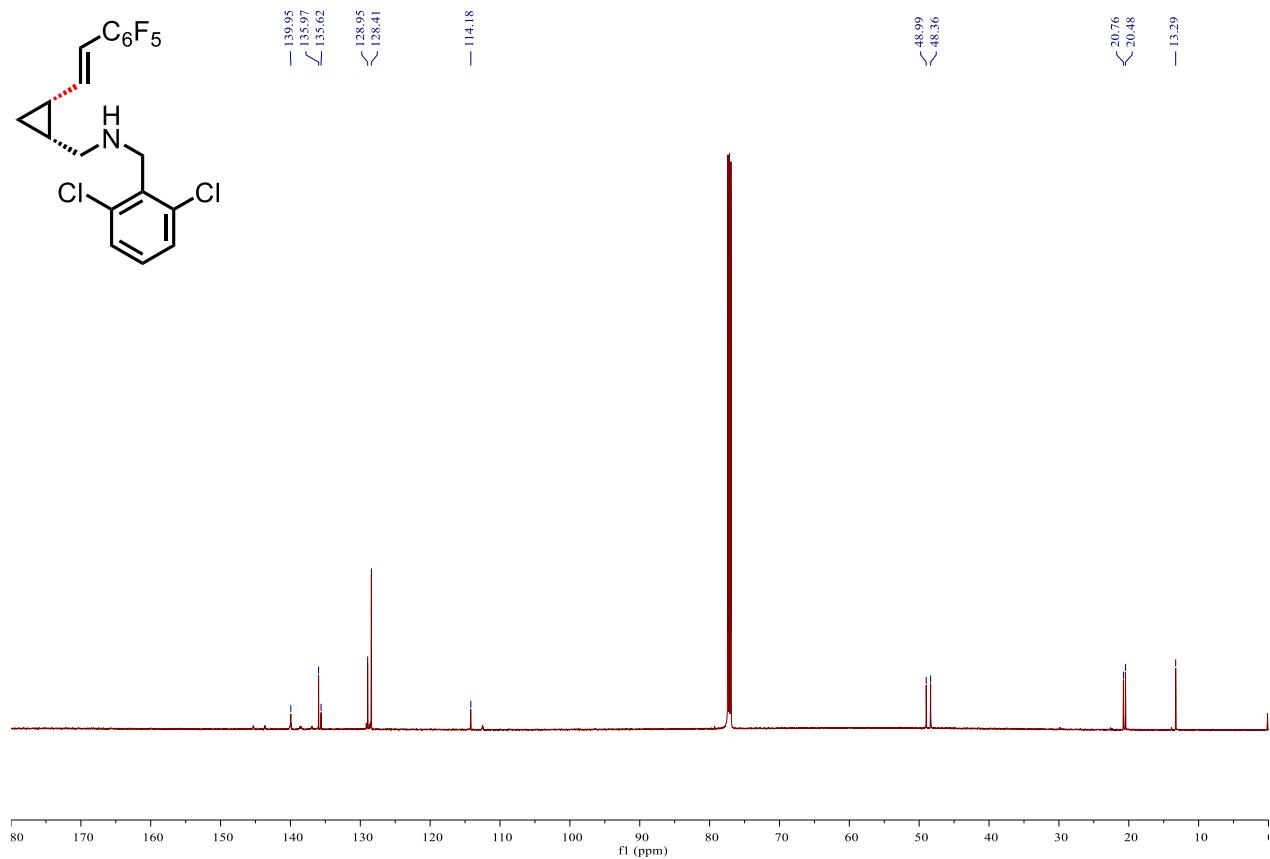

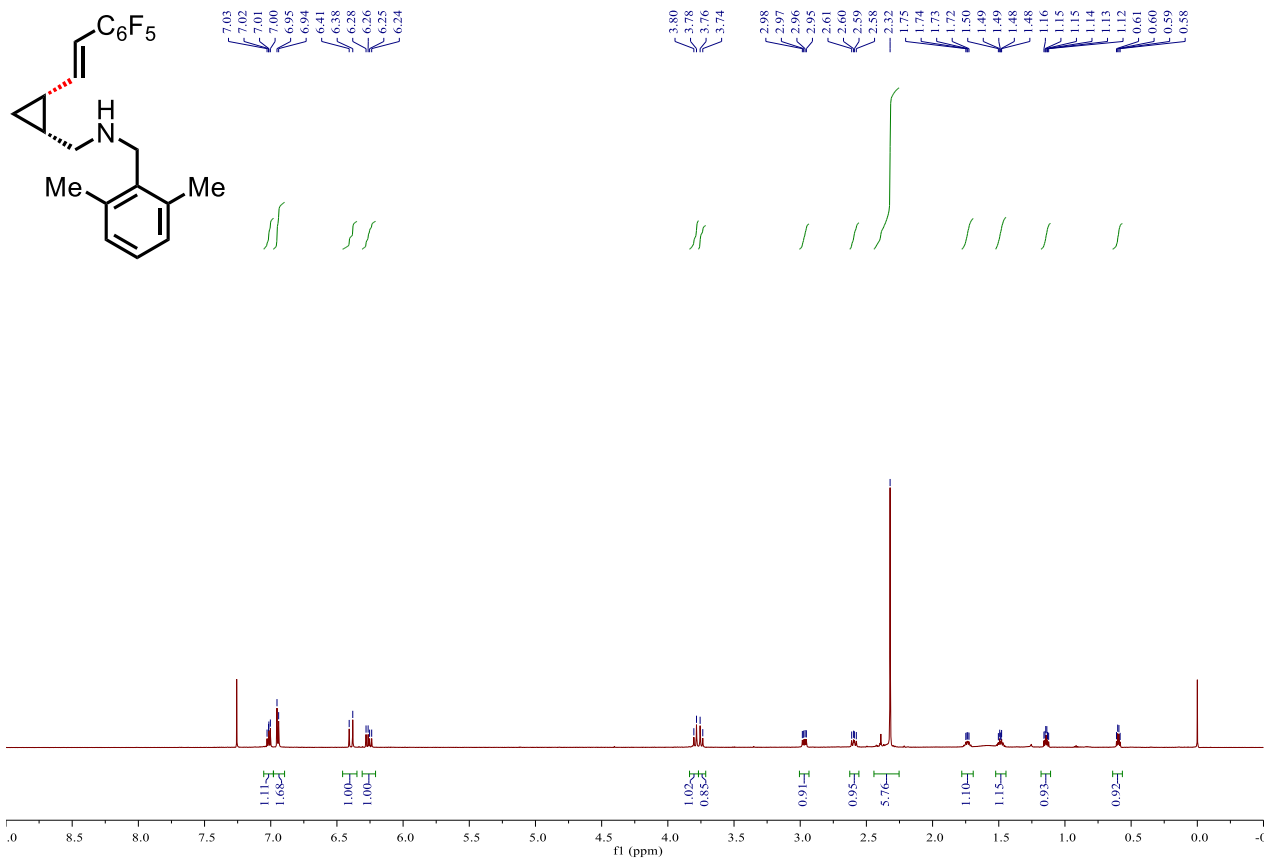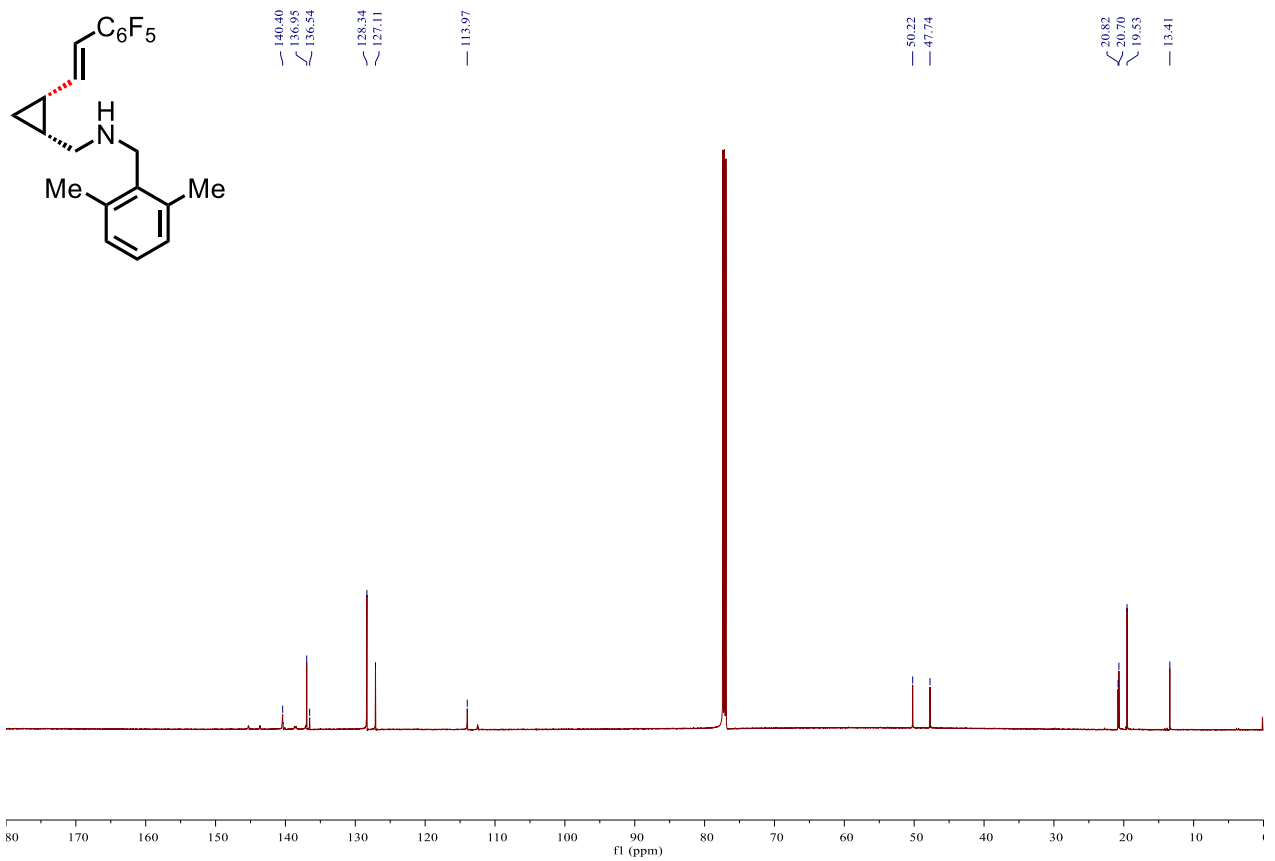

Supplement: NIHMS1639555-supplement-Supp__info.pdf [file NIHMS1639555-supplement-Supp__info.pdf]
